# Supplementary material for: Transcriptomic and Genetic Associations between Alzheimer’s Disease, Parkinson’s Disease, and Cancer
Source: MDPI journal article supplement (doi:10.3390/cancers13122990), 2021-06-15
Supplement: s1 [file s1]

# Transcriptomic and Genetic Associations between Alzheimer's Disease, Parkinson's Disease, and Cancer

Jaume Forés-Martos <sup>1,2,3</sup>, Cesar Baullosa <sup>4,†</sup>, David Rodrigo-Domínguez <sup>5,†</sup>, Jon Sánchez-Valle <sup>6,†</sup>, Beatriz Suay-García <sup>2,3</sup>, Joan Climent <sup>2,7</sup>, Antonio Falcó <sup>2,3</sup>, Alfonso Valencia <sup>6,8</sup>, Joan Anton Puig-Butillé <sup>9,10</sup>, Susana Puig <sup>10,11</sup> and Rafael Tabarés-Seisdedos <sup>1,12,13,\*</sup>

**Citation:** Forés-Martos, J.; Baullosa, C.; Rodrigo-Domínguez, D.; Sánchez-Valle, J.; Suay-García, B.; Climent, J.; Falcó, A.; Valencia, A.; Puig-Butillé, J.A.; Puig, S.; et al. Transcriptomic and Genetic Associations between Alzheimer's Disease, Parkinson's Disease, and Cancer. *Cancers* **2021**, *13*, 2990. <https://doi.org/10.3390/cancers13122990>

Academic Editors: Alexandra Kretz and Annamaria Brioli

Received: 6 May 2021

Accepted: 11 June 2021

Published: 15 June 2021

**Publisher's Note:** MDPI stays neutral with regard to jurisdictional claims in published maps and institutional affiliations.

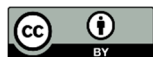

**Copyright:** © 2021 by the authors. Licensee MDPI, Basel, Switzerland. This article is an open access article distributed under the terms and conditions of the Creative Commons Attribution (CC BY) license (<http://creativecommons.org/licenses/by/4.0/>).

- <sup>1</sup> Biomedical Research Networking Center of Mental Health (CIBERSAM), 28029 Madrid, Spain; jaume.foresmartos@uchceu.es
- <sup>2</sup> ESI International Chair@CEU-UCH, Universidad Cardenal Herrera-CEU, CEU Universities, San Bartolomé 55, 46115 Alfara del Patriarca, Spain; beatriz.suay@uchceu.es (B.S.-G.); joan.climentbataller@uchceu.es (J.C.); afalco@uchceu.es (A.F.)
- <sup>3</sup> Departamento de Matemáticas, Física y Ciencias Tecnológicas, Universidad Cardenal Herrera-CEU, CEU Universities, San Bartolomé 55, 46115 Alfara del Patriarca, Spain
- <sup>4</sup> IES Miguel Catalán, 28823 Coslada, Spain; cesarboullosa@gmail.com
- <sup>5</sup> Consorcio Hospital General de Valencia, Servicio de Medicina Interna, 46014 Valencia, Spain; darodo@alumni.uv.es
- <sup>6</sup> Barcelona Supercomputing Center (BSC), 08034 Barcelona, Spain; jon.sanchez@bsc.es (J.S.-V.); alfonso.valencia@bsc.es (A.V.)
- <sup>7</sup> Departamento de Producción y Sanidad Animal, Salud Pública Veterinaria y Ciencia y Tecnología de los Alimentos, Universidad Cardenal Herrera-CEU, CEU Universities, C/ Tirant lo Blanc 7, 46115 Alfara del Patriarca, Spain
- <sup>8</sup> Catalan Institution for Research and Advanced Studies (ICREA), 08010 Barcelona, Spain
- <sup>9</sup> Biochemical and Molecular Genetics Service, Hospital Clínic and August Pi i Sunyer Biomedical Research Institute (IDIBAPS), 08036 Barcelona, Spain; japuig@clinic.ub.es
- <sup>10</sup> Melanoma Unit, Hospital Clínic, Center for Networked Biomedical Research on Rare Diseases (CIBERER), Carlos III Health Institute (ISCIII); 08036 Barcelona, Spain; spuig@clinic.cat
- <sup>11</sup> Dermatology Department, Hospital Clínic and August Pi i Sunyer Biomedical Research Institute (IDIBAPS), 08036 Barcelona, Spain
- <sup>12</sup> Teaching Unit of Psychiatry and Psychological Medicine, Department of Medicine, University of Valencia, Blasco-Ibañez 15, 46010 Valencia, Spain
- <sup>13</sup> INCLIVA Health Research Institute, 46010 Valencia, Spain
- \* Correspondence: rafael.tabares@uv.es; Tel.: +44-(0)1865-617-855
- † These authors contributed equally to the work.

## Supplementary

### 1. Supplementary methods

#### 1.1. Search strategy and inclusion criteria

Searches for available datasets were performed in the following genomic data repositories: Gene Expression Omnibus (GEO, <https://www.ncbi.nlm.nih.gov/geo/>), Array Express (AE, <https://www.ebi.ac.uk/arrayexpress/>), and the cancer genome atlas (TCGA, <https://www.cancer.gov/about-nci/organization/ccg/research/structural-genomics/tcga>).

Transcriptomic datasets should include at least 3 cases and three control samples derived from matching tissues. To ensure that compatible preprocessing strategies could be applied to all studies, we only selected one channel microarray data derived from the most popular Affymetrix, Illumina, and Agilent platforms.

In the case of neurodegenerative (NDG) disorders, we focused on studies carried out using samples obtained from post-mortem brains and excluded datasets derived from other tissues, such as blood or

immortalized cell lines. To reduce the heterogeneity that would be introduced by the inclusion of datasets from different brain regions, we selected a specific brain region for each disorder. The choice was based on two criteria, data availability and strong evidence linking the specific brain region with the physiopathology of the disease under consideration. In the case of Alzheimer's disease, we only selected studies and samples derived from hippocampal tissues. Volume reduction, neural loss, and the presence of neurofibrillary tangles and beta-amyloid deposition are core features of AD found in hippocampal tissues [1]. For PD only datasets with *substantia nigra* samples were included since PD is characterized by progressive degeneration and loss of neurons in this brain region [2].

Cancer studies including primary tumor and matched tissue control samples were selected for inclusion, whereas datasets and samples based on blood, metastatic, or cell lines, were excluded.

Since the presence of studies derived from the same cohort could artificially inflate the differential gene expression meta-analysis results, efforts were made to exclude datasets containing potentially redundant sets of individuals.

**Supplementary Table 1** shows all the studies that met inclusion criteria, as well as information regarding the microarray platform and the number of samples (cases and controls) included before and after outlier sample filtering. The summary values of the study-level quality control and each study's inclusion status based on these values are also provided in the same table. **Supplementary Table 2** shows the TCGA datasets employed for the validation step using an alternative cohort of cancer samples.

### 1.2. Data preprocessing

Datasets generated using Affymetrix platforms were preprocessed as follows: CEL files were retrieved from GEO, AE or directly from the study authors, and the R packages oligo [3] and affy [4] were used to read them and to perform RMA normalization and summarization, which was followed by quantile between-sample normalization and log2 transformation. For Illumina platforms, non-normalized data was loaded to the R's environment using the limma package [5] and a set of custom functions. The Lumi package [6] was used to perform background correction using a normal exponential model fitting with the normexp RMA option selected, followed by quantile normalization and log2 transformation. Agilent data was preprocessed using the limma package [5] following the same preprocessing steps. We transformed dataset-specific IDs into ENTREZ IDs using annotation packages to harmonize probe annotations between different dataset platforms. Probes targeting the same gene were collapsed using the collapseRows function from the WGCNA package [7] and the MaxMean method. RNAseq data derived from TCGA was preprocessed as follows: The TCGAbiolinks package [8] was used to download gene-level counts derived from the HTSeq workflow. The TCGAanalyze\_Preprocessing function was then applied with a correlation threshold of 0.6. Next, the TCGAanalyze\_Normalization function was employed to carry out normalization using the gcContent method. TCGAanalyze\_Filtering was finally employed to remove mRNA transcripts with low expression values through the quantile method with a cutoff value of 0.30.

### 1.3. Quality control and outlier samples removal

We performed quality control and outlier sample detection using two different approaches for CNS and cancer-related datasets, respectively. Given the low amount of datasets and samples available for the analysis of CNS disorders, we selected a conservative and more computationally intensive approach to detect and remove outlier samples. We used three array quality measures described in detail below. Each one is aimed to evaluate a specific trait related to array quality in each sample. Measure 1 computes distances between arrays. The distance between two arrays  $a$  and  $b$   $d_{ab}$ , is the mean absolute difference between the expression values of all probes  $d_{ab} = \text{mean } |M_{ai} - M_{bi}|$ , where  $M_{ai}$  is the value of the  $i$ -th probe of array  $a$  and  $M_{bi}$  is the value of the  $i$ -th probe of array  $b$ . Measure 1 tags a particular sample as an outlier when the sum of the distances to all other arrays  $S_a = \sum_b d_{ab}$  is large. Measure 2 examines the array intensity distributions of the arrays. It is expected that the intensity distribution of the arrays has similar positions and widths. Intensity distributions of specific arrays that are very different from the rest of arrays distributions may indicate experimental problems. The Kolmogorov-Smirnov statistic  $K_a$  is used to measure the level of agreement between each array's distribution and the distribution of the pooled data. Arrays presenting a large deviation from the pooled intensities distribution are tagged as potential outliers by this measure. Finally, Measure 3 appraises the individual array quality by examining MA plots. where  $M$  is defined as  $M = \log_2(I_1) - \log_2(I_2)$  and  $A$  is defined as  $A = \frac{1}{2} (\log_2(I_1) + \log_2(I_2))$  where  $I_1$  is the intensity of the studied array and  $I_2$  is the intensity of a "pseudo"-array that consists of the median across arrays. It is expected that the mass of the distribution concentrates around the  $M = 0$  axis. Outlier detection was performed by computing Hoedffding's statistic  $D_a$  on the joint distribution of  $A$  and  $M$  for each array. Further information about the sample-level quality assessment can be found in the documentation of the ArrayQualityMetrics package [9]. Samples were removed from datasets only when the three measures tagged them as a potential outlier. To prevent that outlier samples were removed preferentially from cases or controls due to unbalanced study designs, the quality control and outlier detection procedures were carried out independently in each subgroup of samples. For cancer data, given the high amount of available studies and samples, we applied a less conservative outlier detection method, which had the advantage of being less computationally intensive. For each dataset, we computed array-array correlations. Then, the mean inter-array correlation was calculated. If the mean inter-array correlation was higher than 0.9, samples were not removed, and the complete dataset was included for downstream analyses. On the contrary, when the mean inter-array correlation was lower than the selected threshold, samples presenting more than two standard deviations in mean correlation measures with all other arrays were tagged as outliers and removed from the dataset. This procedure was repeated iteratively until a global mean inter-array correlation higher than 0.9 was reached. As in the instance of CNS-derived diseases, to prevent preferential removal of the case or control samples due to unbalanced study designs, the method was applied independently to cases and controls.

### 1.4. Study-level quality appraisal

Study-level quality control was carried out using the MetaQC package [10]. For each disorder, study-level quality control was carried out using all available studies after preprocessing using the set of genes jointly queried in all datasets. MetaQC computes six different quality control measures. IQC evaluates the homogeneity of the co-expression structure across studies, and it is based on the comparison of the co-expression structure of study *k* to the co-expression structure of all other studies. EQC appraises the consistency of the co-expression information with a pathway database. AQCg assesses the accuracy of biomarker detection by comparing the list of differentially expressed genes derived from study *k* to the list of differentially expressed genes obtained by performing meta-analysis using all studies except study *k*. AQCp represents an extension of AQCg where enriched pathways substitute genes. CQCg evaluates the consistency of the gene differential expression ranking from single study to the rank of differentially expressed genes obtained by performing a meta-analysis with all studies except study *k*, and CQCp assesses the consistency of the enriched pathway ranking. In general low values of each quality measure suggest poor agreement of study *k* to the rest of the studies indicating that it is a potential outlier, whereas high values indicate good agreement of a specific study with all other studies. Finally, MetaQC employs principal component analysis (PCA) biplots and a standardized mean rank (SMR) summary score to assist in identifying problematic studies. High SMR values indicate potential outlier studies. In the present study, we choose an SMR threshold of 7 as an exclusion criterion for potentially problematic studies.

#### *1.5. Differential gene expression meta-analyses*

Differential gene expression meta-analyses are known to increase the statistical power and reduce the noise of gene expression measurements [11]. For each disease, meta-analyses were carried out using Choi's et al. method [12] implemented in the MetaDE package [10]. All meta-analyses were performed using random effect models since high heterogeneity was expected, given our data's biological and technical variability. Genes showing a false discovery rate (FDR) adjusted *p*-value lower than 0.05 were considered to be differentially expressed.

#### *1.6. Transcriptomic associations between neurodegenerative disorders and cancers*

The expression profiles of each neurodegenerative disorder and all the studied cancer types were compared to evaluate the significance of the overlaps between the differentially expressed genes, as previously described [13-15]. For each neurodegenerative disorder and cancer pair, the significance of the four possible intersections formed by the upregulated and downregulated genes was evaluated by means of one-tailed Fisher's exact tests. The intersections were:

- 1) Genes upregulated in both a specific NDG disorder and the selected cancer type (Intersection A),
- 2) Genes downregulated in both a specific NDG disorder and the selected cancer type (Intersection B),
- 3) Genes upregulated in a specific NDG disorder and downregulated in the selected cancer type (Intersection C), and
- 4) Genes downregulated in a specific NDG disorder and upregulated in the selected cancer type (Intersection D).

Fisher's test p-values were corrected by multiple testing using the false discovery rate method (FDR). Overlaps showing adjusted p-values lower than 0.05 were considered significant. The background number of genes was set as the number of genes jointly included in the two meta-analyses under consideration, which depended on the platforms included in each meta-analysis. A cancer type was considered to be deregulated in the same direction as a NDG disorder when Intersections A and B were significant, and Intersections C and D were not. These cancer types were referred to as same direction deregulated cancers (SDDCs) and could be candidates for direct comorbidity with the specific NDG disorder. Conversely, a cancer type was considered to be deregulated in the opposite direction from a particular NDG disorder when intersections C and D were significant, but intersections A and B were not. These cancer types were referred to as opposite direction deregulated cancers (ODDCs) and could be candidates for inverse comorbidity with a specific NDG disorder. Additionally, to determine the strength of the overall associations between differential expression profiles, Pearson's correlations were computed using the Z-values obtained from each differential gene expression meta-analysis. Positive correlations suggest similar patterns of differential expression, while negative correlations would indicate opposite patterns.

#### *1.7. Validation of the NDG disorders and cancer associations using an independent cohort of cancers.*

The cancer genome atlas was queried for RNAseq-based experiments interrogating tumor samples for the tumor types included in our array-based analysis. Data was downloaded and preprocessed using the R package TCGAblinks [8]. DEseq2 [16] was used in order to compute differential gene expression between cases and controls. Results were used to perform intersection analysis following the same methodology explained for arrays in the previous section.

#### *1.8. Weighted co-expression network analyses*

We carried out consensus module detection for each disorder using all the datasets employed in the differential gene expression meta-analysis step and the WGCNA package [7]. Consensus modules are clusters of densely interconnected genes present across datasets. First, Bi -correlation networks were constructed for each study resulting in a set of gene-gene correlation matrices. The parameter choices for consensus module detection analyses were based on the parameters selected by the authors of the package in their analysis of a set of eight lung cancer datasets reported in [17]. Bi -correlation matrices were transformed into signed-hybrid adjacency matrices as described in the following equations:

$$a_{ij} = [cor(x_i, x_j)]^\beta \text{ for } cor(x_i, x_j) > 0$$

$$a_{ij} = 0 \text{ for } cor(x_i, x_j) \leq 0$$

Adjacency matrices are called "hybrid-signed" because they use a combination of hard and soft thresholding. A hard threshold is used for correlation values  $\leq 0$  and a soft threshold for values above 0. The parameter  $\beta$  is selected such that the resulting adjacency matrix fits a power-law distribution by using the pickSoftThreshold function implemented in the package. Adjacency matrices.  $A = \{a_{ij}\}$  have the following properties:

$$a_{ij} = a_{ji}$$

$$0 \leq a_{ij} \leq 1$$

$$a_{ii} = 1$$

The next step involves the transformation of adjacency matrices into topological overlap matrices using the following equation:

$$TOM_{ij}(A) = \frac{\sum_{k \neq i,j} a_{ik}a_{kj} + a_{ij}}{\min(\sum_{k \neq i} a_{ik}, \sum_{k \neq j} a_{jk}) + 1 - a_{ij}}$$

The  $TOM_{ij}(A)$  matrix is also an adjacency matrix. The topological overlap of two genes reflects their similarity in terms of the commonality of the genes to which they are connected. The TOM leads to a more robust network and larger modules which satisfies the same properties than  $A$ . Using the resulting topological overlap matrices derived from each individual dataset, a consensus TOM matrix was generated following the quantile method. For a set of  $K$  matrices  $TOM^{(1)}, TOM^{(2)}, \dots, TOM^{(k)}$ . A consensus adjacency matrix is constructed using the quantile method:

$$Quantile_{q,ij}(TOM^{(1)}, TOM^{(2)}, \dots, TOM^{(k)})$$

$$= Quantile_q(tom_{ij}^{(1)}, tom_{ij}^{(2)} \dots tom_{ij}^{(k)})$$

The consensus TOM was defined as the consensus of the individual TOM matrices with percentile  $q = 0.25$ . In the consensus TOM. Two variables are connected with the strength that is common to all input networks. Finally, a dissimilarity matrix based on the consensus TOM matrix is fed as an input for the dynamic tree-cutting algorithm, which identifies co-expressed gene clusters (consensus modules). The steps described above were carried out using the blockwiseConsensusModules with the following parameters set to  $maxBlockSize = 30000$ ,  $corType = "bicor"$ ,  $networkType = "signed hybrid"$ ,  $deepSplit = 3$ ,  $mergeCutHeight = 0.25$ , and  $consensusQuantile = 0.25$ ). By default, WGCNA assigns a color as a name for each identified co-expression module. To be able to discriminate between modules named with the same color in different disorders we added the disease abbreviation to all modules identified for a particular disease. Once the consensus modules were identified, each module's eigengenes were computed, and correlations between them and disease status were calculated. A module eigengene is defined as the first principal component of the expression matrix of the genes included in a specific module. It typically explains more than 50% of the module expressions' variance [18]. Significant positive correlations between disease status and a particular module eigengene suggest that genes placed at that particular module tend to be upregulated in cases compared to controls. In contrast, significant negative correlations have the opposite implication (the genes places in the module tend to be downregulated in disease samples compared to controls).

### 1.9. Module-module overlap analyses

Genes contained in all modules significantly correlated to disease status were identified for all the included disorders. Then, associations between modules of co-expressed genes significantly correlated with disease status were computed for all possible pairwise comparisons through Fisher's exact tests. The p-values of all pairwise module-gene overlap analyses were adjusted for multiple comparisons by FDR.

### 1.10. Functional and cell type-specific enrichment analyses

Diverse functional analysis methods and sources for sets of genes were used in the different sections. Classic overrepresentation analysis

was carried out to compute enrichment in gene ontology (GO) terms for the genes placed at the intersections observed in the intersection analyses and for genes placed in the detected consensus co-expression modules using the clusterProfiler [19] and anRICHment [20] R packages. In the case of the overrepresentation analyses carried out using the genes placed at the overlaps in the intersection analyses, the joint set of genes included in the meta-analyses of both disorders of each given pair was selected as background. For the overrepresentation analyses of genes placed at the identified gene consensus co-expression modules the background was defined as the set of genes jointly included in all the studies including data for a specific disorder. Gene Set Enrichment Analysis (GSEA) was used to identify upregulated and downregulated pathways in each disorder using as an input the list of genes ordered by its Z-score obtained by Choi's differential gene expression meta-analysis. GSEA analyses were carried out using the fGSEA package implementation [21]. The sets of genes were retrieved from the molecular signatures database (MSigDB) [22] and included the hallmarks (H) set of genes, the canonical pathways subset (C2:CP) of the C2 curated set of genes, and the Gene Ontology (C5) set of genes. Finally, enrichment in cell type-specific genetic markers was carried out for each detected consensus module using a collection of cell-specific gene markers derived from PanglaoDB database and hypergeometric tests. This database contains a list of gene expression markers used to define 154 cell types. The obtained p-values were corrected for multiple comparisons using the false discovery rate (FRD) method.

#### *1.11. Sources of human protein-protein/gene-gene interaction data.*

##### *1.11.1. Interactome 1*

We constructed a human interactome by integrating different sources of protein-protein and gene-gene interactions, including protein-protein interactions (PPI), gene co-expression data, information regarding protein complexes, data from transcription factors and their targets, and associations between genes participating in successive steps of metabolic pathways.

**Binary PPIs:** PPIs data was derived from the Human Reference Interactome (HuRI) [23]. HuRI is an initiative of the Center for Cancer System Biology at Dana-Farber Cancer Institute, which interrogated all pairwise combinations of human protein-coding genes to identify which are involved in binary protein-protein interactions [24] using yeast two-hybrid (Y2H) screenings.

**Co-expressed genes identification:** Co-expression partners were identified using data derived from the Genotype-Tissue Expression (GTEx) [25], which contains gene expression datasets derived from multiple healthy human tissues. Twenty-six of them (adipose tissue, adrenal gland, blood, blood vessel, brain, breast, colon, esophagus, heart, liver, lung, muscle, nerve, ovary, pancreas, pituitary, prostate, salivary gland, skin, small intestine, spleen, stomach, testis, thyroid, uterus, and vagina) were represented by more than one hundred samples. Expression data (Transcripts Per Million Reads, TPM) and annotation files were downloaded for those tissues. Then we randomly selected 100 samples from each tissue and computed Pearson's correlations between all pairwise gene combinations'. We considered that two genes were co-expression partners if they presented values of correlation higher than 0.7 in at least 16 tissue types.

Human protein complexes: Data from human protein complexes was downloaded from The comprehensive resource of mammalian protein complexes (CORUM) [26]. Human complexes were selected, and self-interacting genes were removed from the data.

Transcription factor targets data: The transcription factor targets dataset (TRANSFAC) was selected [27, 28] and retrieved from the Harmonizome database [29].

Kinase-substrate interactions: Kinase substrate interactions were retrieved from PhosphoSitePlus [30], which gathers curated data from low and high-throughput phosphoproteomic studies.

Metabolic links: Data regarding metabolic links was obtained from The Kyoto Encyclopedia of Genes and Genomes (KEGG) [31]. In particular, the KEGG PATHWAYS database that includes information regarding genes and their associated pathways and cellular processes was employed. In this database, pathways are represented using graphs where nodes are molecules (protein and compounds), and edges represent nodes' relations. First, the list of KEGG's human metabolic pathways was retrieved, and KGML files, including them, were obtained using the retrieveKGML function from KEGGgraph package [32]. Then, the files were parsed using parseKGML2Graph function included in the same package. Graphs were transformed to adjacency matrices, from which and all pairwise gene-gene associations were extracted.

#### 1.11.2. Interactome 2

The second interactome was obtained from STRING [33]. STRING gathers information about known and predicted protein-protein interactions, including direct or physical interactions and indirect or functional associations. In short, we downloaded the subset of human interactions subset of STRING. The database provides a score ranging from 0 to 1 that informs about the strength of each association's evidence. Only the high-quality associations (those presenting a quality score higher than 0.7) were selected.

#### 1.11.3. Interactome 3

The third interactome was derived from BioGRID [34]. BioGRID includes interaction data compiled through comprehensive curation efforts. We selected all human interactions included in the BioGRID database.

#### 1.12. Sources of disease-associated genes and variants

Sets of genes and variant-genes linked to each studied disorder were extracted from the following repositories. Disease-associated genes were retrieved from DisGeNet [35]. This database gathers information from different sources, including curated data from UniProt, the Comparative Toxicogenomics Database (CTD), Orphanet, the Clinical Genome Resource (CLINGEN), Genomics England, The Cancer Genome Interpreter (CGI), and the Psychiatric disorders Gene association Network (PsyGeNET), as well as, sources of non-curated data. For each disease-gene association, DisGeNet provides a quality score that informs about the evidence supporting it. We excluded not-curated, literature-derived, and animal model-obtained association. Variants associated with each disease were retrieved from The Phenotype Genotype Integrator (PheGenI) [36], which contains information derived from the GWAS catalog, dbGaP, and



dbSNP, among others. Genes mapped to each variant (henceforth variant genes) were selected and used for subsequent analysis. Finally, the eD-GAR database [37], which collects information from OMIM, Humvar, and ClinVar was also queried. Each included database employs its own dictionaries to identify phenotypes. For each disorder, two lists of disease-associated genes (stringent and relaxed) were created based on the use of two different thresholds for both the DisGeNET association quality score and the p-value associated with the variants linked to disease. The stringent sets were selected using a threshold of 0.6 for DisGeNET quality score and p-values lower than  $1e-10$ . **Supplementary Table 23** shows the identifiers employed to select disease-associated genes and variant genes and the list of disease-associated variants and variant-genes for each disorder under the stringent setting. **Supplementary Table 24** provides the list of disease-associated genes and variant genes obtained under the relaxed selection setting. for the disease variant associations reported in PheGenI. In the case of the relaxed sets, the thresholds were 0.3 and  $1e-08$ . The threshold selection was found to be a large but uneven impact on the number of included disease-associated genes.

### 1.13. Measures of network localization and statistical significance

For each set of disease-related genes and gene-variants, we computed two network localization measures to determine the degree to which disease proteins aggregate in specific areas of the interactome.

The first measure, termed as the intra-disease average distance  $\langle d_{AA} \rangle$ , was computed as follows. Let  $N$  be a set containing the disease-associated genes and variant genes for a particular disorder. For each element  $n$  in  $N$  the interactome distance to the next closest element of the set is determined. Then, the average of all shortest distances computed for all the elements of  $N$  is computed. Note that the shortest distance is defined as the shortest path between a given pair of nodes (i.e., the lowest number of edges that separate a pair of specific nodes in the network).

To assess the computed intra-disease average distances' significance, we randomly selected 10000 sets of genes of the same size as the original set. The degree distribution of the genes placed at a given disease-associated gene list impacts the computed distances' values. Therefore, we should account for the degrees observed in the original gene set's genes for the randomization process to be accurate.

Given the scale-free topology of human interactomes, low degree nodes are much more abundant than high degree nodes. We grouped nodes within a certain degree interval together to avoid choosing the same high degree nodes repeatedly in the degree-preserving random sampling analysis. Let  $V$  be the set of nodes in the interactome and  $u$  a particular element of  $V$  such that  $u \in V$  and let  $k_u$  be the set of all nodes with degree  $u$  and  $B_{i,j}$  the bin containing the nodes with degree equal or higher than  $i$  and lower than  $j$ . Nodes, with an increasing degree value are included in each bin such that it has at least 100 elements. Therefore, each bin will contain nodes such that,  $B_{i,j} = \{u \in V \mid i \leq k_u < j\}$  such that  $|B_{i,j}| \geq 100$ . Once the bins have been created, the random sampling strategy proceeds as follows. The degree in the reference interactome of each gene in the original gene set is determined. Then, for each gene, a random gene is selected from the degree-matched bin. This is repeated for all genes in the studied set. The result is a randomly

selected set of genes presenting the same size than the original set and an approximately equivalent degree distribution.

The original intra-disease average distance is then compared to the resulting random distribution of intra-disease average distances.  $d^{rand}$  as follows:

$$z_{score}(d) \equiv \frac{d_{AA} - \langle d^{rand} \rangle}{\sigma(d^{rand})}$$

Finally, one-tailed p-values are computed by comparing the obtained z-scores to the standard normal distribution.

The second measure, termed module size  $S$  represents the largest connected component produced by a particular set of disease-associated proteins in the human interactome (i.e., the highest number of disease proteins directly connected to one another). A random distribution of module sizes  $S^{rand}$  was then generated using the same random degree-preserving strategy described for the intra-disease average measures. Z-scores and p-values were also computed using the same methodology.

#### 1.14. Network-based separation between pairs of disorders

The following equation shows the network-based overlap measure proposed by Menche and co-workers [38].

$$S_{AB} = \langle d_{AB} \rangle - \frac{\langle d_{AA} \rangle + \langle d_{BB} \rangle}{2}$$

$S_{AB}$  compares the shortest distances between proteins within each disease  $\langle d_{AA} \rangle$  and  $\langle d_{BB} \rangle$ , to the shortest distances  $\langle d_{AB} \rangle$  between A-B protein pairs. Proteins associated to both A and B have  $d_{AB} = 0$ . Positive values of  $S_{AB}$  indicated separation between disease modules, whereas negative values suggest disease-disease overlaps. A null distribution of  $S_{AB}$  values  $S_{AB}^{rand}$  was used to compute the significance of the observed overlaps following the same degree preserving strategy described in the previous section. Z-scores and p-values were computed likewise.

#### 1.15. Cross-trait LD score regression

GWAS summary statistics for the studied disorders were searched in public repositories (GWAS catalog) or directly requested to the authors. We were able to retrieve GWAS summary statistics for all the CNS disorders except for HD. Since HD is a monogenic disease, no genome-wide association studies have been carried out for it. GWAS summary statistics for a subset of the studied cancers were also obtained, including prostate cancer, breast cancer, cervical cancer, colorectal cancer, ovarian cancer, endometrial cancer, thyroid cancer, skin cancer melanoma, and lung cancer.

In order to generate the appropriate files to compute genetic correlations, GWAS summary statistic files were preprocessed using custom scripts in R and the `munge_sumstats.py` function from the `ldsc` python package. Note that `ldsc` interprets the A1 field as the effect allele. In other words, it assumes that the sign of the reported summary statistics (beta values, odds ratios, or log-odds ratios) are oriented in reference to the A1 allele.

Heritability estimates were computed for all disorders. Then disease-disease correlations were computed for those disease pairs that showed individually significant heritabilities.

Cross-trait LD score is a method for estimating genetic correlations from GWAS summary statistics data [39]. It is based on the idea that

GWAS effect-sizes estimates for a given SNP partially incorporate the effects of all SNPs in linkage disequilibrium (LD) with that SNP. For a polygenic trait, SNPs with high LD will have higher  $X^2$  statistics on average than SNPs with low LD. A similar relationship holds if we replace the  $X^2$  statistics of a single study with the product of z-scores from two studies of traits with non-zero genetic correlation.

Under a polygenic model, the expected value of  $z_{1j}z_{2j}$  is defined by the following equation:

$$E[z_{1j}z_{2j}] = \frac{\sqrt{N_1 N_2} \rho_g}{M} l_j + \frac{\rho N_s}{\sqrt{N_1 N_2}}$$

Where  $N_1$  is the sample size of study one,  $N_2$  is the sample size of study two,  $\rho_g$  is the genetic covariance.  $l_j$  is the LD score of a particular SNP,  $N_s$  is the number of included SNPs in both studies, and  $\rho$  is the phenotypic correlation among the  $N_s$  overlapping samples. This setting allows estimating genetic covariance between two traits by identifying the slope from the regression of  $z_{1j}z_{2j}$  on LD score. Sample overlap only affects the intercept of the regression because sample overlap creates spurious correlations between  $z_{1j}$  and  $z_{2j}$  but does not depend on LD score.

Then normalizing the genetic covariance by the SNP-heritability yields genetic correlation.

$$r_g := \frac{\rho_g}{\sqrt{h_1^2 h_2^2}}$$

Where  $h_1^2$  the SNP-heritability of study one and  $h_2^2$  is the study heritability from study two.

#### 1.16. Sources of GWAS summary statistics data

GWAS summary statistics were obtained from different sources, including the GWAS summary statistics section of the GWAS catalog [40] and the UK biobank [41]. GWAS summary statistics for PD and SKCM were directly requested to the 23andME and Genomel consortia. Only studies that tested more than 450000 variants and included at least 5000 individuals between cases and controls derived from European ancestry populations were selected. Precomputed LD scores of individuals with European ancestry derived from the 1000 Genomes project were used in the analyses.

#### 1.17. Drug indications and LINCS L1000 analyses

##### 1.17.1. Drug indications

Drug indications for each of the included disorders were obtained from MEDI-an [42]. MEDI-an is a medication indication repository that gathers information from multiple resources including, RxNorm, MedlinePlus, and SIDER2) constructed using combining ontology-based and natural language processing (NLP) techniques. We selected the MEDI high precision subset (MEDI-HPS), which contains 13400 unique indications regarding 2136 medications. The file (MEDI\_HPS.csv) was downloaded from the site, and indications for all the studied CNS disorders and cancer types were selected by inspecting disease names and ICD codes. MEDI-HPS uses concept ids CUI IDs derived from the UMLS thesaurus to identify each available drug. Rxcui IDs were translated to Drugbank IDs using the restful web API from RxNav [43] through the use of the R packages httr [44] and rjson [45].

### 1.17.2. Differential expression profiles of cell lines treated with the indicated drugs

The differential gene expression profiles of cell lines treated with drugs indicated for the treatment of AD, PD, and the studied cancers were retrieved from LINCS L1000. LINCS L1000 contains an extensive collection of gene expression profiles generated using thousands of perturbagens (i.e., small molecules, ligands, micro-environments, CRISPR gene over-expression, and knockdown perturbations) and different cell lines, doses, and exposure times. Datasets from phases I (GSE92742) and II (GSE70138) of the project were downloaded from GEO. LINCS's perturbation IDs were mapped to Drugbank IDs through Inchi keys using the UnChem RESTful service [46]. All analyses were carried out using LINCS L1000 Level 5 data, which includes differential gene expression signatures computed by comparing three technical replicates of the same perturbation to appropriate controls. In Level 5 datasets, each perturbation (drug treatment) is represented by several differential gene expression signatures generated by treating different cell lines at different times and concentrations. We constructed an individual signature for each drug by combining all the available signatures generated using it, applying Stouffer's method.

For each signature, weights were computed as the average correlation to all other signatures. Then a consensus signature was created using the following formula applied to each gene.

$$Z \sim \frac{\sum_{i=1}^k w_i Z_i}{\sqrt{\sum_{i=1}^k w_i^2}}$$

Where  $w_i$  is the weight of the  $i$ -th signature and  $Z_i$  is the differential expression value of a particular gene in the  $i$ -th signature. Finally, Pearson's correlations between each disease signature and all drug consensus signatures were computed.

**Table S1.** Study characteristics for all included disorders. Platform.

| Disease | Study ID          | Year | Platform | Initial # Samples | Total # Samples | # Cases | # Controls | QC SMR | Included |
|---------|-------------------|------|----------|-------------------|-----------------|---------|------------|--------|----------|
| AD      | GSE1297           | 2004 | 1        | 31                | 31              | 22      | 9          | 5.12   | Yes      |
| AD      | GSE5281           | 2006 | 2        | 161               | 23              | 10      | 13         | 4.75   | Yes      |
| AD      | E_MEXP_2<br>280 [ | 2010 | 2        | 31                | 12              | 7       | 5          | 2.88   | Yes      |
| AD      | GSE36980          | 2013 | 3        | 79                | 17              | 7       | 10         | 3.75   | Yes      |
| AD      | GSE29378          | 2013 | 4        | 63                | 27              | 15      | 12         | 5.38   | Yes      |
| AD      | GSE48350          | 2014 | 2        | 253               | 61              | 19      | 42         | 1.38   | Yes      |
| AD      | GSE84422          | 2016 | 2        | 2004              | 55              | 44      | 11         | 4.75   | Yes      |
| PD      | GSE7621           | 2007 | 2        | 25                | 25              | 16      | 9          | 3      | Yes      |
| PD      | GSE8397           | 2008 | 1        | 94                | 38              | 24      | 14         | 1.88   | Yes      |
| PD      | E_MEXP_1<br>416   | 2008 | 5        | 16                | 16              | 8       | 8          | 7.5    | No       |
| PD      | GSE20141          | 2010 | 2        | 18                | 17              | 9       | 8          | 6.75   | Yes      |
| PD      | GSE20163          | 2010 | 1        | 17                | 17              | 8       | 9          | 5.88   | Yes      |
| PD      | GSE20164          | 2010 | 1        | 11                | 11              | 6       | 5          | 8      | No       |
| PD      | GSE20295          | 2010 | 1        | 93                | 29              | 11      | 18         | 4.5    | Yes      |
| PD      | GSE20159          | 2011 | 4        | 33                | 33              | 16      | 17         | 7.62   | No       |
| PD      | GSE49036          | 2013 | 2        | 28                | 23              | 15      | 8          | 5.25   | Yes      |
| PD      | GSE54282          | 2014 | 3        | 33                | 6               | 3       | 3          | 8.38   | No       |
| PD      | GSE24378          | NA   | 5        | 17                | 17              | 8       | 9          | 7.25   | No       |
| ALL     | GSE13204          | 2009 | 2        | 3248              | 824             | 750     | 74         | 1.88   | Yes      |
| ALL     | GSE26713          | 2011 | 2        | 124               | 124             | 117     | 7          | 2.38   | Yes      |
| ALL     | GSE28497          | 2011 | 1        | 288               | 288             | 284     | 4          | 3.38   | Yes      |
| ALL     | GSE46170          | 2013 | 2        | 38                | 38              | 32      | 6          | 3.75   | Yes      |
| ALL     | GSE79533          | 2017 | 2        | 226               | 226             | 223     | 3          | 3.62   | Yes      |
| AML     | GSE12662          | 2008 | 2        | 106               | 81              | 76      | 5          | 5.75   | Yes      |
| AML     | GSE13204          | 2009 | 2        | 3248              | 574             | 501     | 73         | 2.88   | Yes      |
| AML     | GSE30029          | 2011 | 4        | 121               | 121             | 90      | 31         | 3.38   | Yes      |
| AML     | GSE34577          | 2011 | 4        | 89                | 75              | 57      | 18         | 3.88   | Yes      |
| AML     | GSE48558          | 2013 | 3        | 170               | 21              | 18      | 3          | 5.88   | Yes      |

|       |                 |      |   |     |     |     |     |      |     |
|-------|-----------------|------|---|-----|-----|-----|-----|------|-----|
| AML   | GSE67936        | 2015 | 6 | 168 | 168 | 150 | 18  | 4.88 | Yes |
| AML   | GSE68172        | 2015 | 2 | 77  | 15  | 10  | 5   | 8.25 | No  |
| AML   | GSE63270        | 2016 | 2 | 104 | 104 | 42  | 62  | 3.62 | Yes |
| AML   | GSE76340        | 2016 | 4 | 166 | 18  | 15  | 3   | 6.5  | Yes |
| BLCA  | GSE7476         | 2007 | 2 | 12  | 12  | 9   | 3   | 1.88 | Yes |
| BLCA  | GSE13507        | 2008 | 7 | 256 | 84  | 75  | 9   | 3.5  | Yes |
| BLCA  | GSE52519        | 2013 | 8 | 12  | 8   | 5   | 3   | 3.38 | Yes |
| BLCA  | GSE38264        | 2014 | 3 | 51  | 38  | 28  | 10  | 2.25 | Yes |
| BLCA  | E_MTAB_1<br>940 | 2015 | 2 | 86  | 86  | 82  | 4   | 4    | Yes |
| BRCA  | GSE7904         | 2007 | 2 | 62  | 47  | 40  | 7   | 6.12 | Yes |
| BRCA  | GSE10780        | 2009 | 2 | 185 | 185 | 42  | 143 | 3.62 | Yes |
| BRCA  | GSE10810        | 2009 | 2 | 58  | 58  | 31  | 27  | 2.38 | Yes |
| BRCA  | GSE29431        | 2011 | 2 | 66  | 54  | 44  | 10  | 4.38 | Yes |
| BRCA  | GSE31448        | 2011 | 2 | 357 | 356 | 352 | 4   | 3.88 | Yes |
| BRCA  | GSE42568        | 2013 | 2 | 121 | 114 | 98  | 16  | 3.12 | Yes |
| BRCA  | GSE54002        | 2014 | 2 | 433 | 433 | 417 | 16  | 6.12 | Yes |
| BRCA  | GSE45827        | 2016 | 2 | 155 | 149 | 140 | 9   | 6.38 | Yes |
| BRNCA | GSE4290         | 2006 | 2 | 180 | 176 | 153 | 23  | 3.25 | Yes |
| BRNCA | GSE9385         | 2008 | 9 | 55  | 55  | 49  | 6   | 4.5  | Yes |
| BRNCA | GSE16011        | 2010 | 2 | 284 | 278 | 270 | 8   | 2.25 | Yes |
| BRNCA | GSE21354        | 2010 | 2 | 18  | 18  | 14  | 4   | 9    | No  |
| BRNCA | GSE15824        | 2011 | 2 | 45  | 32  | 27  | 5   | 7.12 | No  |
| BRNCA | GSE42656        | 2013 | 4 | 73  | 55  | 44  | 11  | 6.5  | Yes |
| BRNCA | GSE44971        | 2013 | 2 | 58  | 58  | 49  | 9   | 7.5  | No  |
| BRNCA | GSE50161        | 2013 | 2 | 130 | 128 | 115 | 13  | 4.75 | Yes |
| BRNCA | GSE68848        | 2015 | 2 | 580 | 482 | 454 | 28  | 3.5  | Yes |
| BRNCA | GSE74195        | 2015 | 2 | 51  | 44  | 39  | 5   | 6.62 | Yes |
| CERV  | GSE6791         | 2007 | 2 | 84  | 28  | 20  | 8   | 3.75 | Yes |
| CERV  | GSE39001        | 2013 | 3 | 79  | 24  | 19  | 5   | 3.08 | Yes |
| CERV  | GSE63514        | 2015 | 2 | 128 | 52  | 28  | 24  | 1.67 | Yes |
| CERV  | GSE67522        | 2015 | 6 | 42  | 35  | 15  | 20  | 2.5  | Yes |

|              |          |      |    |      |     |     |     |       |     |
|--------------|----------|------|----|------|-----|-----|-----|-------|-----|
| <b>CHLCA</b> | GSE26566 | 2012 | 5  | 169  | 17  | 11  | 6   | 1.75  | Yes |
| <b>CHLCA</b> | GSE32879 | 2012 | 3  | 37   | 23  | 16  | 7   | 1.75  | Yes |
| <b>CHLCA</b> | GSE32225 | 2013 | 1  | 155  | 88  | 83  | 5   | 3.38  | Yes |
| <b>CHLCA</b> | GSE22633 | 2014 | 7  | 63   | 24  | 20  | 4   | 3.12  | Yes |
| <b>CLL</b>   | GSE13204 | 2009 | 2  | 3248 | 522 | 448 | 74  | 2     | Yes |
| <b>CLL</b>   | GSE13987 | 2009 | 2  | 24   | 8   | 4   | 4   | 3.62  | Yes |
| <b>CLL</b>   | GSE26725 | 2011 | 2  | 17   | 17  | 12  | 5   | 5     | Yes |
| <b>CLL</b>   | GSE31048 | 2013 | 2  | 221  | 221 | 188 | 33  | 4.25  | Yes |
| <b>CLL</b>   | GSE51528 | 2015 | 3  | 2299 | 229 | 217 | 12  | 3.12  | Yes |
| <b>CLL</b>   | GSE67640 | 2017 | 6  | 24   | 24  | 15  | 9   | 3     | Yes |
| <b>CML</b>   | GSE13204 | 2009 | 2  | 3248 | 139 | 66  | 73  | 1.88  | Yes |
| <b>CML</b>   | GSE43754 | 2013 | 9  | 20   | 20  | 10  | 10  | 2     | Yes |
| <b>CML</b>   | GSE47927 | 2013 | 3  | 67   | 67  | 52  | 15  | 2.12  | Yes |
| <b>CRCA</b>  | GSE9348  | 2007 | 2  | 82   | 82  | 70  | 12  | 4.88  | Yes |
| <b>CRCA</b>  | GSE18105 | 2010 | 2  | 111  | 94  | 77  | 17  | 11.38 | No  |
| <b>CRCA</b>  | GSE20916 | 2010 | 2  | 145  | 105 | 81  | 24  | 5.12  | Yes |
| <b>CRCA</b>  | GSE24550 | 2011 | 9  | 167  | 90  | 77  | 13  | 13.25 | No  |
| <b>CRCA</b>  | GSE31279 | 2011 | 5  | 110  | 53  | 30  | 23  | 8.38  | No  |
| <b>CRCA</b>  | GSE33113 | 2011 | 2  | 96   | 96  | 90  | 6   | 9.38  | No  |
| <b>CRCA</b>  | GSE31737 | 2012 | 9  | 80   | 80  | 40  | 40  | 6.62  | Yes |
| <b>CRCA</b>  | GSE37182 | 2013 | 4  | 172  | 168 | 84  | 84  | 8.62  | No  |
| <b>CRCA</b>  | GSE37364 | 2013 | 2  | 94   | 52  | 14  | 38  | 4.62  | Yes |
| <b>CRCA</b>  | GSE39582 | 2013 | 2  | 585  | 585 | 566 | 19  | 5.62  | Yes |
| <b>CRCA</b>  | GSE35834 | 2014 | 9  | 158  | 53  | 30  | 23  | 9     | No  |
| <b>CRCA</b>  | GSE44076 | 2014 | 10 | 246  | 246 | 98  | 148 | 5.38  | Yes |
| <b>CRCA</b>  | GSE41657 | 2015 | 11 | 88   | 37  | 25  | 12  | 10.88 | No  |
| <b>CRCA</b>  | GSE62932 | 2015 | 2  | 68   | 68  | 64  | 4   | 10.25 | No  |
| <b>CRCA</b>  | GSE71187 | 2017 | 11 | 189  | 111 | 99  | 12  | 6.62  | Yes |
| <b>DLBCL</b> | GSE12453 | 2008 | 2  | 67   | 36  | 11  | 25  | 1.88  | Yes |
| <b>DLBCL</b> | GSE12195 | 2009 | 2  | 136  | 88  | 73  | 15  | 2     | Yes |
| <b>DLBCL</b> | GSE56315 | 2015 | 2  | 122  | 122 | 89  | 33  | 2.12  | Yes |

|        |          |      |    |     |     |     |     |      |     |
|--------|----------|------|----|-----|-----|-----|-----|------|-----|
| FLYMPH | GSE12453 | 2008 | 2  | 67  | 30  | 5   | 25  | 4.62 | Yes |
| FLYMPH | GSE12195 | 2009 | 2  | 136 | 53  | 38  | 15  | 2.25 | Yes |
| FLYMPH | GSE14214 | 2011 | 12 | 13  | 12  | 9   | 3   | 4.62 | Yes |
| FLYMPH | GSE48047 | 2014 | 13 | 55  | 26  | 18  | 8   | 4.12 | Yes |
| FLYMPH | GSE55267 | 2014 | 2  | 69  | 69  | 63  | 6   | 2.62 | Yes |
| FLYMPH | GSE65135 | 2015 | 2  | 28  | 24  | 14  | 10  | 2.75 | Yes |
| HANC   | GSE9844  | 2008 | 2  | 38  | 38  | 26  | 12  | 3.12 | Yes |
| HANC   | GSE23558 | 2011 | 12 | 32  | 28  | 23  | 5   | 4.62 | Yes |
| HANC   | GSE25099 | 2011 | 9  | 79  | 79  | 57  | 22  | 5    | Yes |
| HANC   | GSE30784 | 2011 | 2  | 229 | 212 | 167 | 45  | 2.12 | Yes |
| HANC   | GSE34105 | 2012 | 14 | 78  | 57  | 49  | 8   | 9    | Yes |
| HANC   | GSE29330 | 2014 | 2  | 18  | 18  | 13  | 5   | 4.25 | Yes |
| HANC   | GSE55550 | 2014 | 15 | 155 | 86  | 73  | 13  | 6.12 | Yes |
| HANC   | GSE59102 | 2014 | 11 | 42  | 32  | 23  | 9   | 4    | Yes |
| HANC   | GSE75538 | 2016 | 14 | 28  | 10  | 5   | 5   | 6.75 | Yes |
| KDNCA  | GSE11024 | 2008 | 2  | 79  | 22  | 10  | 12  | 6.38 | Yes |
| KDNCA  | GSE17895 | 2010 | 2  | 160 | 157 | 135 | 22  | 6.88 | Yes |
| KDNCA  | GSE36895 | 2012 | 2  | 76  | 52  | 29  | 23  | 2.62 | Yes |
| KDNCA  | GSE40435 | 2013 | 6  | 202 | 202 | 101 | 101 | 4.88 | Yes |
| KDNCA  | GSE47032 | 2013 | 9  | 40  | 20  | 10  | 10  | 5.12 | Yes |
| KDNCA  | GSE46699 | 2014 | 2  | 130 | 94  | 49  | 45  | 4.62 | Yes |
| KDNCA  | GSE76351 | 2015 | 16 | 24  | 24  | 12  | 12  | 7.62 | No  |
| KDNCA  | GSE66272 | 2016 | 2  | 54  | 54  | 27  | 27  | 3.38 | Yes |
| KDNCA  | GSE68417 | 2016 | 3  | 49  | 49  | 35  | 14  | 6.38 | Yes |
| KDNCA  | GSE71963 | 2016 | 11 | 48  | 48  | 32  | 16  | 7.12 | No  |
| LGCA   | GSE12236 | 2008 | 9  | 40  | 40  | 20  | 20  | 8.25 | No  |
| LGCA   | GSE18842 | 2010 | 2  | 91  | 91  | 46  | 45  | 7    | No  |
| LGCA   | GSE19188 | 2010 | 2  | 156 | 156 | 91  | 65  | 3.38 | Yes |
| LGCA   | GSE19804 | 2011 | 2  | 120 | 120 | 60  | 60  | 5.12 | Yes |
| LGCA   | GSE31210 | 2011 | 2  | 246 | 246 | 226 | 20  | 6.88 | Yes |
| LGCA   | GSE31552 | 2011 | 3  | 131 | 75  | 43  | 32  | 9.88 | No  |



|       |           |      |    |     |     |     |     |       |     |
|-------|-----------|------|----|-----|-----|-----|-----|-------|-----|
| LGCA  | GSE32863  | 2012 | 16 | 116 | 87  | 33  | 54  | 7.12  | No  |
| LGCA  | GSE40275  | 2012 | 9  | 10  | 72  | 29  | 43  | 11.38 | No  |
| LGCA  | GSE30219  | 2013 | 2  | 307 | 307 | 293 | 14  | 8.12  | No  |
| LGCA  | GSE40791  | 2013 | 2  | 194 | 194 | 94  | 100 | 3.38  | Yes |
| LGCA  | GSE32665  | 2013 | 7  | 179 | 170 | 81  | 89  | 10.88 | No  |
| LGCA  | GSE43458  | 2013 | 3  | 110 | 110 | 80  | 30  | 9.62  | No  |
| LGCA  | GSE33532  | 2014 | 2  | 100 | 34  | 14  | 20  | 8.38  | No  |
| LGCA  | GSE75037  | 2016 | 8  | 134 | 134 | 51  | 83  | 5.62  | Yes |
| LIVCA | GSE6764   | 2007 | 2  | 75  | 75  | 65  | 10  | 7.12  | No  |
| LIVCA | GSE17967  | 2009 | 1  | 63  | 63  | 16  | 47  | 10.25 | No  |
| LIVCA | GSE12941  | 2010 | 9  | 20  | 20  | 10  | 10  | 8     | No  |
| LIVCA | GSE36376  | 2012 | 6  | 433 | 273 | 80  | 193 | 5.88  | Yes |
| LIVCA | GSE50579  | 2013 | 13 | 80  | 34  | 26  | 8   | 9.12  | No  |
| LIVCA | GSE41804] | 2013 | 2  | 40  | 40  | 20  | 20  | 5.12  | Yes |
| LIVCA | GSE17548  | 2013 | 2  | 37  | 37  | 17  | 20  | 6.88  | Yes |
| LIVCA | GSE54236  | 2014 | 11 | 161 | 133 | 55  | 78  | 6.38  | Yes |
| LIVCA | GSE55092  | 2014 | 2  | 140 | 44  | 20  | 24  | 4.38  | Yes |
| LIVCA | GSE62232  | 2014 | 2  | 91  | 86  | 81  | 5   | 6.12  | Yes |
| LIVCA | GSE76427  | 2015 | 6  | 167 | 101 | 50  | 51  | 5.12  | Yes |
| LIVCA | GSE64041  | 2016 | 3  | 44  | 125 | 60  | 65  | 3.62  | Yes |
| OVCA  | GSE10971  | 2008 | 2  | 37  | 37  | 13  | 24  | 3.62  | Yes |
| OVCA  | GSE14407  | 2009 | 2  | 24  | 19  | 7   | 12  | 4.12  | Yes |
| OVCA  | GSE36668  | 2012 | 2  | 12  | 12  | 8   | 4   | 3.38  | Yes |
| OVCA  | GSE40595  | 2014 | 2  | 77  | 75  | 61  | 14  | 2.38  | Yes |
| OVCA  | GSE69428  | 2015 | 2  | 29  | 17  | 8   | 9   | 3.5   | Yes |
| OVCA  | GSE66957  | 2015 | 17 | 69  | 62  | 57  | 5   | 4     | Yes |
| PACA  | GSE15471  | 2009 | 2  | 78  | 72  | 36  | 36  | 4.38  | Yes |
| PACA  | GSE19650  | 2010 | 2  | 22  | 19  | 12  | 7   | 6.62  | Yes |
| PACA  | GSE32676  | 2011 | 2  | 32  | 32  | 25  | 7   | 5.62  | Yes |
| PACA  | GSE41368  | 2013 | 3  | 12  | 12  | 6   | 6   | 3.75  | Yes |
| PACA  | GSE43795  | 2013 | 6  | 31  | 11  | 6   | 5   | 6.12  | Yes |

|      |          |      |    |     |     |     |     |      |     |
|------|----------|------|----|-----|-----|-----|-----|------|-----|
| PACA | GSE55643 | 2014 | 11 | 53  | 21  | 18  | 3   | 6.75 | Yes |
| PACA | GSE62165 | 2016 | 10 | 131 | 131 | 118 | 13  | 2.38 | Yes |
| PACA | GSE62452 | 2016 | 3  | 130 | 130 | 69  | 61  | 2.88 | Yes |
| PACA | GSE63111 | 2017 | 9  | 35  | 35  | 28  | 7   | 6.5  | Yes |
| PRCA | GSE21034 | 2010 | 9  | 370 | 160 | 131 | 29  | 3.5  | Yes |
| PRCA | GSE29079 | 2011 | 10 | 95  | 95  | 47  | 48  | 5.12 | Yes |
| PRCA | GSE62872 | 2014 | 3  | 424 | 424 | 264 | 160 | 2.38 | Yes |
| PRCA | GSE46602 | 2015 | 2  | 50  | 50  | 36  | 14  | 4.12 | Yes |
| PRCA | GSE70768 | 2015 | 6  | 199 | 199 | 125 | 74  | 3.12 | Yes |
| PRCA | GSE71016 | 2016 | 15 | 95  | 91  | 45  | 46  | 2.75 | Yes |
| SKCM | GSE3189  | 2005 | 1  | 70  | 69  | 44  | 25  | 3.75 | Yes |
| SKCM | GSE7553  | 2008 | 2  | 87  | 18  | 14  | 4   | 3.12 | Yes |
| SKCM | GSE15605 | 2012 | 2  | 74  | 62  | 46  | 16  | 2.38 | Yes |
| SKCM | GSE46517 | 2013 | 1  | 121 | 45  | 30  | 15  | 2    | Yes |
| SKCM | GSE57715 | 2014 | 18 | 297 | 292 | 275 | 17  | 3.75 | Yes |
| STCA | GSE13911 | 2008 | 2  | 69  | 69  | 38  | 31  | 3.88 | Yes |
| STCA | GSE13195 | 2009 | 9  | 100 | 50  | 25  | 25  | 4.5  | Yes |
| STCA | GSE27342 | 2011 | 9  | 160 | 146 | 73  | 73  | 5    | Yes |
| STCA | GSE29998 | 2012 | 4  | 99  | 99  | 50  | 49  | 4.12 | Yes |
| STCA | GSE30727 | 2014 | 9  | 60  | 60  | 30  | 30  | 4.5  | Yes |
| STCA | GSE51575 | 2014 | 13 | 52  | 36  | 15  | 21  | 6.25 | Yes |
| STCA | GSE26899 | 2016 | 4  | 108 | 52  | 41  | 11  | 5.88 | Yes |
| STCA | GSE79973 | 2016 | 2  | 20  | 20  | 10  | 10  | 4.88 | Yes |
| STCA | GSE54129 | 2017 | 2  | 132 | 132 | 111 | 21  | 6    | Yes |
| THCA | GSE3467  | 2005 | 2  | 18  | 18  | 9   | 9   | 2.75 | Yes |
| THCA | GSE53157 | 2013 | 2  | 27  | 27  | 24  | 3   | 4.5  | Yes |
| THCA | GSE35570 | 2015 | 2  | 116 | 116 | 65  | 51  | 1.75 | Yes |
| THCA | GSE60542 | 2015 | 2  | 92  | 59  | 29  | 30  | 2.62 | Yes |
| THCA | GSE65144 | 2015 | 2  | 25  | 25  | 12  | 13  | 3.38 | Yes |

Codes: 1- hgu133a, 2- hgu133plus2, 3- Human Gene 1.0 ST, 4- Illumina HumanHT-12 V3.0, 5- Illumina humanRef-8 v2.0, 5- Affymetrix Human X3P Array, 6- Illumina HumanHT-12 V4.0, 7-Illumina human-6 v2.0 expression beadchip, 8- Illumina HumanWG-6 v3.0, 9- Affymetrix Human Exon 1.0 ST Array, 10- Affymetrix Human Genome U219 Array, 11- Agilent-014850 Whole Human Genome Microarray 4x44K G4112F, 12- Sentrix HumanRef-8 Expression Bead-Chip, 13-Agilent-028004 SurePrint G3 Human GE 8x60K Microarray, 14-Illumina HumanHT-12 WG-DASL V4.0, 15-

**Table S2.** Differential gene expression analysis results of TCGA datasets.

| TCGA Dataset | TCGA Dataset Description                                         | Correspondence to Array Analysis Abbreviations | N    | N° Cases | N° Controls | N° Tested Genes | N° DEGs | N° Up | N° Down |
|--------------|------------------------------------------------------------------|------------------------------------------------|------|----------|-------------|-----------------|---------|-------|---------|
| BLCA         | Bladder Urothelial Carcinoma                                     | BLCA                                           | 433  | 414      | 19          | 16251           | 9043    | 6045  | 2998    |
| BRCA         | Breast Invasive Carcinoma                                        | BRCA                                           | 1215 | 1102     | 113         | 16251           | 13665   | 9026  | 4639    |
| GBM          | Glioblastoma Multiforme                                          | BRNCA                                          | 161  | 156      | 5           | 16251           | 9187    | 5639  | 3548    |
| CESC         | Cervical Squamous Cell Carcinoma and Endocervical Adenocarcinoma | CERV                                           | 307  | 304      | 3           | 16251           | 4418    | 2407  | 2011    |
| CHOL         | Cholangiocarcinoma                                               | CHOL                                           | 45   | 36       | 9           | 16251           | 8989    | 6055  | 2934    |
| COAD         | Colon Adenocarcinoma                                             | CRCA                                           | 519  | 478      | 41          | 16250           | 12705   | 7938  | 4767    |
| READ         | Rectum Adenocarcinoma                                            | CRCA                                           | 176  | 166      | 10          | 16251           | 9481    | 5934  | 3547    |
| HNSC         | Head and Neck Squamous Cell Carcinoma                            | HANC                                           | 544  | 500      | 44          | 16251           | 11334   | 6668  | 4666    |
| KICH         | Kidney Chromophobe                                               | KDNCA                                          | 89   | 65       | 24          | 16251           | 11665   | 7257  | 4408    |
| KIRC         | Kidney Renal Clear Cell Carcinoma                                | KDNCA                                          | 610  | 538      | 72          | 16251           | 13291   | 7999  | 5292    |
| LUAD         | Lung Adenocarcinoma                                              | LGCA                                           | 592  | 533      | 59          | 16251           | 12834   | 8590  | 4244    |

|      |                                |       |     |     |    |       |       |      |      |
|------|--------------------------------|-------|-----|-----|----|-------|-------|------|------|
| LUSC | Lung Squamous Cell Carcinoma   | LGCA  | 551 | 502 | 49 | 16251 | 13367 | 8417 | 4950 |
| LIHC | Liver Hepatocellular Carcinoma | LIVCA | 421 | 371 | 50 | 16251 | 11597 | 8490 | 3107 |
| PAAD | Pancreatic Adenocarcinoma      | PACA  | 181 | 177 | 4  | 16251 | 842   | 94   | 748  |
| PRAD | Prostate Adenocarcinoma        | PRCA  | 550 | 498 | 52 | 16229 | 11644 | 7023 | 4621 |
| STAD | Stomach Adenocarcinoma         | STCA  | 407 | 375 | 32 | 16251 | 10306 | 5714 | 4592 |
| THCA | Thyroid Carcinoma              | THCA  | 560 | 502 | 58 | 16251 | 11638 | 6040 | 5598 |

**Table S3.** Jointly deregulated pathways in AD and BRNCA.

|       | Up_BRNCA                                                                                                                                                                                                                                                                                                                                                                                                                                                                                                                                                                                                                                                                                                                                                                                                                                                                                                                                                                                                                                                                                                                                                                                                                                                                                                                                                                                                                                                                                                                                                                                                                                                                                                                                                                                                                                                                                                                                                                                                                                                                                                                                                                                                                                                                                                                                                                                                                                                                                                                                                                                                                                                                                | Down_BRNCA                                                                         |
|-------|-----------------------------------------------------------------------------------------------------------------------------------------------------------------------------------------------------------------------------------------------------------------------------------------------------------------------------------------------------------------------------------------------------------------------------------------------------------------------------------------------------------------------------------------------------------------------------------------------------------------------------------------------------------------------------------------------------------------------------------------------------------------------------------------------------------------------------------------------------------------------------------------------------------------------------------------------------------------------------------------------------------------------------------------------------------------------------------------------------------------------------------------------------------------------------------------------------------------------------------------------------------------------------------------------------------------------------------------------------------------------------------------------------------------------------------------------------------------------------------------------------------------------------------------------------------------------------------------------------------------------------------------------------------------------------------------------------------------------------------------------------------------------------------------------------------------------------------------------------------------------------------------------------------------------------------------------------------------------------------------------------------------------------------------------------------------------------------------------------------------------------------------------------------------------------------------------------------------------------------------------------------------------------------------------------------------------------------------------------------------------------------------------------------------------------------------------------------------------------------------------------------------------------------------------------------------------------------------------------------------------------------------------------------------------------------------|------------------------------------------------------------------------------------|
| Up_AD | <p>(1) (H)K INFLAMMATORY RESPONSE, (2) (H)K EPITHELIAL MESENCHYMAL TRANSITION, (3) (H)K ALLOGRAFT REJECTION, (4) (H)K IL6 JAK STAT3 SIGNALING, (5) (H)K COAGULATION, (6) (H)K TNFA SIGNALING VIA NFKB, (7) (H)K IL2 STAT5 SIGNALING, (8) (K) CYTOKINE CYTOKINE RECEPTOR INTERACTION, (9) NABA CORE MATRISOME, (10) NABA MATRISOME, (11) (R) EXTRACELLULAR MATRIX ORGANIZATION, (12) (R) INTERLEUKIN 4 AND INTERLEUKIN 13 SIGNALING, (13) NABA ECM GLYCOPROTEINS, (14) (R) ELASTIC FIBRE FORMATION, (15) (R) COLLAGEN FORMATION, (16) (R) MOLECULES ASSOCIATED WITH ELASTIC FIBRES, (17) (K) ECM RECEPTOR INTERACTION, (18) (R) ECM PROTEOGLYCANS, (19) (R) ASSEMBLY OF COLLAGEN FIBRILS AND OTHER MULTIMERIC STRUCTURES, (20) (K) PATHWAYS IN CANCER, (21) (R) NON INTEGRIN MEMBRANE ECM INTERACTIONS, (22) (PID) INTEGRIN1 PATHWAY, (23) (R) INTEGRIN CELL SURFACE INTERACTIONS, (24) (R) DEGRADATION OF THE EXTRACELLULAR MATRIX, (25) (R) COLLAGEN DEGRADATION, (26) (R) SIGNALING BY INTERLEUKINS, (27) (K) GRAFT VERSUS HOST DISEASE, (28) (K) AUTOIMMUNE THYROID DISEASE, (29) (R) INTERLEUKIN 10 SIGNALING, (30) (GO) ADAPTIVE IMMUNE RESPONSE, (31) (GO) ANATOMICAL STRUCTURE FORMATION INVOLVED IN MORPHOGENESIS, (32) (GO) ANIMAL ORGAN MORPHOGENESIS, (33) (GO) BIOLOGICAL ADHESION, (34) (GO) BLOOD VESSEL MORPHOGENESIS, (35) (GO) CARDIOVASCULAR SYSTEM DEVELOPMENT, (36) (GO) CELL ACTIVATION, (37) (GO) CELL SURFACE, (38) (GO) CHROMATIN, (39) (GO) CHROMOSOME, (40) (GO) CIRCULATORY SYSTEM DEVELOPMENT, (41) (GO) CIS REGULATORY REGION BINDING, (42) (GO) COLLAGEN CONTAINING EXTRACELLULAR MATRIX, (43) (GO) CONNECTIVE TISSUE DEVELOPMENT, (44) (GO) CYTOKINE MEDIATED SIGNALING PATHWAY, (45) (GO) CYTOKINE PRODUCTION, (46) (GO) DEFENSE RESPONSE, (47) (GO) DOUBLE STRANDED DNA BINDING, (48) (GO) EMBRYO DEVELOPMENT, (49) (GO) EPITHELIUM DEVELOPMENT, (50) (GO) EXTRACELLULAR MATRIX, (51) (GO) EXTRACELLULAR MATRIX STRUCTURAL CONSTITUENT, (52) (GO) EXTRACELLULAR STRUCTURE ORGANIZATION, (53) (GO) IMMUNE SYSTEM DEVELOPMENT, (54) (GO) INFLAMMATORY RESPONSE, (55) (GO) LEUKOCYTE CELL CELL ADHESION, (56) (GO) LEUKOCYTE MIGRATION, (57) (GO) LEUKOCYTE PROLIFERATION, (58) (GO) LYMPHOCYTE ACTIVATION, (59) (GO) NEGATIVE REGULATION OF BIOSYNTHETIC PROCESS, (60) (GO) NEGATIVE REGULATION OF IMMUNE SYSTEM PROCESS, (61) (GO) NEGATIVE REGULATION OF NUCLEOBASE CONTAINING COMPOUND METABOLIC PROCESS, (62) (GO) NEGATIVE REGULATION OF RNA BIOSYNTHETIC PROCESS, (63) (GO) NEGATIVE REGULATION OF TRANSCRIPTION BY RNA POLYMERASE II, (64) (GO) NUCLEAR CHROMOSOME, (65) (GO) POSITIVE REGULATION OF CELLULAR BIOSYNTHETIC PROCESS, (66) (GO)</p> | <p>(1) (H)K KRAS SIGNALING DN, (2) (GO) INTRINSIC COMPONENT OF PLASMA MEMBRANE</p> |

POSITIVE REGULATION OF CELL POPULATION  
PROLIFERATION, (67) (GO) POSITIVE REGULATION OF  
IMMUNE SYSTEM PROCESS, (68) (GO) POSITIVE  
REGULATION OF NUCLEOBASE CONTAINING  
COMPOUND METABOLIC PROCESS, (69) (GO) POSITIVE  
REGULATION OF RNA METABOLIC PROCESS, (70) (GO)  
POSITIVE REGULATION OF TRANSCRIPTION BY RNA  
POLYMERASE II, (71) (GO) POSITIVE REGULATION OF  
VASCULATURE DEVELOPMENT, (72) (GO) REGULATION  
OF CELL ACTIVATION, (73) (GO) REGULATION OF CELL  
ADHESION, (74) (GO) REGULATION OF CELL  
POPULATION PROLIFERATION, (75) (GO) REGULATION  
OF IMMUNE SYSTEM PROCESS, (76) (GO) REGULATION  
OF LEUKOCYTE PROLIFERATION, (77) (GO)  
REGULATION OF LYMPHOCYTE ACTIVATION, (78) (GO)  
REGULATION OF VASCULATURE DEVELOPMENT, (79)  
(GO) RESPONSE TO BACTERIUM, (80) (GO) RESPONSE  
TO BIOTIC STIMULUS, (81) (GO) RESPONSE TO  
MOLECULE OF BACTERIAL ORIGIN, (82) (GO)  
RESPONSE TO WOUNDING, (83) (GO) SEQUENCE  
SPECIFIC DNA BINDING, (84) (GO) SEQUENCE SPECIFIC  
DOUBLE STRANDED DNA BINDING, (85) (GO)  
SKELETAL SYSTEM DEVELOPMENT, (86) (GO)  
SKELETAL SYSTEM MORPHOGENESIS, (87) (GO)  
TRANSCRIPTION REGULATOR ACTIVITY, (88) (GO)  
TUBE DEVELOPMENT, (89) (GO) TUBE  
MORPHOGENESIS, (90) (GO) T CELL ACTIVATION, (91)  
(GO) UROGENITAL SYSTEM DEVELOPMENT, (92) (GO)  
WOUND HEALING, (93) (GO) RENAL SYSTEM  
DEVELOPMENT, (94) (GO) CARTILAGE DEVELOPMENT,  
(95) (GO) T CELL DIFFERENTIATION, (96) (GO) POSITIVE  
REGULATION OF CELL ACTIVATION, (97) (GO)  
RESPONSE TO CYTOKINE, (98) (GO) REGULATION OF T  
CELL ACTIVATION, (99) (GO) REGULATION OF CELL  
CELL ADHESION, (100) (GO) POSITIVE REGULATION OF  
CELL ADHESION, (101) (GO) T CELL PROLIFERATION,  
(102) (GO) EMBRYO DEVELOPMENT ENDING IN BIRTH  
OR EGG HATCHING, (103) (GO) DEFENSE RESPONSE TO  
OTHER ORGANISM, (104) (GO) REGULATION OF  
IMMUNE RESPONSE, (105) (GO) REGULATION OF  
IMMUNE EFFECTOR PROCESS, (106) (GO) GLAND  
DEVELOPMENT, (107) (GO) TISSUE MORPHOGENESIS,  
(108) (GO) BRANCHING MORPHOGENESIS OF AN  
EPITHELIAL TUBE, (109) (GO) TUMOR NECROSIS  
FACTOR SUPERFAMILY CYTOKINE PRODUCTION, (110)  
(GO) CELLULAR RESPONSE TO BIOTIC STIMULUS, (111)  
(GO) POSITIVE REGULATION OF LEUKOCYTE CELL  
CELL ADHESION, (112) (GO) ADAPTIVE IMMUNE  
RESPONSE BASED ON SOMATIC RECOMBINATION OF  
IMMUNE RECEPTORS BUILT FROM  
IMMUNOGLOBULIN SUPERFAMILY DOMAINS, (113)  
(GO) POSITIVE REGULATION OF CELL CELL  
ADHESION, (114) (GO) INTERLEUKIN 6 PRODUCTION,  
(115) (GO) FORMATION OF PRIMARY GERM LAYER, (116)  
(GO) GROWTH FACTOR BINDING, (117) (GO)  
EPITHELIAL CELL PROLIFERATION, (118) (GO) POSITIVE  
REGULATION OF LOCOMOTION, (119) (GO)  
TRANSCRIPTION FACTOR COMPLEX, (120) (GO)  
PATTERN RECOGNITION RECEPTOR SIGNALING  
PATHWAY, (121) (GO) POSITIVE REGULATION OF  
LEUKOCYTE PROLIFERATION, (122) (GO)  
OSSIFICATION, (123) (GO) INNATE IMMUNE RESPONSE,  
(124) (GO) COLLAGEN TRIMER, (125) (GO) COLLAGEN

|         |                                                                                                                                                                                                                                                                                                                                                                                                                                                                                                                                                                                                                                                                                                                                                                                                                                                                                                                                                                                                                                                                                                                                                                                                                                                                                                                                                                                                                                                                                                                                                                                                                                                                                                    |                                                                                                                                                                                                                                                                                                                                                                                                                                                                                                                                                                                                                                                                                                                                                                                                                                                                                                                                                                                                                                                                                                                          |
|---------|----------------------------------------------------------------------------------------------------------------------------------------------------------------------------------------------------------------------------------------------------------------------------------------------------------------------------------------------------------------------------------------------------------------------------------------------------------------------------------------------------------------------------------------------------------------------------------------------------------------------------------------------------------------------------------------------------------------------------------------------------------------------------------------------------------------------------------------------------------------------------------------------------------------------------------------------------------------------------------------------------------------------------------------------------------------------------------------------------------------------------------------------------------------------------------------------------------------------------------------------------------------------------------------------------------------------------------------------------------------------------------------------------------------------------------------------------------------------------------------------------------------------------------------------------------------------------------------------------------------------------------------------------------------------------------------------------|--------------------------------------------------------------------------------------------------------------------------------------------------------------------------------------------------------------------------------------------------------------------------------------------------------------------------------------------------------------------------------------------------------------------------------------------------------------------------------------------------------------------------------------------------------------------------------------------------------------------------------------------------------------------------------------------------------------------------------------------------------------------------------------------------------------------------------------------------------------------------------------------------------------------------------------------------------------------------------------------------------------------------------------------------------------------------------------------------------------------------|
|         | <p>FIBRIL ORGANIZATION, (126) (GO) NEPHRON DEVELOPMENT, (127) (GO) POSITIVE REGULATION OF IMMUNE RESPONSE, (128) (GO) COLLAGEN METABOLIC PROCESS, (129) (GO) POSITIVE REGULATION OF CYTOKINE PRODUCTION, (130) (GO) CELL ADHESION MEDIATED BY INTEGRIN, (131) (GO) IMMUNE EFFECTOR PROCESS, (132) (GO) TOLL LIKE RECEPTOR SIGNALING PATHWAY, (133) (GO) POSITIVE REGULATION OF T CELL PROLIFERATION, (134) (GO) MORPHOGENESIS OF AN EPITHELIUM, (135) (GO) REGULATION OF RESPONSE TO EXTERNAL STIMULUS, (136) (GO) BASEMENT MEMBRANE, (137) (GO) POSITIVE REGULATION OF HEMOPOIESIS, (138) (GO) REGULATION OF HEMOPOIESIS, (139) (GO) POSITIVE REGULATION OF EPITHELIAL CELL PROLIFERATION, (140) (GO) I KAPPAB KINASE NF KAPPAB SIGNALING, (141) (GO) POSITIVE REGULATION OF TUMOR NECROSIS FACTOR SUPERFAMILY CYTOKINE PRODUCTION, (142) (GO) CELLULAR RESPONSE TO VASCULAR ENDOTHELIAL GROWTH FACTOR STIMULUS, (143) (GO) CHROMATIN BINDING, (144) (GO) ENDOPLASMIC RETICULUM LUMEN, (145) (GO) B CELL MEDIATED IMMUNITY, (146) (GO) REGULATION OF ADAPTIVE IMMUNE RESPONSE, (147) (GO) ACTIVATION OF IMMUNE RESPONSE, (148) (GO) MESENCHYME MORPHOGENESIS, (149) (GO) REGULATION OF DEFENSE RESPONSE</p>                                                                                                                                                                                                                                                                                                                                                                                                                                                                                       |                                                                                                                                                                                                                                                                                                                                                                                                                                                                                                                                                                                                                                                                                                                                                                                                                                                                                                                                                                                                                                                                                                                          |
| Down_AD | <p>(1) (H)K MYC TARGETS V1, (2) (H)K MTORC1 SIGNALING, (3) (H)K DNA REPAIR, (4) (H)K UNFOLDED PROTEIN RESPONSE, (5) (R) APC C CDH1 MEDIATED DEGRADATION OF CDC20 AND OTHER APC C CDH1 TARGETED PROTEINS IN LATE MITOSIS EARLY G1, (6) (R) ASSEMBLY OF THE PRE REPLICATIVE COMPLEX, (7) (R) AUF1 HNRNP D0 BINDS AND DESTABILIZES MRNA, (8) (R) CELL CYCLE CHECKPOINTS, (9) (R) DNA REPLICATION, (10) (R) HIV INFECTION, (11) (R) METABOLISM OF RNA, (12) (R) MITOTIC METAPHASE AND ANAPHASE, (13) (R) ORC1 REMOVAL FROM CHROMATIDS, (14) (R) SEPARATION OF SISTER CHROMATIDS, (15) (R) SWITCHING OF ORIGINS TO A POST REPLICATIVE STATE, (16) (R) TRANSLATION, (17) (R) POST TRANSLATIONAL PROTEIN MODIFICATION, (18) (R) APC C MEDIATED DEGRADATION OF CELL CYCLE PROTEINS, (19) (R) DNA REPLICATION PRE INITIATION, (20) (R) STABILIZATION OF P53, (21) (R) REGULATION OF RUNX3 EXPRESSION AND ACTIVITY, (22) (R) S PHASE, (23) (R) REGULATION OF EXPRESSION OF SLITS AND ROBOS, (24) (R) G2 M CHECKPOINTS, (25) (R) NUCLEOTIDE EXCISION REPAIR, (26) (R) CYCLIN A CDK2 ASSOCIATED EVENTS AT S PHASE ENTRY, (27) (R) PROCESSING OF CAPPED INTRON CONTAINING PRE MRNA, (28) (R) G1 S DNA DAMAGE CHECKPOINTS, (29) (R) CELL CYCLE, (30) (R) M PHASE, (31) (R) TRANSCRIPTION COUPLED NUCLEOTIDE EXCISION REPAIR TC NER, (32) (R) HIV LIFE CYCLE, (33) (R) SIGNALING BY NOTCH4, (34) (R) CELL CYCLE MITOTIC, (35) (R) CELLULAR RESPONSES TO EXTERNAL STIMULI, (36) (R) MRNA SPLICING, (37) (R) GLOBAL GENOME NUCLEOTIDE EXCISION REPAIR GG NER, (38) (R) MITOTIC G1 PHASE AND G1 S TRANSITION, (39) (R) TRNA PROCESSING, (40) (R) MRNA SPLICING MINOR PATHWAY, (41) (R) RRNA PROCESSING, (42) (R)</p> | <p>(1) (R) MEMBRANE TRAFFICKING, (2) (R) NEURONAL SYSTEM, (3) (R) TRANSMISSION ACROSS CHEMICAL SYNAPSES, (4) (R) VESICLE MEDIATED TRANSPORT, (5) (K) CARDIAC MUSCLE CONTRACTION, (6) (R) CLATHRIN MEDIATED ENDOCYTOSIS, (7) (R) NEUROTRANSMITTER RECEPTORS AND POSTSYNAPTIC SIGNAL TRANSMISSION, (8) (R) ACTIVATION OF NMDA RECEPTORS AND POSTSYNAPTIC EVENTS, (9) (R) CAR(GO) RECOGNITION FOR CLATHRIN MEDIATED ENDOCYTOSIS, (10) (R) PROTEIN PROTEIN INTERACTIONS AT SYNAPSES, (11) (GO) AXON, (12) (GO) EXOCYTIC VESICLE, (13) (GO) GLUTAMATERGIC SYNAPSE, (14) (GO) MEMBRANE PROTEIN COMPLEX, (15) (GO) NEURON PROJECTION, (16) (GO) NEURON TO NEURON SYNAPSE, (17) (GO) POSTSYNAPSE, (18) (GO) PRESYNAPSE, (19) (GO) SOMATODENDRITIC COMPARTMENT, (20) (GO) SYNAPSE, (21) (GO) SYNAPTIC MEMBRANE, (22) (GO) SYNAPTIC SIGNALING, (23) (GO) TRANSPORT VESICLE, (24) (GO) VESICLE MEDIATED TRANSPORT IN SYNAPSE, (25) (GO) TRANSPORT VESICLE MEMBRANE, (26) (GO) DENDRITIC TREE, (27) (GO) SYNAPTIC VESICLE MEMBRANE, (28) (GO) MEMBRANE ORGANIZATION, (29) (GO) REGULATION OF TRANS SYNAPTIC SIGNALING, (30) (GO)</p> |

ANTIGEN PROCESSING CROSS PRESENTATION, (43) (R) VIRAL MESSENGER RNA SYNTHESIS, (44) (R) RRNA MODIFICATION IN THE NUCLEUS AND CYTOSOL, (45) (R) DUAL INCISION IN TC NER, (46) (GO) AMIDE BIOSYNTHETIC PROCESS, (47) (GO) ANAPHASE PROMOTING COMPLEX DEPENDENT CATABOLIC PROCESS, (48) (GO) CATALYTIC ACTIVITY ACTING ON RNA, (49) (GO) CATALYTIC COMPLEX, (50) (GO) CELLULAR AMIDE METABOLIC PROCESS, (51) (GO) CELLULAR MACROMOLECULE CATABOLIC PROCESS, (52) (GO) MITOCHONDRIAL GENE EXPRESSION, (53) (GO) MITOCHONDRIAL MATRIX, (54) (GO) NCRNA METABOLIC PROCESS, (55) (GO) NCRNA PROCESSING, (56) (GO) ORGANONITROGEN COMPOUND BIOSYNTHETIC PROCESS, (57) (GO) PEPTIDE BIOSYNTHETIC PROCESS, (58) (GO) PEPTIDE METABOLIC PROCESS, (59) (GO) RIBONUCLEOPROTEIN COMPLEX, (60) (GO) RIBONUCLEOPROTEIN COMPLEX BIOGENESIS, (61) (GO) RIBOSOME, (62) (GO) RIBOSOME BIOGENESIS, (63) (GO) RNA BINDING, (64) (GO) RNA PROCESSING, (65) (GO) TRNA METABOLIC PROCESS, (66) (GO) RIBOSOMAL SUBUNIT, (67) (GO) REGULATION OF CELL CYCLE G2 M PHASE TRANSITION, (68) (GO) CATALYTIC ACTIVITY ACTING ON A TRNA, (69) (GO) NUCLEOLUS, (70) (GO) NEGATIVE REGULATION OF CELL CYCLE G2 M PHASE TRANSITION, (71) (GO) PROTEIN LOCALIZATION TO ORGANELLE, (72) (GO) POSTTRANSCRIPTIONAL REGULATION OF GENE EXPRESSION, (73) (GO) RRNA METABOLIC PROCESS, (74) (GO) STRUCTURAL CONSTITUENT OF RIBOSOME, (75) (GO) MRNA METABOLIC PROCESS, (76) (GO) RIBONUCLEOPROTEIN COMPLEX SUBUNIT ORGANIZATION, (77) (GO) TRANSCRIPTION COUPLED NUCLEOTIDE EXCISION REPAIR, (78) (GO) MACROMOLECULE CATABOLIC PROCESS, (79) (GO) TRNA PROCESSING, (80) (GO) RNA SPLICING VIA TRANSESTERIFICATION REACTIONS, (81) (GO) REGULATION OF MRNA CATABOLIC PROCESS, (82) (GO) ANTIGEN PROCESSING AND PRESENTATION OF EXOGENOUS PEPTIDE ANTIGEN VIA MHC CLASS I, (83) (GO) RIBONUCLEOPROTEIN COMPLEX BINDING, (84) (GO) NUCLEOTIDE EXCISION REPAIR, (85) (GO) RNA CATABOLIC PROCESS, (86) (GO) ATPASE ACTIVITY, (87) (GO) CYTOPLASMIC TRANSLATION, (88) (GO) MRNA PROCESSING, (89) (GO) SPLICEOSOMAL TRI SNRNP COMPLEX, (90) (GO) RNA LOCALIZATION, (91) (GO) RNA SPLICING, (92) (GO) PRERIBOSOME, (93) (GO) SMALL RIBOSOMAL SUBUNIT

REGULATION OF SYNAPTIC PLASTICITY, (31) (GO) CELL BODY, (32) (GO) REGULATION OF SYNAPTIC VESICLE CYCLE, (33) (GO) DENDRITIC SPINE DEVELOPMENT, (34) (GO) POSTSYNAPTIC MEMBRANE, (35) (GO) COGNITION, (36) (GO) MONOVALENT INORGANIC CATION TRANSPORT, (37) (GO) LEARNING, (38) (GO) MICROTUBULE, (39) (GO) SYNAPTIC VESICLE EXOCYTOSIS, (40) (GO) DENDRITIC SPINE MORPHOGENESIS, (41) (GO) REGULATION OF DENDRITIC SPINE DEVELOPMENT, (42) (GO) NEURON PROJECTION CYTOPLASM, (43) (GO) BEHAVIOR, (44) (GO) MONOVALENT INORGANIC CATION TRANSMEMBRANE TRANSPORTER ACTIVITY, (45) (GO) DISTAL AXON, (46) (GO) NEUROTRANSMITTER SECRETION, (47) (GO) PRESYNAPTIC MEMBRANE, (48) (GO) VESICLE LOCALIZATION, (49) (GO) CATION TRANSMEMBRANE TRANSPORT, (50) (GO) GABA ERGIC SYNAPSE, (51) (GO) SYNAPTIC VESICLE RECYCLING, (52) (GO) AXON CYTOPLASM, (53) (GO) POSTSYNAPTIC SPECIALIZATION MEMBRANE, (54) (GO) POSTSYNAPTIC DENSITY MEMBRANE, (55) (GO) ORGANELLE TRANSPORT ALONG MICROTUBULE, (56) (GO) PROTEIN LOCALIZATION TO MEMBRANE, (57) (GO) NEUROTRANSMITTER TRANSPORT, (58) (GO) MICROTUBULE BASED TRANSPORT, (59) (GO) REGULATION OF NEURONAL SYNAPTIC PLASTICITY, (60) (GO) PRESYNAPTIC ACTIVE ZONE, (61) (GO) REGULATION OF SYNAPTIC VESICLE EXOCYTOSIS, (62) (GO) TRANSMEMBRANE TRANSPORT, (63) (GO) INORGANIC ION TRANSMEMBRANE TRANSPORT, (64) (GO) SNARE BINDING, (65) (GO) CYTOSKELETON DEPENDENT INTRACELLULAR TRANSPORT, (66) (GO) REGULATION OF DENDRITIC SPINE MORPHOGENESIS, (67) (GO) DENDRITE DEVELOPMENT, (68) (GO) PROTEIN LOCALIZATION TO SYNAPSE, (69) (GO) SITE OF POLARIZED GROWTH, (70) (GO) SYNAPSE ORGANIZATION, (71) (GO) ION TRANSMEMBRANE TRANSPORT, (72) (GO) SYNAPTIC VESICLE ENDOCYTOSIS, (73) (GO) REGULATION OF DENDRITE DEVELOPMENT, (74) (GO) SCHAFER COLLATERAL CA1 SYNAPSE, (75) (GO) MEMORY, (76) (GO) GLUTAMATE RECEPTOR SIGNALING PATHWAY, (77) (GO) REGULATION OF NEURON PROJECTION DEVELOPMENT, (78) (GO) AXO DENDRITIC TRANSPORT, (79) (GO) POSTSYNAPSE



|  |  |                                                                                                                                                                                                                                                                                                                                                                                                                                                                                                                                                                                                                                      |
|--|--|--------------------------------------------------------------------------------------------------------------------------------------------------------------------------------------------------------------------------------------------------------------------------------------------------------------------------------------------------------------------------------------------------------------------------------------------------------------------------------------------------------------------------------------------------------------------------------------------------------------------------------------|
|  |  | <p>ORGANIZATION, (80) (GO)<br/>REGULATION OF SYNAPTIC VESICLE<br/>RECYCLING, (81) (GO) NEURON<br/>PROJECTION ORGANIZATION, (82) (GO)<br/>REGULATION OF NEUROTRANSMITTER<br/>TRANSPORT, (83) (GO) DENDRITE<br/>MORPHOGENESIS, (84) (GO) TUBULIN<br/>BINDING, (85) (GO) INTRINSIC<br/>COMPONENT OF SYNAPTIC VESICLE<br/>MEMBRANE, (86) (GO) REGULATION OF<br/>LONG TERM NEURONAL SYNAPTIC<br/>PLASTICITY, (87) (GO) REGULATION OF<br/>POSTSYNAPTIC MEMBRANE<br/>NEUROTRANSMITTER RECEPTOR<br/>LEVELS, (88) (GO) POSITIVE<br/>REGULATION OF DENDRITIC SPINE<br/>DEVELOPMENT, (89) (GO) REGULATION<br/>OF NEUROTRANSMITTER SECRETION</p> |
|--|--|--------------------------------------------------------------------------------------------------------------------------------------------------------------------------------------------------------------------------------------------------------------------------------------------------------------------------------------------------------------------------------------------------------------------------------------------------------------------------------------------------------------------------------------------------------------------------------------------------------------------------------------|

**Table S4.** Jointly deregulated pathways in AD and THCA.

|       | Up_THCA                                                                                                                                                                                                                                                                                                                                                                                                                                                                                                                                                                                                                                                                                                                                                                                                                                                                                                                                                                                                                                                                                                                                                                                                                                                                                                                                                                                                                                                                                                                                                                                                                                                                                                                                                                                                                                                                                                                                                                                                                                                                                                                                                                                                                                                                                                                                                                                                                                                                                                                                                                                                                                                                                                                                                                                                                                                                                                                                                             | Down_THCA                                                                                            |
|-------|---------------------------------------------------------------------------------------------------------------------------------------------------------------------------------------------------------------------------------------------------------------------------------------------------------------------------------------------------------------------------------------------------------------------------------------------------------------------------------------------------------------------------------------------------------------------------------------------------------------------------------------------------------------------------------------------------------------------------------------------------------------------------------------------------------------------------------------------------------------------------------------------------------------------------------------------------------------------------------------------------------------------------------------------------------------------------------------------------------------------------------------------------------------------------------------------------------------------------------------------------------------------------------------------------------------------------------------------------------------------------------------------------------------------------------------------------------------------------------------------------------------------------------------------------------------------------------------------------------------------------------------------------------------------------------------------------------------------------------------------------------------------------------------------------------------------------------------------------------------------------------------------------------------------------------------------------------------------------------------------------------------------------------------------------------------------------------------------------------------------------------------------------------------------------------------------------------------------------------------------------------------------------------------------------------------------------------------------------------------------------------------------------------------------------------------------------------------------------------------------------------------------------------------------------------------------------------------------------------------------------------------------------------------------------------------------------------------------------------------------------------------------------------------------------------------------------------------------------------------------------------------------------------------------------------------------------------------------|------------------------------------------------------------------------------------------------------|
| Up_AD | <p>(1) (H)K INFLAMMATORY RESPONSE, (2) (H)K EPITHELIAL MESENCHYMAL TRANSITION, (3) (H)K ALLOGRAFT REJECTION, (4) (H)K IL6 JAK STAT3 SIGNALING, (5) (H)K COAGULATION, (6) (H)K TNFA SIGNALING VIA NFKB, (7) (H)K IL2 STAT5 SIGNALING, (8) (K) CYTOKINE CYTOKINE RECEPTOR INTERACTION, (9) NABA MATRISOME, (10) NABA MATRISOME ASSOCIATED, (11) NABA SECRETED FACTORS, (12) (R) EXTRACELLULAR MATRIX ORGANIZATION, (13) (R) IMMUNOREGULATORY INTERACTIONS BETWEEN A LYMPHOID AND A NON LYMPHOID CELL, (14) (R) INTERLEUKIN 4 AND INTERLEUKIN 13 SIGNALING, (15) NABA ECM REGULATORS, (16) (R) CLASS A 1 RHODOPSIN LIKE RECEPTORS, (17) (R) CELL SURFACE INTERACTIONS AT THE VASCULAR WALL, (18) (R) COLLAGEN FORMATION, (19) (R) KERATINIZATION, (20) (K) ECM RECEPTOR INTERACTION, (21) (R) ECM PROTEOGLYCANS, (22) (R) ASSEMBLY OF COLLAGEN FIBRILS AND OTHER MULTIMERIC STRUCTURES, (23) (K) CELL ADHESION MOLECULES CAMS, (24) (R) GPCR LIGAND BINDING, (25) (R) NON INTEGRIN MEMBRANE ECM INTERACTIONS, (26) (PID) INTEGRIN1 PATHWAY, (27) (R) INTEGRIN CELL SURFACE INTERACTIONS, (28) (R) DEGRADATION OF THE EXTRACELLULAR MATRIX, (29) (R) COLLAGEN DEGRADATION, (30) (R) SIGNALING BY INTERLEUKINS, (31) (R) INTERLEUKIN 10 SIGNALING, (32) (R) SYNDECAN INTERACTIONS, (33) (GO) ADAPTIVE IMMUNE RESPONSE, (34) (GO) ANATOMICAL STRUCTURE FORMATION INVOLVED IN MORPHOGENESIS, (35) (GO) ANIMAL ORGAN MORPHOGENESIS, (36) (GO) BIOLOGICAL ADHESION, (37) (GO) BLOOD VESSEL MORPHOGENESIS, (38) (GO) CARDIOVASCULAR SYSTEM DEVELOPMENT, (39) (GO) CELL ACTIVATION, (40) (GO) CELL CELL ADHESION, (41) (GO) CELL MOTILITY, (42) (GO) CELL SURFACE, (43) (GO) CIRCULATORY SYSTEM DEVELOPMENT, (44) (GO) COLLAGEN CONTAINING EXTRACELLULAR MATRIX, (45) (GO) CYTOKINE MEDIATED SIGNALING PATHWAY, (46) (GO) CYTOKINE PRODUCTION, (47) (GO) DEFENSE RESPONSE, (48) (GO) EMBRYO DEVELOPMENT, (49) (GO) E(PID)ERMIS DEVELOPMENT, (50) (GO) EPITHELIUM DEVELOPMENT, (51) (GO) EXTRACELLULAR MATRIX, (52) (GO) EXTRACELLULAR STRUCTURE ORGANIZATION, (53) (GO) INFLAMMATORY RESPONSE, (54) (GO) INTRINSIC COMPONENT OF PLASMA MEMBRANE, (55) (GO) LEUKOCYTE MIGRATION, (56) (GO) LOCOMOTION, (57) (GO) MOLECULAR TRANSDUCER ACTIVITY, (58) (GO) NEGATIVE REGULATION OF DEVELOPMENTAL PROCESS, (59) (GO) NEGATIVE REGULATION OF MULTICELLULAR ORGANISMAL PROCESS, (60) (GO) POSITIVE REGULATION OF CELL POPULATION PROLIFERATION, (61) (GO) POSITIVE REGULATION OF DEVELOPMENTAL PROCESS, (62) (GO) POSITIVE REGULATION OF IMMUNE SYSTEM PROCESS, (63) (GO) REGULATION OF CELL ACTIVATION, (64) (GO) REGULATION OF CELL ADHESION, (65) (GO) REGULATION OF CELL POPULATION PROLIFERATION, (66) (GO) REGULATION OF IMMUNE SYSTEM PROCESS, (67) (GO) REGULATION OF VASCULATURE DEVELOPMENT, (68) (GO) RESPONSE TO BACTERIUM, (69) (GO) RESPONSE TO BIOTIC STIMULUS, (70) (GO) RESPONSE TO WOUNDING, (71) (GO) SKIN DEVELOPMENT, (72) (GO) TUBE DEVELOPMENT, (73) (GO)</p> | <p>(1) (GO) DNA BINDING TRANSCRIPTION FACTOR ACTIVITY, (2) (GO) TRANSCRIPTION REGULATOR ACTIVITY</p> |

|         |                                                                                                                                                                                                                                                                                                                                                                                                                                                                                                                                                                                                                                                                                                                                                                                                                                                                                                                                                                                                                                                                                                                                                                                                                                                                                                                                                                                                                                                                                                                                                                                                                                                                                                                                                                                                                                                                                                                                                                                                                                                                                                                                                                                                     |                                                                                                                                                                                                                                                                                                                                                                                                                                                                                                                                                                                                                 |
|---------|-----------------------------------------------------------------------------------------------------------------------------------------------------------------------------------------------------------------------------------------------------------------------------------------------------------------------------------------------------------------------------------------------------------------------------------------------------------------------------------------------------------------------------------------------------------------------------------------------------------------------------------------------------------------------------------------------------------------------------------------------------------------------------------------------------------------------------------------------------------------------------------------------------------------------------------------------------------------------------------------------------------------------------------------------------------------------------------------------------------------------------------------------------------------------------------------------------------------------------------------------------------------------------------------------------------------------------------------------------------------------------------------------------------------------------------------------------------------------------------------------------------------------------------------------------------------------------------------------------------------------------------------------------------------------------------------------------------------------------------------------------------------------------------------------------------------------------------------------------------------------------------------------------------------------------------------------------------------------------------------------------------------------------------------------------------------------------------------------------------------------------------------------------------------------------------------------------|-----------------------------------------------------------------------------------------------------------------------------------------------------------------------------------------------------------------------------------------------------------------------------------------------------------------------------------------------------------------------------------------------------------------------------------------------------------------------------------------------------------------------------------------------------------------------------------------------------------------|
|         | <p>TUBE MORPHOGENESIS, (74) (GO) WOUND HEALING, (75) (GO) POSITIVE REGULATION OF MULTICELLULAR ORGANISMAL PROCESS, (76) (GO) E(PID)ERMAL CELL DIFFERENTIATION, (77) (GO) RESPONSE TO CYTOKINE, (78) (GO) EMBRYO DEVELOPMENT ENDING IN BIRTH OR EGG HATCHING, (79) (GO) DEFENSE RESPONSE TO OTHER ORGANISM, (80) (GO) REGULATION OF IMMUNE RESPONSE, (81) (GO) REGULATION OF CELL DIFFERENTIATION, (82) (GO) POSITIVE REGULATION OF INTRACELLULAR SIGNAL TRANSDUCTION, (83) (GO) KERATINOCYTE DIFFERENTIATION, (84) (GO) TISSUE MORPHOGENESIS, (85) (GO) CYTOKINE ACTIVITY, (86) (GO) TISSUE REMODELING, (87) (GO) DEFENSE RESPONSE TO BACTERIUM, (88) (GO) REGULATION OF CELLULAR COMPONENT MOVEMENT, (89) (GO) POSITIVE REGULATION OF LOCOMOTION, (90) (GO) CELL SUBSTRATE ADHESION, (91) (GO) SIGNALING RECEPTOR BINDING, (92) (GO) RECEPTOR REGULATOR ACTIVITY, (93) (GO) INNATE IMMUNE RESPONSE, (94) (GO) COLLAGEN FIBRIL ORGANIZATION, (95) (GO) CYTOKINE SECRETION, (96) (GO) CELL CHEMOTAXIS, (97) (GO) POSITIVE REGULATION OF MAPK CASCADE, (98) (GO) POSITIVE REGULATION OF CELL DIFFERENTIATION, (99) (GO) REGULATION OF BODY FLUID LEVELS, (100) (GO) POSITIVE REGULATION OF IMMUNE RESPONSE, (101) (GO) COLLAGEN METABOLIC PROCESS, (102) (GO) POSITIVE REGULATION OF CYTOKINE PRODUCTION, (103) (GO) POSITIVE REGULATION OF PHOSPHORUS METABOLIC PROCESS, (104) (GO) POSITIVE REGULATION OF SIGNALING, (105) (GO) REGULATION OF INFLAMMATORY RESPONSE, (106) (GO) IMMUNE EFFECTOR PROCESS, (107) (GO) MORPHOGENESIS OF AN EPITHELIUM, (108) (GO) REGULATION OF RESPONSE TO EXTERNAL STIMULUS, (109) (GO) GRANULOCYTE MIGRATION, (110) (GO) KERATINIZATION, (111) (GO) ANCHORING JUNCTION, (112) (GO) TAXIS, (113) (GO) POSITIVE REGULATION OF PROTEIN MODIFICATION PROCESS, (114) (GO) I KAPPAB KINASE NF KAPPAB SIGNALING, (115) (GO) PHA(GO)CYTOSIS, (116) (GO) REGULATION OF ANATOMICAL STRUCTURE MORPHOGENESIS, (117) (GO) POSITIVE REGULATION OF ERK1 AND ERK2 CASCADE, (118) (GO) INTEGRIN MEDIATED SIGNALING PATHWAY, (119) (GO) ENDOPLASMIC RETICULUM LUMEN, (120) (GO) REPRODUCTION, (121) (GO) ACTIVATION OF IMMUNE RESPONSE, (122) (GO) REGULATION OF DEFENSE RESPONSE</p> |                                                                                                                                                                                                                                                                                                                                                                                                                                                                                                                                                                                                                 |
| Down_AD | <p>(1) (H)K MTORC1 SIGNALING, (2) (R) CELL CYCLE CHECKPOINTS, (3) (R) G2 M CHECKPOINTS, (4) (R) CELL CYCLE, (5) (R) M PHASE, (6) (R) CELL CYCLE MITOTIC, (7) (R) MITOTIC G1 PHASE AND G1 S TRANSITION, (8) (R) MHC CLASS II ANTIGEN PRESENTATION, (9) (R) NERVOUS SYSTEM DEVELOPMENT, (10) (GO) GLUTAMATERGIC SYNAPSE, (11) (GO) NEURON PROJECTION, (12) (GO) POSTSYNAPSE, (13) (GO) SOMATODENDRITIC COMPARTMENT, (14) (GO) SYNAPSE, (15) (GO) SYNAPTIC MEMBRANE, (16) (GO) SYNAPTIC SIGNALING, (17) (GO) DENDRITIC TREE, (18) (GO) REGULATION OF TRANS SYNAPTIC SIGNALING, (19) (GO) ANTIGEN PROCESSING AND PRESENTATION OF PEPTIDE ANTIGEN, (20) (GO) SYNAPSE ORGANIZATION, (21) (GO) ORGANELLE SUBCOMPARTMENT, (22) (GO) REGULATION OF NEURON PROJECTION DEVELOPMENT, (23) (GO) POSTSYNAPSE ORGANIZATION, (24) (GO) ANTIGEN PROCESSING AND PRESENTATION</p>                                                                                                                                                                                                                                                                                                                                                                                                                                                                                                                                                                                                                                                                                                                                                                                                                                                                                                                                                                                                                                                                                                                                                                                                                                                                                                                                      | <p>(1) (H)K OXIDATIVE PHOSPHORYLATION, (2) (K) HUNTINGTONS DISEASE, (3) (K) OXIDATIVE PHOSPHORYLATION, (4) (K) PARKINSONS DISEASE, (5) (R) COMPLEX I BIOGENESIS, (6) (R) METABOLISM OF RNA, (7) (R) RESPIRATORY ELECTRON TRANSPORT, (8) (R) RESPIRATORY ELECTRON TRANSPORT ATP SYNTHESIS BY CHEMIOSMOTIC COUPLING AND HEAT PRODUCTION BY UNCOUPLING PROTEINS, (9) (R) THE CITRIC ACID TCA CYCLE AND RESPIRATORY ELECTRON TRANSPORT, (10) (R) TRANSLATION, (11) (R) PROTEIN LOCALIZATION, (12) (R) CRISTAE FORMATION, (13) (R) PROCESSING OF CAPPED INTRON CONTAINING PRE MRNA, (14) (R) FORMATION OF ATP BY</p> |

CHEMIOSMOTIC COUPLING, (15) (R)  
MITOCHONDRIAL BIOGENESIS, (16) (R)  
MRNA SPLICING, (17) (R) METABOLISM  
OF AMINO ACIDS AND DERIVATIVES,  
(18) (GO) ATP METABOLIC PROCESS, (19)  
(GO) ATP SYNTHESIS COUPLED  
ELECTRON TRANSPORT, (20) (GO)  
CATALYTIC COMPLEX, (21) (GO)  
CELLULAR RESPIRATION, (22) (GO)  
ELECTRON TRANSPORT CHAIN, (23)  
(GO) ENERGY DERIVATION BY  
OXIDATION OF ORGANIC  
COMPOUNDS, (24) (GO) ENVELOPE, (25)  
(GO) GENERATION OF PRECURSOR  
METABOLITES AND ENERGY, (26) (GO)  
INNER MITOCHONDRIAL MEMBRANE  
PROTEIN COMPLEX, (27) (GO)  
INTRACELLULAR PROTEIN  
TRANSPORT, (28) (GO) INTRACELLULAR  
TRANSPORT, (29) (GO)  
MITOCHONDRIAL ELECTRON  
TRANSPORT NADH TO UBIQUINONE,  
(30) (GO) MITOCHONDRIAL ENVELOPE,  
(31) (GO) MITOCHONDRIAL MATRIX,  
(32) (GO) MITOCHONDRIAL PROTEIN  
COMPLEX, (33) (GO) MITOCHONDRIAL  
RESPIRATORY CHAIN COMPLEX  
ASSEMBLY, (34) (GO) MITOCHONDRION,  
(35) (GO) MITOCHONDRION  
ORGANIZATION, (36) (GO) NADH  
DEHYDROGENASE ACTIVITY, (37) (GO)  
NADH DEHYDROGENASE COMPLEX,  
(38) (GO) NADH DEHYDROGENASE  
COMPLEX ASSEMBLY, (39) (GO)  
ORGANELLE INNER MEMBRANE, (40)  
(GO) OXIDATIVE PHOSPHORYLATION,  
(41) (GO) PEPTIDE BIOSYNTHETIC  
PROCESS, (42) (GO) RESPIRASOME, (43)  
(GO) RESPIRATORY CHAIN COMPLEX,  
(44) (GO) RESPIRATORY ELECTRON  
TRANSPORT CHAIN, (45) (GO)  
RIBONUCLEOPROTEIN COMPLEX, (46)  
(GO) RIBOSOME, (47) (GO) RNA  
BINDING, (48) (GO) RNA PROCESSING,  
(49) (GO) RIBOSOMAL SUBUNIT, (50)  
(GO) OXIDOREDUCTASE ACTIVITY  
ACTING ON NAD P H QUINONE OR  
SIMILAR COMPOUND AS ACCEPTOR,  
(51) (GO) PROTEIN TARGETING, (52) (GO)  
STRUCTURAL CONSTITUENT OF  
RIBOSOME, (53) (GO) MRNA METABOLIC  
PROCESS, (54) (GO) OXIDATION  
REDUCTION PROCESS, (55) (GO)  
RIBONUCLEOPROTEIN COMPLEX  
SUBUNIT ORGANIZATION, (56) (GO)  
CRISTAE FORMATION, (57) (GO) ATP  
SYNTHESIS COUPLED PROTON  
TRANSPORT, (58) (GO) PROTON  
TRANSPORTING ATP SYNTHASE  
COMPLEX, (59) (GO) RNA SPLICING VIA  
TRANSESTERIFICATION REACTIONS,  
(60) (GO) OXIDOREDUCTASE ACTIVITY,  
(61) (GO) MRNA PROCESSING, (62) (GO)

RNA SPLICING, (63) (GO) SMALL  
RIBOSOMAL SUBUNIT

**Table S5.** Jointly deregulated pathways in AD and BLCA.

|       | Up_BLCA                                                                                                                                                                                                                                                                                                                                                                                     | Down_BLCA                                                                                                                                                                                                                                                                                                                                                                                                                                                                                                                                                                                                                                                                                                                                                                                                                                                                                                                                                                                                                                                                                                                                                                                                                                                                                                                                                                                                                                                                                                                                                                                                                                                                                                                                                                                                                                                                                                                                    |
|-------|---------------------------------------------------------------------------------------------------------------------------------------------------------------------------------------------------------------------------------------------------------------------------------------------------------------------------------------------------------------------------------------------|----------------------------------------------------------------------------------------------------------------------------------------------------------------------------------------------------------------------------------------------------------------------------------------------------------------------------------------------------------------------------------------------------------------------------------------------------------------------------------------------------------------------------------------------------------------------------------------------------------------------------------------------------------------------------------------------------------------------------------------------------------------------------------------------------------------------------------------------------------------------------------------------------------------------------------------------------------------------------------------------------------------------------------------------------------------------------------------------------------------------------------------------------------------------------------------------------------------------------------------------------------------------------------------------------------------------------------------------------------------------------------------------------------------------------------------------------------------------------------------------------------------------------------------------------------------------------------------------------------------------------------------------------------------------------------------------------------------------------------------------------------------------------------------------------------------------------------------------------------------------------------------------------------------------------------------------|
| Up_AD | <p>(1) (R) KERATINIZATION, (2) (R) TRANSCRIPTIONAL REGULATION OF GRANULOPOIESIS, (3) (R) FORMATION OF THE CORNIFIED ENVELOPE, (4) (R) RUNX1 REGULATES GENES INVOLVED IN MEGAKARYOCYTE DIFFERENTIATION AND PLATELET FUNCTION, (5) (GO) CHROMATIN, (6) (GO) CHROMOSOME, (7) (GO) NUCLEAR CHROMOSOME, (8) (GO) KERATINIZATION, (9) (GO) CHROMATIN BINDING, (10) (GO) DNA PACKAGING COMPLEX</p> | <p>(1) (H)K INFLAMMATORY RESPONSE, (2) (H)K EPITHELIAL MESENCHYMAL TRANSITION, (3) (H)K ALLOGRAFT REJECTION, (4) (H)K MYOGENESIS, (5) (H)K COAGULATION, (6) (H)K TNFA SIGNALING VIA NFKB, (7) (H)K IL2 STAT5 SIGNALING, (8) (K) CYTOKINE CYTOKINE RECEPTOR INTERACTION, (9) NABA CORE MATRISOME, (10) NABA MATRISOME, (11) (R) EXTRACELLULAR MATRIX ORGANIZATION, (12) (R) IMMUNOREGULATORY INTERACTIONS BETWEEN A LYMPHOID AND A NON LYMPHOID CELL, (13) (K) HEMATOPOIETIC CELL LINEAGE, (14) NABA ECM GLYCOPROTEINS, (15) (R) ELASTIC FIBRE FORMATION, (16) (K) COMPLEMENT AND COAGULATION CASCADES, (17) (R) COMPLEMENT CASCADE, (18) (R) MOLECULES ASSOCIATED WITH ELASTIC FIBRES, (19) (K) CELL ADHESION MOLECULES CAMS, (20) (PID) INTEGRIN1 PATHWAY, (21) (R) INTEGRIN CELL SURFACE INTERACTIONS, (22) (K) JAK STAT SIGNALING PATHWAY, (23) (K) GRAFT VERSUS HOST DISEASE, (24) (GO) ADAPTIVE IMMUNE RESPONSE, (25) (GO) ALPHA BETA T CELL ACTIVATION, (26) (GO) ANATOMICAL STRUCTURE FORMATION INVOLVED IN MORPHOGENESIS, (27) (GO) ANIMAL ORGAN MORPHOGENESIS, (28) (GO) BIOLOGICAL ADHESION, (29) (GO) BLOOD VESSEL MORPHOGENESIS, (30) (GO) BONE DEVELOPMENT, (31) (GO) CARDIOVASCULAR SYSTEM DEVELOPMENT, (32) (GO) CELL ACTIVATION, (33) (GO) CELL CELL ADHESION, (34) (GO) CELL SURFACE, (35) (GO) CIRCULATORY SYSTEM DEVELOPMENT, (36) (GO) COLLAGEN CONTAINING EXTRACELLULAR MATRIX, (37) (GO) CONNECTIVE TISSUE DEVELOPMENT, (38) (GO) CYTOKINE MEDIATED SIGNALING PATHWAY, (39) (GO) CYTOKINE PRODUCTION, (40) (GO) EMBRYONIC MORPHOGENESIS, (41) (GO) EXTERNAL SIDE OF PLASMA MEMBRANE, (42) (GO) EXTRACELLULAR MATRIX, (43) (GO) EXTRACELLULAR MATRIX STRUCTURAL CONSTITUENT, (44) (GO) EXTRACELLULAR STRUCTURE ORGANIZATION, (45) (GO) IMMUNE RECEPTOR ACTIVITY, (46) (GO) IMMUNE SYSTEM DEVELOPMENT, (47) (GO) INFLAMMATORY RESPONSE, (48) (GO) LEUKOCYTE CELL CELL ADHESION, (49) (GO) LEUKOCYTE DIFFERENTIATION,</p> |

|  |  |                                                                                                                                                                                                                                                                                                                                                                                                                                                                                                                                                                                                                                                                                                                                                                                                                                                                                                                                                                                                                                                                                                                                                                                                                                                                                                                                                                                                                                                                                                                                                                                                                                                                                                                                                                                                                                                                                                                                                                                                                                                               |
|--|--|---------------------------------------------------------------------------------------------------------------------------------------------------------------------------------------------------------------------------------------------------------------------------------------------------------------------------------------------------------------------------------------------------------------------------------------------------------------------------------------------------------------------------------------------------------------------------------------------------------------------------------------------------------------------------------------------------------------------------------------------------------------------------------------------------------------------------------------------------------------------------------------------------------------------------------------------------------------------------------------------------------------------------------------------------------------------------------------------------------------------------------------------------------------------------------------------------------------------------------------------------------------------------------------------------------------------------------------------------------------------------------------------------------------------------------------------------------------------------------------------------------------------------------------------------------------------------------------------------------------------------------------------------------------------------------------------------------------------------------------------------------------------------------------------------------------------------------------------------------------------------------------------------------------------------------------------------------------------------------------------------------------------------------------------------------------|
|  |  | <p>(50) (GO) LEUKOCYTE MIGRATION, (51) (GO) LEUKOCYTE PROLIFERATION, (52) (GO) LYMPHOCYTE ACTIVATION, (53) (GO) LYMPHOCYTE DIFFERENTIATION, (54) (GO) MOLECULAR TRANSDUCER ACTIVITY, (55) (GO) NEGATIVE REGULATION OF DEVELOPMENTAL PROCESS, (56) (GO) NEGATIVE REGULATION OF IMMUNE SYSTEM PROCESS, (57) (GO) NEGATIVE REGULATION OF MULTICELLULAR ORGANISMAL PROCESS, (58) (GO) POSITIVE REGULATION OF CELL POPULATION PROLIFERATION, (59) (GO) POSITIVE REGULATION OF DEVELOPMENTAL PROCESS, (60) (GO) POSITIVE REGULATION OF IMMUNE SYSTEM PROCESS, (61) (GO) POSITIVE REGULATION OF VASCULATURE DEVELOPMENT, (62) (GO) REGULATION OF CELL ACTIVATION, (63) (GO) REGULATION OF CELL ADHESION, (64) (GO) REGULATION OF IMMUNE SYSTEM PROCESS, (65) (GO) REGULATION OF LEUKOCYTE PROLIFERATION, (66) (GO) REGULATION OF LYMPHOCYTE ACTIVATION, (67) (GO) REGULATION OF VASCULATURE DEVELOPMENT, (68) (GO) RESPONSE TO BACTERIUM, (69) (GO) RESPONSE TO BIOTIC STIMULUS, (70) (GO) RESPONSE TO LI(PID), (71) (GO) RESPONSE TO MOLECULE OF BACTERIAL ORIGIN, (72) (GO) RESPONSE TO WOUNDING, (73) (GO) SKELETAL SYSTEM DEVELOPMENT, (74) (GO) TUBE DEVELOPMENT, (75) (GO) TUBE MORPHOGENESIS, (76) (GO) T CELL ACTIVATION, (77) (GO) UROGENITAL SYSTEM DEVELOPMENT, (78) (GO) WOUND HEALING, (79) (GO) RENAL SYSTEM DEVELOPMENT, (80) (GO) CARTILAGE DEVELOPMENT, (81) (GO) REGULATION OF LEUKOCYTE DIFFERENTIATION, (82) (GO) NEGATIVE REGULATION OF CYTOKINE PRODUCTION, (83) (GO) T CELL DIFFERENTIATION, (84) (GO) POSITIVE REGULATION OF CELL ACTIVATION, (85) (GO) CYTOKINE RECEPTOR ACTIVITY, (86) (GO) RESPONSE TO CYTOKINE, (87) (GO) REGULATION OF T CELL ACTIVATION, (88) (GO) REGULATION OF CELL CELL ADHESION, (89) (GO) CYTOKINE BINDING, (90) (GO) MUSCLE STRUCTURE DEVELOPMENT, (91) (GO) POSITIVE REGULATION OF CELL ADHESION, (92) (GO) T CELL PROLIFERATION, (93) (GO) DEFENSE RESPONSE TO OTHER ORGANISM, (94) (GO) REGULATION OF IMMUNE RESPONSE, (95) (GO) HEART DEVELOPMENT, (96) (GO) REGULATION OF IMMUNE EFFECTOR PROCESS, (97)</p> |
|--|--|---------------------------------------------------------------------------------------------------------------------------------------------------------------------------------------------------------------------------------------------------------------------------------------------------------------------------------------------------------------------------------------------------------------------------------------------------------------------------------------------------------------------------------------------------------------------------------------------------------------------------------------------------------------------------------------------------------------------------------------------------------------------------------------------------------------------------------------------------------------------------------------------------------------------------------------------------------------------------------------------------------------------------------------------------------------------------------------------------------------------------------------------------------------------------------------------------------------------------------------------------------------------------------------------------------------------------------------------------------------------------------------------------------------------------------------------------------------------------------------------------------------------------------------------------------------------------------------------------------------------------------------------------------------------------------------------------------------------------------------------------------------------------------------------------------------------------------------------------------------------------------------------------------------------------------------------------------------------------------------------------------------------------------------------------------------|

|  |  |                                                                                                                                                                                                                                                                                                                                                                                                                                                                                                                                                                                                                                                                                                                                                                                                                                                                                                                                                                                                                                                                                                                                                                                                                                                                                                                                                                                                                                                                                                                                                                                                                                                                                                                                                                                                                                                                                                                                                                                                                                                                                                                                                                                           |
|--|--|-------------------------------------------------------------------------------------------------------------------------------------------------------------------------------------------------------------------------------------------------------------------------------------------------------------------------------------------------------------------------------------------------------------------------------------------------------------------------------------------------------------------------------------------------------------------------------------------------------------------------------------------------------------------------------------------------------------------------------------------------------------------------------------------------------------------------------------------------------------------------------------------------------------------------------------------------------------------------------------------------------------------------------------------------------------------------------------------------------------------------------------------------------------------------------------------------------------------------------------------------------------------------------------------------------------------------------------------------------------------------------------------------------------------------------------------------------------------------------------------------------------------------------------------------------------------------------------------------------------------------------------------------------------------------------------------------------------------------------------------------------------------------------------------------------------------------------------------------------------------------------------------------------------------------------------------------------------------------------------------------------------------------------------------------------------------------------------------------------------------------------------------------------------------------------------------|
|  |  | (GO) MORPHOGENESIS OF A<br>BRANCHING STRUCTURE, (98) (GO) B<br>CELL ACTIVATION, (99) (GO) NEGATIVE<br>REGULATION OF CELL<br>DIFFERENTIATION, (100) (GO) POSITIVE<br>REGULATION OF INTRACELLULAR<br>SIGNAL TRANSDUCTION, (101) (GO)<br>RECEPTOR COMPLEX, (102) (GO) TUMOR<br>NECROSIS FACTOR SUPERFAMILY<br>CYTOKINE PRODUCTION, (103) (GO)<br>NEGATIVE REGULATION OF CELL<br>ACTIVATION, (104) (GO) GLAND<br>MORPHOGENESIS, (105) (GO) SIDE OF<br>MEMBRANE, (106) (GO) MYELOID CELL<br>DIFFERENTIATION, (107) (GO) TISSUE<br>REMODELING, (108) (GO) POSITIVE<br>REGULATION OF LEUKOCYTE CELL<br>CELL ADHESION, (109) (GO) B CELL<br>DIFFERENTIATION, (110) (GO) T CELL<br>ACTIVATION INVOLVED IN IMMUNE<br>RESPONSE, (111) (GO) INTERLEUKIN 8<br>PRODUCTION, (112) (GO) ADAPTIVE<br>IMMUNE RESPONSE BASED ON<br>SOMATIC RECOMBINATION OF<br>IMMUNE RECEPTORS BUILT FROM<br>IMMUNOGLOBULIN SUPERFAMILY<br>DOMAINS, (113) (GO) REGULATION OF<br>CELLULAR COMPONENT MOVEMENT,<br>(114) (GO) ALPHA BETA T CELL<br>DIFFERENTIATION, (115) (GO)<br>NEGATIVE REGULATION OF<br>LYMPHOCYTE ACTIVATION, (116) (GO)<br>POSITIVE REGULATION OF CELL CELL<br>ADHESION, (117) (GO) INTERLEUKIN 6<br>PRODUCTION, (118) (GO) POSITIVE<br>REGULATION OF RECEPTOR<br>SIGNALING PATHWAY VIA STAT, (119)<br>(GO) GASTRULATION, (120) (GO)<br>MUSCLE ORGAN DEVELOPMENT, (121)<br>(GO) FORMATION OF PRIMARY GERM<br>LAYER, (122) (GO) NEGATIVE<br>REGULATION OF HEMOPOIESIS, (123)<br>(GO) EPITHELIAL CELL PROLIFERATION,<br>(124) (GO) POSITIVE REGULATION OF<br>LOCOMOTION, (125) (GO) CELL<br>SUBSTRATE ADHESION, (126) (GO)<br>SIGNALING RECEPTOR BINDING, (127)<br>(GO) POSITIVE REGULATION OF<br>PHOSPHATIDYLINOSITOL 3 KINASE<br>SIGNALING, (128) (GO) HEART<br>MORPHOGENESIS, (129) (GO) POSITIVE<br>REGULATION OF LEUKOCYTE<br>PROLIFERATION, (130) (GO)<br>OSSIFICATION, (131) (GO) INNATE<br>IMMUNE RESPONSE, (132) (GO)<br>COLLAGEN TRIMER, (133) (GO)<br>RESPONSE TO BMP, (134) (GO)<br>REGULATION OF CARTILAGE<br>DEVELOPMENT, (135) (GO) RESPONSE<br>TO GROWTH FACTOR, (136) (GO)<br>POSITIVE REGULATION OF TYROSINE<br>PHOSPHORYLATION OF STAT PROTEIN,<br>(137) (GO) CYTOKINE SECRETION, (138) |
|--|--|-------------------------------------------------------------------------------------------------------------------------------------------------------------------------------------------------------------------------------------------------------------------------------------------------------------------------------------------------------------------------------------------------------------------------------------------------------------------------------------------------------------------------------------------------------------------------------------------------------------------------------------------------------------------------------------------------------------------------------------------------------------------------------------------------------------------------------------------------------------------------------------------------------------------------------------------------------------------------------------------------------------------------------------------------------------------------------------------------------------------------------------------------------------------------------------------------------------------------------------------------------------------------------------------------------------------------------------------------------------------------------------------------------------------------------------------------------------------------------------------------------------------------------------------------------------------------------------------------------------------------------------------------------------------------------------------------------------------------------------------------------------------------------------------------------------------------------------------------------------------------------------------------------------------------------------------------------------------------------------------------------------------------------------------------------------------------------------------------------------------------------------------------------------------------------------------|



|  |  |                                                                                                                                                                                                                                                                                                                                                                                                                                                                                                                                                                                                                                                                                                                                                                                                                                                                                                                                                                                                                                                                                                                                                                                                                                                                                                                                                                                                                                                                                                                                                                                                                                                                                                                                                                                                                                                                                                                                                                                              |
|--|--|----------------------------------------------------------------------------------------------------------------------------------------------------------------------------------------------------------------------------------------------------------------------------------------------------------------------------------------------------------------------------------------------------------------------------------------------------------------------------------------------------------------------------------------------------------------------------------------------------------------------------------------------------------------------------------------------------------------------------------------------------------------------------------------------------------------------------------------------------------------------------------------------------------------------------------------------------------------------------------------------------------------------------------------------------------------------------------------------------------------------------------------------------------------------------------------------------------------------------------------------------------------------------------------------------------------------------------------------------------------------------------------------------------------------------------------------------------------------------------------------------------------------------------------------------------------------------------------------------------------------------------------------------------------------------------------------------------------------------------------------------------------------------------------------------------------------------------------------------------------------------------------------------------------------------------------------------------------------------------------------|
|  |  | <p>(GO) CELL CHEMOTAXIS, (139) (GO) POSITIVE REGULATION OF MAPK CASCADE, (140) (GO) GLOMERULUS DEVELOPMENT, (141) (GO) POSITIVE REGULATION OF CELL DIFFERENTIATION, (142) (GO) POSITIVE REGULATION OF IMMUNE RESPONSE, (143) (GO) POSITIVE REGULATION OF CYTOKINE PRODUCTION, (144) (GO) REGULATION OF MYELOID CELL DIFFERENTIATION, (145) (GO) POSITIVE REGULATION OF PHOSPHORUS METABOLIC PROCESS, (146) (GO) CELL ADHESION MEDIATED BY INTEGRIN, (147) (GO) REGULATION OF INFLAMMATORY RESPONSE, (148) (GO) IMMUNE EFFECTOR PROCESS, (149) (GO) CHONDROCYTE DIFFERENTIATION, (150) (GO) OUTFLOW TRACT MORPHOGENESIS, (151) (GO) LYMPHOCYTE MEDIATED IMMUNITY, (152) (GO) ERK1 AND ERK2 CASCADE, (153) (GO) POSITIVE REGULATION OF T CELL PROLIFERATION, (154) (GO) CELLULAR RESPONSE TO LI(PID), (155) (GO) MESENCHYME DEVELOPMENT, (156) (GO) COAGULATION, (157) (GO) REGULATION OF RESPONSE TO EXTERNAL STIMULUS, (158) (GO) GRANULOCYTE MIGRATION, (159) (GO) BASEMENT MEMBRANE, (160) (GO) POSITIVE REGULATION OF HEMOPOIESIS, (161) (GO) POSITIVE REGULATION OF LEUKOCYTE DIFFERENTIATION, (162) (GO) REGULATION OF HEMOPOIESIS, (163) (GO) POSITIVE REGULATION OF EPITHELIAL CELL PROLIFERATION, (164) (GO) ENDOTHELIUM DEVELOPMENT, (165) (GO) ANCHORING JUNCTION, (166) (GO) NEGATIVE REGULATION OF CELL POPULATION PROLIFERATION, (167) (GO) TAXIS, (168) (GO) COMPLEMENT ACTIVATION, (169) (GO) NEGATIVE REGULATION OF CELL ADHESION, (170) (GO) POSITIVE REGULATION OF PROTEIN MODIFICATION PROCESS, (171) (GO) PEPTIDYL TYROSINE MODIFICATION, (172) (GO) REGULATION OF HUMORAL IMMUNE RESPONSE, (173) (GO) POSITIVE REGULATION OF LYMPHOCYTE DIFFERENTIATION, (174) (GO) REGULATION OF HEART MORPHOGENESIS, (175) (GO) I KAPPAB KINASE NF KAPPAB SIGNALING, (176) (GO) POSITIVE REGULATION OF PEPTIDYL TYROSINE PHOSPHORYLATION, (177) (GO) PHA(GO)CYTOSIS, (178) (GO) POSITIVE REGULATION OF TUMOR NECROSIS FACTOR SUPERFAMILY CYTOKINE PRODUCTION, (179) (GO) POSITIVE</p> |
|--|--|----------------------------------------------------------------------------------------------------------------------------------------------------------------------------------------------------------------------------------------------------------------------------------------------------------------------------------------------------------------------------------------------------------------------------------------------------------------------------------------------------------------------------------------------------------------------------------------------------------------------------------------------------------------------------------------------------------------------------------------------------------------------------------------------------------------------------------------------------------------------------------------------------------------------------------------------------------------------------------------------------------------------------------------------------------------------------------------------------------------------------------------------------------------------------------------------------------------------------------------------------------------------------------------------------------------------------------------------------------------------------------------------------------------------------------------------------------------------------------------------------------------------------------------------------------------------------------------------------------------------------------------------------------------------------------------------------------------------------------------------------------------------------------------------------------------------------------------------------------------------------------------------------------------------------------------------------------------------------------------------|

|         |                                                                                                                                                                                                                                                                                                                                                                                                                                                                                                                                                                                                                                                                                                                                                                                                                                                                                                                                                                                                                                                                                                                                                                                                                                                                                                                                                                                                                                                                                                                                                                                                                                                                                                                                                                                                                                        |                                                                                                                                                                                                                                                                                                                                                                                                                                                                                                                                                                                                                                                                                                                                                                                                 |
|---------|----------------------------------------------------------------------------------------------------------------------------------------------------------------------------------------------------------------------------------------------------------------------------------------------------------------------------------------------------------------------------------------------------------------------------------------------------------------------------------------------------------------------------------------------------------------------------------------------------------------------------------------------------------------------------------------------------------------------------------------------------------------------------------------------------------------------------------------------------------------------------------------------------------------------------------------------------------------------------------------------------------------------------------------------------------------------------------------------------------------------------------------------------------------------------------------------------------------------------------------------------------------------------------------------------------------------------------------------------------------------------------------------------------------------------------------------------------------------------------------------------------------------------------------------------------------------------------------------------------------------------------------------------------------------------------------------------------------------------------------------------------------------------------------------------------------------------------------|-------------------------------------------------------------------------------------------------------------------------------------------------------------------------------------------------------------------------------------------------------------------------------------------------------------------------------------------------------------------------------------------------------------------------------------------------------------------------------------------------------------------------------------------------------------------------------------------------------------------------------------------------------------------------------------------------------------------------------------------------------------------------------------------------|
|         |                                                                                                                                                                                                                                                                                                                                                                                                                                                                                                                                                                                                                                                                                                                                                                                                                                                                                                                                                                                                                                                                                                                                                                                                                                                                                                                                                                                                                                                                                                                                                                                                                                                                                                                                                                                                                                        | <p>REGULATION OF LEUKOCYTE MIGRATION, (180) (GO) REGULATION OF CELLULAR RESPONSE TO GROWTH FACTOR STIMULUS, (181) (GO) REGULATION OF ANATOMICAL STRUCTURE MORPHOGENESIS, (182) (GO) B CELL RECEPTOR SIGNALING PATHWAY, (183) (GO) MYELOID LEUKOCYTE MIGRATION, (184) (GO) POSITIVE REGULATION OF ERK1 AND ERK2 CASCADE, (185) (GO) INTEGRIN MEDIATED SIGNALING PATHWAY, (186) (GO) PROTEIN COMPLEX INVOLVED IN CELL ADHESION, (187) (GO) TRANSMEMBRANE RECEPTOR PROTEIN SERINE THREONINE KINASE SIGNALING PATHWAY, (188) (GO) ACTIVATION OF IMMUNE RESPONSE, (189) (GO) REGULATION OF ANTIGEN RECEPTOR MEDIATED SIGNALING PATHWAY, (190) (GO) MUSCLE SYSTEM PROCESS, (191) (GO) MESENCHYME MORPHOGENESIS, (192) (GO) INTERFERON GAMMA PRODUCTION, (193) (GO) REGULATION OF DEFENSE RESPONSE</p> |
| Down_AD | <p>(1) (H)K MYC TARGETS V1, (2) (H)K MTORC1 SIGNALING, (3) (H)K DNA REPAIR, (4) (H)K UNFOLDED PROTEIN RESPONSE, (5) (R) APC C CDH1 MEDIATED DEGRADATION OF CDC20 AND OTHER APC C CDH1 TARGETED PROTEINS IN LATE MITOSIS EARLY G1, (6) (R) ASSEMBLY OF THE PRE REPLICATIVE COMPLEX, (7) (R) CELL CYCLE CHECKPOINTS, (8) (R) DNA REPLICATION, (9) (R) METABOLISM OF RNA, (10) (R) MITOCHONDRIAL TRANSLATION, (11) (R) MITOTIC G2 G2 M PHASES, (12) (R) MITOTIC METAPHASE AND ANAPHASE, (13) (R) ORC1 REMOVAL FROM CHROMATIN, (14) (R) SEPARATION OF SISTER CHROMATIDS, (15) (R) SWITCHING OF ORIGINS TO A POST REPLICATIVE STATE, (16) (R) TRANSLATION, (17) (R) METABOLISM OF POLYAMINES, (18) (R) THE ROLE OF GTSE1 IN G2 M PROGRESSION AFTER G2 CHECKPOINT, (19) (R) APC C MEDIATED DEGRADATION OF CELL CYCLE PROTEINS, (20) (R) DNA REPLICATION PRE INITIATION, (21) (R) SCF SKP2 MEDIATED DEGRADATION OF P27 P21, (22) (R) S PHASE, (23) (R) G2 M CHECKPOINTS, (24) (R) NUCLEOTIDE EXCISION REPAIR, (25) (R) CYCLIN A CDK2 ASSOCIATED EVENTS AT S PHASE ENTRY, (26) (R) PROCESSING OF CAPPED INTRON CONTAINING PRE MRNA, (27) (R) G1 S DNA DAMAGE CHECKPOINTS, (28) (R) CELL CYCLE, (29) (R) M PHASE, (30) (R) CELL CYCLE MITOTIC, (31) (R) MRNA SPLICING, (32) (R) GLOBAL GENOME NUCLEOTIDE EXCISION REPAIR GG NER, (33) (R) MITOTIC G1 PHASE AND G1 S TRANSITION, (34) (R) TRNA PROCESSING, (35) (R) MRNA SPLICING MINOR PATHWAY, (36) (R) RRNA PROCESSING, (37) (R) VIRAL MESSENGER RNA SYNTHESIS, (38) (R) RRNA MODIFICATION IN THE NUCLEUS AND CYTOSOL, (39) (R) DUAL INCISION IN TC NER, (40) (GO) ANAPHASE PROMOTING COMPLEX DEPENDENT CATABOLIC PROCESS, (41) (GO) CATALYTIC ACTIVITY ACTING ON RNA, (42) (GO) CATALYTIC COMPLEX, (43) (GO) CELLULAR PROTEIN CONTAINING COMPLEX ASSEMBLY, (44) (GO) ENVELOPE, (45) (GO)</p> |                                                                                                                                                                                                                                                                                                                                                                                                                                                                                                                                                                                                                                                                                                                                                                                                 |

|  |                                                                                                                                                                                                                                                                                                                                                                                                                                                                                                                                                                                                                                                                                                                                                                                                                                                                                                                                                                                                                                                                                                                                                                                                                                                                                                                                                                                                                                                                                                                                                                                                                                                                                                                                                                                                                                                                                                           |  |
|--|-----------------------------------------------------------------------------------------------------------------------------------------------------------------------------------------------------------------------------------------------------------------------------------------------------------------------------------------------------------------------------------------------------------------------------------------------------------------------------------------------------------------------------------------------------------------------------------------------------------------------------------------------------------------------------------------------------------------------------------------------------------------------------------------------------------------------------------------------------------------------------------------------------------------------------------------------------------------------------------------------------------------------------------------------------------------------------------------------------------------------------------------------------------------------------------------------------------------------------------------------------------------------------------------------------------------------------------------------------------------------------------------------------------------------------------------------------------------------------------------------------------------------------------------------------------------------------------------------------------------------------------------------------------------------------------------------------------------------------------------------------------------------------------------------------------------------------------------------------------------------------------------------------------|--|
|  | <p>HYDROLASE ACTIVITY ACTING ON ACID ANHYDRIDES, (46) (GO) MITOCHONDRIAL ENVELOPE, (47) (GO) MITOCHONDRIAL GENE EXPRESSION, (48) (GO) MITOCHONDRIAL MATRIX, (49) (GO) MITOCHONDRIAL PROTEIN COMPLEX, (50) (GO) MITOCHONDRIAL TRANSLATION, (51) (GO) MITOCHONDRIAL TRANSLATIONAL TERMINATION, (52) (GO) MITOCHONDRION, (53) (GO) NCRNA METABOLIC PROCESS, (54) (GO) NCRNA PROCESSING, (55) (GO) ORGANELLAR RIBOSOME, (56) (GO) ORGANELLE INNER MEMBRANE, (57) (GO) RIBONUCLEOPROTEIN COMPLEX, (58) (GO) RIBONUCLEOPROTEIN COMPLEX BIOGENESIS, (59) (GO) RIBOSOME BIOGENESIS, (60) (GO) RNA BINDING, (61) (GO) RNA PROCESSING, (62) (GO) TRANSLATIONAL ELONGATION, (63) (GO) TRANSLATIONAL TERMINATION, (64) (GO) TRNA METABOLIC PROCESS, (65) (GO) CELLULAR PROTEIN COMPLEX DISASSEMBLY, (66) (GO) RIBONUCLEOTIDE BINDING, (67) (GO) REGULATION OF CELL CYCLE G2 M PHASE TRANSITION, (68) (GO) CATALYTIC ACTIVITY ACTING ON A TRNA, (69) (GO) CELL CYCLE G2 M PHASE TRANSITION, (70) (GO) NUCLEOLUS, (71) (GO) NEGATIVE REGULATION OF CELL CYCLE G2 M PHASE TRANSITION, (72) (GO) POSTTRANSCRIPTIONAL REGULATION OF GENE EXPRESSION, (73) (GO) RRNA METABOLIC PROCESS, (74) (GO) MITOCHONDRIAL LARGE RIBOSOMAL SUBUNIT, (75) (GO) TRANSFERASE COMPLEX, (76) (GO) MRNA METABOLIC PROCESS, (77) (GO) RIBONUCLEOPROTEIN COMPLEX SUBUNIT ORGANIZATION, (78) (GO) MICROTUBULE, (79) (GO) MICROTUBULE CYTOSKELETON, (80) (GO) ADENYL NUCLEOTIDE BINDING, (81) (GO) MICROTUBULE BASED PROCESS, (82) (GO) TRNA PROCESSING, (83) (GO) RNA SPLICING VIA TRANSESTERIFICATION REACTIONS, (84) (GO) NUCLEOTIDE EXCISION REPAIR, (85) (GO) DRUG BINDING, (86) (GO) ATPASE ACTIVITY, (87) (GO) MRNA PROCESSING, (88) (GO) SPLICEOSOMAL TRI SNRNP COMPLEX, (89) (GO) RNA LOCALIZATION, (90) (GO) RETROGRADE VESICLE MEDIATED TRANSPORT (GO)LGI TO ENDOPLASMIC RETICULUM, (91) (GO) RNA SPLICING, (92) (GO) PRERIBOSOME</p> |  |
|--|-----------------------------------------------------------------------------------------------------------------------------------------------------------------------------------------------------------------------------------------------------------------------------------------------------------------------------------------------------------------------------------------------------------------------------------------------------------------------------------------------------------------------------------------------------------------------------------------------------------------------------------------------------------------------------------------------------------------------------------------------------------------------------------------------------------------------------------------------------------------------------------------------------------------------------------------------------------------------------------------------------------------------------------------------------------------------------------------------------------------------------------------------------------------------------------------------------------------------------------------------------------------------------------------------------------------------------------------------------------------------------------------------------------------------------------------------------------------------------------------------------------------------------------------------------------------------------------------------------------------------------------------------------------------------------------------------------------------------------------------------------------------------------------------------------------------------------------------------------------------------------------------------------------|--|

Table S6. Jointly deregulated pathways in AD and BRCA.

|       | Up_BRCA                                                                                                                                                                                                                                                                                                                                                                                                                                                                                  | Down_BRCA                                                                                                                                                                                                                                                                                                                                                                                                                                                                                                          |
|-------|------------------------------------------------------------------------------------------------------------------------------------------------------------------------------------------------------------------------------------------------------------------------------------------------------------------------------------------------------------------------------------------------------------------------------------------------------------------------------------------|--------------------------------------------------------------------------------------------------------------------------------------------------------------------------------------------------------------------------------------------------------------------------------------------------------------------------------------------------------------------------------------------------------------------------------------------------------------------------------------------------------------------|
| Up_AD | <p>(1) (H)K ALLOGRAFT REJECTION, (2) (R) TRANSCRIPTIONAL REGULATION OF GRANULOPOIESIS, (3) (R) RUNX1 REGULATES GENES INVOLVED IN MEGAKARYOCYTE DIFFERENTIATION AND PLATELET FUNCTION, (4) (GO) CHROMOSOME, (5) (GO) NUCLEAR CHROMOSOME, (6) (GO) DEFENSE RESPONSE TO OTHER ORGANISM, (7) (GO) REGULATION OF IMMUNE RESPONSE, (8) (GO) INNATE IMMUNE RESPONSE, (9) (GO) IMMUNE EFFECTOR PROCESS, (10) (GO) CHROMATIN BINDING, (11) (GO) REPRODUCTION, (12) (GO) DNA PACKAGING COMPLEX</p> | <p>(1) (H)K MYOGENESIS, (2) (H)K TNFA SIGNALING VIA NFKB, (3) (H)K HYPOXIA, (4) NABA CORE MATRISOME, (5) NABA MATRISOME, (6) NABA ECM GLYCOPROTEINS, (7) (GO) ANATOMICAL STRUCTURE FORMATION INVOLVED IN MORPHOGENESIS, (8) (GO) ANIMAL ORGAN MORPHOGENESIS, (9) (GO) BIOLOGICAL ADHESION, (10) (GO) BLOOD VESSEL MORPHOGENESIS, (11) (GO) CARDIOVASCULAR SYSTEM DEVELOPMENT, (12) (GO) CELL MOTILITY, (13) (GO) CIRCULATORY SYSTEM DEVELOPMENT, (14) (GO) COLLAGEN CONTAINING EXTRACELLULAR MATRIX, (15) (GO)</p> |

DNA BINDING TRANSCRIPTION  
ACTIVATOR ACTIVITY, (16) (GO) DNA  
BINDING TRANSCRIPTION FACTOR  
ACTIVITY RNA POLYMERASE II  
SPECIFIC, (17) (GO) EXTRACELLULAR  
MATRIX, (18) (GO) LOCOMOTION, (19)  
(GO) NEGATIVE REGULATION OF  
DEVELOPMENTAL PROCESS, (20) (GO)  
NEGATIVE REGULATION OF  
MULTICELLULAR ORGANISMAL  
PROCESS, (21) (GO) POSITIVE  
REGULATION OF DEVELOPMENTAL  
PROCESS, (22) (GO) POSITIVE  
REGULATION OF TRANSCRIPTION BY  
RNA POLYMERASE II, (23) (GO) POSITIVE  
REGULATION OF VASCULATURE  
DEVELOPMENT, (24) (GO) REGULATION  
OF CELL POPULATION PROLIFERATION,  
(25) (GO) REGULATION OF  
VASCULATURE DEVELOPMENT, (26)  
(GO) RESPONSE TO LI(PID), (27) (GO)  
TUBE DEVELOPMENT, (28) (GO) TUBE  
MORPHOGENESIS, (29) (GO)  
UROGENITAL SYSTEM DEVELOPMENT,  
(30) (GO) POSITIVE REGULATION OF  
MULTICELLULAR ORGANISMAL  
PROCESS, (31) (GO) RENAL SYSTEM  
DEVELOPMENT, (32) (GO) MUSCLE  
STRUCTURE DEVELOPMENT, (33) (GO)  
HEART DEVELOPMENT, (34) (GO)  
REGULATION OF CELL  
DIFFERENTIATION, (35) (GO) KIDNEY  
EPITHELIUM DEVELOPMENT, (36) (GO)  
REGULATION OF CELLULAR  
COMPONENT MOVEMENT, (37) (GO)  
MUSCLE ORGAN DEVELOPMENT, (38)  
(GO) EPITHELIAL CELL PROLIFERATION,  
(39) (GO) POSITIVE REGULATION OF  
LOCOMOTION, (40) (GO) CELL  
SUBSTRATE ADHESION, (41) (GO)  
SIGNALING RECEPTOR BINDING, (42)  
(GO) RESPONSE TO GROWTH FACTOR,  
(43) (GO) POSITIVE REGULATION OF  
MAPK CASCADE, (44) (GO) POSITIVE  
REGULATION OF CELL  
DIFFERENTIATION, (45) (GO) POSITIVE  
REGULATION OF PHOSPHORUS  
METABOLIC PROCESS, (46) (GO)  
MULTICELLULAR ORGANISMAL  
HOMEOSTASIS, (47) (GO) POSITIVE  
REGULATION OF EPITHELIAL CELL  
PROLIFERATION, (48) (GO)  
ENDOTHELIUM DEVELOPMENT, (49)  
(GO) ANCHORING JUNCTION, (50) (GO)  
NEGATIVE REGULATION OF CELL  
POPULATION PROLIFERATION, (51) (GO)  
TAXIS, (52) (GO) REGULATION OF FAT  
CELL DIFFERENTIATION, (53) (GO)  
REGULATION OF ANATOMICAL  
STRUCTURE MORPHOGENESIS, (54)  
(GO) MUSCLE SYSTEM PROCESS, (55)  
(GO) MESENCHYME MORPHOGENESIS

Down\_AD

(1) (H)K MYC TARGETS V1, (2) (H)K MTORC1 SIGNALING, (3) (H)K DNA REPAIR, (4) (H)K UNFOLDED PROTEIN RESPONSE, (5) (K) PROTEASOME, (6) (R) APC C CDH1 MEDIATED DEGRADATION OF CDC20 AND OTHER APC C CDH1 TARGETED PROTEINS IN LATE MITOSIS EARLY G1, (7) (R) ASPARAGINE N LINKED GLYCOSYLATION, (8) (R) ASSEMBLY OF THE PRE REPLICATIVE COMPLEX, (9) (R) CELL CYCLE CHECKPOINTS, (10) (R) DNA REPLICATION, (11) (R) HIV INFECTION, (12) (R) HOST INTERACTIONS OF HIV FACTORS, (13) (R) METABOLISM OF RNA, (14) (R) MITOCHONDRIAL TRANSLATION, (15) (R) MITOTIC G2 G2 M PHASES, (16) (R) MITOTIC METAPHASE AND ANAPHASE, (17) (R) ORC1 REMOVAL FROM CHROMATIN, (18) (R) SEPARATION OF SISTER CHROMATIDS, (19) (R) SWITCHING OF ORIGINS TO A POST REPLICATIVE STATE, (20) (R) METABOLISM OF POLYAMINES, (21) (R) POST TRANSLATIONAL PROTEIN MODIFICATION, (22) (R) THE ROLE OF GTSE1 IN G2 M PROGRESSION AFTER G2 CHECKPOINT, (23) (R) APC C MEDIATED DEGRADATION OF CELL CYCLE PROTEINS, (24) (R) DNA REPLICATION PRE INITIATION, (25) (R) STABILIZATION OF P53, (26) (R) SCF SKP2 MEDIATED DEGRADATION OF P27 P21, (27) (R) S PHASE, (28) (R) G2 M CHECKPOINTS, (29) (R) NUCLEOTIDE EXCISION REPAIR, (30) (R) CYCLIN A CDK2 ASSOCIATED EVENTS AT S PHASE ENTRY, (31) (R) PROCESSING OF CAPPED INTRON CONTAINING PRE MRNA, (32) (R) G1 S DNA DAMAGE CHECKPOINTS, (33) (R) CELL CYCLE, (34) (R) M PHASE, (35) (R) UCH PROTEINASES, (36) (R) HIV LIFE CYCLE, (37) (R) CELL CYCLE MITOTIC, (38) (R) (GO)LGI TO ER RETROGRADE TRANSPORT, (39) (R) MRNA SPLICING, (40) (R) GLOBAL GENOME NUCLEOTIDE EXCISION REPAIR GG NER, (41) (R) MITOTIC G1 PHASE AND G1 S TRANSITION, (42) (R) UB SPECIFIC PROCESSING PROTEASES, (43) (R) MHC CLASS II ANTIGEN PRESENTATION, (44) (R) DEUBIQUITINATION, (45) (R) TRNA PROCESSING, (46) (R) ANTIGEN PROCESSING CROSS PRESENTATION, (47) (R) VIRAL MESSENGER RNA SYNTHESIS, (48) (GO) ANAPHASE PROMOTING COMPLEX DEPENDENT CATABOLIC PROCESS, (49) (GO) CATALYTIC ACTIVITY ACTING ON RNA, (50) (GO) CATALYTIC COMPLEX, (51) (GO) CELLULAR PROTEIN CONTAINING COMPLEX ASSEMBLY, (52) (GO) ENDOPEPTIDASE COMPLEX, (53) (GO) HYDROLASE ACTIVITY ACTING ON ACID ANHYDRIDES, (54) (GO) MITOCHONDRIAL GENE EXPRESSION, (55) (GO) MITOCHONDRIAL TRANSLATION, (56) (GO) NCRNA METABOLIC PROCESS, (57) (GO) NCRNA PROCESSING, (58) (GO) PROTEIN CONTAINING COMPLEX ASSEMBLY, (59) (GO) PROTEIN MODIFICATION BY SMALL PROTEIN CONJUGATION, (60) (GO) PROTEIN MODIFICATION BY SMALL PROTEIN CONJUGATION OR REMOVAL, (61) (GO) RIBONUCLEOPROTEIN COMPLEX BIOGENESIS, (62) (GO) RNA BINDING, (63) (GO) RNA PROCESSING, (64) (GO) TRNA METABOLIC PROCESS, (65) (GO) RIBONUCLEOTIDE BINDING, (66) (GO) REGULATION OF CELL CYCLE G2 M PHASE TRANSITION, (67) (GO) CATALYTIC ACTIVITY ACTING ON A TRNA, (68) (GO) CELL CYCLE G2 M PHASE TRANSITION, (69) (GO) NUCLEOLUS, (70) (GO) TRANSFERASE COMPLEX, (71) (GO) ORGANELLE LOCALIZATION, (72) (GO) MICROTUBULE, (73) (GO) MICROTUBULE CYTOSKELETON, (74) (GO) ADENYL NUCLEOTIDE BINDING, (75) (GO) ANTIGEN PROCESSING AND PRESENTATION OF PEPTIDE ANTIGEN, (76) (GO) MICROTUBULE BASED PROCESS, (77) (GO) PROTEIN

(1) (GO) SYNAPSE

|  |                                                                                                                                                                                                                                                                                                    |  |
|--|----------------------------------------------------------------------------------------------------------------------------------------------------------------------------------------------------------------------------------------------------------------------------------------------------|--|
|  | CONTAINING COMPLEX LOCALIZATION, (78) (GO) DRUG BINDING, (79) (GO) ATPASE ACTIVITY, (80) (GO) ESTABLISHMENT OF ORGANELLE LOCALIZATION, (81) (GO) RNA LOCALIZATION, (82) (GO) RETROGRADE VESICLE MEDIATED TRANSPORT (GO)LGI TO ENDOPLASMIC RETICULUM, (83) (GO) ANTIGEN PROCESSING AND PRESENTATION |  |
|--|----------------------------------------------------------------------------------------------------------------------------------------------------------------------------------------------------------------------------------------------------------------------------------------------------|--|

Table S7. Jointly deregulated pathways in AD and CERV.

|         | Up_CERV                                                                                                                                                                                                                                                                                                                                                                                                                                                                                                                                                                                                                                                                                                                                                                                                                                                                                                                                                                                                                                                                                                                                                         | Down_CERV                                                                                                                                                                                                                                                                                                                                                                                                                                                                                                                                                                                                                                                                                                                                                                                                                                                                                                                                                                                                                                                                                                  |
|---------|-----------------------------------------------------------------------------------------------------------------------------------------------------------------------------------------------------------------------------------------------------------------------------------------------------------------------------------------------------------------------------------------------------------------------------------------------------------------------------------------------------------------------------------------------------------------------------------------------------------------------------------------------------------------------------------------------------------------------------------------------------------------------------------------------------------------------------------------------------------------------------------------------------------------------------------------------------------------------------------------------------------------------------------------------------------------------------------------------------------------------------------------------------------------|------------------------------------------------------------------------------------------------------------------------------------------------------------------------------------------------------------------------------------------------------------------------------------------------------------------------------------------------------------------------------------------------------------------------------------------------------------------------------------------------------------------------------------------------------------------------------------------------------------------------------------------------------------------------------------------------------------------------------------------------------------------------------------------------------------------------------------------------------------------------------------------------------------------------------------------------------------------------------------------------------------------------------------------------------------------------------------------------------------|
| Up_AD   | (1) (H)K INFLAMMATORY RESPONSE, (2) (H)K ALLOGRAFT REJECTION, (3) (H)K IL6 JAK STAT3 SIGNALING, (4) (R) TRANSCRIPTIONAL REGULATION OF GRANULOPOIESIS, (5) (GO) ADAPTIVE IMMUNE RESPONSE, (6) (GO) CHROMATIN, (7) (GO) CHROMOSOME, (8) (GO) CYTOKINE MEDIATED SIGNALING PATHWAY, (9) (GO) DOUBLE STRANDED DNA BINDING, (10) (GO) IMMUNE SYSTEM DEVELOPMENT, (11) (GO) NEGATIVE REGULATION OF BIOSYNTHETIC PROCESS, (12) (GO) NEGATIVE REGULATION OF NUCLEOBASE CONTAINING COMPOUND METABOLIC PROCESS, (13) (GO) NEGATIVE REGULATION OF RNA BIOSYNTHETIC PROCESS, (14) (GO) NUCLEAR CHROMOSOME, (15) (GO) POSITIVE REGULATION OF CELLULAR BIOSYNTHETIC PROCESS, (16) (GO) POSITIVE REGULATION OF NUCLEOBASE CONTAINING COMPOUND METABOLIC PROCESS, (17) (GO) POSITIVE REGULATION OF RNA METABOLIC PROCESS, (18) (GO) SEQUENCE SPECIFIC DNA BINDING, (19) (GO) TRANSCRIPTION REGULATOR ACTIVITY, (20) (GO) RESPONSE TO CYTOKINE, (21) (GO) DEFENSE RESPONSE TO OTHER ORGANISM, (22) (GO) INNATE IMMUNE RESPONSE, (23) (GO) POSITIVE REGULATION OF IMMUNE RESPONSE, (24) (GO) IMMUNE EFFECTOR PROCESS, (25) (GO) CHROMATIN BINDING, (26) (GO) DNA PACKAGING COMPLEX | (1) (H)K MYOGENESIS, (2) (H)K KRAS SIGNALING DN, (3) NABA CORE MATRISOME, (4) NABA MATRISOME, (5) NABA MATRISOME ASSOCIATED, (6) NABA SECRETED FACTORS, (7) NABA ECM GLYCOPROTEINS, (8) (R) KERATINIZATION, (9) (R) GPCR LIGAND BINDING, (10) (R) FORMATION OF THE CORNIFIED ENVELOPE, (11) (GO) BIOLOGICAL ADHESION, (12) (GO) CELL CELL ADHESION, (13) (GO) COLLAGEN CONTAINING EXTRACELLULAR MATRIX, (14) (GO) E(PID)ERMIS DEVELOPMENT, (15) (GO) EPITHELIAL CELL DIFFERENTIATION, (16) (GO) EPITHELIUM DEVELOPMENT, (17) (GO) EXTRACELLULAR MATRIX, (18) (GO) INTRINSIC COMPONENT OF PLASMA MEMBRANE, (19) (GO) MOLECULAR TRANSDUCER ACTIVITY, (20) (GO) SKIN DEVELOPMENT, (21) (GO) TUBE DEVELOPMENT, (22) (GO) E(PID)ERMAL CELL DIFFERENTIATION, (23) (GO) KIDNEY EPITHELIUM DEVELOPMENT, (24) (GO) KERATINOCYTE DIFFERENTIATION, (25) (GO) G PROTEIN COUPLED RECEPTOR ACTIVITY, (26) (GO) MESONEPHROS DEVELOPMENT, (27) (GO) KERATINIZATION, (28) (GO) PEPTIDE RECEPTOR ACTIVITY, (29) (GO) MAMMARY GLAND MORPHOGENESIS, (30) (GO) CORNIFICATION, (31) (GO) SENSORY PERCEPTION OF CHEMICAL STIMULUS |
| Down_AD | (1) (H)K MYC TARGETS V1, (2) (H)K MTORC1 SIGNALING, (3) (H)K DNA REPAIR, (4) (H)K UNFOLDED PROTEIN RESPONSE, (5) (K) PROTEASOME, (6) (R) ANTIGEN PROCESSING UBIQUITINATION PROTEASOME DEGRADATION, (7) (R) APC C CDH1 MEDIATED DEGRADATION OF CDC20 AND OTHER APC C CDH1 TARGETED PROTEINS IN LATE MITOSIS EARLY G1, (8) (R) ASSEMBLY OF THE PRE REPLICATIVE COMPLEX, (9) (R) AUF1 HNRNP D0 BINDS AND DESTABILIZES MRNA, (10) (R) CELL CYCLE CHECKPOINTS, (11) (R) CLASS I MHC MEDIATED ANTIGEN PROCESSING PRESENTATION, (12) (R) DEGRADATION OF DVL, (13) (R) DNA REPLICATION, (14) (R) HIV INFECTION, (15) (R) HOST INTERACTIONS OF HIV FACTORS, (16) (R) METABOLISM OF RNA, (17) (R) MITOCHONDRIAL TRANSLATION, (18) (R) MITOTIC G2 G2 M PHASES, (19) (R) MITOTIC METAPHASE AND ANAPHASE, (20)                                                                                                                                                                                                                                                                                                                                                               | (1) (R) NEURONAL SYSTEM, (2) (R) TRANSMISSION ACROSS CHEMICAL SYNAPSES, (3) (GO) NEURON PROJECTION, (4) (GO) NEURON TO NEURON SYNAPSE, (5) (GO) POSTSYNAPSE, (6) (GO) SYNAPSE, (7) (GO) SYNAPTIC MEMBRANE, (8) (GO) SYNAPTIC SIGNALING, (9) (GO) REGULATION OF TRANS SYNAPTIC SIGNALING, (10) (GO) POSTSYNAPTIC MEMBRANE, (11) (GO) BEHAVIOR, (12) (GO) PRESYNAPTIC MEMBRANE, (13) (GO) CATION TRANSMEMBRANE TRANSPORT, (14) (GO) POSTSYNAPTIC SPECIALIZATION MEMBRANE, (15) (GO)                                                                                                                                                                                                                                                                                                                                                                                                                                                                                                                                                                                                                          |



(R) NEGATIVE REGULATION OF NOTCH4 SIGNALING, (21) (R) ORC1 REMOVAL FROM CHROMATIN, (22) (R) REGULATION OF PTEN STABILITY AND ACTIVITY, (23) (R) SEPARATION OF SISTER CHROMATIDS, (24) (R) SWITCHING OF ORIGINS TO A POST REPLICATIVE STATE, (25) (R) DEGRADATION OF AXIN, (26) (R) METABOLISM OF POLYAMINES, (27) (R) POST TRANSLATIONAL PROTEIN MODIFICATION, (28) (R) THE ROLE OF GTSE1 IN G2 M PROGRESSION AFTER G2 CHECKPOINT, (29) (R) APC C MEDIATED DEGRADATION OF CELL CYCLE PROTEINS, (30) (R) CELLULAR RESPONSE TO HYPOXIA, (31) (R) DNA REPLICATION PRE INITIATION, (32) (R) STABILIZATION OF P53, (33) (R) ORGANELLE BIOGENESIS AND MAINTENANCE, (34) (R) SCF SKP2 MEDIATED DEGRADATION OF P27 P21, (35) (R) REGULATION OF RUNX3 EXPRESSION AND ACTIVITY, (36) (R) S PHASE, (37) (R) G2 M CHECKPOINTS, (38) (R) REGULATION OF MRNA STABILITY BY PROTEINS THAT BIND AU RICH ELEMENTS, (39) (R) NUCLEOTIDE EXCISION REPAIR, (40) (R) CYCLIN A CDK2 ASSOCIATED EVENTS AT S PHASE ENTRY, (41) (R) PROCESSING OF CAPPED INTRON CONTAINING PRE MRNA, (42) (R) G1 S DNA DAMAGE CHECKPOINTS, (43) (R) CELL CYCLE, (44) (R) M PHASE, (45) (R) TRANSCRIPTION COUPLED NUCLEOTIDE EXCISION REPAIR TC NER, (46) (R) UCH PROTEINASES, (47) (R) HIV LIFE CYCLE, (48) (R) CELL CYCLE MITOTIC, (49) (R) PTEN REGULATION, (50) (R) CELLULAR RESPONSES TO EXTERNAL STIMULI, (51) (R) MRNA SPLICING, (52) (R) GLOBAL GENOME NUCLEOTIDE EXCISION REPAIR GG NER, (53) (R) MITOTIC G1 PHASE AND G1 S TRANSITION, (54) (R) UB SPECIFIC PROCESSING PROTEASES, (55) (R) INFECTIOUS DISEASE, (56) (K) RNA DEGRADATION, (57) (K) UBIQUITIN MEDIATED PROTEOLYSIS, (58) (R) DEUBIQUITINATION, (59) (R) TRNA PROCESSING, (60) (R) MRNA SPLICING MINOR PATHWAY, (61) (R) CILIUM ASSEMBLY, (62) (R) FORMATION OF INCISION COMPLEX IN GG NER, (63) (R) ANTIGEN PROCESSING CROSS PRESENTATION, (64) (R) VIRAL MESSENGER RNA SYNTHESIS, (65) (R) DUAL INCISION IN TC NER, (66) (GO) ANAPHASE PROMOTING COMPLEX DEPENDENT CATABOLIC PROCESS, (67) (GO) ATP METABOLIC PROCESS, (68) (GO) CATALYTIC ACTIVITY ACTING ON RNA, (69) (GO) CATALYTIC COMPLEX, (70) (GO) CELLULAR MACROMOLECULE CATABOLIC PROCESS, (71) (GO) CELLULAR MACROMOLECULE LOCALIZATION, (72) (GO) CELLULAR PROTEIN CATABOLIC PROCESS, (73) (GO) CELLULAR PROTEIN CONTAINING COMPLEX ASSEMBLY, (74) (GO) ENDOPEPTIDASE COMPLEX, (75) (GO) ENVELOPE, (76) (GO) HYDROLASE ACTIVITY ACTING ON ACID ANHYDRIDES, (77) (GO) INTRACELLULAR TRANSPORT, (78) (GO) MITOCHONDRIAL GENE EXPRESSION, (79) (GO) MITOCHONDRIAL PROTEIN COMPLEX, (80) (GO) MITOCHONDRIAL TRANSLATION, (81) (GO) MITOCHONDRIAL TRANSLATIONAL TERMINATION, (82) (GO) MITOCHONDRION, (83) (GO) MITOCHONDRION ORGANIZATION, (84) (GO) MODIFICATION DEPENDENT MACROMOLECULE CATABOLIC PROCESS, (85) (GO) NCRNA METABOLIC PROCESS, (86) (GO) NCRNA PROCESSING, (87) (GO) ORGANELLAR RIBOSOME, (88) (GO) ORGANELLE INNER MEMBRANE, (89) (GO) PEPTIDASE COMPLEX, (90) (GO) PEPTIDE BIOSYNTHETIC PROCESS, (91) (GO) PROTEASOMAL PROTEIN CATABOLIC PROCESS, (92) (GO) PROTEIN CONTAINING COMPLEX ASSEMBLY, (93) (GO) PROTEIN MODIFICATION BY SMALL PROTEIN CONJUGATION, (94) (GO) PROTEIN MODIFICATION BY SMALL PROTEIN

POSTSYNAPTIC DENSITY MEMBRANE, (16) (GO) INORGANIC ION TRANSMEMBRANE TRANSPORT, (17) (GO) ION TRANSMEMBRANE TRANSPORT

|  |                                                                                                                                                                                                                                                                                                                                                                                                                                                                                                                                                                                                                                                                                                                                                                                                                                                                                                                                                                                                                                                                                                                                                                                                                                                                                                                                                                                                                                                                                                                                                                                                                                                                                                                                                                                                                                                                                                                                                                                                                                                                                                                                                                                                                                                                                                                                                                                                                                                                                                                                                                   |  |
|--|-------------------------------------------------------------------------------------------------------------------------------------------------------------------------------------------------------------------------------------------------------------------------------------------------------------------------------------------------------------------------------------------------------------------------------------------------------------------------------------------------------------------------------------------------------------------------------------------------------------------------------------------------------------------------------------------------------------------------------------------------------------------------------------------------------------------------------------------------------------------------------------------------------------------------------------------------------------------------------------------------------------------------------------------------------------------------------------------------------------------------------------------------------------------------------------------------------------------------------------------------------------------------------------------------------------------------------------------------------------------------------------------------------------------------------------------------------------------------------------------------------------------------------------------------------------------------------------------------------------------------------------------------------------------------------------------------------------------------------------------------------------------------------------------------------------------------------------------------------------------------------------------------------------------------------------------------------------------------------------------------------------------------------------------------------------------------------------------------------------------------------------------------------------------------------------------------------------------------------------------------------------------------------------------------------------------------------------------------------------------------------------------------------------------------------------------------------------------------------------------------------------------------------------------------------------------|--|
|  | <p>CONJUGATION OR REMOVAL, (95) (GO)<br/> RIBONUCLEOPROTEIN COMPLEX, (96) (GO)<br/> RIBONUCLEOPROTEIN COMPLEX BIOGENESIS, (97) (GO)<br/> RIBOSOME BIOGENESIS, (98) (GO) RNA BINDING, (99) (GO)<br/> RNA PROCESSING, (100) (GO) TRANSLATIONAL<br/> TERMINATION, (101) (GO) TRNA METABOLIC PROCESS, (102)<br/> (GO) RIBONUCLEOTIDE BINDING, (103) (GO) REGULATION<br/> OF CELL CYCLE G2 M PHASE TRANSITION, (104) (GO)<br/> CATALYTIC ACTIVITY ACTING ON A TRNA, (105) (GO) CELL<br/> CYCLE G2 M PHASE TRANSITION, (106) (GO) PROTEIN<br/> POLYUBIQUITINATION, (107) (GO) PROTEIN CATABOLIC<br/> PROCESS, (108) (GO) NUCLEOLUS, (109) (GO) NEGATIVE<br/> REGULATION OF CELL CYCLE G2 M PHASE TRANSITION,<br/> (110) (GO) PROTEIN LOCALIZATION TO ORGANELLE, (111)<br/> (GO) PROTEIN MODIFICATION BY SMALL PROTEIN<br/> REMOVAL, (112) (GO) POSTTRANSCRIPTIONAL<br/> REGULATION OF GENE EXPRESSION, (113) (GO) RRNA<br/> METABOLIC PROCESS, (114) (GO) UBIQUITIN LIKE PROTEIN<br/> TRANSFERASE ACTIVITY, (115) (GO) MITOCHONDRIAL<br/> LARGE RIBOSOMAL SUBUNIT, (116) (GO) TRANSFERASE<br/> COMPLEX, (117) (GO) MRNA METABOLIC PROCESS, (118) (GO)<br/> RIBONUCLEOPROTEIN COMPLEX SUBUNIT<br/> ORGANIZATION, (119) (GO) ORGANELLE LOCALIZATION,<br/> (120) (GO) TRANSCRIPTION COUPLED NUCLEOTIDE<br/> EXCISION REPAIR, (121) (GO) UNFOLDED PROTEIN BINDING,<br/> (122) (GO) MICROTUBULE, (123) (GO) MICROTUBULE<br/> CYTOSKELETON, (124) (GO) ADENYL NUCLEOTIDE BINDING,<br/> (125) (GO) MACROMOLECULE CATABOLIC PROCESS, (126)<br/> (GO) MICROTUBULE BASED PROCESS, (127) (GO) TRNA<br/> PROCESSING, (128) (GO) RNA SPLICING VIA<br/> TRANSESTERIFICATION REACTIONS, (129) (GO) UBIQUITIN<br/> LIGASE COMPLEX, (130) (GO) REGULATION OF MRNA<br/> CATABOLIC PROCESS, (131) (GO) ANTIGEN PROCESSING<br/> AND PRESENTATION OF EXOGENOUS PEPTIDE ANTIGEN<br/> VIA MHC CLASS I, (132) (GO) RIBONUCLEOPROTEIN<br/> COMPLEX BINDING, (133) (GO) NUCLEOTIDE EXCISION<br/> REPAIR, (134) (GO) PROTEIN CONTAINING COMPLEX<br/> LOCALIZATION, (135) (GO) RNA CATABOLIC PROCESS, (136)<br/> (GO) NUCLEAR ENVELOPE, (137) (GO) DRUG BINDING, (138)<br/> (GO) REGULATION OF CATABOLIC PROCESS, (139) (GO)<br/> ATPASE ACTIVITY, (140) (GO) ESTABLISHMENT OF<br/> ORGANELLE LOCALIZATION, (141) (GO) UBIQUITIN LIKE<br/> PROTEIN LIGASE BINDING, (142) (GO) MRNA PROCESSING,<br/> (143) (GO) SPLICEOSOMAL TRI SNRNP COMPLEX, (144) (GO)<br/> RNA LOCALIZATION, (145) (GO) REGULATION OF CELLULAR<br/> CATABOLIC PROCESS, (146) (GO) RNA SPLICING, (147) (GO)<br/> PRERIBOSOME</p> |  |
|--|-------------------------------------------------------------------------------------------------------------------------------------------------------------------------------------------------------------------------------------------------------------------------------------------------------------------------------------------------------------------------------------------------------------------------------------------------------------------------------------------------------------------------------------------------------------------------------------------------------------------------------------------------------------------------------------------------------------------------------------------------------------------------------------------------------------------------------------------------------------------------------------------------------------------------------------------------------------------------------------------------------------------------------------------------------------------------------------------------------------------------------------------------------------------------------------------------------------------------------------------------------------------------------------------------------------------------------------------------------------------------------------------------------------------------------------------------------------------------------------------------------------------------------------------------------------------------------------------------------------------------------------------------------------------------------------------------------------------------------------------------------------------------------------------------------------------------------------------------------------------------------------------------------------------------------------------------------------------------------------------------------------------------------------------------------------------------------------------------------------------------------------------------------------------------------------------------------------------------------------------------------------------------------------------------------------------------------------------------------------------------------------------------------------------------------------------------------------------------------------------------------------------------------------------------------------------|--|

**Table S8.** Jointly deregulated pathways in AD and CRCA.

|       | Up_CRCA                                                                                                                                                                                                                                                                                                                 | Down_CRCA                                                                                                                                                                                                                                                                                                                                                     |
|-------|-------------------------------------------------------------------------------------------------------------------------------------------------------------------------------------------------------------------------------------------------------------------------------------------------------------------------|---------------------------------------------------------------------------------------------------------------------------------------------------------------------------------------------------------------------------------------------------------------------------------------------------------------------------------------------------------------|
| Up_AD | <p>(1) (H)K EPITHELIAL MESENCHYMAL TRANSITION, (2) (R)<br/> COLLAGEN FORMATION, (3) (R) ASSEMBLY OF COLLAGEN<br/> FIBRILS AND OTHER MULTIMERIC STRUCTURES, (4) (GO)<br/> CHROMOSOME, (5) (GO) NUCLEAR CHROMOSOME, (6)<br/> (GO) CHROMATIN BINDING, (7) (GO) ENDOPLASMIC<br/> RETICULUM LUMEN, (8) (GO) REPRODUCTION</p> | <p>(1) (R) IMMUNOREGULATORY<br/> INTERACTIONS BETWEEN A LYMPHOID<br/> AND A NON LYMPHOID CELL, (2) (K)<br/> HEMATOPOIETIC CELL LINEAGE, (3) (K)<br/> CELL ADHESION MOLECULES CAMS, (4)<br/> (GO) ADAPTIVE IMMUNE RESPONSE, (5)<br/> (GO) BIOLOGICAL ADHESION, (6) (GO)<br/> CELL ACTIVATION, (7) (GO) CELL CELL<br/> ADHESION, (8) (GO) CELL SURFACE, (9)</p> |



|         |                                                                                                                                                                                                                                                                                                                                                                                                                                                                                                                                                                                                                                                                                                                                                                                                                                                                                                                                                                                                                                                                                                                                                                                                                                                                                                                                                                                                                                                                                                                                                                                |                                                                                                                                                                                                                                                                                                                                                                                                                                                                                                                                                                                                                                                                                                                                                                                                                                                                                                                                                                                           |
|---------|--------------------------------------------------------------------------------------------------------------------------------------------------------------------------------------------------------------------------------------------------------------------------------------------------------------------------------------------------------------------------------------------------------------------------------------------------------------------------------------------------------------------------------------------------------------------------------------------------------------------------------------------------------------------------------------------------------------------------------------------------------------------------------------------------------------------------------------------------------------------------------------------------------------------------------------------------------------------------------------------------------------------------------------------------------------------------------------------------------------------------------------------------------------------------------------------------------------------------------------------------------------------------------------------------------------------------------------------------------------------------------------------------------------------------------------------------------------------------------------------------------------------------------------------------------------------------------|-------------------------------------------------------------------------------------------------------------------------------------------------------------------------------------------------------------------------------------------------------------------------------------------------------------------------------------------------------------------------------------------------------------------------------------------------------------------------------------------------------------------------------------------------------------------------------------------------------------------------------------------------------------------------------------------------------------------------------------------------------------------------------------------------------------------------------------------------------------------------------------------------------------------------------------------------------------------------------------------|
|         |                                                                                                                                                                                                                                                                                                                                                                                                                                                                                                                                                                                                                                                                                                                                                                                                                                                                                                                                                                                                                                                                                                                                                                                                                                                                                                                                                                                                                                                                                                                                                                                | <p>(GO) EXTERNAL SIDE OF PLASMA MEMBRANE, (10) (GO) INFLAMMATORY RESPONSE, (11) (GO) INTRINSIC COMPONENT OF PLASMA MEMBRANE, (12) (GO) LEUKOCYTE CELL CELL ADHESION, (13) (GO) LEUKOCYTE MIGRATION, (14) (GO) LEUKOCYTE PROLIFERATION, (15) (GO) LYMPHOCYTE ACTIVATION, (16) (GO) MOLECULAR TRANSDUCER ACTIVITY, (17) (GO) NEGATIVE REGULATION OF IMMUNE SYSTEM PROCESS, (18) (GO) POSITIVE REGULATION OF IMMUNE SYSTEM PROCESS, (19) (GO) REGULATION OF CELL ADHESION, (20) (GO) REGULATION OF IMMUNE SYSTEM PROCESS, (21) (GO) T CELL ACTIVATION, (22) (GO) REGULATION OF T CELL ACTIVATION, (23) (GO) REGULATION OF IMMUNE RESPONSE, (24) (GO) RECEPTOR COMPLEX, (25) (GO) SIDE OF MEMBRANE, (26) (GO) POSITIVE REGULATION OF CELL DIFFERENTIATION, (27) (GO) POSITIVE REGULATION OF IMMUNE RESPONSE, (28) (GO) REGULATION OF RESPONSE TO EXTERNAL STIMULUS, (29) (GO) B CELL RECEPTOR SIGNALING PATHWAY, (30) (GO) ACTIVATION OF IMMUNE RESPONSE, (31) (GO) MUSCLE SYSTEM PROCESS</p> |
| Down_AD | <p>(1) (H)K MYC TARGETS V1, (2) (H)K MTORC1 SIGNALING, (3) (H)K DNA REPAIR, (4) (H)K UNFOLDED PROTEIN RESPONSE, (5) (K) PROTEASOME, (6) (R) APC C CDH1 MEDIATED DEGRADATION OF CDC20 AND OTHER APC C CDH1 TARGETED PROTEINS IN LATE MITOSIS EARLY G1, (7) (R) ASSEMBLY OF THE PRE REPLICATIVE COMPLEX, (8) (R) AUF1 HNRNP D0 BINDS AND DESTABILIZES MRNA, (9) (R) CELL CYCLE CHECKPOINTS, (10) (R) CROSS PRESENTATION OF SOLUBLE EXOGENOUS ANTIGENS ENDOSOMES, (11) (R) DEGRADATION OF DVL, (12) (R) DNA REPLICATION, (13) (R) HIV INFECTION, (14) (R) HOST INTERACTIONS OF HIV FACTORS, (15) (R) METABOLISM OF RNA, (16) (R) MITOCHONDRIAL TRANSLATION, (17) (R) MITOTIC G2 G2 M PHASES, (18) (R) MITOTIC METAPHASE AND ANAPHASE, (19) (R) NEGATIVE REGULATION OF NOTCH4 SIGNALING, (20) (R) ORC1 REMOVAL FROM CHROMATIN, (21) (R) REGULATION OF PTEN STABILITY AND ACTIVITY, (22) (R) SEPARATION OF SISTER CHROMATIDS, (23) (R) SWITCHING OF ORIGINS TO A POST REPLICATIVE STATE, (24) (R) TRANSLATION, (25) (R) DEGRADATION OF AXIN, (26) (R) METABOLISM OF POLYAMINES, (27) (R) THE ROLE OF GTSE1 IN G2 M PROGRESSION AFTER G2 CHECKPOINT, (28) (R) APC C MEDIATED DEGRADATION OF CELL CYCLE PROTEINS, (29) (R) DNA REPLICATION PRE INITIATION, (30) (R) STABILIZATION OF P53, (31) (R) SCF SKP2 MEDIATED DEGRADATION OF P27 P21, (32) (R) REGULATION OF RUNX3 EXPRESSION AND ACTIVITY, (33) (R) S PHASE, (34) (R) REGULATION OF EXPRESSION OF SLITS AND ROBOS, (35) (R) G2 M CHECKPOINTS, (36) (R) DECTIN 1 MEDIATED NONCANONICAL NF KB SIGNALING, (37) (R) SIGNALING</p> | <p>(1) (H)K OXIDATIVE PHOSPHORYLATION, (2) (H)K FATTY ACID METABOLISM, (3) (K) ALZHEIMERS DISEASE, (4) (K) HUNTINGTONS DISEASE, (5) (K) OXIDATIVE PHOSPHORYLATION, (6) (K) PARKINSONS DISEASE, (7) (R) RESPIRATORY ELECTRON TRANSPORT, (8) (R) RESPIRATORY ELECTRON TRANSPORT ATP SYNTHESIS BY CHEMIOSMOTIC COUPLING AND HEAT PRODUCTION BY UNCOUPLING PROTEINS, (9) (R) THE CITRIC ACID TCA CYCLE AND RESPIRATORY ELECTRON TRANSPORT, (10) (R) NEURONAL SYSTEM, (11) (R) TRANSMISSION ACROSS CHEMICAL SYNAPSES, (12) (R) PYRUVATE METABOLISM AND CITRIC ACID TCA CYCLE, (13) (K) CARDIAC MUSCLE CONTRACTION, (14) (R) NEUROTRANSMITTER RECEPTORS AND POSTSYNAPTIC SIGNAL TRANSMISSION, (15) (GO) ATP SYNTHESIS COUPLED ELECTRON TRANSPORT, (16) (GO) MEMBRANE PROTEIN COMPLEX, (17) (GO) NEURON PROJECTION, (18) (GO) POSTSYNAPSE, (19) (GO) RESPIRASOME, (20) (GO) SOMATODENDRITIC COMPARTMENT, (21) (GO) SYNAPSE, (22) (GO) SYNAPTIC SIGNALING, (23) (GO) DENDRITIC TREE,</p>          |

BY ROBO RECEPTORS, (38) (R) REGULATION OF MRNA STABILITY BY PROTEINS THAT BIND AU RICH ELEMENTS, (39) (R) NUCLEOTIDE EXCISION REPAIR, (40) (R) CYCLIN A CDK2 ASSOCIATED EVENTS AT S PHASE ENTRY, (41) (R) PROCESSING OF CAPPED INTRON CONTAINING PRE MRNA, (42) (R) G1 S DNA DAMAGE CHECKPOINTS, (43) (R) FORMATION OF TC NER PRE INCISION COMPLEX, (44) (R) CELL CYCLE, (45) (R) M PHASE, (46) (R) TRANSCRIPTION COUPLED NUCLEOTIDE EXCISION REPAIR TC NER, (47) (R) TRNA AMINOACYLATION, (48) (R) UCH PROTEINASES, (49) (R) HIV LIFE CYCLE, (50) (R) CELL CYCLE MITOTIC, (51) (R) PTEN REGULATION, (52) (R) CELLULAR RESPONSES TO EXTERNAL STIMULI, (53) (K) AMINOACYL TRNA BIOSYNTHESIS, (54) (R) MRNA SPLICING, (55) (R) GLOBAL GENOME NUCLEOTIDE EXCISION REPAIR GG NER, (56) (R) MITOTIC G1 PHASE AND G1 S TRANSITION, (57) (R) COOPERATION OF PREFOLDIN AND TRIC CCT IN ACTIN AND TUBULIN FOLDING, (58) (K) RNA DEGRADATION, (59) (K) UBIQUITIN MEDIATED PROTEOLYSIS, (60) (R) TRNA PROCESSING, (61) (R) MRNA SPLICING MINOR PATHWAY, (62) (R) RRNA PROCESSING, (63) (R) CILIUM ASSEMBLY, (64) (R) FORMATION OF INCISION COMPLEX IN GG NER, (65) (R) VIRAL MESSENGER RNA SYNTHESIS, (66) (R) RRNA MODIFICATION IN THE NUCLEUS AND CYTOSOL, (67) (R) DUAL INCISION IN TC NER, (68) (GO) AMIDE BIOSYNTHETIC PROCESS, (69) (GO) ANAPHASE PROMOTING COMPLEX DEPENDENT CATABOLIC PROCESS, (70) (GO) CATALYTIC ACTIVITY ACTING ON RNA, (71) (GO) CATALYTIC COMPLEX, (72) (GO) CELLULAR AMIDE METABOLIC PROCESS, (73) (GO) CELLULAR MACROMOLECULE CATABOLIC PROCESS, (74) (GO) CELLULAR PROTEIN CONTAINING COMPLEX ASSEMBLY, (75) (GO) ENDOPEPTIDASE COMPLEX, (76) (GO) HYDROLASE ACTIVITY ACTING ON ACID ANHYDRIDES, (77) (GO) MITOCHONDRIAL GENE EXPRESSION, (78) (GO) MITOCHONDRIAL MATRIX, (79) (GO) MITOCHONDRIAL TRANSLATION, (80) (GO) MITOCHONDRIAL TRANSLATIONAL TERMINATION, (81) (GO) NCRNA METABOLIC PROCESS, (82) (GO) NCRNA PROCESSING, (83) (GO) ORGANELLAR RIBOSOME, (84) (GO) ORGANONITROGEN COMPOUND BIOSYNTHETIC PROCESS, (85) (GO) PEPTIDASE COMPLEX, (86) (GO) PEPTIDE BIOSYNTHETIC PROCESS, (87) (GO) PEPTIDE METABOLIC PROCESS, (88) (GO) PROTEIN CONTAINING COMPLEX ASSEMBLY, (89) (GO) PROTEIN MODIFICATION BY SMALL PROTEIN CONJUGATION, (90) (GO) PROTEIN MODIFICATION BY SMALL PROTEIN CONJUGATION OR REMOVAL, (91) (GO) RIBONUCLEOPROTEIN COMPLEX, (92) (GO) RIBONUCLEOPROTEIN COMPLEX BIOGENESIS, (93) (GO) RIBOSOME, (94) (GO) RIBOSOME BIOGENESIS, (95) (GO) RNA BINDING, (96) (GO) RNA PROCESSING, (97) (GO) TRANSLATIONAL ELONGATION, (98) (GO) TRANSLATIONAL TERMINATION, (99) (GO) TRNA METABOLIC PROCESS, (100) (GO) CELLULAR AMINO ACID METABOLIC PROCESS, (101) (GO) REGULATION OF CELLULAR AMINO ACID METABOLIC PROCESS, (102) (GO) RIBOSOMAL SUBUNIT, (103) (GO) RIBONUCLEOTIDE BINDING, (104) (GO) REGULATION OF CELL CYCLE G2 M PHASE TRANSITION, (105) (GO) CATALYTIC ACTIVITY ACTING ON A TRNA, (106) (GO) CELL CYCLE G2 M PHASE TRANSITION, (107) (GO) NUCLEOLUS, (108) (GO) NEGATIVE REGULATION OF CELL CYCLE G2 M PHASE TRANSITION, (109) (GO) PROTEIN LOCALIZATION TO ORGANELLE, (110)

(24) (GO) REGULATION OF TRANS SYNAPTIC SIGNALING, (25) (GO) REGULATION OF SYNAPTIC PLASTICITY, (26) (GO) CELL BODY, (27) (GO) POSTSYNAPTIC MEMBRANE, (28) (GO) MONOVALENT INORGANIC CATION TRANSPORT, (29) (GO) MONOVALENT INORGANIC CATION TRANSMEMBRANE TRANSPORTER ACTIVITY, (30) (GO) CATION TRANSMEMBRANE TRANSPORT, (31) (GO) TRANSMEMBRANE TRANSPORT, (32) (GO) INORGANIC ION TRANSMEMBRANE TRANSPORT, (33) (GO) ION TRANSMEMBRANE TRANSPORT, (34) (GO) GLUTAMATE RECEPTOR SIGNALING PATHWAY

|  |                                                                                                                                                                                                                                                                                                                                                                                                                                                                                                                                                                                                                                                                                                                                                                                                                                                                                                                                                                                                                                                                                                                                                                                                                                                                                                                                                                                                                                                                                                                                                                 |  |
|--|-----------------------------------------------------------------------------------------------------------------------------------------------------------------------------------------------------------------------------------------------------------------------------------------------------------------------------------------------------------------------------------------------------------------------------------------------------------------------------------------------------------------------------------------------------------------------------------------------------------------------------------------------------------------------------------------------------------------------------------------------------------------------------------------------------------------------------------------------------------------------------------------------------------------------------------------------------------------------------------------------------------------------------------------------------------------------------------------------------------------------------------------------------------------------------------------------------------------------------------------------------------------------------------------------------------------------------------------------------------------------------------------------------------------------------------------------------------------------------------------------------------------------------------------------------------------|--|
|  | (GO) PROTEIN MODIFICATION BY SMALL PROTEIN REMOVAL, (111) (GO) POSTTRANSCRIPTIONAL REGULATION OF GENE EXPRESSION, (112) (GO) RRNA METABOLIC PROCESS, (113) (GO) STRUCTURAL CONSTITUENT OF RIBOSOME, (114) (GO) TRANSFERASE COMPLEX, (115) (GO) AMINO ACID ACTIVATION, (116) (GO) MRNA METABOLIC PROCESS, (117) (GO) RIBONUCLEOPROTEIN COMPLEX SUBUNIT ORGANIZATION, (118) (GO) LIGASE ACTIVITY, (119) (GO) PROTEIN FOLDING, (120) (GO) ORGANELLE LOCALIZATION, (121) (GO) TRANSCRIPTION COUPLED NUCLEOTIDE EXCISION REPAIR, (122) (GO) UNFOLDED PROTEIN BINDING, (123) (GO) LARGE RIBOSOMAL SUBUNIT, (124) (GO) MICROTUBULE, (125) (GO) MICROTUBULE CYTOSKELETON, (126) (GO) ADENYL NUCLEOTIDE BINDING, (127) (GO) LIGASE ACTIVITY FORMING CARBON OXYGEN BONDS, (128) (GO) MACROMOLECULE CATABOLIC PROCESS, (129) (GO) MICROTUBULE BASED PROCESS, (130) (GO) TRNA PROCESSING, (131) (GO) RNA SPLICING VIA TRANSESTERIFICATION REACTIONS, (132) (GO) REGULATION OF MRNA CATABOLIC PROCESS, (133) (GO) RIBONUCLEOPROTEIN COMPLEX BINDING, (134) (GO) NUCLEOTIDE EXCISION REPAIR, (135) (GO) PROTEIN CONTAINING COMPLEX LOCALIZATION, (136) (GO) TRANSLATION FACTOR ACTIVITY RNA BINDING, (137) (GO) RNA CATABOLIC PROCESS, (138) (GO) NUCLEAR ENVELOPE, (139) (GO) DRUG BINDING, (140) (GO) ATPASE ACTIVITY, (141) (GO) CYTOPLASMIC TRANSLATION, (142) (GO) TRNA BINDING, (143) (GO) MRNA PROCESSING, (144) (GO) SPLICEOSOMAL TRI SNRNP COMPLEX, (145) (GO) RNA LOCALIZATION, (146) (GO) RNA SPLICING, (147) (GO) PRERIBOSOME, (148) (GO) SMALL RIBOSOMAL SUBUNIT |  |
|--|-----------------------------------------------------------------------------------------------------------------------------------------------------------------------------------------------------------------------------------------------------------------------------------------------------------------------------------------------------------------------------------------------------------------------------------------------------------------------------------------------------------------------------------------------------------------------------------------------------------------------------------------------------------------------------------------------------------------------------------------------------------------------------------------------------------------------------------------------------------------------------------------------------------------------------------------------------------------------------------------------------------------------------------------------------------------------------------------------------------------------------------------------------------------------------------------------------------------------------------------------------------------------------------------------------------------------------------------------------------------------------------------------------------------------------------------------------------------------------------------------------------------------------------------------------------------|--|

**Table S9.** Jointly deregulated pathways in AD and HANC.

|       | Up_HANC                                                                                                                                                                                                                                                                                                                                                                                                                                                                                                                                                                                                                                                                                                                                                                                                                                                                                                                                                                                                                                                                                                                                                            | Down_HANC                                                                                                            |
|-------|--------------------------------------------------------------------------------------------------------------------------------------------------------------------------------------------------------------------------------------------------------------------------------------------------------------------------------------------------------------------------------------------------------------------------------------------------------------------------------------------------------------------------------------------------------------------------------------------------------------------------------------------------------------------------------------------------------------------------------------------------------------------------------------------------------------------------------------------------------------------------------------------------------------------------------------------------------------------------------------------------------------------------------------------------------------------------------------------------------------------------------------------------------------------|----------------------------------------------------------------------------------------------------------------------|
| Up_AD | (1) (H)K INFLAMMATORY RESPONSE, (2) (H)K EPITHELIAL MESENCHYMAL TRANSITION, (3) (H)K IL6 JAK STAT3 SIGNALING, (4) (H)K TNFA SIGNALING VIA NFKB, (5) (R) EXTRACELLULAR MATRIX ORGANIZATION, (6) (R) CELL SURFACE INTERACTIONS AT THE VASCULAR WALL, (7) (R) COLLAGEN FORMATION, (8) (K) ECM RECEPTOR INTERACTION, (9) (R) ECM PROTEOGLYCANS, (10) (R) ASSEMBLY OF COLLAGEN FIBRILS AND OTHER MULTIMERIC STRUCTURES, (11) (K) PATHWAYS IN CANCER, (12) (R) NON INTEGRIN MEMBRANE ECM INTERACTIONS, (13) (PID) INTEGRIN1 PATHWAY, (14) (R) INTEGRIN CELL SURFACE INTERACTIONS, (15) (R) TRANSCRIPTIONAL REGULATION OF GRANULOPOIESIS, (16) (R) DEGRADATION OF THE EXTRACELLULAR MATRIX, (17) (R) COLLAGEN DEGRADATION, (18) (R) SIGNALING BY INTERLEUKINS, (19) (R) SYNDECAN INTERACTIONS, (20) (GO) ANIMAL ORGAN MORPHOGENESIS, (21) (GO) CHROMOSOME, (22) (GO) CYTOKINE MEDIATED SIGNALING PATHWAY, (23) (GO) DEFENSE RESPONSE, (24) (GO) EMBRYO DEVELOPMENT, (25) (GO) EXTRACELLULAR STRUCTURE ORGANIZATION, (26) (GO) IMMUNE SYSTEM DEVELOPMENT, (27) (GO) NUCLEAR CHROMOSOME, (28) (GO) POSITIVE REGULATION OF CELLULAR BIOSYNTHETIC PROCESS, (29) (GO) POSITIVE | (1) (R) KERATINIZATION, (2) (R) FORMATION OF THE CORNIFIED ENVELOPE, (3) (GO) KERATINIZATION, (4) (GO) CORNIFICATION |

|         |                                                                                                                                                                                                                                                                                                                                                                                                                                                                                                                                                                                                                                                                                                                                                                                                                                                                                                                                                                                                                                                                                                                                                                                                                                                                                                                                                                                                                                                                                                                                                                                                                                                                                                                                                                                                                                                                                                                                                                                                                                                                                                                                                                                                                                                                                                                                                                                                                                                                                                                                         |                                                                               |
|---------|-----------------------------------------------------------------------------------------------------------------------------------------------------------------------------------------------------------------------------------------------------------------------------------------------------------------------------------------------------------------------------------------------------------------------------------------------------------------------------------------------------------------------------------------------------------------------------------------------------------------------------------------------------------------------------------------------------------------------------------------------------------------------------------------------------------------------------------------------------------------------------------------------------------------------------------------------------------------------------------------------------------------------------------------------------------------------------------------------------------------------------------------------------------------------------------------------------------------------------------------------------------------------------------------------------------------------------------------------------------------------------------------------------------------------------------------------------------------------------------------------------------------------------------------------------------------------------------------------------------------------------------------------------------------------------------------------------------------------------------------------------------------------------------------------------------------------------------------------------------------------------------------------------------------------------------------------------------------------------------------------------------------------------------------------------------------------------------------------------------------------------------------------------------------------------------------------------------------------------------------------------------------------------------------------------------------------------------------------------------------------------------------------------------------------------------------------------------------------------------------------------------------------------------------|-------------------------------------------------------------------------------|
|         | <p>REGULATION OF NUCLEOBASE CONTAINING COMPOUND METABOLIC PROCESS, (30) (GO) RESPONSE TO BIOTIC STIMULUS, (31) (GO) RESPONSE TO CYTOKINE, (32) (GO) EMBRYO DEVELOPMENT ENDING IN BIRTH OR EGG HATCHING, (33) (GO) DEFENSE RESPONSE TO OTHER ORGANISM, (34) (GO) TISSUE MORPHOGENESIS, (35) (GO) INNATE IMMUNE RESPONSE, (36) (GO) CELL ADHESION MEDIATED BY INTEGRIN, (37) (GO) IMMUNE EFFECTOR PROCESS, (38) (GO) MORPHOGENESIS OF AN EPITHELIUM, (39) (GO) BASEMENT MEMBRANE, (40) (GO) ENDOPLASMIC RETICULUM LUMEN, (41) (GO) REPRODUCTION, (42) (GO) REGULATION OF DEFENSE RESPONSE</p>                                                                                                                                                                                                                                                                                                                                                                                                                                                                                                                                                                                                                                                                                                                                                                                                                                                                                                                                                                                                                                                                                                                                                                                                                                                                                                                                                                                                                                                                                                                                                                                                                                                                                                                                                                                                                                                                                                                                             |                                                                               |
| Down_AD | <p>(1) (H)K MYC TARGETS V1, (2) (H)K MTORC1 SIGNALING, (3) (H)K DNA REPAIR, (4) (H)K UNFOLDED PROTEIN RESPONSE, (5) (K) PROTEASOME, (6) (R) ANTIGEN PROCESSING UBIQUITINATION PROTEASOME DEGRADATION, (7) (R) APC C CDH1 MEDIATED DEGRADATION OF CDC20 AND OTHER APC C CDH1 TARGETED PROTEINS IN LATE MITOSIS EARLY G1, (8) (R) ASSEMBLY OF THE PRE REPLICATIVE COMPLEX, (9) (R) AUF1 HNRNP D0 BINDS AND DESTABILIZES MRNA, (10) (R) CELL CYCLE CHECKPOINTS, (11) (R) CLASS I MHC MEDIATED ANTIGEN PROCESSING PRESENTATION, (12) (R) CROSS PRESENTATION OF SOLUBLE EXOGENOUS ANTIGENS ENDOSOMES, (13) (R) DEFECTIVE CFTR CAUSES CYSTIC FIBROSIS, (14) (R) DEGRADATION OF DVL, (15) (R) DEGRADATION OF GLI1 BY THE PROTEASOME, (16) (R) DNA REPLICATION, (17) (R) HEDGEHOG LIGAND BIOGENESIS, (18) (R) HIV INFECTION, (19) (R) HOST INTERACTIONS OF HIV FACTORS, (20) (R) METABOLISM OF RNA, (21) (R) MITOCHONDRIAL TRANSLATION, (22) (R) MITOTIC G2 G2 M PHASES, (23) (R) MITOTIC METAPHASE AND ANAPHASE, (24) (R) NEGATIVE REGULATION OF NOTCH4 SIGNALING, (25) (R) ORC1 REMOVAL FROM CHROMATIN, (26) (R) REGULATION OF PTEN STABILITY AND ACTIVITY, (27) (R) REGULATION OF RAS BY GAPS, (28) (R) REGULATION OF RUNX2 EXPRESSION AND ACTIVITY, (29) (R) SEPARATION OF SISTER CHROMATIDS, (30) (R) SWITCHING OF ORIGINS TO A POST REPLICATIVE STATE, (31) (R) DEGRADATION OF AXIN, (32) (R) METABOLISM OF POLYAMINES, (33) (R) POST TRANSLATIONAL PROTEIN MODIFICATION, (34) (R) THE ROLE OF GTSE1 IN G2 M PROGRESSION AFTER G2 CHECKPOINT, (35) (R) APC C MEDIATED DEGRADATION OF CELL CYCLE PROTEINS, (36) (R) CELLULAR RESPONSE TO HYPOXIA, (37) (R) DNA REPLICATION PRE INITIATION, (38) (R) STABILIZATION OF P53, (39) (R) SCF SKP2 MEDIATED DEGRADATION OF P27 P21, (40) (R) REGULATION OF RUNX3 EXPRESSION AND ACTIVITY, (41) (R) S PHASE, (42) (R) G2 M CHECKPOINTS, (43) (R) ASYMMETRIC LOCALIZATION OF PCP PROTEINS, (44) (R) DECTIN 1 MEDIATED NONCANONICAL NF KB SIGNALING, (45) (R) REGULATION OF MRNA STABILITY BY PROTEINS THAT BIND AU RICH ELEMENTS, (46) (R) ABC TRANSPORTER DISORDERS, (47) (R) ABC FAMILY PROTEINS MEDIATED TRANSPORT, (48) (R) HEDGEHOG OFF STATE, (49) (R) NUCLEOTIDE EXCISION REPAIR, (50) (R) FCERI MEDIATED NF KB ACTIVATION, (51) (R) CYCLIN A CDK2 ASSOCIATED EVENTS AT S PHASE ENTRY, (52) (R) DOWNSTREAM SIGNALING EVENTS OF B CELL RECEPTOR BCR, (53) (R) PROCESSING OF CAPPED INTRON CONTAINING PRE MRNA, (54) (R) G1 S DNA DAMAGE CHECKPOINTS, (55) (R) CELL CYCLE, (56) (R) PCP CE</p> | <p>(1) (GO) OXIDATION REDUCTION PROCESS, (2) (GO) OXIDOREDUCTASE ACTIVITY</p> |

PATHWAY, (57) (R) M PHASE, (58) (R) UCH PROTEINASES, (59) (R) HIV LIFE CYCLE, (60) (R) MAPK6 MAPK4 SIGNALING, (61) (R) HEDGEHOG ON STATE, (62) (R) SIGNALING BY NOTCH4, (63) (R) CELL CYCLE MITOTIC, (64) (R) PTEN REGULATION, (65) (R) CELLULAR RESPONSES TO EXTERNAL STIMULI, (66) (R) MRNA SPLICING, (67) (R) MITOTIC G1 PHASE AND G1 S TRANSITION, (68) (R) DEGRADATION OF BETA CATENIN BY THE DESTRUCTION COMPLEX, (69) (R) UB SPECIFIC PROCESSING PROTEASES, (70) (R) FC EPSILON RECEPTOR FCERI SIGNALING, (71) (R) INFECTIOUS DISEASE, (72) (R) DEUBIQUITINATION, (73) (R) TRNA PROCESSING, (74) (R) RRNA PROCESSING, (75) (R) CILIMUM ASSEMBLY, (76) (R) ANTIGEN PROCESSING CROSS PRESENTATION, (77) (R) VIRAL MESSENGER RNA SYNTHESIS, (78) (R) RRNA MODIFICATION IN THE NUCLEUS AND CYTOSOL, (79) (GO) ANAPHASE PROMOTING COMPLEX DEPENDENT CATABOLIC PROCESS, (80) (GO) CATALYTIC ACTIVITY ACTING ON RNA, (81) (GO) CATALYTIC COMPLEX, (82) (GO) CELLULAR MACROMOLECULE CATABOLIC PROCESS, (83) (GO) CELLULAR PROTEIN CATABOLIC PROCESS, (84) (GO) CELLULAR PROTEIN CONTAINING COMPLEX ASSEMBLY, (85) (GO) ENDOPEPTIDASE COMPLEX, (86) (GO) HYDROLASE ACTIVITY ACTING ON ACID ANHYDRIDES, (87) (GO) MITOCHONDRIAL GENE EXPRESSION, (88) (GO) MITOCHONDRIAL TRANSLATION, (89) (GO) NCRNA METABOLIC PROCESS, (90) (GO) NCRNA PROCESSING, (91) (GO) ORGANELLAR RIBOSOME, (92) (GO) ORGANONITROGEN COMPOUND BIOSYNTHETIC PROCESS, (93) (GO) PEPTIDASE COMPLEX, (94) (GO) PEPTIDE BIOSYNTHETIC PROCESS, (95) (GO) PROTEASOMAL PROTEIN CATABOLIC PROCESS, (96) (GO) PROTEIN CONTAINING COMPLEX ASSEMBLY, (97) (GO) PROTEIN MODIFICATION BY SMALL PROTEIN CONJUGATION, (98) (GO) PROTEIN MODIFICATION BY SMALL PROTEIN CONJUGATION OR REMOVAL, (99) (GO) RIBONUCLEOPROTEIN COMPLEX, (100) (GO) RIBONUCLEOPROTEIN COMPLEX BIOGENESIS, (101) (GO) RIBOSOME BIOGENESIS, (102) (GO) RNA BINDING, (103) (GO) RNA PROCESSING, (104) (GO) SCF DEPENDENT PROTEASOMAL UBIQUITIN DEPENDENT PROTEIN CATABOLIC PROCESS, (105) (GO) TRANSLATIONAL ELONGATION, (106) (GO) TRANSLATIONAL TERMINATION, (107) (GO) TRNA METABOLIC PROCESS, (108) (GO) REGULATION OF CELLULAR AMINO ACID METABOLIC PROCESS, (109) (GO) RIBONUCLEOTIDE BINDING, (110) (GO) REGULATION OF CELL CYCLE G2 M PHASE TRANSITION, (111) (GO) CELL CYCLE G2 M PHASE TRANSITION, (112) (GO) NUCLEOLUS, (113) (GO) NEGATIVE REGULATION OF CELL CYCLE G2 M PHASE TRANSITION, (114) (GO) PROTEIN MODIFICATION BY SMALL PROTEIN REMOVAL, (115) (GO) POSTTRANSCRIPTIONAL REGULATION OF GENE EXPRESSION, (116) (GO) RRNA METABOLIC PROCESS, (117) (GO) REGULATION OF CELLULAR AMINE METABOLIC PROCESS, (118) (GO) MITOCHONDRIAL LARGE RIBOSOMAL SUBUNIT, (119) (GO) TRANSFERASE COMPLEX, (120) (GO) MRNA METABOLIC PROCESS, (121) (GO) RIBONUCLEOPROTEIN COMPLEX SUBUNIT ORGANIZATION, (122) (GO) ORGANELLE LOCALIZATION, (123) (GO) REGULATION OF TRANSCRIPTION FROM RNA POLYMERASE II PROMOTER IN RESPONSE TO HYPOXIA, (124) (GO) MICROTUBULE, (125) (GO) MICROTUBULE CYTOSKELETON, (126) (GO) ADENYL

|  |                                                                                                                                                                                                                                                                                                                                                                                                                                                                                                                                                                                                                                                                                                                                                                                                                                                                                                                                                                                                                                                                |  |
|--|----------------------------------------------------------------------------------------------------------------------------------------------------------------------------------------------------------------------------------------------------------------------------------------------------------------------------------------------------------------------------------------------------------------------------------------------------------------------------------------------------------------------------------------------------------------------------------------------------------------------------------------------------------------------------------------------------------------------------------------------------------------------------------------------------------------------------------------------------------------------------------------------------------------------------------------------------------------------------------------------------------------------------------------------------------------|--|
|  | <p>NUCLEOTIDE BINDING, (127) (GO) ANTIGEN PROCESSING AND PRESENTATION OF PEPTIDE ANTIGEN, (128) (GO) MACROMOLECULE CATABOLIC PROCESS, (129) (GO) MICROTUBULE BASED PROCESS, (130) (GO) RNA SPLICING VIA TRANSESTERIFICATION REACTIONS, (131) (GO) REGULATION OF MRNA CATABOLIC PROCESS, (132) (GO) ANTIGEN PROCESSING AND PRESENTATION OF EXOGENOUS PEPTIDE ANTIGEN VIA MHC CLASS I, (133) (GO) RIBONUCLEOPROTEIN COMPLEX BINDING, (134) (GO) RNA CATABOLIC PROCESS, (135) (GO) CELLULAR COMPONENT DISASSEMBLY, (136) (GO) FC EPSILON RECEPTOR SIGNALING PATHWAY, (137) (GO) AMINE METABOLIC PROCESS, (138) (GO) NUCLEAR ENVELOPE, (139) (GO) DRUG BINDING, (140) (GO) REGULATION OF CATABOLIC PROCESS, (141) (GO) ATPASE ACTIVITY, (142) (GO) MRNA PROCESSING, (143) (GO) RNA LOCALIZATION, (144) (GO) INTERLEUKIN 1 MEDIATED SIGNALING PATHWAY, (145) (GO) REGULATION OF CELLULAR CATABOLIC PROCESS, (146) (GO) RNA SPLICING, (147) (GO) ANTIGEN PROCESSING AND PRESENTATION, (148) (GO) POST TRANSLATIONAL PROTEIN MODIFICATION, (149) (GO) PRERIBOSOME</p> |  |
|--|----------------------------------------------------------------------------------------------------------------------------------------------------------------------------------------------------------------------------------------------------------------------------------------------------------------------------------------------------------------------------------------------------------------------------------------------------------------------------------------------------------------------------------------------------------------------------------------------------------------------------------------------------------------------------------------------------------------------------------------------------------------------------------------------------------------------------------------------------------------------------------------------------------------------------------------------------------------------------------------------------------------------------------------------------------------|--|

**Table S10.** Jointly deregulated pathways in AD and LGCA.

|       | Up_LGCA                                      | Down_LGCA                                                                                                                                                                                                                                                                                                                                                                                                                                                                                                                                                                                                                                                                                                                                                                                                                                                                                                                                                                                                                                                                                                                                    |
|-------|----------------------------------------------|----------------------------------------------------------------------------------------------------------------------------------------------------------------------------------------------------------------------------------------------------------------------------------------------------------------------------------------------------------------------------------------------------------------------------------------------------------------------------------------------------------------------------------------------------------------------------------------------------------------------------------------------------------------------------------------------------------------------------------------------------------------------------------------------------------------------------------------------------------------------------------------------------------------------------------------------------------------------------------------------------------------------------------------------------------------------------------------------------------------------------------------------|
| Up_AD | (1) (GO) CHROMOSOME, (2) (GO) KERATINIZATION | <p>(1) (H)K INFLAMMATORY RESPONSE, (2) (H)K MYOGENESIS, (3) (H)K TNFA SIGNALING VIA NFKB, (4) (H)K IL2 STAT5 SIGNALING, (5) (K) CYTOKINE CYTOKINE RECEPTOR INTERACTION, (6) (R) IMMUNOREGULATORY INTERACTIONS BETWEEN A LYMPHOID AND A NON LYMPHOID CELL, (7) (R) SIGNALING BY INTERLEUKINS, (8) (PID) ANGIOPOIETIN RECEPTOR PATHWAY, (9) (GO) ADAPTIVE IMMUNE RESPONSE, (10) (GO) ALPHA BETA T CELL ACTIVATION, (11) (GO) ANATOMICAL STRUCTURE FORMATION INVOLVED IN MORPHOGENESIS, (12) (GO) BIOLOGICAL ADHESION, (13) (GO) BLOOD VESSEL MORPHOGENESIS, (14) (GO) CARDIOVASCULAR SYSTEM DEVELOPMENT, (15) (GO) CELL ACTIVATION, (16) (GO) CELL CELL ADHESION, (17) (GO) CELL MOTILITY, (18) (GO) CELL SURFACE, (19) (GO) CIRCULATORY SYSTEM DEVELOPMENT, (20) (GO) CYTOKINE MEDIATED SIGNALING PATHWAY, (21) (GO) CYTOKINE PRODUCTION, (22) (GO) DEFENSE RESPONSE, (23) (GO) EXTERNAL SIDE OF PLASMA MEMBRANE, (24) (GO) IMMUNE RECEPTOR ACTIVITY, (25) (GO) IMMUNE SYSTEM DEVELOPMENT, (26) (GO) INFLAMMATORY RESPONSE, (27) (GO) INTRINSIC COMPONENT OF PLASMA MEMBRANE, (28) (GO) LEUKOCYTE CELL CELL ADHESION, (29) (GO) LEUKOCYTE</p> |



|  |  |                                                                                                                                                                                                                                                                                                                                                                                                                                                                                                                                                                                                                                                                                                                                                                                                                                                                                                                                                                                                                                                                                                                                                                                                                                                                                                                                                                                                                                                                                                                                                                                                                                                                                                                                                                                                                                                                                                                                                                                                                                                                                                                                                                                                                                                                                                                   |
|--|--|-------------------------------------------------------------------------------------------------------------------------------------------------------------------------------------------------------------------------------------------------------------------------------------------------------------------------------------------------------------------------------------------------------------------------------------------------------------------------------------------------------------------------------------------------------------------------------------------------------------------------------------------------------------------------------------------------------------------------------------------------------------------------------------------------------------------------------------------------------------------------------------------------------------------------------------------------------------------------------------------------------------------------------------------------------------------------------------------------------------------------------------------------------------------------------------------------------------------------------------------------------------------------------------------------------------------------------------------------------------------------------------------------------------------------------------------------------------------------------------------------------------------------------------------------------------------------------------------------------------------------------------------------------------------------------------------------------------------------------------------------------------------------------------------------------------------------------------------------------------------------------------------------------------------------------------------------------------------------------------------------------------------------------------------------------------------------------------------------------------------------------------------------------------------------------------------------------------------------------------------------------------------------------------------------------------------|
|  |  | <p> DIFFERENTIATION, (30) (GO)<br/> LEUKOCYTE MIGRATION, (31) (GO)<br/> LOCOMOTION, (32) (GO) LYMPHOCYTE<br/> ACTIVATION, (33) (GO) MOLECULAR<br/> TRANSDUCER ACTIVITY, (34) (GO)<br/> NEGATIVE REGULATION OF<br/> DEVELOPMENTAL PROCESS, (35) (GO)<br/> NEGATIVE REGULATION OF IMMUNE<br/> SYSTEM PROCESS, (36) (GO) NEGATIVE<br/> REGULATION OF MULTICELLULAR<br/> ORGANISMAL PROCESS, (37) (GO)<br/> POSITIVE REGULATION OF CELL<br/> POPULATION PROLIFERATION, (38) (GO)<br/> POSITIVE REGULATION OF<br/> DEVELOPMENTAL PROCESS, (39) (GO)<br/> POSITIVE REGULATION OF IMMUNE<br/> SYSTEM PROCESS, (40) (GO) POSITIVE<br/> REGULATION OF VASCULATURE<br/> DEVELOPMENT, (41) (GO) REGULATION<br/> OF CELL ACTIVATION, (42) (GO)<br/> REGULATION OF CELL ADHESION, (43)<br/> (GO) REGULATION OF CELL<br/> POPULATION PROLIFERATION, (44) (GO)<br/> REGULATION OF IMMUNE SYSTEM<br/> PROCESS, (45) (GO) REGULATION OF<br/> VASCULATURE DEVELOPMENT, (46)<br/> (GO) RESPONSE TO BACTERIUM, (47)<br/> (GO) RESPONSE TO BIOTIC STIMULUS,<br/> (48) (GO) RESPONSE TO LI(PID), (49) (GO)<br/> RESPONSE TO MOLECULE OF<br/> BACTERIAL ORIGIN, (50) (GO)<br/> RESPONSE TO WOUNDING, (51) (GO)<br/> TUBE DEVELOPMENT, (52) (GO) TUBE<br/> MORPHOGENESIS, (53) (GO) T CELL<br/> ACTIVATION, (54) (GO) WOUND<br/> HEALING, (55) (GO) POSITIVE<br/> REGULATION OF MULTICELLULAR<br/> ORGANISMAL PROCESS, (56) (GO)<br/> REGULATION OF LEUKOCYTE<br/> DIFFERENTIATION, (57) (GO) NEGATIVE<br/> REGULATION OF CYTOKINE<br/> PRODUCTION, (58) (GO) POSITIVE<br/> REGULATION OF CELL ACTIVATION,<br/> (59) (GO) RESPONSE TO CYTOKINE, (60)<br/> (GO) REGULATION OF CELL CELL<br/> ADHESION, (61) (GO) CYTOKINE<br/> BINDING, (62) (GO) MUSCLE<br/> STRUCTURE DEVELOPMENT, (63) (GO)<br/> POSITIVE REGULATION OF CELL<br/> ADHESION, (64) (GO) DEFENSE<br/> RESPONSE TO OTHER ORGANISM, (65)<br/> (GO) REGULATION OF IMMUNE<br/> RESPONSE, (66) (GO) HEART<br/> DEVELOPMENT, (67) (GO) REGULATION<br/> OF IMMUNE EFFECTOR PROCESS, (68)<br/> (GO) REGULATION OF CELL<br/> DIFFERENTIATION, (69) (GO) NEGATIVE<br/> REGULATION OF CELL<br/> DIFFERENTIATION, (70) (GO) POSITIVE<br/> REGULATION OF INTRACELLULAR<br/> SIGNAL TRANSDUCTION, (71) (GO)<br/> RECEPTOR COMPLEX, (72) (GO) TUMOR<br/> NECROSIS FACTOR SUPERFAMILY </p> |
|--|--|-------------------------------------------------------------------------------------------------------------------------------------------------------------------------------------------------------------------------------------------------------------------------------------------------------------------------------------------------------------------------------------------------------------------------------------------------------------------------------------------------------------------------------------------------------------------------------------------------------------------------------------------------------------------------------------------------------------------------------------------------------------------------------------------------------------------------------------------------------------------------------------------------------------------------------------------------------------------------------------------------------------------------------------------------------------------------------------------------------------------------------------------------------------------------------------------------------------------------------------------------------------------------------------------------------------------------------------------------------------------------------------------------------------------------------------------------------------------------------------------------------------------------------------------------------------------------------------------------------------------------------------------------------------------------------------------------------------------------------------------------------------------------------------------------------------------------------------------------------------------------------------------------------------------------------------------------------------------------------------------------------------------------------------------------------------------------------------------------------------------------------------------------------------------------------------------------------------------------------------------------------------------------------------------------------------------|

|  |  |                                                                                                                                                                                                                                                                                                                                                                                                                                                                                                                                                                                                                                                                                                                                                                                                                                                                                                                                                                                                                                                                                                                                                                                                                                                                                                                                                                                                                                                                                                                                                                                                                                                                                                                                                                                                                                                                                                                                                                                                                                                                                                                                                                                                                                                                                                                    |
|--|--|--------------------------------------------------------------------------------------------------------------------------------------------------------------------------------------------------------------------------------------------------------------------------------------------------------------------------------------------------------------------------------------------------------------------------------------------------------------------------------------------------------------------------------------------------------------------------------------------------------------------------------------------------------------------------------------------------------------------------------------------------------------------------------------------------------------------------------------------------------------------------------------------------------------------------------------------------------------------------------------------------------------------------------------------------------------------------------------------------------------------------------------------------------------------------------------------------------------------------------------------------------------------------------------------------------------------------------------------------------------------------------------------------------------------------------------------------------------------------------------------------------------------------------------------------------------------------------------------------------------------------------------------------------------------------------------------------------------------------------------------------------------------------------------------------------------------------------------------------------------------------------------------------------------------------------------------------------------------------------------------------------------------------------------------------------------------------------------------------------------------------------------------------------------------------------------------------------------------------------------------------------------------------------------------------------------------|
|  |  | <p> CYTOKINE PRODUCTION, (73) (GO)<br/> NEGATIVE REGULATION OF CELL<br/> ACTIVATION, (74) (GO) SIDE OF<br/> MEMBRANE, (75) (GO) CELLULAR<br/> RESPONSE TO BIOTIC STIMULUS, (76)<br/> (GO) MYELOID CELL DIFFERENTIATION,<br/> (77) (GO) ADAPTIVE IMMUNE RESPONSE<br/> BASED ON SOMATIC RECOMBINATION<br/> OF IMMUNE RECEPTORS BUILT FROM<br/> IMMUNOGLOBULIN SUPERFAMILY<br/> DOMAINS, (78) (GO) REGULATION OF<br/> CELLULAR COMPONENT MOVEMENT,<br/> (79) (GO) ALPHA BETA T CELL<br/> DIFFERENTIATION, (80) (GO)<br/> EPITHELIAL CELL APOPTOTIC PROCESS,<br/> (81) (GO) EPITHELIAL CELL<br/> PROLIFERATION, (82) (GO) POSITIVE<br/> REGULATION OF LOCOMOTION, (83)<br/> (GO) CELL SUBSTRATE ADHESION, (84)<br/> (GO) SIGNALING RECEPTOR BINDING,<br/> (85) (GO) POSITIVE REGULATION OF<br/> PHOSPHATIDYLINOSITOL 3 KINASE<br/> SIGNALING, (86) (GO) HEART<br/> MORPHOGENESIS, (87) (GO) INNATE<br/> IMMUNE RESPONSE, (88) (GO)<br/> RESPONSE TO GROWTH FACTOR, (89)<br/> (GO) CYTOKINE SECRETION, (90) (GO)<br/> CELL CHEMOTAXIS, (91) (GO) POSITIVE<br/> REGULATION OF MAPK CASCADE, (92)<br/> (GO) REGULATION OF<br/> PHA(GO)CYTOSIS, (93) (GO) POSITIVE<br/> REGULATION OF CELL<br/> DIFFERENTIATION, (94) (GO)<br/> REGULATION OF BODY FLUID LEVELS,<br/> (95) (GO) POSITIVE REGULATION OF<br/> IMMUNE RESPONSE, (96) (GO)<br/> ENDOTHELIAL CELL APOPTOTIC<br/> PROCESS, (97) (GO) POSITIVE<br/> REGULATION OF PHOSPHORUS<br/> METABOLIC PROCESS, (98) (GO)<br/> POSITIVE REGULATION OF SIGNALING,<br/> (99) (GO) REGULATION OF<br/> INFLAMMATORY RESPONSE, (100) (GO)<br/> IMMUNE EFFECTOR PROCESS, (101) (GO)<br/> LYMPHOCYTE MEDIATED IMMUNITY,<br/> (102) (GO) ERK1 AND ERK2 CASCADE,<br/> (103) (GO) REGULATION OF LEUKOCYTE<br/> MEDIATED IMMUNITY, (104) (GO)<br/> CELLULAR RESPONSE TO LI(PID), (105)<br/> (GO) COAGULATION, (106) (GO)<br/> REGULATION OF RESPONSE TO<br/> EXTERNAL STIMULUS, (107) (GO)<br/> GRANULOCYTE MIGRATION, (108) (GO)<br/> POSITIVE REGULATION OF<br/> HEMOPOIESIS, (109) (GO) POSITIVE<br/> REGULATION OF LEUKOCYTE<br/> DIFFERENTIATION, (110) (GO)<br/> NEGATIVE REGULATION OF CELL CELL<br/> ADHESION, (111) (GO) POSITIVE<br/> REGULATION OF EPITHELIAL CELL<br/> PROLIFERATION, (112) (GO)<br/> REGULATION OF EPITHELIAL CELL<br/> APOPTOTIC PROCESS, (113) (GO) </p> |
|--|--|--------------------------------------------------------------------------------------------------------------------------------------------------------------------------------------------------------------------------------------------------------------------------------------------------------------------------------------------------------------------------------------------------------------------------------------------------------------------------------------------------------------------------------------------------------------------------------------------------------------------------------------------------------------------------------------------------------------------------------------------------------------------------------------------------------------------------------------------------------------------------------------------------------------------------------------------------------------------------------------------------------------------------------------------------------------------------------------------------------------------------------------------------------------------------------------------------------------------------------------------------------------------------------------------------------------------------------------------------------------------------------------------------------------------------------------------------------------------------------------------------------------------------------------------------------------------------------------------------------------------------------------------------------------------------------------------------------------------------------------------------------------------------------------------------------------------------------------------------------------------------------------------------------------------------------------------------------------------------------------------------------------------------------------------------------------------------------------------------------------------------------------------------------------------------------------------------------------------------------------------------------------------------------------------------------------------|



|         |                                                                                                                                                                                                                                                                                                                                                                                                                                                                                                                                                                                                                                                                                                                                                                                                                                                                                                                                                                                                                                                                                                                                                                                                                                                                                                                                                                                                    |                                                                                                                                                                                                                                                                                                                                                                                                                                                                                                                                                                                                                                                                                                                                                                                                                                                                                                                                                                                                                                                                                                                    |
|---------|----------------------------------------------------------------------------------------------------------------------------------------------------------------------------------------------------------------------------------------------------------------------------------------------------------------------------------------------------------------------------------------------------------------------------------------------------------------------------------------------------------------------------------------------------------------------------------------------------------------------------------------------------------------------------------------------------------------------------------------------------------------------------------------------------------------------------------------------------------------------------------------------------------------------------------------------------------------------------------------------------------------------------------------------------------------------------------------------------------------------------------------------------------------------------------------------------------------------------------------------------------------------------------------------------------------------------------------------------------------------------------------------------|--------------------------------------------------------------------------------------------------------------------------------------------------------------------------------------------------------------------------------------------------------------------------------------------------------------------------------------------------------------------------------------------------------------------------------------------------------------------------------------------------------------------------------------------------------------------------------------------------------------------------------------------------------------------------------------------------------------------------------------------------------------------------------------------------------------------------------------------------------------------------------------------------------------------------------------------------------------------------------------------------------------------------------------------------------------------------------------------------------------------|
|         |                                                                                                                                                                                                                                                                                                                                                                                                                                                                                                                                                                                                                                                                                                                                                                                                                                                                                                                                                                                                                                                                                                                                                                                                                                                                                                                                                                                                    | <p>           ENDOTHELIUM DEVELOPMENT, (114) (GO) ANCHORING JUNCTION, (115) (GO) NEGATIVE REGULATION OF CELL POPULATION PROLIFERATION, (116) (GO) TAXIS, (117) (GO) REGULATION OF ALPHA BETA T CELL ACTIVATION, (118) (GO) POSITIVE REGULATION OF PHA(GO)CYTOSIS, (119) (GO) NEGATIVE REGULATION OF CELL ADHESION, (120) (GO) POSITIVE REGULATION OF PROTEIN MODIFICATION PROCESS, (121) (GO) PEPTIDYL TYROSINE MODIFICATION, (122) (GO) PHA(GO)CYTOSIS, (123) (GO) REGULATION OF FAT CELL DIFFERENTIATION, (124) (GO) CARDIAC CHAMBER MORPHOGENESIS, (125) (GO) REGULATION OF CELLULAR RESPONSE TO GROWTH FACTOR STIMULUS, (126) (GO) CELLULAR RESPONSE TO VASCULAR ENDOTHELIAL GROWTH FACTOR STIMULUS, (127) (GO) REGULATION OF ANATOMICAL STRUCTURE MORPHOGENESIS, (128) (GO) MYELOID LEUKOCYTE MIGRATION, (129) (GO) POSITIVE REGULATION OF ERK1 AND ERK2 CASCADE, (130) (GO) CD4 POSITIVE ALPHA BETA T CELL ACTIVATION, (131) (GO) REGULATION OF ADAPTIVE IMMUNE RESPONSE, (132) (GO) ACTIVATION OF IMMUNE RESPONSE, (133) (GO) MUSCLE SYSTEM PROCESS, (134) (GO) REGULATION OF DEFENSE RESPONSE         </p> |
| Down_AD | <p>           (1) (H)K MYC TARGETS V1, (2) (H)K MTORC1 SIGNALING, (3) (H)K DNA REPAIR, (4) (R) APC C CDH1 MEDIATED DEGRADATION OF CDC20 AND OTHER APC C CDH1 TARGETED PROTEINS IN LATE MITOSIS EARLY G1, (5) (R) ASSEMBLY OF THE PRE REPLICATIVE COMPLEX, (6) (R) CELL CYCLE CHECKPOINTS, (7) (R) DNA REPLICATION, (8) (R) HIV INFECTION, (9) (R) METABOLISM OF RNA, (10) (R) MITOCHONDRIAL PROTEIN IMPORT, (11) (R) MITOCHONDRIAL TRANSLATION, (12) (R) MITOTIC G2 G2 M PHASES, (13) (R) MITOTIC METAPHASE AND ANAPHASE, (14) (R) ORC1 REMOVAL FROM CHROMATIN, (15) (R) SEPARATION OF SISTER CHROMATIDS, (16) (R) SWITCHING OF ORIGINS TO A POST REPLICATIVE STATE, (17) (R) THE CITRIC ACID TCA CYCLE AND RESPIRATORY ELECTRON TRANSPORT, (18) (R) TRANSLATION, (19) (R) METABOLISM OF POLYAMINES, (20) (R) THE ROLE OF GTSE1 IN G2 M PROGRESSION AFTER G2 CHECKPOINT, (21) (R) APC C MEDIATED DEGRADATION OF CELL CYCLE PROTEINS, (22) (R) DNA REPLICATION PRE INITIATION, (23) (R) STABILIZATION OF P53, (24) (R) SCF SKP2 MEDIATED DEGRADATION OF P27 P21, (25) (R) S PHASE, (26) (R) G2 M CHECKPOINTS, (27) (R) NUCLEOTIDE EXCISION REPAIR, (28) (R) PROCESSING OF CAPPED INTRON CONTAINING PRE MRNA, (29) (R) G1 S DNA DAMAGE CHECKPOINTS, (30) (R) CELL CYCLE, (31) (R) M PHASE, (32) (R) TRNA AMINOACYLATION, (33) (R) CELL CYCLE MITOTIC, (34) (R) (GO)LGI TO ER RETROGRADE         </p> |                                                                                                                                                                                                                                                                                                                                                                                                                                                                                                                                                                                                                                                                                                                                                                                                                                                                                                                                                                                                                                                                                                                    |

|  |                                                                                                                                                                                                                                                                                                                                                                                                                                                                                                                                                                                                                                                                                                                                                                                                                                                                                                                                                                                                                                                                                                                                                                                                                                                                                                                                                                                                                                                                                                                                                                                                                                                                                                                                                                                                                                                                                                                                                                                                                                                                                                                            |  |
|--|----------------------------------------------------------------------------------------------------------------------------------------------------------------------------------------------------------------------------------------------------------------------------------------------------------------------------------------------------------------------------------------------------------------------------------------------------------------------------------------------------------------------------------------------------------------------------------------------------------------------------------------------------------------------------------------------------------------------------------------------------------------------------------------------------------------------------------------------------------------------------------------------------------------------------------------------------------------------------------------------------------------------------------------------------------------------------------------------------------------------------------------------------------------------------------------------------------------------------------------------------------------------------------------------------------------------------------------------------------------------------------------------------------------------------------------------------------------------------------------------------------------------------------------------------------------------------------------------------------------------------------------------------------------------------------------------------------------------------------------------------------------------------------------------------------------------------------------------------------------------------------------------------------------------------------------------------------------------------------------------------------------------------------------------------------------------------------------------------------------------------|--|
|  | <p>TRANSPORT, (35) (K) AMINOACYL TRNA BIOSYNTHESIS, (36) (R) MITOTIC G1 PHASE AND G1 S TRANSITION, (37) (R) METABOLISM OF AMINO ACIDS AND DERIVATIVES, (38) (R) TRNA PROCESSING, (39) (R) RRNA PROCESSING, (40) (GO) AMIDE BIOSYNTHETIC PROCESS, (41) (GO) ANAPHASE PROMOTING COMPLEX DEPENDENT CATABOLIC PROCESS, (42) (GO) CATALYTIC ACTIVITY ACTING ON RNA, (43) (GO) CELLULAR AMIDE METABOLIC PROCESS, (44) (GO) ENDOPEPTIDASE COMPLEX, (45) (GO) ENVELOPE, (46) (GO) MITOCHONDRIAL ENVELOPE, (47) (GO) MITOCHONDRIAL GENE EXPRESSION, (48) (GO) MITOCHONDRIAL MATRIX, (49) (GO) MITOCHONDRIAL PROTEIN COMPLEX, (50) (GO) MITOCHONDRIAL TRANSLATION, (51) (GO) MITOCHONDRIAL TRANSLATIONAL TERMINATION, (52) (GO) MITOCHONDRION, (53) (GO) NCRNA METABOLIC PROCESS, (54) (GO) NCRNA PROCESSING, (55) (GO) ORGANELLAR RIBOSOME, (56) (GO) ORGANELLE INNER MEMBRANE, (57) (GO) ORGANONITROGEN COMPOUND BIOSYNTHETIC PROCESS, (58) (GO) PEPTIDE BIOSYNTHETIC PROCESS, (59) (GO) PEPTIDE METABOLIC PROCESS, (60) (GO) RIBONUCLEOPROTEIN COMPLEX, (61) (GO) RIBONUCLEOPROTEIN COMPLEX BIOGENESIS, (62) (GO) RIBOSOME, (63) (GO) RIBOSOME BIOGENESIS, (64) (GO) RNA BINDING, (65) (GO) RNA PROCESSING, (66) (GO) TRANSLATIONAL ELONGATION, (67) (GO) TRANSLATIONAL TERMINATION, (68) (GO) TRNA METABOLIC PROCESS, (69) (GO) CELLULAR AMINO ACID METABOLIC PROCESS, (70) (GO) RIBOSOMAL SUBUNIT, (71) (GO) REGULATION OF CELL CYCLE G2 M PHASE TRANSITION, (72) (GO) CATALYTIC ACTIVITY ACTING ON A TRNA, (73) (GO) CELL CYCLE G2 M PHASE TRANSITION, (74) (GO) NUCLEOLUS, (75) (GO) NEGATIVE REGULATION OF CELL CYCLE G2 M PHASE TRANSITION, (76) (GO) RRNA METABOLIC PROCESS, (77) (GO) STRUCTURAL CONSTITUENT OF RIBOSOME, (78) (GO) MITOCHONDRIAL LARGE RIBOSOMAL SUBUNIT, (79) (GO) AMINO ACID ACTIVATION, (80) (GO) LIGASE ACTIVITY, (81) (GO) LARGE RIBOSOMAL SUBUNIT, (82) (GO) LIGASE ACTIVITY FORMING CARBON OXYGEN BONDS, (83) (GO) TRNA PROCESSING, (84) (GO) ORGANELLE ENVELOPE LUMEN, (85) (GO) RIBONUCLEOPROTEIN COMPLEX BINDING, (86) (GO) DRUG BINDING, (87) (GO) ATPASE ACTIVITY, (88) (GO) PRERIBOSOME</p> |  |
|--|----------------------------------------------------------------------------------------------------------------------------------------------------------------------------------------------------------------------------------------------------------------------------------------------------------------------------------------------------------------------------------------------------------------------------------------------------------------------------------------------------------------------------------------------------------------------------------------------------------------------------------------------------------------------------------------------------------------------------------------------------------------------------------------------------------------------------------------------------------------------------------------------------------------------------------------------------------------------------------------------------------------------------------------------------------------------------------------------------------------------------------------------------------------------------------------------------------------------------------------------------------------------------------------------------------------------------------------------------------------------------------------------------------------------------------------------------------------------------------------------------------------------------------------------------------------------------------------------------------------------------------------------------------------------------------------------------------------------------------------------------------------------------------------------------------------------------------------------------------------------------------------------------------------------------------------------------------------------------------------------------------------------------------------------------------------------------------------------------------------------------|--|

**Table S11.** Jointly deregulated pathways in AD and LIVCA.

|       | Up_LIVCA                                                                     | Down_LIVCA                                                                                                                                                                                                                                                                                                                                                                                              |
|-------|------------------------------------------------------------------------------|---------------------------------------------------------------------------------------------------------------------------------------------------------------------------------------------------------------------------------------------------------------------------------------------------------------------------------------------------------------------------------------------------------|
| Up_AD | (1) (GO) CHROMOSOME, (2) (GO) NUCLEAR CHROMOSOME, (3) (GO) CHROMATIN BINDING | (1) (H)K INFLAMMATORY RESPONSE, (2) (H)K ALLOGRAFT REJECTION, (3) (H)K COAGULATION, (4) (H)K KRAS SIGNALING DN, (5) (K) CYTOKINE CYTOKINE RECEPTOR INTERACTION, (6) NABA CORE MATRISOME, (7) NABA MATRISOME, (8) NABA MATRISOME ASSOCIATED, (9) NABA SECRETED FACTORS, (10) (R) IMMUNOREGULATORY INTERACTIONS BETWEEN A LYMPHOID AND A NON LYMPHOID CELL, (11) (K) HEMATOPOIETIC CELL LINEAGE, (12) (R) |

CLASS A 1 RHODOPSIN LIKE  
 RECEPTORS, (13) NABA ECM  
 GLYCOPROTEINS, (14) (K) COMPLEMENT  
 AND COAGULATION CASCADES, (15) (R)  
 COMPLEMENT CASCADE, (16) (K) CELL  
 ADHESION MOLECULES CAMS, (17) (R)  
 GPCR LIGAND BINDING, (18) (R)  
 CHEMOKINE RECEPTORS BIND  
 CHEMOKINES, (19) (GO) ADAPTIVE  
 IMMUNE RESPONSE, (20) (GO)  
 BIOLOGICAL ADHESION, (21) (GO) CELL  
 CELL ADHESION, (22) (GO) CELL  
 MOTILITY, (23) (GO) CELL SURFACE, (24)  
 (GO) COLLAGEN CONTAINING  
 EXTRACELLULAR MATRIX, (25) (GO)  
 DEFENSE RESPONSE, (26) (GO)  
 EXTERNAL SIDE OF PLASMA  
 MEMBRANE, (27) (GO) EXTRACELLULAR  
 MATRIX, (28) (GO) EXTRACELLULAR  
 MATRIX STRUCTURAL CONSTITUENT,  
 (29) (GO) IMMUNE RECEPTOR ACTIVITY,  
 (30) (GO) INFLAMMATORY RESPONSE,  
 (31) (GO) INTRINSIC COMPONENT OF  
 PLASMA MEMBRANE, (32) (GO)  
 LEUKOCYTE CELL CELL ADHESION, (33)  
 (GO) LEUKOCYTE MIGRATION, (34) (GO)  
 LEUKOCYTE PROLIFERATION, (35) (GO)  
 LOCOMOTION, (36) (GO) MOLECULAR  
 TRANSDUCER ACTIVITY, (37) (GO)  
 NEGATIVE REGULATION OF  
 MULTICELLULAR ORGANISMAL  
 PROCESS, (38) (GO) POSITIVE  
 REGULATION OF IMMUNE SYSTEM  
 PROCESS, (39) (GO) REGULATION OF  
 CELL ACTIVATION, (40) (GO)  
 REGULATION OF IMMUNE SYSTEM  
 PROCESS, (41) (GO) REGULATION OF  
 VASCULATURE DEVELOPMENT, (42)  
 (GO) RESPONSE TO BACTERIUM, (43)  
 (GO) RESPONSE TO BIOTIC STIMULUS,  
 (44) (GO) RESPONSE TO LI(PID), (45) (GO)  
 RESPONSE TO MOLECULE OF  
 BACTERIAL ORIGIN, (46) (GO)  
 RESPONSE TO WOUNDING, (47) (GO)  
 POSITIVE REGULATION OF  
 MULTICELLULAR ORGANISMAL  
 PROCESS, (48) (GO) CYTOKINE  
 RECEPTOR ACTIVITY, (49) (GO)  
 REGULATION OF CELL CELL ADHESION,  
 (50) (GO) HUMORAL IMMUNE  
 RESPONSE, (51) (GO) REGULATION OF  
 IMMUNE RESPONSE, (52) (GO)  
 REGULATION OF IMMUNE EFFECTOR  
 PROCESS, (53) (GO) RECEPTOR  
 COMPLEX, (54) (GO) SIDE OF  
 MEMBRANE, (55) (GO) G PROTEIN  
 COUPLED RECEPTOR ACTIVITY, (56)  
 (GO) ADAPTIVE IMMUNE RESPONSE  
 BASED ON SOMATIC RECOMBINATION  
 OF IMMUNE RECEPTORS BUILT FROM  
 IMMUNOGLOBULIN SUPERFAMILY  
 DOMAINS, (57) (GO) POSITIVE  
 REGULATION OF CELL CELL ADHESION,

|         |                                                                                                                                                                                                                                                                                                                                                                                                                                                                                                                                                                                                                                                                                                                                                                                                                                                                                                                                                                                                                                                                                                                                                                                                                                                                                                                                                                                                                                                                                                                                                                                                                                                                                                                                                                                                                                                                                                                                                                                                                                              |                                                                                                                                                                                                                                                                                                                                                                                                                                                                                                                                                                                                                                                                                                                                                          |
|---------|----------------------------------------------------------------------------------------------------------------------------------------------------------------------------------------------------------------------------------------------------------------------------------------------------------------------------------------------------------------------------------------------------------------------------------------------------------------------------------------------------------------------------------------------------------------------------------------------------------------------------------------------------------------------------------------------------------------------------------------------------------------------------------------------------------------------------------------------------------------------------------------------------------------------------------------------------------------------------------------------------------------------------------------------------------------------------------------------------------------------------------------------------------------------------------------------------------------------------------------------------------------------------------------------------------------------------------------------------------------------------------------------------------------------------------------------------------------------------------------------------------------------------------------------------------------------------------------------------------------------------------------------------------------------------------------------------------------------------------------------------------------------------------------------------------------------------------------------------------------------------------------------------------------------------------------------------------------------------------------------------------------------------------------------|----------------------------------------------------------------------------------------------------------------------------------------------------------------------------------------------------------------------------------------------------------------------------------------------------------------------------------------------------------------------------------------------------------------------------------------------------------------------------------------------------------------------------------------------------------------------------------------------------------------------------------------------------------------------------------------------------------------------------------------------------------|
|         |                                                                                                                                                                                                                                                                                                                                                                                                                                                                                                                                                                                                                                                                                                                                                                                                                                                                                                                                                                                                                                                                                                                                                                                                                                                                                                                                                                                                                                                                                                                                                                                                                                                                                                                                                                                                                                                                                                                                                                                                                                              | <p>(58) (GO) REGULATION OF BODY FLUID LEVELS, (59) (GO) IMMUNE EFFECTOR PROCESS, (60) (GO) LYMPHOCYTE MEDIATED IMMUNITY, (61) (GO) POSITIVE REGULATION OF T CELL PROLIFERATION, (62) (GO) REGULATION OF LEUKOCYTE MEDIATED IMMUNITY, (63) (GO) TAXIS, (64) (GO) PEPTIDE RECEPTOR ACTIVITY, (65) (GO) COMPLEMENT ACTIVATION, (66) (GO) REGULATION OF HUMORAL IMMUNE RESPONSE, (67) (GO) BLOOD MICROPARTICLE, (68) (GO) CELL KILLING, (69) (GO) SENSORY PERCEPTION OF CHEMICAL STIMULUS, (70) (GO) REGULATION OF CELL KILLING, (71) (GO) B CELL RECEPTOR SIGNALING PATHWAY, (72) (GO) B CELL MEDIATED IMMUNITY, (73) (GO) STEROL TRANSPORT, (74) (GO) COMPLEMENT ACTIVATION ALTERNATIVE PATHWAY</p>                                                        |
| Down_AD | <p>(1) (H)K MYC TARGETS V1, (2) (H)K MTORC1 SIGNALING, (3) (H)K PROTEIN SECRETION, (4) (H)K DNA REPAIR, (5) (H)K UNFOLDED PROTEIN RESPONSE, (6) (K) PROTEASOME, (7) (R) ANTIGEN PROCESSING UBIQUITINATION PROTEASOME DEGRADATION, (8) (R) APC C CDH1 MEDIATED DEGRADATION OF CDC20 AND OTHER APC C CDH1 TARGETED PROTEINS IN LATE MITOSIS EARLY G1, (9) (R) ASSEMBLY OF THE PRE REPLICATIVE COMPLEX, (10) (R) AUF1 HNRNP D0 BINDS AND DESTABILIZES MRNA, (11) (R) CELL CYCLE CHECKPOINTS, (12) (R) CLASS I MHC MEDIATED ANTIGEN PROCESSING PRESENTATION, (13) (R) DEFECTIVE CFTR CAUSES CYSTIC FIBROSIS, (14) (R) DEGRADATION OF DVL, (15) (R) DEGRADATION OF GLI1 BY THE PROTEASOME, (16) (R) DNA REPLICATION, (17) (R) HEDGEHOG LIGAND BIOGENESIS, (18) (R) HIV INFECTION, (19) (R) HOST INTERACTIONS OF HIV FACTORS, (20) (R) MEMBRANE TRAFFICKING, (21) (R) METABOLISM OF RNA, (22) (R) MITOCHONDRIAL TRANSLATION, (23) (R) MITOTIC G2 G2 M PHASES, (24) (R) MITOTIC METAPHASE AND ANAPHASE, (25) (R) NEDDYLATION, (26) (R) NEGATIVE REGULATION OF NOTCH4 SIGNALING, (27) (R) ORC1 REMOVAL FROM CHROMATIN, (28) (R) REGULATION OF PTEN STABILITY AND ACTIVITY, (29) (R) REGULATION OF RAS BY GAPS, (30) (R) REGULATION OF RUNX2 EXPRESSION AND ACTIVITY, (31) (R) SEPARATION OF SISTER CHROMATIDS, (32) (R) SWITCHING OF ORIGINS TO A POST REPLICATIVE STATE, (33) (R) TRANSLATION, (34) (R) DEGRADATION OF AXIN, (35) (R) METABOLISM OF POLYAMINES, (36) (R) POST TRANSLATIONAL PROTEIN MODIFICATION, (37) (R) THE ROLE OF GTSE1 IN G2 M PROGRESSION AFTER G2 CHECKPOINT, (38) (R) APC C MEDIATED DEGRADATION OF CELL CYCLE PROTEINS, (39) (R) CELLULAR RESPONSE TO HYPOXIA, (40) (R) DNA REPLICATION PRE INITIATION, (41) (R) STABILIZATION OF P53, (42) (R) ORGANELLE BIOGENESIS AND MAINTENANCE, (43) (R) SCF SKP2 MEDIATED DEGRADATION OF P27 P21, (44) (R) REGULATION OF RUNX3 EXPRESSION AND ACTIVITY, (45) (R) S PHASE, (46) (R) REGULATION OF EXPRESSION OF SLITS AND ROBOS, (47) (R) G2 M CHECKPOINTS, (48) (R) ASYMMETRIC</p> | <p>(1) (H)K FATTY ACID METABOLISM, (2) (R) NEURONAL SYSTEM, (3) (R) METABOLISM OF AMINO ACIDS AND DERIVATIVES, (4) (GO) MITOCHONDRIAL MATRIX, (5) (GO) SYNAPTIC SIGNALING, (6) (GO) CELLULAR AMINO ACID METABOLIC PROCESS, (7) (GO) POSTSYNAPTIC MEMBRANE, (8) (GO) OXIDATION REDUCTION PROCESS, (9) (GO) SMALL MOLECULE METABOLIC PROCESS, (10) (GO) COFACTOR BIOSYNTHETIC PROCESS, (11) (GO) MONOVALENT INORGANIC CATION TRANSMEMBRANE TRANSPORTER ACTIVITY, (12) (GO) CATION TRANSMEMBRANE TRANSPORT, (13) (GO) COENZYME BIOSYNTHETIC PROCESS, (14) (GO) OXIDOREDUCTASE ACTIVITY, (15) (GO) TRANSMEMBRANE TRANSPORT, (16) (GO) INORGANIC ION TRANSMEMBRANE TRANSPORT, (17) (GO) COENZYME METABOLIC PROCESS, (18) (GO) ION TRANSMEMBRANE TRANSPORT</p> |

LOCALIZATION OF PCP PROTEINS, (49) (R) DECTIN 1  
 MEDIATED NONCANONICAL NF KB SIGNALING, (50) (R)  
 SIGNALING BY ROBO RECEPTORS, (51) (R) REGULATION  
 OF MRNA STABILITY BY PROTEINS THAT BIND AU RICH  
 ELEMENTS, (52) (R) HEDGEHOG OFF STATE, (53) (R)  
 NUCLEOTIDE EXCISION REPAIR, (54) (R) FCER1 MEDIATED  
 NF KB ACTIVATION, (55) (R) CYCLIN A CDK2 ASSOCIATED  
 EVENTS AT S PHASE ENTRY, (56) (R) DOWNSTREAM  
 SIGNALING EVENTS OF B CELL RECEPTOR BCR, (57) (R)  
 PROCESSING OF CAPPED INTRON CONTAINING PRE  
 MRNA, (58) (R) G1 S DNA DAMAGE CHECKPOINTS, (59) (R)  
 FORMATION OF TC NER PRE INCISION COMPLEX, (60) (R)  
 CELL CYCLE, (61) (R) PCP CE PATHWAY, (62) (R) M PHASE,  
 (63) (R) TRANSCRIPTION COUPLED NUCLEOTIDE  
 EXCISION REPAIR TC NER, (64) (R) TRNA  
 AMINOACYLATION, (65) (R) UCH PROTEINASES, (66) (R)  
 HIV LIFE CYCLE, (67) (R) MAPK6 MAPK4 SIGNALING, (68) (R)  
 HEDGEHOG ON STATE, (69) (R) SIGNALING BY NOTCH4,  
 (70) (R) CELL CYCLE MITOTIC, (71) (R) (GO)LGI TO ER  
 RETROGRADE TRANSPORT, (72) (R) PTEN REGULATION,  
 (73) (R) CELLULAR RESPONSES TO EXTERNAL STIMULI, (74)  
 (K) AMINOACYL TRNA BIOSYNTHESIS, (75) (R) MRNA  
 SPLICING, (76) (R) GLOBAL GENOME NUCLEOTIDE  
 EXCISION REPAIR GG NER, (77) (R) MITOTIC G1 PHASE  
 AND G1 S TRANSITION, (78) (R) DEGRADATION OF BETA  
 CATENIN BY THE DESTRUCTION COMPLEX, (79) (R) UB  
 SPECIFIC PROCESSING PROTEASES, (80) (R) FC EPSILON  
 RECEPTOR FCER1 SIGNALING, (81) (R) INFECTIOUS  
 DISEASE, (82) (K) RNA DEGRADATION, (83) (K) UBIQUITIN  
 MEDIATED PROTEOLYSIS, (84) (R) DEUBIQUITINATION,  
 (85) (R) INTRA (GO)LGI AND RETROGRADE (GO)LGI TO ER  
 TRAFFIC, (86) (R) TRNA PROCESSING, (87) (R) MRNA  
 SPLICING MINOR PATHWAY, (88) (R) RRNA PROCESSING,  
 (89) (R) CILUM ASSEMBLY, (90) (R) VIRAL MESSENGER RNA  
 SYNTHESIS, (91) (R) DUAL INCISION IN TC NER, (92) (GO)  
 AMIDE BIOSYNTHETIC PROCESS, (93) (GO) ANAPHASE  
 PROMOTING COMPLEX DEPENDENT CATABOLIC  
 PROCESS, (94) (GO) CATALYTIC ACTIVITY ACTING ON  
 RNA, (95) (GO) CATALYTIC COMPLEX, (96) (GO) CELLULAR  
 AMIDE METABOLIC PROCESS, (97) (GO) CELLULAR  
 MACROMOLECULE CATABOLIC PROCESS, (98) (GO)  
 CELLULAR MACROMOLECULE LOCALIZATION, (99) (GO)  
 CELLULAR PROTEIN CATABOLIC PROCESS, (100) (GO)  
 CELLULAR PROTEIN CONTAINING COMPLEX ASSEMBLY,  
 (101) (GO) ENDOPEPTIDASE COMPLEX, (102) (GO)  
 ENVELOPE, (103) (GO) HYDROLASE ACTIVITY ACTING ON  
 ACID ANHYDRIDES, (104) (GO) INTRACELLULAR PROTEIN  
 TRANSPORT, (105) (GO) INTRACELLULAR TRANSPORT,  
 (106) (GO) MACROAUTOPHAGY, (107) (GO)  
 MITOCHONDRIAL GENE EXPRESSION, (108) (GO)  
 MITOCHONDRIAL TRANSLATION, (109) (GO)  
 MODIFICATION DEPENDENT MACROMOLECULE  
 CATABOLIC PROCESS, (110) (GO) NCRNA METABOLIC  
 PROCESS, (111) (GO) NCRNA PROCESSING, (112) (GO)  
 PEPTIDASE COMPLEX, (113) (GO) PEPTIDE BIOSYNTHETIC  
 PROCESS, (114) (GO) PEPTIDE METABOLIC PROCESS, (115)  
 (GO) PROTEASOMAL PROTEIN CATABOLIC PROCESS, (116)  
 (GO) PROTEIN CONTAINING COMPLEX ASSEMBLY, (117)  
 (GO) PROTEIN MODIFICATION BY SMALL PROTEIN  
 CONJUGATION, (118) (GO) PROTEIN MODIFICATION BY  
 SMALL PROTEIN CONJUGATION OR REMOVAL, (119) (GO)  
 RIBONUCLEOPROTEIN COMPLEX, (120) (GO)  
 RIBONUCLEOPROTEIN COMPLEX BIOGENESIS, (121) (GO)

RIBOSOME, (122) (GO) RIBOSOME BIOGENESIS, (123) (GO)  
 RNA BINDING, (124) (GO) RNA PROCESSING, (125) (GO) SCF  
 DEPENDENT PROTEASOMAL UBIQUITIN DEPENDENT  
 PROTEIN CATABOLIC PROCESS, (126) (GO)  
 TRANSLATIONAL ELONGATION, (127) (GO)  
 TRANSLATIONAL TERMINATION, (128) (GO) TRNA  
 METABOLIC PROCESS, (129) (GO) CELLULAR PROTEIN  
 COMPLEX DISASSEMBLY, (130) (GO) REGULATION OF  
 CELLULAR AMINO ACID METABOLIC PROCESS, (131) (GO)  
 RIBOSOMAL SUBUNIT, (132) (GO) RIBONUCLEOTIDE  
 BINDING, (133) (GO) REGULATION OF CELL CYCLE G2 M  
 PHASE TRANSITION, (134) (GO) CATALYTIC ACTIVITY  
 ACTING ON A TRNA, (135) (GO) CELL CYCLE G2 M PHASE  
 TRANSITION, (136) (GO) PROTEIN POLYUBQUITINATION,  
 (137) (GO) PROTEIN CATABOLIC PROCESS, (138) (GO)  
 NUCLEOLUS, (139) (GO) NEGATIVE REGULATION OF CELL  
 CYCLE G2 M PHASE TRANSITION, (140) (GO) PROTEIN  
 LOCALIZATION TO ORGANELLE, (141) (GO) PROTEIN  
 MODIFICATION BY SMALL PROTEIN REMOVAL, (142) (GO)  
 POSTTRANSCRIPTIONAL REGULATION OF GENE  
 EXPRESSION, (143) (GO) RRNA METABOLIC PROCESS, (144)  
 (GO) UBIQUITIN LIKE PROTEIN TRANSFERASE ACTIVITY,  
 (145) (GO) STRUCTURAL CONSTITUENT OF RIBOSOME,  
 (146) (GO) PROTEIN CONTAINING COMPLEX  
 DISASSEMBLY, (147) (GO) TRANSFERASE COMPLEX, (148)  
 (GO) AMINO ACID ACTIVATION, (149) (GO) MRNA  
 METABOLIC PROCESS, (150) (GO) ESTABLISHMENT OF  
 PROTEIN LOCALIZATION TO ORGANELLE, (151) (GO)  
 RIBONUCLEOPROTEIN COMPLEX SUBUNIT  
 ORGANIZATION, (152) (GO) ORGANELLE LOCALIZATION,  
 (153) (GO) TRANSCRIPTION COUPLED NUCLEOTIDE  
 EXCISION REPAIR, (154) (GO) LARGE RIBOSOMAL  
 SUBUNIT, (155) (GO) REGULATION OF TRANSCRIPTION  
 FROM RNA POLYMERASE II PROMOTER IN RESPONSE TO  
 HYPOXIA, (156) (GO) MICROTUBULE, (157) (GO)  
 MICROTUBULE CYTOSKELETON, (158) (GO) ADENYL  
 NUCLEOTIDE BINDING, (159) (GO) ANTIGEN PROCESSING  
 AND PRESENTATION OF PEPTIDE ANTIGEN, (160) (GO)  
 MACROMOLECULE CATABOLIC PROCESS, (161) (GO)  
 MICROTUBULE BASED PROCESS, (162) (GO) TRNA  
 PROCESSING, (163) (GO) PROTEASOME ACCESSORY  
 COMPLEX, (164) (GO) RNA SPLICING VIA  
 TRANSESTERIFICATION REACTIONS, (165) (GO)  
 UBIQUITIN LIGASE COMPLEX, (166) (GO) REGULATION OF  
 MRNA CATABOLIC PROCESS, (167) (GO)  
 RIBONUCLEOPROTEIN COMPLEX BINDING, (168) (GO)  
 NUCLEOTIDE EXCISION REPAIR, (169) (GO) ENDOSOMAL  
 TRANSPORT, (170) (GO) PROTEIN CONTAINING COMPLEX  
 LOCALIZATION, (171) (GO) TRANSLATION FACTOR  
 ACTIVITY RNA BINDING, (172) (GO) RNA CATABOLIC  
 PROCESS, (173) (GO) CELLULAR COMPONENT  
 DISASSEMBLY, (174) (GO) ESTABLISHMENT OF PROTEIN  
 LOCALIZATION TO MEMBRANE, (175) (GO) NUCLEAR  
 ENVELOPE, (176) (GO) REGULATION OF CATABOLIC  
 PROCESS, (177) (GO) ATPASE ACTIVITY, (178) (GO)  
 CYTOPLASMIC TRANSLATION, (179) (GO)  
 ESTABLISHMENT OF ORGANELLE LOCALIZATION, (180)  
 (GO) UBIQUITIN LIKE PROTEIN LIGASE BINDING, (181)  
 (GO) MRNA PROCESSING, (182) (GO) SPLICEOSOMAL TRI  
 SNRNP COMPLEX, (183) (GO) RNA LOCALIZATION, (184)  
 (GO) INTERLEUKIN 1 MEDIATED SIGNALING PATHWAY,  
 (185) (GO) REGULATION OF CELLULAR CATABOLIC  
 PROCESS, (186) (GO) RNA SPLICING, (187) (GO)



TRANSLATION REGULATOR ACTIVITY NUCLEIC ACID BINDING, (188) (GO) PRERIBOSOME, (189) (GO) SMALL RIBOSOMAL SUBUNIT

**Table S12.** Jointly deregulated pathways in AD and PACA.

|       | Up_PACA                                                                                                                                                                                                                                                                                                                                                                                                                                                                                                                                                                                                                                                                                                                                                                                                                                                                                                                                                                                                                                                                                                                                                                                                                                                                                                                                                                                                                                                                                                                                                                                                                                                                                                                                                                                                                                                                                                                                                                                                                                                                                                                                                                                                                                                                                                                                                                                                                                                                                                                                                                                                                                                                   | Down_PACA                                                                                                                                                                                                                                                                                                                                                                                                                                                                    |
|-------|---------------------------------------------------------------------------------------------------------------------------------------------------------------------------------------------------------------------------------------------------------------------------------------------------------------------------------------------------------------------------------------------------------------------------------------------------------------------------------------------------------------------------------------------------------------------------------------------------------------------------------------------------------------------------------------------------------------------------------------------------------------------------------------------------------------------------------------------------------------------------------------------------------------------------------------------------------------------------------------------------------------------------------------------------------------------------------------------------------------------------------------------------------------------------------------------------------------------------------------------------------------------------------------------------------------------------------------------------------------------------------------------------------------------------------------------------------------------------------------------------------------------------------------------------------------------------------------------------------------------------------------------------------------------------------------------------------------------------------------------------------------------------------------------------------------------------------------------------------------------------------------------------------------------------------------------------------------------------------------------------------------------------------------------------------------------------------------------------------------------------------------------------------------------------------------------------------------------------------------------------------------------------------------------------------------------------------------------------------------------------------------------------------------------------------------------------------------------------------------------------------------------------------------------------------------------------------------------------------------------------------------------------------------------------|------------------------------------------------------------------------------------------------------------------------------------------------------------------------------------------------------------------------------------------------------------------------------------------------------------------------------------------------------------------------------------------------------------------------------------------------------------------------------|
| Up_AD | <p>(1) (H)K INFLAMMATORY RESPONSE, (2) (H)K EPITHELIAL MESENCHYMAL TRANSITION, (3) (H)K TNFA SIGNALING VIA NFKB, (4) (H)K IL2 STAT5 SIGNALING, (5) (H)K HYPOXIA, (6) (R) EXTRACELLULAR MATRIX ORGANIZATION, (7) (R) CELL SURFACE INTERACTIONS AT THE VASCULAR WALL, (8) (R) COLLAGEN FORMATION, (9) (R) ASSEMBLY OF COLLAGEN FIBRILS AND OTHER MULTIMERIC STRUCTURES, (10) (K) PATHWAYS IN CANCER, (11) (R) NON INTEGRIN MEMBRANE ECM INTERACTIONS, (12) (PID) INTEGRIN1 PATHWAY, (13) (R) SIGNALING BY INTERLEUKINS, (14) (R) SYNDECAN INTERACTIONS, (15) (GO) BIOLOGICAL ADHESION, (16) (GO) CARDIOVASCULAR SYSTEM DEVELOPMENT, (17) (GO) CELL ACTIVATION, (18) (GO) CELL CELL ADHESION, (19) (GO) CELL MOTILITY, (20) (GO) CHROMOSOME, (21) (GO) CYTOKINE MEDIATED SIGNALING PATHWAY, (22) (GO) CYTOKINE PRODUCTION, (23) (GO) DEFENSE RESPONSE, (24) (GO) EMBRYO DEVELOPMENT, (25) (GO) E(PID)ERMIS DEVELOPMENT, (26) (GO) EPITHELIAL CELL DIFFERENTIATION, (27) (GO) EPITHELIUM DEVELOPMENT, (28) (GO) EXTRACELLULAR STRUCTURE ORGANIZATION, (29) (GO) IMMUNE SYSTEM DEVELOPMENT, (30) (GO) LEUKOCYTE CELL CELL ADHESION, (31) (GO) LEUKOCYTE MIGRATION, (32) (GO) LOCOMOTION, (33) (GO) LYMPHOCYTE ACTIVATION, (34) (GO) POSITIVE REGULATION OF IMMUNE SYSTEM PROCESS, (35) (GO) REGULATION OF CELL ACTIVATION, (36) (GO) REGULATION OF CELL ADHESION, (37) (GO) REGULATION OF CELL POPULATION PROLIFERATION, (38) (GO) REGULATION OF IMMUNE SYSTEM PROCESS, (39) (GO) REGULATION OF LYMPHOCYTE ACTIVATION, (40) (GO) RESPONSE TO BIOTIC STIMULUS, (41) (GO) RESPONSE TO WOUNDING, (42) (GO) SKIN DEVELOPMENT, (43) (GO) TUBE DEVELOPMENT, (44) (GO) TUBE MORPHOGENESIS, (45) (GO) T CELL ACTIVATION, (46) (GO) WOUND HEALING, (47) (GO) RESPONSE TO CYTOKINE, (48) (GO) REGULATION OF T CELL ACTIVATION, (49) (GO) REGULATION OF CELL CELL ADHESION, (50) (GO) POSITIVE REGULATION OF CELL ADHESION, (51) (GO) EMBRYO DEVELOPMENT ENDING IN BIRTH OR EGG HATCHING, (52) (GO) DEFENSE RESPONSE TO OTHER ORGANISM, (53) (GO) REGULATION OF IMMUNE RESPONSE, (54) (GO) POSITIVE REGULATION OF INTRACELLULAR SIGNAL TRANSDUCTION, (55) (GO) KERATINOCYTE DIFFERENTIATION, (56) (GO) TISSUE MORPHOGENESIS, (57) (GO) MYELOID CELL DIFFERENTIATION, (58) (GO) POSITIVE REGULATION OF LEUKOCYTE CELL CELL ADHESION, (59) (GO) REGULATION OF CELLULAR COMPONENT MOVEMENT, (60) (GO) POSITIVE REGULATION OF CELL CELL ADHESION, (61) (GO) EPITHELIAL CELL PROLIFERATION, (62) (GO) POSITIVE REGULATION OF LOCOMOTION, (63) (GO) PATTERN RECOGNITION RECEPTOR SIGNALING PATHWAY, (64) (GO) CELL SUBSTRATE ADHESION, (65) (GO) INNATE IMMUNE RESPONSE, (66) (GO) POSITIVE</p> | <p>(1) (H)K KRAS SIGNALING DN, (2) (R) CLASS A 1 RHODOPSIN LIKE RECEPTORS, (3) (R) GPCR LIGAND BINDING, (4) (K) MATURITY ONSET DIABETES OF THE YOUNG, (5) (GO) INTRINSIC COMPONENT OF PLASMA MEMBRANE, (6) (GO) MOLECULAR TRANSDUCER ACTIVITY, (7) (GO) G PROTEIN COUPLED RECEPTOR ACTIVITY, (8) (GO) RECEPTOR REGULATOR ACTIVITY, (9) (GO) SENSORY PERCEPTION OF LIGHT STIMULUS, (10) (GO) PEPTIDE RECEPTOR ACTIVITY, (11) (GO) SENSORY PERCEPTION OF CHEMICAL STIMULUS</p> |

|         |                                                                                                                                                                                                                                                                                                                                                                                                                                                                                                                                                                                                                                                                                                                                                                                                                                                                                                                                                                                                                                                                                                                                                                                                                                                                                                                                                                                                                                                                                                                                                                                                                                                                                                                                                                                                                                                                                                                                                                                                                                                                                                                                                                                                                                                                                                 |                                                                                                                                                                                                                                                                                                                                                                                                                                                                                                                                                                                                                                                                                                                                                                                                                                                             |
|---------|-------------------------------------------------------------------------------------------------------------------------------------------------------------------------------------------------------------------------------------------------------------------------------------------------------------------------------------------------------------------------------------------------------------------------------------------------------------------------------------------------------------------------------------------------------------------------------------------------------------------------------------------------------------------------------------------------------------------------------------------------------------------------------------------------------------------------------------------------------------------------------------------------------------------------------------------------------------------------------------------------------------------------------------------------------------------------------------------------------------------------------------------------------------------------------------------------------------------------------------------------------------------------------------------------------------------------------------------------------------------------------------------------------------------------------------------------------------------------------------------------------------------------------------------------------------------------------------------------------------------------------------------------------------------------------------------------------------------------------------------------------------------------------------------------------------------------------------------------------------------------------------------------------------------------------------------------------------------------------------------------------------------------------------------------------------------------------------------------------------------------------------------------------------------------------------------------------------------------------------------------------------------------------------------------|-------------------------------------------------------------------------------------------------------------------------------------------------------------------------------------------------------------------------------------------------------------------------------------------------------------------------------------------------------------------------------------------------------------------------------------------------------------------------------------------------------------------------------------------------------------------------------------------------------------------------------------------------------------------------------------------------------------------------------------------------------------------------------------------------------------------------------------------------------------|
|         | <p>REGULATION OF IMMUNE RESPONSE, (67) (GO) POSITIVE REGULATION OF CYTOKINE PRODUCTION, (68) (GO) POSITIVE REGULATION OF SIGNALING, (69) (GO) CELL ADHESION MEDIATED BY INTEGRIN, (70) (GO) IMMUNE EFFECTOR PROCESS, (71) (GO) MORPHOGENESIS OF AN EPITHELIUM, (72) (GO) REGULATION OF RESPONSE TO EXTERNAL STIMULUS, (73) (GO) REGULATION OF HEMOPOIESIS, (74) (GO) ANCHORING JUNCTION, (75) (GO) POSITIVE REGULATION OF PROTEIN MODIFICATION PROCESS, (76) (GO) I KAPPAB KINASE NF KAPPAB SIGNALING, (77) (GO) PHA(GO)CYTOSIS, (78) (GO) REGULATION OF ANATOMICAL STRUCTURE MORPHOGENESIS, (79) (GO) INTEGRIN MEDIATED SIGNALING PATHWAY, (80) (GO) ACTIVATION OF IMMUNE RESPONSE, (81) (GO) REGULATION OF DEFENSE RESPONSE</p>                                                                                                                                                                                                                                                                                                                                                                                                                                                                                                                                                                                                                                                                                                                                                                                                                                                                                                                                                                                                                                                                                                                                                                                                                                                                                                                                                                                                                                                                                                                                                               |                                                                                                                                                                                                                                                                                                                                                                                                                                                                                                                                                                                                                                                                                                                                                                                                                                                             |
| Down_AD | <p>(1) (H)K MYC TARGETS V1, (2) (H)K MTORC1 SIGNALING, (3) (H)K PROTEIN SECRETION, (4) (H)K DNA REPAIR, (5) (K) PROTEASOME, (6) (R) ANTIGEN PROCESSING UBIQUITINATION PROTEASOME DEGRADATION, (7) (R) APC C CDH1 MEDIATED DEGRADATION OF CDC20 AND OTHER APC C CDH1 TARGETED PROTEINS IN LATE MITOSIS EARLY G1, (8) (R) ASSEMBLY OF THE PRE REPLICATIVE COMPLEX, (9) (R) AUF1 HNRNP D0 BINDS AND DESTABILIZES MRNA, (10) (R) CELL CYCLE CHECKPOINTS, (11) (R) CLASS I MHC MEDIATED ANTIGEN PROCESSING PRESENTATION, (12) (R) CROSS PRESENTATION OF SOLUBLE EXOGENOUS ANTIGENS ENDOSOMES, (13) (R) DEFECTIVE CFTR CAUSES CYSTIC FIBROSIS, (14) (R) DEGRADATION OF DVL, (15) (R) DEGRADATION OF GLI1 BY THE PROTEASOME, (16) (R) DNA REPLICATION, (17) (R) HEDGEHOG LIGAND BIOGENESIS, (18) (R) HIV INFECTION, (19) (R) HOST INTERACTIONS OF HIV FACTORS, (20) (R) MEMBRANE TRAFFICKING, (21) (R) METABOLISM OF RNA, (22) (R) MITOTIC G2 G2 M PHASES, (23) (R) MITOTIC METAPHASE AND ANAPHASE, (24) (R) NEGATIVE REGULATION OF NOTCH4 SIGNALING, (25) (R) ORC1 REMOVAL FROM CHROMATIN, (26) (R) REGULATION OF PTEN STABILITY AND ACTIVITY, (27) (R) REGULATION OF RAS BY GAPS, (28) (R) REGULATION OF RUNX2 EXPRESSION AND ACTIVITY, (29) (R) SEPARATION OF SISTER CHROMATIDS, (30) (R) SWITCHING OF ORIGINS TO A POST REPLICATIVE STATE, (31) (R) DEGRADATION OF AXIN, (32) (R) METABOLISM OF POLYAMINES, (33) (R) POST TRANSLATIONAL PROTEIN MODIFICATION, (34) (R) THE ROLE OF GTSE1 IN G2 M PROGRESSION AFTER G2 CHECKPOINT, (35) (R) APC C MEDIATED DEGRADATION OF CELL CYCLE PROTEINS, (36) (R) CELLULAR RESPONSE TO HYPOXIA, (37) (R) DNA REPLICATION PRE INITIATION, (38) (R) STABILIZATION OF P53, (39) (R) ORGANELLE BIOGENESIS AND MAINTENANCE, (40) (R) SCF SKP2 MEDIATED DEGRADATION OF P27 P21, (41) (R) VESICLE MEDIATED TRANSPORT, (42) (R) REGULATION OF RUNX3 EXPRESSION AND ACTIVITY, (43) (R) S PHASE, (44) (R) G2 M CHECKPOINTS, (45) (R) ASYMMETRIC LOCALIZATION OF PCP PROTEINS, (46) (R) DECTIN 1 MEDIATED NONCANONICAL NF KB SIGNALING, (47) (R) REGULATION OF MRNA STABILITY BY PROTEINS THAT BIND AU RICH ELEMENTS, (48) (R) ABC TRANSPORTER DISORDERS, (49) (R) ABC FAMILY PROTEINS MEDIATED TRANSPORT, (50) (R) HEDGEHOG OFF STATE, (51) (R) NUCLEOTIDE EXCISION</p> | <p>(1) (R) NEURONAL SYSTEM, (2) (R) TRANSMISSION ACROSS CHEMICAL SYNAPSES, (3) (GO) NEURON PROJECTION, (4) (GO) POSTSYNAPSE, (5) (GO) PRESYNAPSE, (6) (GO) SYNAPSE, (7) (GO) SYNAPTIC MEMBRANE, (8) (GO) SYNAPTIC SIGNALING, (9) (GO) REGULATION OF TRANS SYNAPTIC SIGNALING, (10) (GO) REGULATION OF SYNAPTIC PLASTICITY, (11) (GO) POSTSYNAPTIC MEMBRANE, (12) (GO) MONOVALENT INORGANIC CATION TRANSPORT, (13) (GO) BEHAVIOR, (14) (GO) MONOVALENT INORGANIC CATION TRANSMEMBRANE TRANSPORTER ACTIVITY, (15) (GO) PRESYNAPTIC MEMBRANE, (16) (GO) CATION TRANSMEMBRANE TRANSPORT, (17) (GO) POSTSYNAPTIC SPECIALIZATION MEMBRANE, (18) (GO) POSTSYNAPTIC DENSITY MEMBRANE, (19) (GO) TRANSMEMBRANE TRANSPORT, (20) (GO) INORGANIC ION TRANSMEMBRANE TRANSPORT, (21) (GO) ION TRANSMEMBRANE TRANSPORT, (22) (GO) GLUTAMATE RECEPTOR SIGNALING PATHWAY</p> |



REPAIR, (52) (R) FCERI MEDIATED NF KB ACTIVATION, (53) (R) CYCLIN A CDK2 ASSOCIATED EVENTS AT S PHASE ENTRY, (54) (R) DOWNSTREAM SIGNALING EVENTS OF B CELL RECEPTOR BCR, (55) (R) PROCESSING OF CAPPED INTRON CONTAINING PRE MRNA, (56) (R) G1 S DNA DAMAGE CHECKPOINTS, (57) (R) CELL CYCLE, (58) (R) PCP CE PATHWAY, (59) (R) M PHASE, (60) (R) SIGNALING BY HEDGEHOG, (61) (R) UCH PROTEINASES, (62) (R) HIV LIFE CYCLE, (63) (R) MAPK6 MAPK4 SIGNALING, (64) (R) HEDGEHOG ON STATE, (65) (R) SIGNALING BY NOTCH4, (66) (R) CELL CYCLE MITOTIC, (67) (R) (GO)LGI TO ER RETROGRADE TRANSPORT, (68) (R) PTEN REGULATION, (69) (R) CELLULAR RESPONSES TO EXTERNAL STIMULI, (70) (R) MRNA SPLICING, (71) (R) GLOBAL GENOME NUCLEOTIDE EXCISION REPAIR GG NER, (72) (R) MITOTIC G1 PHASE AND G1 S TRANSITION, (73) (R) DEGRADATION OF BETA CATENIN BY THE DESTRUCTION COMPLEX, (74) (R) UB SPECIFIC PROCESSING PROTEASES, (75) (R) FC EPSILON RECEPTOR FCERI SIGNALING, (76) (R) INFECTIOUS DISEASE, (77) (R) MHC CLASS II ANTIGEN PRESENTATION, (78) (R) NERVOUS SYSTEM DEVELOPMENT, (79) (K) RNA DEGRADATION, (80) (K) UBIQUITIN MEDIATED PROTEOLYSIS, (81) (R) DEUBIQUITINATION, (82) (R) INTRA (GO)LGI AND RETROGRADE (GO)LGI TO ER TRAFFIC, (83) (R) CILIUM ASSEMBLY, (84) (R) ANTIGEN PROCESSING CROSS PRESENTATION, (85) (R) VIRAL MESSENGER RNA SYNTHESIS, (86) (GO) ANAPHASE PROMOTING COMPLEX DEPENDENT CATABOLIC PROCESS, (87) (GO) CATALYTIC ACTIVITY ACTING ON RNA, (88) (GO) CATALYTIC COMPLEX, (89) (GO) CELLULAR MACROMOLECULE CATABOLIC PROCESS, (90) (GO) CELLULAR MACROMOLECULE LOCALIZATION, (91) (GO) CELLULAR PROTEIN CATABOLIC PROCESS, (92) (GO) CELLULAR PROTEIN CONTAINING COMPLEX ASSEMBLY, (93) (GO) ENDOPEPTIDASE COMPLEX, (94) (GO) ENVELOPE, (95) (GO) (GO)LGI VESICLE TRANSPORT, (96) (GO) HYDROLASE ACTIVITY ACTING ON ACID ANHYDRIDES, (97) (GO) INTRACELLULAR PROTEIN TRANSPORT, (98) (GO) INTRACELLULAR TRANSPORT, (99) (GO) MACROAUTOPHAGY, (100) (GO) MODIFICATION DEPENDENT MACROMOLECULE CATABOLIC PROCESS, (101) (GO) PEPTIDASE COMPLEX, (102) (GO) PROTEASOMAL PROTEIN CATABOLIC PROCESS, (103) (GO) PROTEIN CONTAINING COMPLEX ASSEMBLY, (104) (GO) PROTEIN MODIFICATION BY SMALL PROTEIN CONJUGATION, (105) (GO) PROTEIN MODIFICATION BY SMALL PROTEIN CONJUGATION OR REMOVAL, (106) (GO) RIBONUCLEOPROTEIN COMPLEX, (107) (GO) RNA BINDING, (108) (GO) RNA PROCESSING, (109) (GO) SCF DEPENDENT PROTEASOMAL UBIQUITIN DEPENDENT PROTEIN CATABOLIC PROCESS, (110) (GO) REGULATION OF CELLULAR AMINO ACID METABOLIC PROCESS, (111) (GO) MEMBRANE ORGANIZATION, (112) (GO) RIBONUCLEOTIDE BINDING, (113) (GO) REGULATION OF CELL CYCLE G2 M PHASE TRANSITION, (114) (GO) CELL CYCLE G2 M PHASE TRANSITION, (115) (GO) PROTEIN POLYUBIQUITINATION, (116) (GO) PROTEIN CATABOLIC PROCESS, (117) (GO) NUCLEOLUS, (118) (GO) NEGATIVE REGULATION OF CELL CYCLE G2 M PHASE TRANSITION, (119) (GO) PROTEIN LOCALIZATION TO ORGANELLE, (120) (GO) PROTEIN MODIFICATION BY SMALL PROTEIN REMOVAL, (121) (GO) POSTTRANSCRIPTIONAL

|  |                                                                                                                                                                                                                                                                                                                                                                                                                                                                                                                                                                                                                                                                                                                                                                                                                                                                                                                                                                                                                                                                                                                                                                                                                                                                                                                                                                                                                                                                                                                                                                                                                                                                                                                                                                                                                                                                        |  |
|--|------------------------------------------------------------------------------------------------------------------------------------------------------------------------------------------------------------------------------------------------------------------------------------------------------------------------------------------------------------------------------------------------------------------------------------------------------------------------------------------------------------------------------------------------------------------------------------------------------------------------------------------------------------------------------------------------------------------------------------------------------------------------------------------------------------------------------------------------------------------------------------------------------------------------------------------------------------------------------------------------------------------------------------------------------------------------------------------------------------------------------------------------------------------------------------------------------------------------------------------------------------------------------------------------------------------------------------------------------------------------------------------------------------------------------------------------------------------------------------------------------------------------------------------------------------------------------------------------------------------------------------------------------------------------------------------------------------------------------------------------------------------------------------------------------------------------------------------------------------------------|--|
|  | <p>REGULATION OF GENE EXPRESSION, (122) (GO) PROTEIN CONTAINING COMPLEX DISASSEMBLY, (123) (GO) TRANSFERASE COMPLEX, (124) (GO) MRNA METABOLIC PROCESS, (125) (GO) ORGANELLE LOCALIZATION, (126) (GO) REGULATION OF TRANSCRIPTION FROM RNA POLYMERASE II PROMOTER IN RESPONSE TO HYPOXIA, (127) (GO) MICROTUBULE CYTOSKELETON, (128) (GO) VESICLE ORGANIZATION, (129) (GO) ADENYL NUCLEOTIDE BINDING, (130) (GO) ANTIGEN PROCESSING AND PRESENTATION OF PEPTIDE ANTIGEN, (131) (GO) MACROMOLECULE CATABOLIC PROCESS, (132) (GO) MICROTUBULE BASED PROCESS, (133) (GO) PROCESS UTILIZING AUTOPHAGIC MECHANISM, (134) (GO) (GO) LIGAND MEMBRANE, (135) (GO) PROTEASOME ACCESSORY COMPLEX, (136) (GO) VACUOLAR TRANSPORT, (137) (GO) RNA SPLICING VIA TRANSESTERIFICATION REACTIONS, (138) (GO) REGULATION OF MRNA CATABOLIC PROCESS, (139) (GO) ANTIGEN PROCESSING AND PRESENTATION OF EXOGENOUS PEPTIDE ANTIGEN VIA MHC CLASS I, (140) (GO) ENDOSOMAL TRANSPORT, (141) (GO) PROTEIN CONTAINING COMPLEX LOCALIZATION, (142) (GO) RNA CATABOLIC PROCESS, (143) (GO) CELLULAR COMPONENT DISASSEMBLY, (144) (GO) FC EPSILON RECEPTOR SIGNALING PATHWAY, (145) (GO) REGULATION OF MACROAUTOPHAGY, (146) (GO) ORGANELLE SUBCOMPARTMENT, (147) (GO) NUCLEAR ENVELOPE, (148) (GO) DRUG BINDING, (149) (GO) REGULATION OF CATABOLIC PROCESS, (150) (GO) ATPASE ACTIVITY, (151) (GO) ESTABLISHMENT OF ORGANELLE LOCALIZATION, (152) (GO) UBIQUITIN LIKE PROTEIN LIGASE BINDING, (153) (GO) PROTEASOME REGULATORY PARTICLE BASE SUBCOMPLEX, (154) (GO) MRNA PROCESSING, (155) (GO) RNA LOCALIZATION, (156) (GO) INTERLEUKIN 1 MEDIATED SIGNALING PATHWAY, (157) (GO) REGULATION OF CELLULAR CATABOLIC PROCESS, (158) (GO) RNA SPLICING, (159) (GO) ANTIGEN PROCESSING AND PRESENTATION, (160) (GO) ORGANONITROGEN COMPOUND CATABOLIC PROCESS, (161) (GO) ENDOSOME ORGANIZATION</p> |  |
|--|------------------------------------------------------------------------------------------------------------------------------------------------------------------------------------------------------------------------------------------------------------------------------------------------------------------------------------------------------------------------------------------------------------------------------------------------------------------------------------------------------------------------------------------------------------------------------------------------------------------------------------------------------------------------------------------------------------------------------------------------------------------------------------------------------------------------------------------------------------------------------------------------------------------------------------------------------------------------------------------------------------------------------------------------------------------------------------------------------------------------------------------------------------------------------------------------------------------------------------------------------------------------------------------------------------------------------------------------------------------------------------------------------------------------------------------------------------------------------------------------------------------------------------------------------------------------------------------------------------------------------------------------------------------------------------------------------------------------------------------------------------------------------------------------------------------------------------------------------------------------|--|

**Table S13.** Jointly deregulated pathways in AD and PRCA.

|       | Up_PRCA | Down_PRCA                                                                                                                                                                                                                                                                                                                                                                                                                                                                                                                                                                     |
|-------|---------|-------------------------------------------------------------------------------------------------------------------------------------------------------------------------------------------------------------------------------------------------------------------------------------------------------------------------------------------------------------------------------------------------------------------------------------------------------------------------------------------------------------------------------------------------------------------------------|
| Up_AD |         | <p>(1) (H)K EPITHELIAL MESENCHYMAL TRANSITION, (2) (H)K MYOGENESIS, (3) (H)K HYPOXIA, (4) NABA CORE MATRISOME, (5) NABA MATRISOME, (6) (R) EXTRACELLULAR MATRIX ORGANIZATION, (7) (GO) ANATOMICAL STRUCTURE FORMATION INVOLVED IN MORPHOGENESIS, (8) (GO) ANIMAL ORGAN MORPHOGENESIS, (9) (GO) BIOLOGICAL ADHESION, (10) (GO) BLOOD VESSEL MORPHOGENESIS, (11) (GO) BONE DEVELOPMENT, (12) (GO) CARDIOVASCULAR SYSTEM DEVELOPMENT, (13) (GO) CELL MOTILITY, (14) (GO) CELL SURFACE, (15) (GO) CIRCULATORY SYSTEM DEVELOPMENT, (16) (GO) COLLAGEN CONTAINING EXTRACELLULAR</p> |

MATRIX, (17) (GO) CONNECTIVE TISSUE DEVELOPMENT, (18) (GO) EMBRYONIC MORPHOGENESIS, (19) (GO) EMBRYONIC ORGAN DEVELOPMENT, (20) (GO) EMBRYO DEVELOPMENT, (21) (GO) EPITHELIAL CELL DIFFERENTIATION, (22) (GO) EPITHELIUM DEVELOPMENT, (23) (GO) EXTRACELLULAR MATRIX, (24) (GO) EXTRACELLULAR MATRIX STRUCTURAL CONSTITUENT, (25) (GO) EXTRACELLULAR STRUCTURE ORGANIZATION, (26) (GO) INTRINSIC COMPONENT OF PLASMA MEMBRANE, (27) (GO) LOCOMOTION, (28) (GO) NEGATIVE REGULATION OF DEVELOPMENTAL PROCESS, (29) (GO) NEGATIVE REGULATION OF MULTICELLULAR ORGANISMAL PROCESS, (30) (GO) POSITIVE REGULATION OF DEVELOPMENTAL PROCESS, (31) (GO) REGULATION OF CELL ADHESION, (32) (GO) REGULATION OF CELL POPULATION PROLIFERATION, (33) (GO) REGULATION OF VASCULATURE DEVELOPMENT, (34) (GO) RESPONSE TO WOUNDING, (35) (GO) SENSORY ORGAN DEVELOPMENT, (36) (GO) SKELETAL SYSTEM DEVELOPMENT, (37) (GO) SKELETAL SYSTEM MORPHOGENESIS, (38) (GO) TUBE DEVELOPMENT, (39) (GO) TUBE MORPHOGENESIS, (40) (GO) UROGENITAL SYSTEM DEVELOPMENT, (41) (GO) WOUND HEALING, (42) (GO) POSITIVE REGULATION OF MULTICELLULAR ORGANISMAL PROCESS, (43) (GO) RENAL SYSTEM DEVELOPMENT, (44) (GO) CARTILAGE DEVELOPMENT, (45) (GO) SENSORY SYSTEM DEVELOPMENT, (46) (GO) MUSCLE STRUCTURE DEVELOPMENT, (47) (GO) POSITIVE REGULATION OF CELL ADHESION, (48) (GO) HEART DEVELOPMENT, (49) (GO) REGULATION OF CELL DIFFERENTIATION, (50) (GO) NEGATIVE REGULATION OF CELL DIFFERENTIATION, (51) (GO) DIGESTIVE SYSTEM DEVELOPMENT, (52) (GO) TISSUE MORPHOGENESIS, (53) (GO) REGULATION OF CELLULAR COMPONENT MOVEMENT, (54) (GO) POSITIVE REGULATION OF LOCOMOTION, (55) (GO) CELL SUBSTRATE ADHESION, (56) (GO) SIGNALING RECEPTOR BINDING, (57) (GO) HEART MORPHOGENESIS, (58) (GO) RESPONSE TO GROWTH FACTOR, (59) (GO) POSITIVE REGULATION OF CELL DIFFERENTIATION, (60) (GO) ENDOTHELIAL CELL APOPTOTIC PROCESS, (61) (GO) POSITIVE REGULATION OF PHOSPHORUS

|         |                                                                                                                                                                                                                                                                                                                                                                                                                                                                                                                                                                                                                                                                                                                                                                                                                                                                                                                                                                                                                                                                                                                                                                                                                                                                                                                                                                                                                                                                                                                                                                                                                                                                                                                                                                                                                                                                                                                                                                                                                                                                                              |                                                                                                                                                                                                                                                                                                                                                                                                                                                                                                                                                                                                  |
|---------|----------------------------------------------------------------------------------------------------------------------------------------------------------------------------------------------------------------------------------------------------------------------------------------------------------------------------------------------------------------------------------------------------------------------------------------------------------------------------------------------------------------------------------------------------------------------------------------------------------------------------------------------------------------------------------------------------------------------------------------------------------------------------------------------------------------------------------------------------------------------------------------------------------------------------------------------------------------------------------------------------------------------------------------------------------------------------------------------------------------------------------------------------------------------------------------------------------------------------------------------------------------------------------------------------------------------------------------------------------------------------------------------------------------------------------------------------------------------------------------------------------------------------------------------------------------------------------------------------------------------------------------------------------------------------------------------------------------------------------------------------------------------------------------------------------------------------------------------------------------------------------------------------------------------------------------------------------------------------------------------------------------------------------------------------------------------------------------------|--------------------------------------------------------------------------------------------------------------------------------------------------------------------------------------------------------------------------------------------------------------------------------------------------------------------------------------------------------------------------------------------------------------------------------------------------------------------------------------------------------------------------------------------------------------------------------------------------|
|         |                                                                                                                                                                                                                                                                                                                                                                                                                                                                                                                                                                                                                                                                                                                                                                                                                                                                                                                                                                                                                                                                                                                                                                                                                                                                                                                                                                                                                                                                                                                                                                                                                                                                                                                                                                                                                                                                                                                                                                                                                                                                                              | <p>METABOLIC PROCESS, (62) (GO) POSITIVE REGULATION OF SIGNALING, (63) (GO) CHONDROCYTE DIFFERENTIATION, (64) (GO) MESENCHYME DEVELOPMENT, (65) (GO) MORPHOGENESIS OF AN EPITHELIUM, (66) (GO) BASEMENT MEMBRANE, (67) (GO) ANCHORING JUNCTION, (68) (GO) NEGATIVE REGULATION OF CELL POPULATION PROLIFERATION, (69) (GO) TAXIS, (70) (GO) REGULATION OF FAT CELL DIFFERENTIATION, (71) (GO) CARDIAC CHAMBER MORPHOGENESIS, (72) (GO) REGULATION OF CELLULAR RESPONSE TO GROWTH FACTOR STIMULUS, (73) (GO) REGULATION OF ANATOMICAL STRUCTURE MORPHOGENESIS, (74) (GO) MUSCLE SYSTEM PROCESS</p> |
| Down_AD | <p>(1) (H)K MYC TARGETS V1, (2) (H)K MTORC1 SIGNALING, (3) (H)K UNFOLDED PROTEIN RESPONSE, (4) (R) ASPARAGINE N LINKED GLYCOSYLATION, (5) (R) CELL CYCLE CHECKPOINTS, (6) (R) METABOLISM OF RNA, (7) (R) MITOCHONDRIAL TRANSLATION, (8) (R) MITOTIC METAPHASE AND ANAPHASE, (9) (R) TRANSLATION, (10) (R) G2 M CHECKPOINTS, (11) (R) CELL CYCLE, (12) (R) M PHASE, (13) (R) TRNA AMINOACYLATION, (14) (R) CELL CYCLE MITOTIC, (15) (K) AMINOACYL TRNA BIOSYNTHESIS, (16) (R) METABOLISM OF AMINO ACIDS AND DERIVATIVES, (17) (R) CYTOSOLIC TRNA AMINOACYLATION, (18) (R) TRNA PROCESSING, (19) (R) RRNA PROCESSING, (20) (R) RRNA MODIFICATION IN THE NUCLEUS AND CYTOSOL, (21) (GO) AMIDE BIOSYNTHETIC PROCESS, (22) (GO) CATALYTIC ACTIVITY ACTING ON RNA, (23) (GO) CELLULAR AMIDE METABOLIC PROCESS, (24) (GO) MITOCHONDRIAL GENE EXPRESSION, (25) (GO) MITOCHONDRIAL MATRIX, (26) (GO) MITOCHONDRIAL PROTEIN COMPLEX, (27) (GO) MITOCHONDRIAL TRANSLATION, (28) (GO) MITOCHONDRION, (29) (GO) NCRNA METABOLIC PROCESS, (30) (GO) NCRNA PROCESSING, (31) (GO) ORGANONITROGEN COMPOUND BIOSYNTHETIC PROCESS, (32) (GO) PEPTIDE BIOSYNTHETIC PROCESS, (33) (GO) PEPTIDE METABOLIC PROCESS, (34) (GO) RIBONUCLEOPROTEIN COMPLEX, (35) (GO) RIBONUCLEOPROTEIN COMPLEX BIOGENESIS, (36) (GO) RIBOSOME, (37) (GO) RIBOSOME BIOGENESIS, (38) (GO) RNA BINDING, (39) (GO) RNA PROCESSING, (40) (GO) TRNA METABOLIC PROCESS, (41) (GO) CELLULAR AMINO ACID METABOLIC PROCESS, (42) (GO) RIBOSOMAL SUBUNIT, (43) (GO) CATALYTIC ACTIVITY ACTING ON A TRNA, (44) (GO) NUCLEOLUS, (45) (GO) RRNA METABOLIC PROCESS, (46) (GO) STRUCTURAL CONSTITUENT OF RIBOSOME, (47) (GO) AMINO ACID ACTIVATION, (48) (GO) RIBONUCLEOPROTEIN COMPLEX SUBUNIT ORGANIZATION, (49) (GO) SMALL MOLECULE METABOLIC PROCESS, (50) (GO) LARGE RIBOSOMAL SUBUNIT, (51) (GO) ADENYL NUCLEOTIDE BINDING, (52) (GO) LIGASE ACTIVITY FORMING CARBON OXYGEN BONDS, (53) (GO) RIBONUCLEOPROTEIN COMPLEX BINDING, (54) (GO) DRUG BINDING, (55) (GO) ATPASE ACTIVITY, (56) (GO) CYTOPLASMIC TRANSLATION, (57) (GO) PRERIBOSOME</p> | <p>(1) (GO) SYNAPSE, (2) (GO) REGULATION OF NEURON PROJECTION DEVELOPMENT</p>                                                                                                                                                                                                                                                                                                                                                                                                                                                                                                                    |

**Table S14.** Jointly deregulated pathways in AD and SKCM.

|         | Up_SKCM                                                                                                                                                                                                                                                                                                                                                                                                                                                                                                                                                                                                                                                                                                                                                                                                                                                                                                   | Down_SKCM                                                                                                                                                                                                                                                                                                                                                                                                                                                                                                                                                                                                                                                                                                                                                                                                                                                                                                                                                                               |
|---------|-----------------------------------------------------------------------------------------------------------------------------------------------------------------------------------------------------------------------------------------------------------------------------------------------------------------------------------------------------------------------------------------------------------------------------------------------------------------------------------------------------------------------------------------------------------------------------------------------------------------------------------------------------------------------------------------------------------------------------------------------------------------------------------------------------------------------------------------------------------------------------------------------------------|-----------------------------------------------------------------------------------------------------------------------------------------------------------------------------------------------------------------------------------------------------------------------------------------------------------------------------------------------------------------------------------------------------------------------------------------------------------------------------------------------------------------------------------------------------------------------------------------------------------------------------------------------------------------------------------------------------------------------------------------------------------------------------------------------------------------------------------------------------------------------------------------------------------------------------------------------------------------------------------------|
| Up_AD   | <p>(1) (H)K INFLAMMATORY RESPONSE, (2) (H)K ALLOGRAFT REJECTION, (3) (R) IMMUNOREGULATORY INTERACTIONS BETWEEN A LYMPHOID AND A NON LYMPHOID CELL, (4) (GO) ADAPTIVE IMMUNE RESPONSE, (5) (GO) CELL ACTIVATION, (6) (GO) CYTOKINE MEDIATED SIGNALING PATHWAY, (7) (GO) CYTOKINE PRODUCTION, (8) (GO) DEFENSE RESPONSE, (9) (GO) POSITIVE REGULATION OF IMMUNE SYSTEM PROCESS, (10) (GO) REGULATION OF IMMUNE SYSTEM PROCESS, (11) (GO) RESPONSE TO BIOTIC STIMULUS, (12) (GO) DEFENSE RESPONSE TO OTHER ORGANISM, (13) (GO) REGULATION OF IMMUNE RESPONSE, (14) (GO) CELLULAR RESPONSE TO BIOTIC STIMULUS, (15) (GO) INNATE IMMUNE RESPONSE, (16) (GO) POSITIVE REGULATION OF IMMUNE RESPONSE, (17) (GO) IMMUNE EFFECTOR PROCESS, (18) (GO) ACTIVATION OF IMMUNE RESPONSE, (19) (GO) REGULATION OF DEFENSE RESPONSE</p>                                                                                   | <p>(1) (H)K MYOGENESIS, (2) NABA CORE MATRISOME, (3) NABA ECM GLYCOPROTEINS, (4) (R) KERATINIZATION, (5) (R) FORMATION OF THE CORNIFIED ENVELOPE, (6) (GO) ANIMAL ORGAN MORPHOGENESIS, (7) (GO) CIRCULATORY SYSTEM DEVELOPMENT, (8) (GO) E(PID)ERMIS DEVELOPMENT, (9) (GO) EPITHELIAL CELL DIFFERENTIATION, (10) (GO) EPITHELIUM DEVELOPMENT, (11) (GO) SKIN DEVELOPMENT, (12) (GO) UROGENITAL SYSTEM DEVELOPMENT, (13) (GO) E(PID)ERMAL CELL DIFFERENTIATION, (14) (GO) RENAL SYSTEM DEVELOPMENT, (15) (GO) MUSCLE STRUCTURE DEVELOPMENT, (16) (GO) HEART DEVELOPMENT, (17) (GO) GLAND DEVELOPMENT, (18) (GO) KIDNEY EPITHELIUM DEVELOPMENT, (19) (GO) KERATINOCYTE DIFFERENTIATION, (20) (GO) MUSCLE ORGAN DEVELOPMENT, (21) (GO) EPITHELIAL CELL PROLIFERATION, (22) (GO) REPRODUCTIVE SYSTEM DEVELOPMENT, (23) (GO) KERATINIZATION, (24) (GO) ANCHORING JUNCTION, (25) (GO) MOLTING CYCLE, (26) (GO) CORNIFICATION, (27) (GO) KERATIN FILAMENT, (28) (GO) MOLTING CYCLE PROCESS</p> |
| Down_AD | <p>(1) (H)K MTORC1 SIGNALING, (2) (H)K DNA REPAIR, (3) (H)K UNFOLDED PROTEIN RESPONSE, (4) (R) APC C CDH1 MEDIATED DEGRADATION OF CDC20 AND OTHER APC C CDH1 TARGETED PROTEINS IN LATE MITOSIS EARLY G1, (5) (R) ASSEMBLY OF THE PRE REPLICATIVE COMPLEX, (6) (R) CELL CYCLE CHECKPOINTS, (7) (R) DNA REPLICATION, (8) (R) HIV INFECTION, (9) (R) MITOTIC G2 G2 M PHASES, (10) (R) MITOTIC METAPHASE AND ANAPHASE, (11) (R) ORC1 REMOVAL FROM CHROMATIN, (12) (R) SEPARATION OF SISTER CHROMATIDS, (13) (R) SWITCHING OF ORIGINS TO A POST REPLICATIVE STATE, (14) (R) APC C MEDIATED DEGRADATION OF CELL CYCLE PROTEINS, (15) (R) DNA REPLICATION PRE INITIATION, (16) (R) S PHASE, (17) (R) G2 M CHECKPOINTS, (18) (R) CELL CYCLE, (19) (R) M PHASE, (20) (R) CELL CYCLE MITOTIC, (21) (R) MITOTIC G1 PHASE AND G1 S TRANSITION, (22) (R) ANTIGEN PROCESSING CROSS PRESENTATION, (23) (GO) ANAPHASE</p> | <p>(1) (H)K FATTY ACID METABOLISM, (2) (GO) RIBOSOMAL SUBUNIT, (3) (GO) PROTEIN TARGETING, (4) (GO) STRUCTURAL CONSTITUENT OF RIBOSOME, (5) (GO) OXIDATION REDUCTION PROCESS, (6) (GO) PROTEIN LOCALIZATION TO MEMBRANE, (7) (GO) OXIDOREDUCTASE ACTIVITY, (8) (GO) ESTABLISHMENT OF PROTEIN LOCALIZATION TO MEMBRANE</p>                                                                                                                                                                                                                                                                                                                                                                                                                                                                                                                                                                                                                                                               |

|  |                                                                                                                                                                                                                                                                                                                                                                                                                                                                                                                                     |  |
|--|-------------------------------------------------------------------------------------------------------------------------------------------------------------------------------------------------------------------------------------------------------------------------------------------------------------------------------------------------------------------------------------------------------------------------------------------------------------------------------------------------------------------------------------|--|
|  | <p>PROMOTING COMPLEX DEPENDENT CATABOLIC PROCESS, (24) (GO) CATALYTIC ACTIVITY ACTING ON RNA, (25) (GO) HYDROLASE ACTIVITY ACTING ON ACID ANHYDRIDES, (26) (GO) REGULATION OF CELL CYCLE G2 M PHASE TRANSITION, (27) (GO) CELL CYCLE G2 M PHASE TRANSITION, (28) (GO) ORGANELLE LOCALIZATION, (29) (GO) MICROTUBULE CYTOSKELETON, (30) (GO) ANTIGEN PROCESSING AND PRESENTATION OF PEPTIDE ANTIGEN, (31) (GO) ATPASE ACTIVITY, (32) (GO) ESTABLISHMENT OF ORGANELLE LOCALIZATION, (33) (GO) ANTIGEN PROCESSING AND PRESENTATION</p> |  |
|--|-------------------------------------------------------------------------------------------------------------------------------------------------------------------------------------------------------------------------------------------------------------------------------------------------------------------------------------------------------------------------------------------------------------------------------------------------------------------------------------------------------------------------------------|--|

**Table S15.** Jointly deregulated pathways in PD and BRNCA.

|       | Up_BRNCA                                                                                                                                                                                                                                                                                                                                                                                                                                                                                                                                                                                                                                                                                                                                                                                                                                                                                                                                                                                                                                                                                                                                                                                                                                                                                           | Down_BRNCA |
|-------|----------------------------------------------------------------------------------------------------------------------------------------------------------------------------------------------------------------------------------------------------------------------------------------------------------------------------------------------------------------------------------------------------------------------------------------------------------------------------------------------------------------------------------------------------------------------------------------------------------------------------------------------------------------------------------------------------------------------------------------------------------------------------------------------------------------------------------------------------------------------------------------------------------------------------------------------------------------------------------------------------------------------------------------------------------------------------------------------------------------------------------------------------------------------------------------------------------------------------------------------------------------------------------------------------|------------|
| Up_PD | <p>(1) (H)K INFLAMMATORY RESPONSE, (2) (H)K IL6 JAK STAT3 SIGNALING, (3) (H)K TNFA SIGNALING VIA NFKB, (4) (H)K IL2 STAT5 SIGNALING, (5) (H)K INTERFERON GAMMA RESPONSE, (6) (H)K P53 PATHWAY, (7) (H)K INTERFERON ALPHA RESPONSE, (8) (K) CYTOKINE CYTOKINE RECEPTOR INTERACTION, (9) (R) EXTRACELLULAR MATRIX ORGANIZATION, (10) (R) COLLAGEN FORMATION, (11) (K) PATHWAYS IN CANCER, (12) (R) INTEGRIN CELL SURFACE INTERACTIONS, (13) (R) COLLAGEN BIOSYNTHESIS AND MODIFYING ENZYMES, (14) (BC) NFKB PATHWAY, (15) (PID) E2F PATHWAY, (16) (R) RNA POLYMERASE II TRANSCRIPTION, (17) (R) RESPONSE OF EIF2AK4 GCN2 TO AMINO ACID DEFICIENCY, (18) (R) EUKARYOTIC TRANSLATION ELONGATION, (19) (GO) ADAPTIVE IMMUNE RESPONSE, (20) (GO) ANATOMICAL STRUCTURE FORMATION INVOLVED IN MORPHOGENESIS, (21) (GO) BIOLOGICAL ADHESION, (22) (GO) BLOOD VESSEL MORPHOGENESIS, (23) (GO) CARDIOVASCULAR SYSTEM DEVELOPMENT, (24) (GO) CELL ACTIVATION, (25) (GO) CHROMATIN, (26) (GO) CHROMOSOME, (27) (GO) CIRCULATORY SYSTEM DEVELOPMENT, (28) (GO) CIS REGULATORY REGION BINDING, (29) (GO) COLLAGEN CONTAINING EXTRACELLULAR MATRIX, (30) (GO) CYTOKINE MEDIATED SIGNALING PATHWAY, (31) (GO) CYTOKINE PRODUCTION, (32) (GO) DEFENSE RESPONSE, (33) (GO) DOUBLE STRANDED DNA BINDING, (34) (GO)</p> |            |

EMBRYO DEVELOPMENT, (35) (GO)  
EXTRACELLULAR STRUCTURE  
ORGANIZATION, (36) (GO) IMMUNE  
SYSTEM DEVELOPMENT, (37) (GO)  
INFLAMMATORY RESPONSE, (38) (GO)  
LEUKOCYTE CELL CELL ADHESION, (39)  
(GO) LEUKOCYTE PROLIFERATION, (40)  
(GO) LYMPHOCYTE ACTIVATION, (41)  
(GO) NEGATIVE REGULATION OF  
BIOSYNTHETIC PROCESS, (42) (GO)  
NEGATIVE REGULATION OF IMMUNE  
SYSTEM PROCESS, (43) (GO) NEGATIVE  
REGULATION OF NUCLEOBASE  
CONTAINING COMPOUND METABOLIC  
PROCESS, (44) (GO) NEGATIVE  
REGULATION OF RNA BIOSYNTHETIC  
PROCESS, (45) (GO) NEGATIVE  
REGULATION OF TRANSCRIPTION BY  
RNA POLYMERASE II, (46) (GO)  
NUCLEAR CHROMOSOME, (47) (GO)  
POSITIVE REGULATION OF CELLULAR  
BIOSYNTHETIC PROCESS, (48) (GO)  
POSITIVE REGULATION OF IMMUNE  
SYSTEM PROCESS, (49) (GO) POSITIVE  
REGULATION OF NUCLEOBASE  
CONTAINING COMPOUND METABOLIC  
PROCESS, (50) (GO) POSITIVE  
REGULATION OF RNA METABOLIC  
PROCESS, (51) (GO) POSITIVE  
REGULATION OF TRANSCRIPTION BY  
RNA POLYMERASE II, (52) (GO) POSITIVE  
REGULATION OF VASCULATURE  
DEVELOPMENT, (53) (GO) REGULATION  
OF CELL ACTIVATION, (54) (GO)  
REGULATION OF CELL ADHESION, (55)  
(GO) REGULATION OF CELL  
POPULATION PROLIFERATION, (56) (GO)  
REGULATION OF IMMUNE SYSTEM  
PROCESS, (57) (GO) REGULATION OF  
LEUKOCYTE PROLIFERATION, (58) (GO)  
REGULATION OF LYMPHOCYTE  
ACTIVATION, (59) (GO) REGULATION OF  
VASCULATURE DEVELOPMENT, (60)  
(GO) RESPONSE TO BACTERIUM, (61)  
(GO) RESPONSE TO BIOTIC STIMULUS,  
(62) (GO) RESPONSE TO MOLECULE OF  
BACTERIAL ORIGIN, (63) (GO)  
SEQUENCE SPECIFIC DNA BINDING, (64)  
(GO) SEQUENCE SPECIFIC DOUBLE  
STRANDED DNA BINDING, (65) (GO)  
SKELETAL SYSTEM DEVELOPMENT, (66)  
(GO) TRANSCRIPTION REGULATOR  
ACTIVITY, (67) (GO) TUBE  
DEVELOPMENT, (68) (GO) TUBE  
MORPHOGENESIS, (69) (GO) T CELL  
ACTIVATION, (70) (GO) T CELL  
DIFFERENTIATION, (71) (GO) POSITIVE  
REGULATION OF CELL ACTIVATION,  
(72) (GO) RESPONSE TO CYTOKINE, (73)  
(GO) REGULATION OF T CELL  
ACTIVATION, (74) (GO) T CELL  
PROLIFERATION, (75) (GO) EMBRYO  
DEVELOPMENT ENDING IN BIRTH OR



EGG HATCHING, (76) (GO) DEFENSE  
RESPONSE TO OTHER ORGANISM, (77)  
(GO) REGULATION OF IMMUNE  
RESPONSE, (78) (GO) REGULATION OF  
IMMUNE EFFECTOR PROCESS, (79) (GO)  
TUMOR NECROSIS FACTOR  
SUPERFAMILY CYTOKINE  
PRODUCTION, (80) (GO) CELLULAR  
RESPONSE TO BIOTIC STIMULUS, (81)  
(GO) ADAPTIVE IMMUNE RESPONSE  
BASED ON SOMATIC RECOMBINATION  
OF IMMUNE RECEPTORS BUILT FROM  
IMMUNOGLOBULIN SUPERFAMILY  
DOMAINS, (82) (GO) INTERLEUKIN 6  
PRODUCTION, (83) (GO) GROWTH  
FACTOR BINDING, (84) (GO) POSITIVE  
REGULATION OF LOCOMOTION, (85)  
(GO) TRANSCRIPTION FACTOR  
COMPLEX, (86) (GO) PATTERN  
RECOGNITION RECEPTOR SIGNALING  
PATHWAY, (87) (GO) INNATE IMMUNE  
RESPONSE, (88) (GO) POSITIVE  
REGULATION OF IMMUNE RESPONSE,  
(89) (GO) COLLAGEN METABOLIC  
PROCESS, (90) (GO) POSITIVE  
REGULATION OF CYTOKINE  
PRODUCTION, (91) (GO) IMMUNE  
EFFECTOR PROCESS, (92) (GO) TOLL  
LIKE RECEPTOR SIGNALING PATHWAY,  
(93) (GO) REGULATION OF RESPONSE  
TO EXTERNAL STIMULUS, (94) (GO) I  
KAPPAB KINASE NF KAPPAB  
SIGNALING, (95) (GO) POSITIVE  
REGULATION OF TUMOR NECROSIS  
FACTOR SUPERFAMILY CYTOKINE  
PRODUCTION, (96) (GO) CELLULAR  
RESPONSE TO VASCULAR  
ENDOTHELIAL GROWTH FACTOR  
STIMULUS, (97) (GO) CHROMATIN  
BINDING, (98) (GO) REGULATION OF  
ADAPTIVE IMMUNE RESPONSE, (99)  
(GO) ACTIVATION OF IMMUNE  
RESPONSE, (100) (GO) REGULATION OF  
DEFENSE RESPONSE, (101) (GO)  
REGULATION OF RESPONSE TO  
CYTOKINE STIMULUS, (102) (GO) CELL  
SUBSTRATE JUNCTION, (103) (GO)  
POSITIVE REGULATION OF I KAPPAB  
KINASE NF KAPPAB SIGNALING, (104)  
(GO) MYELOID LEUKOCYTE  
ACTIVATION, (105) (GO) CELL  
ACTIVATION INVOLVED IN IMMUNE  
RESPONSE, (106) (GO) LEUKOCYTE  
MEDIATED IMMUNITY, (107) (GO)  
NEGATIVE REGULATION OF CELL  
CYCLE G1 S PHASE TRANSITION, (108)  
(GO) NEGATIVE REGULATION OF  
MULTI ORGANISM PROCESS, (109) (GO)  
REGULATION OF RESPONSE TO STRESS,  
(110) (GO) NUCLEAR SPECK, (111) (GO)  
CHROMOSOME ORGANIZATION, (112)  
(GO) INTERSPECIES INTERACTION  
BETWEEN ORGANISMS, (113) (GO)



|         | NUCLEAR BODY, (114) (GO) CHROMATIN ORGANIZATION, (115) (GO) REGULATION OF GENE EXPRESSION EPIGENETIC                                                                                                                                                                                                                                                                                                                                                                                                                                                                                                                                                                                                                                                                                                                                                                                                                                                                                                                                                                                    |                                                                                                                                                                                                                                                                                                                                                                                                                                                                                                                                                                                                                                                                                                                                                                                                                                                                                                                                                                                                                                                                                                                                                                                                                                                                                                                                                                                                                                                                                                                                                                                                                                                                                                                                                                                                                                                                       |
|---------|-----------------------------------------------------------------------------------------------------------------------------------------------------------------------------------------------------------------------------------------------------------------------------------------------------------------------------------------------------------------------------------------------------------------------------------------------------------------------------------------------------------------------------------------------------------------------------------------------------------------------------------------------------------------------------------------------------------------------------------------------------------------------------------------------------------------------------------------------------------------------------------------------------------------------------------------------------------------------------------------------------------------------------------------------------------------------------------------|-----------------------------------------------------------------------------------------------------------------------------------------------------------------------------------------------------------------------------------------------------------------------------------------------------------------------------------------------------------------------------------------------------------------------------------------------------------------------------------------------------------------------------------------------------------------------------------------------------------------------------------------------------------------------------------------------------------------------------------------------------------------------------------------------------------------------------------------------------------------------------------------------------------------------------------------------------------------------------------------------------------------------------------------------------------------------------------------------------------------------------------------------------------------------------------------------------------------------------------------------------------------------------------------------------------------------------------------------------------------------------------------------------------------------------------------------------------------------------------------------------------------------------------------------------------------------------------------------------------------------------------------------------------------------------------------------------------------------------------------------------------------------------------------------------------------------------------------------------------------------|
| Down_PD | (1) (H)K MTORC1 SIGNALING, (2) (R) APC C CDH1 MEDIATED DEGRADATION OF CDC20 AND OTHER APC C CDH1 TARGETED PROTEINS IN LATE MITOSIS EARLY G1, (3) (R) ASSEMBLY OF THE PRE REPLICATIVE COMPLEX, (4) (R) AUF1 HNRNP D0 BINDS AND DESTABILIZES MRNA, (5) (R) CELL CYCLE CHECKPOINTS, (6) (R) DNA REPLICATION, (7) (R) HIV INFECTION, (8) (R) MITOTIC METAPHASE AND ANAPHASE, (9) (R) ORC1 REMOVAL FROM CHROMATIN, (10) (R) SEPARATION OF SISTER CHROMATIDS, (11) (R) SWITCHING OF ORIGINS TO A POST REPLICATIVE STATE, (12) (R) APC C MEDIATED DEGRADATION OF CELL CYCLE PROTEINS, (13) (R) DNA REPLICATION PRE INITIATION, (14) (R) STABILIZATION OF P53, (15) (R) REGULATION OF RUNX3 EXPRESSION AND ACTIVITY, (16) (R) G2 M CHECKPOINTS, (17) (R) CYCLIN A CDK2 ASSOCIATED EVENTS AT S PHASE ENTRY, (18) (R) G1 S DNA DAMAGE CHECKPOINTS, (19) (R) M PHASE, (20) (R) SIGNALING BY NOTCH4, (21) (GO) ANAPHASE PROMOTING COMPLEX DEPENDENT CATABOLIC PROCESS, (22) (GO) MITOCHONDRIAL GENE EXPRESSION, (23) (GO) MITOCHONDRIAL MATRIX, (24) (GO) CARBOHYDRATE DERIVATIVE METABOLIC PROCESS | (1) (R) MEMBRANE TRAFFICKING, (2) (R) NEURONAL SYSTEM, (3) (R) TRANSMISSION ACROSS CHEMICAL SYNAPSES, (4) (R) VESICLE MEDIATED TRANSPORT, (5) (K) CARDIAC MUSCLE CONTRACTION, (6) (R) NEUROTRANSMITTER RECEPTORS AND POSTSYNAPTIC SIGNAL TRANSMISSION, (7) (R) ACTIVATION OF NMDA RECEPTORS AND POSTSYNAPTIC EVENTS, (8) (R) PROTEIN PROTEIN INTERACTIONS AT SYNAPSES, (9) (R) L1CAM INTERACTIONS, (10) (R) NEUROTRANSMITTER RELEASE CYCLE, (11) (R) TRAFFICKING OF AMPA RECEPTORS, (12) (R) TRANSPORT OF SMALL MOLECULES, (13) (R) PHASE 0 RA(PID) DEPOLARISATION, (14) (GO) AXON, (15) (GO) EXOCYTIC VESICLE, (16) (GO) GLUTAMATERGIC SYNAPSE, (17) (GO) MEMBRANE PROTEIN COMPLEX, (18) (GO) NEURON PROJECTION, (19) (GO) NEURON TO NEURON SYNAPSE, (20) (GO) POSTSYNAPSE, (21) (GO) PRESYNAPSE, (22) (GO) SOMATODENDRITIC COMPARTMENT, (23) (GO) SYNAPSE, (24) (GO) SYNAPTIC MEMBRANE, (25) (GO) SYNAPTIC SIGNALING, (26) (GO) TRANSPORT VESICLE, (27) (GO) VESICLE MEDIATED TRANSPORT IN SYNAPSE, (28) (GO) TRANSPORT VESICLE MEMBRANE, (29) (GO) DENDRITIC TREE, (30) (GO) SYNAPTIC VESICLE MEMBRANE, (31) (GO) MEMBRANE ORGANIZATION, (32) (GO) REGULATION OF TRANS SYNAPTIC SIGNALING, (33) (GO) REGULATION OF SYNAPTIC PLASTICITY, (34) (GO) CELL BODY, (35) (GO) REGULATION OF SYNAPTIC VESICLE CYCLE, (36) (GO) POSTSYNAPTIC MEMBRANE, (37) (GO) MONOVALENT INORGANIC CATION TRANSPORT, (38) (GO) SYNAPTIC VESICLE EXOCYTOSIS, (39) (GO) BEHAVIOR, (40) (GO) MONOVALENT INORGANIC CATION TRANSMEMBRANE TRANSPORTER ACTIVITY, (41) (GO) DISTAL AXON, (42) (GO) NEUROTRANSMITTER SECRETION, (43) (GO) PRESYNAPTIC MEMBRANE, (44) (GO) VESICLE LOCALIZATION, (45) (GO) CATION TRANSMEMBRANE TRANSPORT, (46) (GO) GABA ERGIC SYNAPSE, (47) (GO) SYNAPTIC VESICLE RECYCLING, (48) (GO) AXON CYTOPLASM, (49) (GO) POSTSYNAPTIC SPECIALIZATION MEMBRANE, (50) (GO) |

|  |  |                                                                                                                                                                                                                                                                                                                                                                                                                                                                                                                                                                                                                                                                                                                                                                                                                                                                                                                                                                                                                                                                                                                                                                                                                                                                                                                                                                                                                                                                                                                                                                                                                                                                                                                                                                                                                                                                                                                                                                                                                                            |
|--|--|--------------------------------------------------------------------------------------------------------------------------------------------------------------------------------------------------------------------------------------------------------------------------------------------------------------------------------------------------------------------------------------------------------------------------------------------------------------------------------------------------------------------------------------------------------------------------------------------------------------------------------------------------------------------------------------------------------------------------------------------------------------------------------------------------------------------------------------------------------------------------------------------------------------------------------------------------------------------------------------------------------------------------------------------------------------------------------------------------------------------------------------------------------------------------------------------------------------------------------------------------------------------------------------------------------------------------------------------------------------------------------------------------------------------------------------------------------------------------------------------------------------------------------------------------------------------------------------------------------------------------------------------------------------------------------------------------------------------------------------------------------------------------------------------------------------------------------------------------------------------------------------------------------------------------------------------------------------------------------------------------------------------------------------------|
|  |  | <p> POSTSYNAPTIC DENSITY MEMBRANE, (51) (GO) NEUROTRANSMITTER TRANSPORT, (52) (GO) MICROTUBULE BASED TRANSPORT, (53) (GO) REGULATION OF NEURONAL SYNAPTIC PLASTICITY, (54) (GO) PRESYNAPTIC ACTIVE ZONE, (55) (GO) REGULATION OF SYNAPTIC VESICLE EXOCYTOSIS, (56) (GO) TRANSMEMBRANE TRANSPORT, (57) (GO) INORGANIC ION TRANSMEMBRANE TRANSPORT, (58) (GO) CYTOSKELETON DEPENDENT INTRACELLULAR TRANSPORT, (59) (GO) SITE OF POLARIZED GROWTH, (60) (GO) SYNAPSE ORGANIZATION, (61) (GO) ION TRANSMEMBRANE TRANSPORT, (62) (GO) SYNAPTIC VESICLE ENDOCYTOSIS, (63) (GO) SCHAFER COLLATERAL CA1 SYNAPSE, (64) (GO) REGULATION OF NEUROTRANSMITTER TRANSPORT, (65) (GO) TUBULIN BINDING, (66) (GO) REGULATION OF NEUROTRANSMITTER SECRETION, (67) (GO) REGULATION OF POSTSYNAPTIC MEMBRANE POTENTIAL, (68) (GO) REGULATION OF SYNAPSE STRUCTURE OR ACTIVITY, (69) (GO) INTRINSIC COMPONENT OF SYNAPTIC MEMBRANE, (70) (GO) SYNAPTIC TRANSMISSION GLUTAMATERGIC, (71) (GO) EXCITATORY SYNAPSE, (72) (GO) INTRINSIC COMPONENT OF POSTSYNAPTIC SPECIALIZATION MEMBRANE, (73) (GO) ACIDIC AMINO ACID TRANSPORT, (74) (GO) CATION CHANNEL COMPLEX, (75) (GO) CATION TRANSMEMBRANE TRANSPORTER ACTIVITY, (76) (GO) REGULATION OF MEMBRANE POTENTIAL, (77) (GO) CYTOPLASMIC REGION, (78) (GO) CLATHRIN BINDING, (79) (GO) ESTABLISHMENT OF LOCALIZATION IN CELL, (80) (GO) INTRINSIC COMPONENT OF POSTSYNAPTIC MEMBRANE, (81) (GO) REGULATION OF NEUROTRANSMITTER LEVELS, (82) (GO) NEURON DEVELOPMENT, (83) (GO) REGULATION OF EXOCYTOSIS, (84) (GO) ION TRANSMEMBRANE TRANSPORTER ACTIVITY, (85) (GO) SIGNAL RELEASE, (86) (GO) CELL PART MORPHOGENESIS, (87) (GO) NEURON PROJECTION TERMINUS, (88) (GO) CATION TRANSPORT, (89) (GO) CELL MORPHOGENESIS INVOLVED IN NEURON DIFFERENTIATION, (90) (GO) TRANSPORTER COMPLEX, (91) (GO) AMINE TRANSPORT, (92) (GO) SYNAPSE ASSEMBLY, (93) (GO) TRANSPORTER ACTIVITY, (94) (GO) ION TRANSPORT, (95) (GO) CATION CHANNEL ACTIVITY, (96) (GO) REGULATION OF SYNAPSE ASSEMBLY, (97) (GO) CELL CELL </p> |
|--|--|--------------------------------------------------------------------------------------------------------------------------------------------------------------------------------------------------------------------------------------------------------------------------------------------------------------------------------------------------------------------------------------------------------------------------------------------------------------------------------------------------------------------------------------------------------------------------------------------------------------------------------------------------------------------------------------------------------------------------------------------------------------------------------------------------------------------------------------------------------------------------------------------------------------------------------------------------------------------------------------------------------------------------------------------------------------------------------------------------------------------------------------------------------------------------------------------------------------------------------------------------------------------------------------------------------------------------------------------------------------------------------------------------------------------------------------------------------------------------------------------------------------------------------------------------------------------------------------------------------------------------------------------------------------------------------------------------------------------------------------------------------------------------------------------------------------------------------------------------------------------------------------------------------------------------------------------------------------------------------------------------------------------------------------------|

|  |  |                                                                                                                                       |
|--|--|---------------------------------------------------------------------------------------------------------------------------------------|
|  |  | SIGNALING, (98) (GO) DOPAMINE<br>TRANSPORT, (99) (GO)<br>CATECHOLAMINE SECRETION, (100)<br>(GO) NEUROTRANSMITTER RECEPTOR<br>ACTIVITY |
|--|--|---------------------------------------------------------------------------------------------------------------------------------------|

**Table S16.** Jointly deregulated pathways in PD and KDNCA.

|       | Up_KDNCA                                                                                                                                                                                                                                                                                                                                                                                                                                                                                                                                                                                                                                                                                                                                                                                                                                                                                                                                                                                                                                                                                                                                                                                                                                                                                                                                                                                                                                                                                                                                                                                                                                                                                       | Down_KDNCA |
|-------|------------------------------------------------------------------------------------------------------------------------------------------------------------------------------------------------------------------------------------------------------------------------------------------------------------------------------------------------------------------------------------------------------------------------------------------------------------------------------------------------------------------------------------------------------------------------------------------------------------------------------------------------------------------------------------------------------------------------------------------------------------------------------------------------------------------------------------------------------------------------------------------------------------------------------------------------------------------------------------------------------------------------------------------------------------------------------------------------------------------------------------------------------------------------------------------------------------------------------------------------------------------------------------------------------------------------------------------------------------------------------------------------------------------------------------------------------------------------------------------------------------------------------------------------------------------------------------------------------------------------------------------------------------------------------------------------|------------|
| Up_PD | <p>(1) (H)K INFLAMMATORY RESPONSE, (2) (H)K IL6 JAK STAT3 SIGNALING, (3) (H)K TNFA SIGNALING VIA NFKB, (4) (H)K IL2 STAT5 SIGNALING, (5) (H)K INTERFERON GAMMA RESPONSE, (6) (H)K P53 PATHWAY, (7) (H)K INTERFERON ALPHA RESPONSE, (8) (K) CYTOKINE CYTOKINE RECEPTOR INTERACTION, (9) (PID) E2F PATHWAY, (10) (R) RNA POLYMERASE II TRANSCRIPTION, (11) (GO) ADAPTIVE IMMUNE RESPONSE, (12) (GO) BIOLOGICAL ADHESION, (13) (GO) BLOOD VESSEL MORPHOGENESIS, (14) (GO) CELL ACTIVATION, (15) (GO) CELL CELL ADHESION, (16) (GO) CELL MOTILITY, (17) (GO) CHROMOSOME, (18) (GO) CYTOKINE MEDIATED SIGNALING PATHWAY, (19) (GO) CYTOKINE PRODUCTION, (20) (GO) DEFENSE RESPONSE, (21) (GO) IMMUNE SYSTEM DEVELOPMENT, (22) (GO) INFLAMMATORY RESPONSE, (23) (GO) LEUKOCYTE CELL CELL ADHESION, (24) (GO) LEUKOCYTE DIFFERENTIATION, (25) (GO) LEUKOCYTE PROLIFERATION, (26) (GO) LYMPHOCYTE ACTIVATION, (27) (GO) LYMPHOCYTE DIFFERENTIATION, (28) (GO) NEGATIVE REGULATION OF BIOSYNTHETIC PROCESS, (29) (GO) NEGATIVE REGULATION OF IMMUNE SYSTEM PROCESS, (30) (GO) NEGATIVE REGULATION OF NUCLEOBASE CONTAINING COMPOUND METABOLIC PROCESS, (31) (GO) POSITIVE REGULATION OF IMMUNE SYSTEM PROCESS, (32) (GO) REGULATION OF CELL ACTIVATION, (33) (GO) REGULATION OF CELL ADHESION, (34) (GO) REGULATION OF IMMUNE SYSTEM PROCESS, (35) (GO) REGULATION OF LEUKOCYTE PROLIFERATION, (36) (GO) REGULATION OF LYMPHOCYTE ACTIVATION, (37) (GO) RESPONSE TO BACTERIUM, (38) (GO) RESPONSE TO BIOTIC STIMULUS, (39) (GO) RESPONSE TO MOLECULE OF BACTERIAL ORIGIN, (40) (GO) T CELL ACTIVATION, (41) (GO) REGULATION OF LEUKOCYTE DIFFERENTIATION, (42) (GO) NEGATIVE REGULATION OF CYTOKINE</p> |            |

PRODUCTION, (43) (GO) T CELL  
DIFFERENTIATION, (44) (GO) POSITIVE  
REGULATION OF CELL ACTIVATION,  
(45) (GO) RESPONSE TO CYTOKINE, (46)  
(GO) REGULATION OF T CELL  
ACTIVATION, (47) (GO) T CELL  
PROLIFERATION, (48) (GO) DEFENSE  
RESPONSE TO OTHER ORGANISM, (49)  
(GO) REGULATION OF IMMUNE  
RESPONSE, (50) (GO) REGULATION OF  
IMMUNE EFFECTOR PROCESS, (51) (GO)  
B CELL ACTIVATION, (52) (GO) POSITIVE  
REGULATION OF INTRACELLULAR  
SIGNAL TRANSDUCTION, (53) (GO)  
TUMOR NECROSIS FACTOR  
SUPERFAMILY CYTOKINE  
PRODUCTION, (54) (GO) NEGATIVE  
REGULATION OF CELL ACTIVATION,  
(55) (GO) CELLULAR RESPONSE TO  
BIOTIC STIMULUS, (56) (GO) MYELOID  
CELL DIFFERENTIATION, (57) (GO)  
ADAPTIVE IMMUNE RESPONSE BASED  
ON SOMATIC RECOMBINATION OF  
IMMUNE RECEPTORS BUILT FROM  
IMMUNOGLOBULIN SUPERFAMILY  
DOMAINS, (58) (GO) NEGATIVE  
REGULATION OF LYMPHOCYTE  
ACTIVATION, (59) (GO) INTERLEUKIN 6  
PRODUCTION, (60) (GO) POSITIVE  
REGULATION OF LOCOMOTION, (61)  
(GO) PATTERN RECOGNITION  
RECEPTOR SIGNALING PATHWAY, (62)  
(GO) INNATE IMMUNE RESPONSE, (63)  
(GO) POSITIVE REGULATION OF  
INTERLEUKIN 6 PRODUCTION, (64) (GO)  
POSITIVE REGULATION OF IMMUNE  
RESPONSE, (65) (GO) POSITIVE  
REGULATION OF CYTOKINE  
PRODUCTION, (66) (GO) IMMUNE  
EFFECTOR PROCESS, (67) (GO) TOLL  
LIKE RECEPTOR SIGNALING PATHWAY,  
(68) (GO) REGULATION OF LEUKOCYTE  
MEDIATED IMMUNITY, (69) (GO)  
REGULATION OF RESPONSE TO  
EXTERNAL STIMULUS, (70) (GO)  
POSITIVE REGULATION OF LEUKOCYTE  
DIFFERENTIATION, (71) (GO)  
LYMPHOCYTE ACTIVATION INVOLVED  
IN IMMUNE RESPONSE, (72) (GO) I  
KAPPAB KINASE NF KAPPAB  
SIGNALING, (73) (GO) PHA(GO)CYTOSIS,  
(74) (GO) POSITIVE REGULATION OF  
TUMOR NECROSIS FACTOR  
SUPERFAMILY CYTOKINE  
PRODUCTION, (75) (GO) REGULATION  
OF ADAPTIVE IMMUNE RESPONSE, (76)  
(GO) ACTIVATION OF IMMUNE  
RESPONSE, (77) (GO) REGULATION OF  
DEFENSE RESPONSE, (78) (GO)  
REGULATION OF LYMPHOCYTE  
MEDIATED IMMUNITY, (79) (GO)  
LEUKOCYTE APOPTOTIC PROCESS, (80)  
(GO) REGULATION OF RESPONSE TO

|         |                                                                                                                                                                                                                                                                                                                                                                                                                                                                                                                                                                                                                                                                                                                                                                                                                                                                                                                           |                                                                                                                                                                                                                                                                                                                                                                                                                                                                                                                                                                                                                                                                                                                                                                                                                                                                                                                                                                                                                                                                                                                                                                                                                                                                                                                                                                                                                                                                                                                                           |
|---------|---------------------------------------------------------------------------------------------------------------------------------------------------------------------------------------------------------------------------------------------------------------------------------------------------------------------------------------------------------------------------------------------------------------------------------------------------------------------------------------------------------------------------------------------------------------------------------------------------------------------------------------------------------------------------------------------------------------------------------------------------------------------------------------------------------------------------------------------------------------------------------------------------------------------------|-------------------------------------------------------------------------------------------------------------------------------------------------------------------------------------------------------------------------------------------------------------------------------------------------------------------------------------------------------------------------------------------------------------------------------------------------------------------------------------------------------------------------------------------------------------------------------------------------------------------------------------------------------------------------------------------------------------------------------------------------------------------------------------------------------------------------------------------------------------------------------------------------------------------------------------------------------------------------------------------------------------------------------------------------------------------------------------------------------------------------------------------------------------------------------------------------------------------------------------------------------------------------------------------------------------------------------------------------------------------------------------------------------------------------------------------------------------------------------------------------------------------------------------------|
|         | <p> CYTOKINE STIMULUS, (81) (GO) CELL<br/> SUBSTRATE JUNCTION, (82) (GO)<br/> POSITIVE REGULATION OF I KAPPAB<br/> KINASE NF KAPPAB SIGNALING, (83)<br/> (GO) MYELOID LEUKOCYTE<br/> ACTIVATION, (84) (GO) CELL<br/> ACTIVATION INVOLVED IN IMMUNE<br/> RESPONSE, (85) (GO) LEUKOCYTE<br/> MEDIATED IMMUNITY, (86) (GO)<br/> REGULATION OF INTRACELLULAR<br/> SIGNAL TRANSDUCTION, (87) (GO)<br/> NEGATIVE REGULATION OF MULTI<br/> ORGANISM PROCESS, (88) (GO)<br/> REGULATION OF RESPONSE TO STRESS,<br/> (89) (GO) CHROMOSOME<br/> ORGANIZATION, (90) (GO)<br/> INTERSPECIES INTERACTION BETWEEN<br/> ORGANISMS, (91) (GO) NUCLEAR BODY,<br/> (92) (GO) REGULATION OF GENE<br/> EXPRESSION EPIGENETIC </p>                                                                                                                                                                                                             |                                                                                                                                                                                                                                                                                                                                                                                                                                                                                                                                                                                                                                                                                                                                                                                                                                                                                                                                                                                                                                                                                                                                                                                                                                                                                                                                                                                                                                                                                                                                           |
| Down_PD | <p> (1) (H)K MTORC1 SIGNALING, (2) (R)<br/> CELL CYCLE CHECKPOINTS, (3) (R) DNA<br/> REPLICATION, (4) (R) HIV INFECTION, (5)<br/> (R) HOST INTERACTIONS OF HIV<br/> FACTORS, (6) (R) MITOTIC G2 G2 M<br/> PHASES, (7) (R) MITOTIC METAPHASE<br/> AND ANAPHASE, (8) (R) ORC1 REMOVAL<br/> FROM CHROMATIN, (9) (R) SEPARATION<br/> OF SISTER CHROMATIDS, (10) (R)<br/> SWITCHING OF ORIGINS TO A POST<br/> REPLICATIVE STATE, (11) (R) DNA<br/> REPLICATION PRE INITIATION, (12) (R)<br/> G2 M CHECKPOINTS, (13) (R) CYCLIN A<br/> CDK2 ASSOCIATED EVENTS AT S PHASE<br/> ENTRY, (14) (R) DOWNSTREAM<br/> SIGNALING EVENTS OF B CELL<br/> RECEPTOR BCR, (15) (R) M PHASE, (16) (R)<br/> SIGNALING BY NOTCH4, (17) (R) TNFR2<br/> NON CANONICAL NF KB PATHWAY, (18)<br/> (GO) CELL CYCLE G2 M PHASE<br/> TRANSITION, (19) (GO) ORGANELLE<br/> LOCALIZATION, (20) (GO)<br/> ESTABLISHMENT OF ORGANELLE<br/> LOCALIZATION </p> | <p> (1) (H)K OXIDATIVE<br/> PHOSPHORYLATION, (2) (H)K FATTY<br/> ACID METABOLISM, (3) (K) OXIDATIVE<br/> PHOSPHORYLATION, (4) (K)<br/> PARKINSONS DISEASE, (5) (R)<br/> RESPIRATORY ELECTRON TRANSPORT,<br/> (6) (R) RESPIRATORY ELECTRON<br/> TRANSPORT ATP SYNTHESIS BY<br/> CHEMIOSMOTIC COUPLING AND HEAT<br/> PRODUCTION BY UNCOUPLING<br/> PROTEINS, (7) (R) THE CITRIC ACID TCA<br/> CYCLE AND RESPIRATORY ELECTRON<br/> TRANSPORT, (8) (R) NEURONAL<br/> SYSTEM, (9) (R) TRANSMISSION ACROSS<br/> CHEMICAL SYNAPSES, (10) (R)<br/> PYRUVATE METABOLISM AND CITRIC<br/> ACID TCA CYCLE, (11) (K) CITRATE<br/> CYCLE TCA CYCLE, (12) (R) TRANSPORT<br/> OF SMALL MOLECULES, (13) (GO)<br/> AEROBIC RESPIRATION, (14) (GO) ATP<br/> SYNTHESIS COUPLED ELECTRON<br/> TRANSPORT, (15) (GO) CELLULAR<br/> RESPIRATION, (16) (GO) ELECTRON<br/> TRANSPORT CHAIN, (17) (GO)<br/> GENERATION OF PRECURSOR<br/> METABOLITES AND ENERGY, (18) (GO)<br/> INNER MITOCHONDRIAL MEMBRANE<br/> PROTEIN COMPLEX, (19) (GO)<br/> MITOCHONDRIAL ELECTRON<br/> TRANSPORT NADH TO UBIQUINONE,<br/> (20) (GO) MITOCHONDRIAL ENVELOPE,<br/> (21) (GO) MITOCHONDRIAL MATRIX,<br/> (22) (GO) MITOCHONDRIAL PROTEIN<br/> COMPLEX, (23) (GO) MITOCHONDRIAL<br/> RESPIRATORY CHAIN COMPLEX<br/> ASSEMBLY, (24) (GO) MITOCHONDRION,<br/> (25) (GO) NADH DEHYDROGENASE<br/> COMPLEX, (26) (GO) ORGANELLE INNER<br/> MEMBRANE, (27) (GO) OXIDATIVE<br/> PHOSPHORYLATION, (28) (GO) PROTON<br/> TRANSMEMBRANE TRANSPORT, (29)<br/> (GO) PROTON TRANSMEMBRANE </p> |

|  |  |                                                                                                                                                                                                                                                                                                                                                                                                                                                                                                                                                                                                                                                                                                                                                                                                                                                                                                                                                                                                                                                                                                                                                                                                                                                                                                                                                                                                                                                                                                                                                                                                                                                                                                                                                                                                                            |
|--|--|----------------------------------------------------------------------------------------------------------------------------------------------------------------------------------------------------------------------------------------------------------------------------------------------------------------------------------------------------------------------------------------------------------------------------------------------------------------------------------------------------------------------------------------------------------------------------------------------------------------------------------------------------------------------------------------------------------------------------------------------------------------------------------------------------------------------------------------------------------------------------------------------------------------------------------------------------------------------------------------------------------------------------------------------------------------------------------------------------------------------------------------------------------------------------------------------------------------------------------------------------------------------------------------------------------------------------------------------------------------------------------------------------------------------------------------------------------------------------------------------------------------------------------------------------------------------------------------------------------------------------------------------------------------------------------------------------------------------------------------------------------------------------------------------------------------------------|
|  |  | <p>TRANSPORTER ACTIVITY, (30) (GO)<br/> PROTON TRANSPORTING TWO SECTOR<br/> ATPASE COMPLEX, (31) (GO)<br/> RESPIRASOME, (32) (GO) RESPIRATORY<br/> CHAIN COMPLEX, (33) (GO)<br/> RESPIRATORY ELECTRON TRANSPORT<br/> CHAIN, (34) (GO) CELLULAR AMINO<br/> ACID METABOLIC PROCESS, (35) (GO)<br/> OXIDOREDUCTASE ACTIVITY ACTING<br/> ON NAD P H QUINONE OR SIMILAR<br/> COMPOUND AS ACCEPTOR, (36) (GO)<br/> TRICARBOXYLIC ACID CYCLE, (37) (GO)<br/> ORGANOPHOSPHATE METABOLIC<br/> PROCESS, (38) (GO) POSTSYNAPTIC<br/> MEMBRANE, (39) (GO) PURINE<br/> CONTAINING COMPOUND METABOLIC<br/> PROCESS, (40) (GO) NUCLEOBASE<br/> CONTAINING SMALL MOLECULE<br/> METABOLIC PROCESS, (41) (GO)<br/> OXIDATION REDUCTION PROCESS, (42)<br/> (GO) CRISTAE FORMATION, (43) (GO)<br/> MONOVALENT INORGANIC CATION<br/> TRANSPORT, (44) (GO) SMALL<br/> MOLECULE METABOLIC PROCESS, (45)<br/> (GO) MONOVALENT INORGANIC<br/> CATION TRANSMEMBRANE<br/> TRANSPORTER ACTIVITY, (46) (GO)<br/> CATION TRANSMEMBRANE<br/> TRANSPORT, (47) (GO)<br/> OXIDOREDUCTASE ACTIVITY, (48) (GO)<br/> TRANSMEMBRANE TRANSPORT, (49)<br/> (GO) INORGANIC ION<br/> TRANSMEMBRANE TRANSPORT, (50)<br/> (GO) ION TRANSMEMBRANE<br/> TRANSPORT, (51) (GO) COFACTOR<br/> METABOLIC PROCESS, (52) (GO)<br/> ORGANIC ACID METABOLIC PROCESS,<br/> (53) (GO) CATION TRANSMEMBRANE<br/> TRANSPORTER ACTIVITY, (54) (GO)<br/> DICARBOXYLIC ACID METABOLIC<br/> PROCESS, (55) (GO) REGULATION OF<br/> MEMBRANE POTENTIAL, (56) (GO) ION<br/> TRANSMEMBRANE TRANSPORTER<br/> ACTIVITY, (57) (GO) CATION<br/> TRANSPORT, (58) (GO) COFACTOR<br/> BINDING, (59) (GO) TRANSPORTER<br/> COMPLEX, (60) (GO) TRANSPORTER<br/> ACTIVITY, (61) (GO) ION TRANSPORT,<br/> (62) (GO) CATION CHANNEL ACTIVITY,<br/> (63) (GO) NEUROTRANSMITTER<br/> RECEPTOR ACTIVITY</p> |
|--|--|----------------------------------------------------------------------------------------------------------------------------------------------------------------------------------------------------------------------------------------------------------------------------------------------------------------------------------------------------------------------------------------------------------------------------------------------------------------------------------------------------------------------------------------------------------------------------------------------------------------------------------------------------------------------------------------------------------------------------------------------------------------------------------------------------------------------------------------------------------------------------------------------------------------------------------------------------------------------------------------------------------------------------------------------------------------------------------------------------------------------------------------------------------------------------------------------------------------------------------------------------------------------------------------------------------------------------------------------------------------------------------------------------------------------------------------------------------------------------------------------------------------------------------------------------------------------------------------------------------------------------------------------------------------------------------------------------------------------------------------------------------------------------------------------------------------------------|

**Table S17.** Jointly deregulated pathways in PD and STCA.

|       | Up_STCA                                                                                                                                                                                                                                       | Down_STCA |
|-------|-----------------------------------------------------------------------------------------------------------------------------------------------------------------------------------------------------------------------------------------------|-----------|
| Up_PD | <p>(1) (H)K INFLAMMATORY RESPONSE, (2)<br/> (H)K IL6 JAK STAT3 SIGNALING, (3) (H)K<br/> TNFA SIGNALING VIA NFKB, (4) (H)K IL2<br/> STAT5 SIGNALING, (5) (H)K<br/> INTERFERON GAMMA RESPONSE, (6)<br/> (H)K INTERFERON ALPHA RESPONSE, (7)</p> |           |

(R) EXTRACELLULAR MATRIX ORGANIZATION, (8) (R) COLLAGEN FORMATION, (9) (K) PATHWAYS IN CANCER, (10) (R) INTEGRIN CELL SURFACE INTERACTIONS, (11) (R) COLLAGEN BIOSYNTHESIS AND MODIFYING ENZYMES, (12) (PID) E2F PATHWAY, (13) (R) RNA POLYMERASE II TRANSCRIPTION, (14) (R) CHROMATIN MODIFYING ENZYMES, (15) (R) RESPONSE OF EIF2AK4 GCN2 TO AMINO ACID DEFICIENCY, (16) (R) EUKARYOTIC TRANSLATION ELONGATION, (17) (GO) ADAPTIVE IMMUNE RESPONSE, (18) (GO) ANATOMICAL STRUCTURE FORMATION INVOLVED IN MORPHOGENESIS, (19) (GO) BIOLOGICAL ADHESION, (20) (GO) BLOOD VESSEL MORPHOGENESIS, (21) (GO) CARDIOVASCULAR SYSTEM DEVELOPMENT, (22) (GO) CELL ACTIVATION, (23) (GO) CELL MOTILITY, (24) (GO) CHROMOSOME, (25) (GO) CIRCULATORY SYSTEM DEVELOPMENT, (26) (GO) COLLAGEN CONTAINING EXTRACELLULAR MATRIX, (27) (GO) CYTOKINE MEDIATED SIGNALING PATHWAY, (28) (GO) CYTOKINE PRODUCTION, (29) (GO) DEFENSE RESPONSE, (30) (GO) EMBRYO DEVELOPMENT, (31) (GO) EXTRACELLULAR STRUCTURE ORGANIZATION, (32) (GO) IMMUNE SYSTEM DEVELOPMENT, (33) (GO) INFLAMMATORY RESPONSE, (34) (GO) LEUKOCYTE CELL CELL ADHESION, (35) (GO) LOCOMOTION, (36) (GO) LYMPHOCYTE ACTIVATION, (37) (GO) NEGATIVE REGULATION OF BIOSYNTHETIC PROCESS, (38) (GO) NEGATIVE REGULATION OF IMMUNE SYSTEM PROCESS, (39) (GO) NEGATIVE REGULATION OF NUCLEOBASE CONTAINING COMPOUND METABOLIC PROCESS, (40) (GO) NUCLEAR CHROMOSOME, (41) (GO) POSITIVE REGULATION OF CELLULAR BIOSYNTHETIC PROCESS, (42) (GO) POSITIVE REGULATION OF DEVELOPMENTAL PROCESS, (43) (GO) POSITIVE REGULATION OF IMMUNE SYSTEM PROCESS, (44) (GO) POSITIVE REGULATION OF NUCLEOBASE CONTAINING COMPOUND METABOLIC PROCESS, (45) (GO) POSITIVE REGULATION OF RNA METABOLIC PROCESS, (46) (GO) REGULATION OF CELL ACTIVATION, (47) (GO) REGULATION OF CELL ADHESION, (48) (GO) REGULATION OF CELL POPULATION PROLIFERATION, (49) (GO) REGULATION OF IMMUNE SYSTEM PROCESS, (50) (GO) REGULATION OF



LYMPHOCYTE ACTIVATION, (51) (GO)  
REGULATION OF VASCULATURE  
DEVELOPMENT, (52) (GO) RESPONSE TO  
BIOTIC STIMULUS, (53) (GO) SKELETAL  
SYSTEM DEVELOPMENT, (54) (GO) TUBE  
DEVELOPMENT, (55) (GO) TUBE  
MORPHOGENESIS, (56) (GO) T CELL  
ACTIVATION, (57) (GO) POSITIVE  
REGULATION OF CELL ACTIVATION,  
(58) (GO) RESPONSE TO CYTOKINE, (59)  
(GO) REGULATION OF T CELL  
ACTIVATION, (60) (GO) T CELL  
PROLIFERATION, (61) (GO) EMBRYO  
DEVELOPMENT ENDING IN BIRTH OR  
EGG HATCHING, (62) (GO) DEFENSE  
RESPONSE TO OTHER ORGANISM, (63)  
(GO) REGULATION OF IMMUNE  
RESPONSE, (64) (GO) REGULATION OF  
IMMUNE EFFECTOR PROCESS, (65) (GO)  
POSITIVE REGULATION OF  
INTRACELLULAR SIGNAL  
TRANSDUCTION, (66) (GO) NEGATIVE  
REGULATION OF CELL ACTIVATION,  
(67) (GO) MYELOID CELL  
DIFFERENTIATION, (68) (GO) ADAPTIVE  
IMMUNE RESPONSE BASED ON  
SOMATIC RECOMBINATION OF  
IMMUNE RECEPTORS BUILT FROM  
IMMUNOGLOBULIN SUPERFAMILY  
DOMAINS, (69) (GO) REGULATION OF  
CELLULAR COMPONENT MOVEMENT,  
(70) (GO) NEGATIVE REGULATION OF  
LYMPHOCYTE ACTIVATION, (71) (GO)  
POSITIVE REGULATION OF  
LOCOMOTION, (72) (GO) CELL  
SUBSTRATE ADHESION, (73) (GO)  
INNATE IMMUNE RESPONSE, (74) (GO)  
POSITIVE REGULATION OF IMMUNE  
RESPONSE, (75) (GO) COLLAGEN  
METABOLIC PROCESS, (76) (GO)  
POSITIVE REGULATION OF CYTOKINE  
PRODUCTION, (77) (GO) IMMUNE  
EFFECTOR PROCESS, (78) (GO)  
REGULATION OF LEUKOCYTE  
MEDIATED IMMUNITY, (79) (GO)  
REGULATION OF RESPONSE TO  
EXTERNAL STIMULUS, (80) (GO)  
ANCHORING JUNCTION, (81) (GO)  
LYMPHOCYTE ACTIVATION INVOLVED  
IN IMMUNE RESPONSE, (82) (GO)  
NEGATIVE REGULATION OF CELL  
ADHESION, (83) (GO) I KAPPAB KINASE  
NF KAPPAB SIGNALING, (84) (GO)  
PHA(GO)CYTOSIS, (85) (GO)  
CHROMATIN BINDING, (86) (GO)  
INTEGRIN MEDIATED SIGNALING  
PATHWAY, (87) (GO) REGULATION OF  
ADAPTIVE IMMUNE RESPONSE, (88)  
(GO) ACTIVATION OF IMMUNE  
RESPONSE, (89) (GO) REGULATION OF  
DEFENSE RESPONSE, (90) (GO)  
TRANSCRIPTION FACTOR BINDING, (91)  
(GO) REGULATION OF RESPONSE TO



|         |                                                                                                                                                                                                                                                                                                                                                                                                                                                                                                                                                                                                                                                                                                                                                                                                                                                                                                                                                                                                                                                                                                                                                                                                                                                                                                                                                                                                                                                                    |                                                                                                                                                                                                                                                                                                                                                                                                                                                                                                                                                                                                                                                                                                                                                                                                                                                                                                                                                                                                                                                                                                                                                                                                                                                                                                                                                                   |
|---------|--------------------------------------------------------------------------------------------------------------------------------------------------------------------------------------------------------------------------------------------------------------------------------------------------------------------------------------------------------------------------------------------------------------------------------------------------------------------------------------------------------------------------------------------------------------------------------------------------------------------------------------------------------------------------------------------------------------------------------------------------------------------------------------------------------------------------------------------------------------------------------------------------------------------------------------------------------------------------------------------------------------------------------------------------------------------------------------------------------------------------------------------------------------------------------------------------------------------------------------------------------------------------------------------------------------------------------------------------------------------------------------------------------------------------------------------------------------------|-------------------------------------------------------------------------------------------------------------------------------------------------------------------------------------------------------------------------------------------------------------------------------------------------------------------------------------------------------------------------------------------------------------------------------------------------------------------------------------------------------------------------------------------------------------------------------------------------------------------------------------------------------------------------------------------------------------------------------------------------------------------------------------------------------------------------------------------------------------------------------------------------------------------------------------------------------------------------------------------------------------------------------------------------------------------------------------------------------------------------------------------------------------------------------------------------------------------------------------------------------------------------------------------------------------------------------------------------------------------|
|         | <p> CYTOKINE STIMULUS, (92) (GO) CELL<br/> SUBSTRATE JUNCTION, (93) (GO)<br/> MYELOID LEUKOCYTE ACTIVATION,<br/> (94) (GO) CELL ACTIVATION INVOLVED<br/> IN IMMUNE RESPONSE, (95) (GO)<br/> LEUKOCYTE MEDIATED IMMUNITY, (96)<br/> (GO) IN UTERO EMBRYONIC<br/> DEVELOPMENT, (97) (GO) REGULATION<br/> OF INTRACELLULAR SIGNAL<br/> TRANSDUCTION, (98) (GO) NEGATIVE<br/> REGULATION OF MULTI ORGANISM<br/> PROCESS, (99) (GO) TRANSCRIPTION<br/> COREGULATOR ACTIVITY, (100) (GO)<br/> REGULATION OF RESPONSE TO STRESS,<br/> (101) (GO) NUCLEAR SPECK, (102) (GO)<br/> CHROMOSOME ORGANIZATION, (103)<br/> (GO) INTERSPECIES INTERACTION<br/> BETWEEN ORGANISMS, (104) (GO)<br/> NUCLEAR BODY, (105) (GO) CHROMATIN<br/> ORGANIZATION, (106) (GO) COVALENT<br/> CHROMATIN MODIFICATION, (107) (GO)<br/> REGULATION OF GENE EXPRESSION<br/> EPIGENETIC </p>                                                                                                                                                                                                                                                                                                                                                                                                                                                                                                                                                                                                       |                                                                                                                                                                                                                                                                                                                                                                                                                                                                                                                                                                                                                                                                                                                                                                                                                                                                                                                                                                                                                                                                                                                                                                                                                                                                                                                                                                   |
| Down_PD | <p> (1) (H)K MTORC1 SIGNALING, (2) (K)<br/> PROTEASOME, (3) (R) APC C CDH1<br/> MEDIATED DEGRADATION OF CDC20<br/> AND OTHER APC C CDH1 TARGETED<br/> PROTEINS IN LATE MITOSIS EARLY G1,<br/> (4) (R) ASSEMBLY OF THE PRE<br/> REPLICATIVE COMPLEX, (5) (R) AUF1<br/> HNRNP D0 BINDS AND DESTABILIZES<br/> MRNA, (6) (R) CELL CYCLE<br/> CHECKPOINTS, (7) (R) CROSS<br/> PRESENTATION OF SOLUBLE<br/> EXOGENOUS ANTIGENS ENDOSOMES,<br/> (8) (R) DEFECTIVE CFTR CAUSES CYSTIC<br/> FIBROSIS, (9) (R) DEGRADATION OF<br/> DVL, (10) (R) DEGRADATION OF GLI1 BY<br/> THE PROTEASOME, (11) (R) DNA<br/> REPLICATION, (12) (R) HEDGEHOG<br/> LIGAND BIOGENESIS, (13) (R) HIV<br/> INFECTION, (14) (R) HOST<br/> INTERACTIONS OF HIV FACTORS, (15)<br/> (R) MITOCHONDRIAL TRANSLATION,<br/> (16) (R) MITOTIC G2 G2 M PHASES, (17)<br/> (R) MITOTIC METAPHASE AND<br/> ANAPHASE, (18) (R) NEGATIVE<br/> REGULATION OF NOTCH4 SIGNALING,<br/> (19) (R) ORC1 REMOVAL FROM<br/> CHROMATIN, (20) (R) REGULATION OF<br/> PTEN STABILITY AND ACTIVITY, (21) (R)<br/> REGULATION OF RAS BY GAPS, (22) (R)<br/> REGULATION OF RUNX2 EXPRESSION<br/> AND ACTIVITY, (23) (R) SEPARATION OF<br/> SISTER CHROMATIDS, (24) (R)<br/> SWITCHING OF ORIGINS TO A POST<br/> REPLICATIVE STATE, (25) (R)<br/> DEGRADATION OF AXIN, (26) (R)<br/> METABOLISM OF POLYAMINES, (27) (R)<br/> THE ROLE OF GTSE1 IN G2 M<br/> PROGRESSION AFTER G2 CHECKPOINT,<br/> (28) (R) APC C MEDIATED </p> | <p> (1) (H)K OXIDATIVE<br/> PHOSPHORYLATION, (2) (H)K FATTY<br/> ACID METABOLISM, (3) (H)K<br/> ADIPOGENESIS, (4) (K) OXIDATIVE<br/> PHOSPHORYLATION, (5) (K)<br/> PARKINSONS DISEASE, (6) (R)<br/> RESPIRATORY ELECTRON TRANSPORT<br/> ATP SYNTHESIS BY CHEMIOSMOTIC<br/> COUPLING AND HEAT PRODUCTION BY<br/> UNCOUPLING PROTEINS, (7) (R) THE<br/> CITRIC ACID TCA CYCLE AND<br/> RESPIRATORY ELECTRON TRANSPORT,<br/> (8) (R) NEURONAL SYSTEM, (9) (R)<br/> PYRUVATE METABOLISM AND CITRIC<br/> ACID TCA CYCLE, (10) (GO) ATP<br/> SYNTHESIS COUPLED ELECTRON<br/> TRANSPORT, (11) (GO) ENERGY<br/> DERIVATION BY OXIDATION OF<br/> ORGANIC COMPOUNDS, (12) (GO)<br/> NADH DEHYDROGENASE COMPLEX,<br/> (13) (GO) OXIDATIVE<br/> PHOSPHORYLATION, (14) (GO)<br/> RESPIRASOME, (15) (GO) RESPIRATORY<br/> CHAIN COMPLEX, (16) (GO)<br/> OXIDOREDUCTASE ACTIVITY ACTING<br/> ON NAD P H QUINONE OR SIMILAR<br/> COMPOUND AS ACCEPTOR, (17) (GO)<br/> OXIDATION REDUCTION PROCESS, (18)<br/> (GO) MONOVALENT INORGANIC<br/> CATION TRANSPORT, (19) (GO) SMALL<br/> MOLECULE METABOLIC PROCESS, (20)<br/> (GO) MONOVALENT INORGANIC<br/> CATION TRANSMEMBRANE<br/> TRANSPORTER ACTIVITY, (21) (GO)<br/> CATION TRANSMEMBRANE<br/> TRANSPORT, (22) (GO)<br/> OXIDOREDUCTASE ACTIVITY, (23) (GO)<br/> TRANSMEMBRANE TRANSPORT, (24)<br/> (GO) ION TRANSMEMBRANE </p> |

|  |                                                                                                                                                                                                                                                                                                                                                                                                                                                                                                                                                                                                                                                                                                                                                                                                                                                                                                                                                                                                                                                                                                                                                                                                                                                                                                                                                                                                                                                                                                                                                                                                                                                                                                                                                                                                                                                                                                                                                                                              |                                                                                                                                                                                                                                                                                                                                                                                                                                                                                              |
|--|----------------------------------------------------------------------------------------------------------------------------------------------------------------------------------------------------------------------------------------------------------------------------------------------------------------------------------------------------------------------------------------------------------------------------------------------------------------------------------------------------------------------------------------------------------------------------------------------------------------------------------------------------------------------------------------------------------------------------------------------------------------------------------------------------------------------------------------------------------------------------------------------------------------------------------------------------------------------------------------------------------------------------------------------------------------------------------------------------------------------------------------------------------------------------------------------------------------------------------------------------------------------------------------------------------------------------------------------------------------------------------------------------------------------------------------------------------------------------------------------------------------------------------------------------------------------------------------------------------------------------------------------------------------------------------------------------------------------------------------------------------------------------------------------------------------------------------------------------------------------------------------------------------------------------------------------------------------------------------------------|----------------------------------------------------------------------------------------------------------------------------------------------------------------------------------------------------------------------------------------------------------------------------------------------------------------------------------------------------------------------------------------------------------------------------------------------------------------------------------------------|
|  | <p>           DEGRADATION OF CELL CYCLE PROTEINS, (29) (R) CELLULAR RESPONSE TO HYPOXIA, (30) (R) DNA REPLICATION PRE INITIATION, (31) (R) STABILIZATION OF P53, (32) (R) SCF SKP2 MEDIATED DEGRADATION OF P27 P21, (33) (R) REGULATION OF RUNX3 EXPRESSION AND ACTIVITY, (34) (R) G2 M CHECKPOINTS, (35) (R) ASYMMETRIC LOCALIZATION OF PCP PROTEINS, (36) (R) DECTIN 1 MEDIATED NONCANONICAL NF KB SIGNALING, (37) (R) REGULATION OF MRNA STABILITY BY PROTEINS THAT BIND AU RICH ELEMENTS, (38) (R) ABC TRANSPORTER DISORDERS, (39) (R) HEDGEHOG OFF STATE, (40) (R) FCER1 MEDIATED NF KB ACTIVATION, (41) (R) CYCLIN A CDK2 ASSOCIATED EVENTS AT S PHASE ENTRY, (42) (R) DOWNSTREAM SIGNALING EVENTS OF B CELL RECEPTOR BCR, (43) (R) G1 S DNA DAMAGE CHECKPOINTS, (44) (R) PCP CE PATHWAY, (45) (R) M PHASE, (46) (R) UCH PROTEINASES, (47) (R) MAPK6 MAPK4 SIGNALING, (48) (R) HEDGEHOG ON STATE, (49) (R) SIGNALING BY NOTCH4, (50) (R) DEGRADATION OF BETA CATENIN BY THE DESTRUCTION COMPLEX, (51) (R) NERVOUS SYSTEM DEVELOPMENT, (52) (R) TNFR2 NON CANONICAL NF KB PATHWAY, (53) (R) BETA CATENIN INDEPENDENT WNT SIGNALING, (54) (GO) ANAPHASE PROMOTING COMPLEX DEPENDENT CATABOLIC PROCESS, (55) (GO) CELLULAR PROTEIN CONTAINING COMPLEX ASSEMBLY, (56) (GO) ENDOPEPTIDASE COMPLEX, (57) (GO) HYDROLASE ACTIVITY ACTING ON ACID ANHYDRIDES, (58) (GO) INTRACELLULAR TRANSPORT, (59) (GO) MITOCHONDRIAL GENE EXPRESSION, (60) (GO) MITOCHONDRIAL TRANSLATION, (61) (GO) MITOCHONDRIAL TRANSLATIONAL TERMINATION, (62) (GO) ORGANELAR RIBOSOME, (63) (GO) PEPTIDASE COMPLEX, (64) (GO) PROTEIN CONTAINING COMPLEX ASSEMBLY, (65) (GO) TRANSLATIONAL TERMINATION, (66) (GO) REGULATION OF CELLULAR AMINO ACID METABOLIC PROCESS, (67) (GO) CELL CYCLE G2 M PHASE TRANSITION, (68) (GO) REGULATION OF CELLULAR AMINE METABOLIC PROCESS, (69) (GO) ORGANELLE LOCALIZATION, (70) (GO) PROTEASOME ACCESSORY COMPLEX, (71) (GO) ESTABLISHMENT OF ORGANELLE LOCALIZATION         </p> | <p>           TRANSPORT, (25) (GO) COFACTOR METABOLIC PROCESS, (26) (GO) ORGANIC ACID METABOLIC PROCESS, (27) (GO) CATION CHANNEL COMPLEX, (28) (GO) CATION TRANSMEMBRANE TRANSPORTER ACTIVITY, (29) (GO) REGULATION OF MEMBRANE POTENTIAL, (30) (GO) ION TRANSMEMBRANE TRANSPORTER ACTIVITY, (31) (GO) CATION TRANSPORT, (32) (GO) COFACTOR BINDING, (33) (GO) TRANSPORTER COMPLEX, (34) (GO) TRANSPORTER ACTIVITY, (35) (GO) ION TRANSPORT, (36) (GO) CATION CHANNEL ACTIVITY         </p> |
|--|----------------------------------------------------------------------------------------------------------------------------------------------------------------------------------------------------------------------------------------------------------------------------------------------------------------------------------------------------------------------------------------------------------------------------------------------------------------------------------------------------------------------------------------------------------------------------------------------------------------------------------------------------------------------------------------------------------------------------------------------------------------------------------------------------------------------------------------------------------------------------------------------------------------------------------------------------------------------------------------------------------------------------------------------------------------------------------------------------------------------------------------------------------------------------------------------------------------------------------------------------------------------------------------------------------------------------------------------------------------------------------------------------------------------------------------------------------------------------------------------------------------------------------------------------------------------------------------------------------------------------------------------------------------------------------------------------------------------------------------------------------------------------------------------------------------------------------------------------------------------------------------------------------------------------------------------------------------------------------------------|----------------------------------------------------------------------------------------------------------------------------------------------------------------------------------------------------------------------------------------------------------------------------------------------------------------------------------------------------------------------------------------------------------------------------------------------------------------------------------------------|

**Table S18.** Jointly deregulated pathways in PD and THCA.

|       | Up_THCA                                                                                                                                                                                                                                                                                                                                                                                                                                                                                                                                                                                                                                                                                                                                                                                                                                                                                                                                                                                                                                                                                                                                                                                                                                                                                                                                                                                                                                                                                                                                                                                                                                                                                                                                                                                                                                                           | Down_THCA                                                                                                                                                                                                                                           |
|-------|-------------------------------------------------------------------------------------------------------------------------------------------------------------------------------------------------------------------------------------------------------------------------------------------------------------------------------------------------------------------------------------------------------------------------------------------------------------------------------------------------------------------------------------------------------------------------------------------------------------------------------------------------------------------------------------------------------------------------------------------------------------------------------------------------------------------------------------------------------------------------------------------------------------------------------------------------------------------------------------------------------------------------------------------------------------------------------------------------------------------------------------------------------------------------------------------------------------------------------------------------------------------------------------------------------------------------------------------------------------------------------------------------------------------------------------------------------------------------------------------------------------------------------------------------------------------------------------------------------------------------------------------------------------------------------------------------------------------------------------------------------------------------------------------------------------------------------------------------------------------|-----------------------------------------------------------------------------------------------------------------------------------------------------------------------------------------------------------------------------------------------------|
| Up_PD | <p>(1) (H)K INFLAMMATORY RESPONSE, (2) (H)K IL6 JAK STAT3 SIGNALING, (3) (H)K TNFA SIGNALING VIA NFKB, (4) (H)K IL2 STAT5 SIGNALING, (5) (H)K INTERFERON GAMMA RESPONSE, (6) (H)K P53 PATHWAY, (7) (H)K INTERFERON ALPHA RESPONSE, (8) (K) CYTOKINE CYTOKINE RECEPTOR INTERACTION, (9) (R) EXTRACELLULAR MATRIX ORGANIZATION, (10) (R) COLLAGEN FORMATION, (11) (R) INTEGRIN CELL SURFACE INTERACTIONS, (12) (R) COLLAGEN BIOSYNTHESIS AND MODIFYING ENZYMES, (13) (GO) ADAPTIVE IMMUNE RESPONSE, (14) (GO) ANATOMICAL STRUCTURE FORMATION INVOLVED IN MORPHOGENESIS, (15) (GO) BIOLOGICAL ADHESION, (16) (GO) BLOOD VESSEL MORPHOGENESIS, (17) (GO) CARDIOVASCULAR SYSTEM DEVELOPMENT, (18) (GO) CELL ACTIVATION, (19) (GO) CELL CELL ADHESION, (20) (GO) CELL MOTILITY, (21) (GO) CIRCULATORY SYSTEM DEVELOPMENT, (22) (GO) COLLAGEN CONTAINING EXTRACELLULAR MATRIX, (23) (GO) CYTOKINE MEDIATED SIGNALING PATHWAY, (24) (GO) CYTOKINE PRODUCTION, (25) (GO) DEFENSE RESPONSE, (26) (GO) EMBRYO DEVELOPMENT, (27) (GO) EXTRACELLULAR STRUCTURE ORGANIZATION, (28) (GO) INFLAMMATORY RESPONSE, (29) (GO) LOCOMOTION, (30) (GO) NEGATIVE REGULATION OF MULTICELLULAR ORGANISMAL PROCESS, (31) (GO) POSITIVE REGULATION OF DEVELOPMENTAL PROCESS, (32) (GO) POSITIVE REGULATION OF IMMUNE SYSTEM PROCESS, (33) (GO) REGULATION OF CELL ACTIVATION, (34) (GO) REGULATION OF CELL ADHESION, (35) (GO) REGULATION OF CELL POPULATION PROLIFERATION, (36) (GO) REGULATION OF IMMUNE SYSTEM PROCESS, (37) (GO) REGULATION OF VASCULATURE DEVELOPMENT, (38) (GO) RESPONSE TO BACTERIUM, (39) (GO) RESPONSE TO BIOTIC STIMULUS, (40) (GO) TUBE DEVELOPMENT, (41) (GO) TUBE MORPHOGENESIS, (42) (GO) RESPONSE TO CYTOKINE, (43) (GO) EMBRYO DEVELOPMENT ENDING IN BIRTH OR EGG HATCHING, (44) (GO) DEFENSE RESPONSE TO OTHER ORGANISM, (45) (GO) REGULATION OF IMMUNE</p> | <p>(1) (R) RNA POLYMERASE II TRANSCRIPTION, (2) (R) RESPONSE OF EIF2AK4 GCN2 TO AMINO ACID DEFICIENCY, (3) (R) EUKARYOTIC TRANSLATION ELONGATION, (4) (GO) DNA BINDING TRANSCRIPTION FACTOR ACTIVITY, (5) (GO) TRANSCRIPTION REGULATOR ACTIVITY</p> |

|         |                                                                                                                                                                                                                                                                                                                                                                                                                                                                                                                                                                                                                                                                                                                                                                                                                                                                                                                                                                                                                                                                                                                                                                                                                                                                                                                                                                                                                                                                                                                                                                                                                                                                                                                                                                                                                                                                                                                                                                                     |                                                                                                                                                                                                                                                                                                                                                                                                                                                                                                                                                                                                                                                                                                                                                                                                                                                                                                                                                                                                                                        |
|---------|-------------------------------------------------------------------------------------------------------------------------------------------------------------------------------------------------------------------------------------------------------------------------------------------------------------------------------------------------------------------------------------------------------------------------------------------------------------------------------------------------------------------------------------------------------------------------------------------------------------------------------------------------------------------------------------------------------------------------------------------------------------------------------------------------------------------------------------------------------------------------------------------------------------------------------------------------------------------------------------------------------------------------------------------------------------------------------------------------------------------------------------------------------------------------------------------------------------------------------------------------------------------------------------------------------------------------------------------------------------------------------------------------------------------------------------------------------------------------------------------------------------------------------------------------------------------------------------------------------------------------------------------------------------------------------------------------------------------------------------------------------------------------------------------------------------------------------------------------------------------------------------------------------------------------------------------------------------------------------------|----------------------------------------------------------------------------------------------------------------------------------------------------------------------------------------------------------------------------------------------------------------------------------------------------------------------------------------------------------------------------------------------------------------------------------------------------------------------------------------------------------------------------------------------------------------------------------------------------------------------------------------------------------------------------------------------------------------------------------------------------------------------------------------------------------------------------------------------------------------------------------------------------------------------------------------------------------------------------------------------------------------------------------------|
|         | <p>             RESPONSE, (46) (GO) POSITIVE<br/>             REGULATION OF INTRACELLULAR<br/>             SIGNAL TRANSDUCTION, (47) (GO)<br/>             TISSUE REMODELING, (48) (GO)<br/>             REGULATION OF CELLULAR<br/>             COMPONENT MOVEMENT, (49) (GO)<br/>             POSITIVE REGULATION OF<br/>             LOCOMOTION, (50) (GO) CELL<br/>             SUBSTRATE ADHESION, (51) (GO)<br/>             INNATE IMMUNE RESPONSE, (52) (GO)<br/>             POSITIVE REGULATION OF IMMUNE<br/>             RESPONSE, (53) (GO) COLLAGEN<br/>             METABOLIC PROCESS, (54) (GO)<br/>             POSITIVE REGULATION OF CYTOKINE<br/>             PRODUCTION, (55) (GO) IMMUNE<br/>             EFFECTOR PROCESS, (56) (GO)<br/>             REGULATION OF RESPONSE TO<br/>             EXTERNAL STIMULUS, (57) (GO)<br/>             ANCHORING JUNCTION, (58) (GO) I<br/>             KAPPAB KINASE NF KAPPAB<br/>             SIGNALING, (59) (GO) PHA(GO)CYTOSIS,<br/>             (60) (GO) INTEGRIN MEDIATED<br/>             SIGNALING PATHWAY, (61) (GO)<br/>             ACTIVATION OF IMMUNE RESPONSE,<br/>             (62) (GO) REGULATION OF DEFENSE<br/>             RESPONSE, (63) (GO) CELL JUNCTION<br/>             ORGANIZATION, (64) (GO) CELL<br/>             SUBSTRATE JUNCTION, (65) (GO)<br/>             POSITIVE REGULATION OF I KAPPAB<br/>             KINASE NF KAPPAB SIGNALING, (66)<br/>             (GO) MYELOID LEUKOCYTE<br/>             ACTIVATION, (67) (GO) CELL<br/>             ACTIVATION INVOLVED IN IMMUNE<br/>             RESPONSE, (68) (GO) ENTRY INTO HOST,<br/>             (69) (GO) LEUKOCYTE MEDIATED<br/>             IMMUNITY, (70) (GO) CELL JUNCTION<br/>             ASSEMBLY, (71) (GO) REGULATION OF<br/>             INTRACELLULAR SIGNAL<br/>             TRANSDUCTION, (72) (GO)<br/>             REGULATION OF RESPONSE TO STRESS,<br/>             (73) (GO) RUFFLE           </p> |                                                                                                                                                                                                                                                                                                                                                                                                                                                                                                                                                                                                                                                                                                                                                                                                                                                                                                                                                                                                                                        |
| Down_PD | <p>             (1) (H)K MTORC1 SIGNALING, (2) (R)<br/>             CELL CYCLE CHECKPOINTS, (3) (R) G2 M<br/>             CHECKPOINTS, (4) (R) M PHASE, (5) (R)<br/>             MHC CLASS II ANTIGEN<br/>             PRESENTATION, (6) (R) NERVOUS<br/>             SYSTEM DEVELOPMENT, (7) (GO)<br/>             GLUTAMATERGIC SYNAPSE, (8) (GO)<br/>             NEURON PROJECTION, (9) (GO)<br/>             POSTSYNAPSE, (10) (GO)<br/>             SOMATODENDRITIC COMPARTMENT,<br/>             (11) (GO) SYNAPSE, (12) (GO) SYNAPTIC<br/>             MEMBRANE, (13) (GO) SYNAPTIC<br/>             SIGNALING, (14) (GO) DENDRITIC TREE,<br/>             (15) (GO) REGULATION OF TRANS<br/>             SYNAPTIC SIGNALING, (16) (GO)<br/>             SYNAPSE ORGANIZATION, (17) (GO)<br/>             REGULATION OF SYNAPSE STRUCTURE<br/>             OR ACTIVITY, (18) (GO) NEURON<br/>             DEVELOPMENT, (19) (GO) CELL PART<br/>             MORPHOGENESIS, (20) (GO) CELL<br/>             MORPHOGENESIS INVOLVED IN           </p>                                                                                                                                                                                                                                                                                                                                                                                                                                                                                                                                                                                                                                                                                                                                                                                                                                                                                                                         | <p>             (1) (H)K OXIDATIVE<br/>             PHOSPHORYLATION, (2) (H)K<br/>             ADIPOGENESIS, (3) (K) HUNTINGTONS<br/>             DISEASE, (4) (K) OXIDATIVE<br/>             PHOSPHORYLATION, (5) (K)<br/>             PARKINSONS DISEASE, (6) (R) COMPLEX<br/>             I BIOGENESIS, (7) (R) RESPIRATORY<br/>             ELECTRON TRANSPORT, (8) (R)<br/>             RESPIRATORY ELECTRON TRANSPORT<br/>             ATP SYNTHESIS BY CHEMIOSMOTIC<br/>             COUPLING AND HEAT PRODUCTION BY<br/>             UNCOUPLING PROTEINS, (9) (R) THE<br/>             CITRIC ACID TCA CYCLE AND<br/>             RESPIRATORY ELECTRON TRANSPORT,<br/>             (10) (R) PROTEIN LOCALIZATION, (11) (R)<br/>             CRISTAE FORMATION, (12) (R)<br/>             FORMATION OF ATP BY<br/>             CHEMIOSMOTIC COUPLING, (13) (GO)<br/>             ATP METABOLIC PROCESS, (14) (GO)<br/>             ATP SYNTHESIS COUPLED ELECTRON<br/>             TRANSPORT, (15) (GO) CELLULAR           </p> |

|  |                                                          |                                                                                                                                                                                                                                                                                                                                                                                                                                                                                                                                                                                                                                                                                                                                                                                                                                                                                                                                                                                                                                                                                                                                                                                                                                                                                                                                              |
|--|----------------------------------------------------------|----------------------------------------------------------------------------------------------------------------------------------------------------------------------------------------------------------------------------------------------------------------------------------------------------------------------------------------------------------------------------------------------------------------------------------------------------------------------------------------------------------------------------------------------------------------------------------------------------------------------------------------------------------------------------------------------------------------------------------------------------------------------------------------------------------------------------------------------------------------------------------------------------------------------------------------------------------------------------------------------------------------------------------------------------------------------------------------------------------------------------------------------------------------------------------------------------------------------------------------------------------------------------------------------------------------------------------------------|
|  | NEURON DIFFERENTIATION, (21) (GO)<br>CELL CELL SIGNALING | RESPIRATION, (16) (GO) ELECTRON<br>TRANSPORT CHAIN, (17) (GO) ENERGY<br>DERIVATION BY OXIDATION OF<br>ORGANIC COMPOUNDS, (18) (GO)<br>ENVELOPE, (19) (GO) GENERATION OF<br>PRECURSOR METABOLITES AND<br>ENERGY, (20) (GO) INNER<br>MITOCHONDRIAL MEMBRANE<br>PROTEIN COMPLEX, (21) (GO)<br>INTRACELLULAR TRANSPORT, (22) (GO)<br>MITOCHONDRIAL ELECTRON<br>TRANSPORT NADH TO UBIQUINONE,<br>(23) (GO) MITOCHONDRIAL ENVELOPE,<br>(24) (GO) MITOCHONDRIAL MATRIX,<br>(25) (GO) MITOCHONDRIAL PROTEIN<br>COMPLEX, (26) (GO) MITOCHONDRIAL<br>RESPIRATORY CHAIN COMPLEX<br>ASSEMBLY, (27) (GO) MITOCHONDRION,<br>(28) (GO) MITOCHONDRION<br>ORGANIZATION, (29) (GO) NADH<br>DEHYDROGENASE ACTIVITY, (30) (GO)<br>NADH DEHYDROGENASE COMPLEX,<br>(31) (GO) NADH DEHYDROGENASE<br>COMPLEX ASSEMBLY, (32) (GO)<br>ORGANELLE INNER MEMBRANE, (33)<br>(GO) OXIDATIVE PHOSPHORYLATION,<br>(34) (GO) RESPIRASOME, (35) (GO)<br>RESPIRATORY CHAIN COMPLEX, (36)<br>(GO) RESPIRATORY ELECTRON<br>TRANSPORT CHAIN, (37) (GO)<br>OXIDOREDUCTASE ACTIVITY ACTING<br>ON NAD P H QUINONE OR SIMILAR<br>COMPOUND AS ACCEPTOR, (38) (GO)<br>OXIDATION REDUCTION PROCESS, (39)<br>(GO) CRISTAE FORMATION, (40) (GO)<br>ATP SYNTHESIS COUPLED PROTON<br>TRANSPORT, (41) (GO) PROTON<br>TRANSPORTING ATP SYNTHASE<br>COMPLEX, (42) (GO) OXIDOREDUCTASE<br>ACTIVITY |
|--|----------------------------------------------------------|----------------------------------------------------------------------------------------------------------------------------------------------------------------------------------------------------------------------------------------------------------------------------------------------------------------------------------------------------------------------------------------------------------------------------------------------------------------------------------------------------------------------------------------------------------------------------------------------------------------------------------------------------------------------------------------------------------------------------------------------------------------------------------------------------------------------------------------------------------------------------------------------------------------------------------------------------------------------------------------------------------------------------------------------------------------------------------------------------------------------------------------------------------------------------------------------------------------------------------------------------------------------------------------------------------------------------------------------|

**Table S19.** Jointly deregulated pathways in PD and BRCA.

|       | Up_BRCA                                                                                                                                                                                                                                                                                                                                                                                                                                                                                                                                           | Down_BRCA                                                                                                                                                                                                                                                                                                                                                                                                                                                                                                                                                            |
|-------|---------------------------------------------------------------------------------------------------------------------------------------------------------------------------------------------------------------------------------------------------------------------------------------------------------------------------------------------------------------------------------------------------------------------------------------------------------------------------------------------------------------------------------------------------|----------------------------------------------------------------------------------------------------------------------------------------------------------------------------------------------------------------------------------------------------------------------------------------------------------------------------------------------------------------------------------------------------------------------------------------------------------------------------------------------------------------------------------------------------------------------|
| Up_PD | (1) (H)K INTERFERON GAMMA<br>RESPONSE, (2) (H)K INTERFERON ALPHA<br>RESPONSE, (3) (PID) E2F PATHWAY, (4)<br>(R) RNA POLYMERASE II<br>TRANSCRIPTION, (5) (R) CHROMATIN<br>MODIFYING ENZYMES, (6) (GO)<br>CHROMOSOME, (7) (GO) NUCLEAR<br>CHROMOSOME, (8) (GO) DEFENSE<br>RESPONSE TO OTHER ORGANISM, (9)<br>(GO) REGULATION OF IMMUNE<br>RESPONSE, (10) (GO) INNATE IMMUNE<br>RESPONSE, (11) (GO) IMMUNE EFFECTOR<br>PROCESS, (12) (GO) CHROMATIN<br>BINDING, (13) (GO) CHROMOSOME<br>ORGANIZATION, (14) (GO) CHROMATIN<br>ORGANIZATION, (15) (GO) | (1) (H)K TNFA SIGNALING VIA NFKB, (2)<br>(R) RESPONSE OF EIF2AK4 GCN2 TO<br>AMINO ACID DEFICIENCY, (3) (R)<br>EUKARYOTIC TRANSLATION<br>ELONGATION, (4) (GO) ANATOMICAL<br>STRUCTURE FORMATION INVOLVED IN<br>MORPHOGENESIS, (5) (GO) BIOLOGICAL<br>ADHESION, (6) (GO) BLOOD VESSEL<br>MORPHOGENESIS, (7) (GO)<br>CARDIOVASCULAR SYSTEM<br>DEVELOPMENT, (8) (GO) CELL<br>MOTILITY, (9) (GO) CIRCULATORY<br>SYSTEM DEVELOPMENT, (10) (GO)<br>COLLAGEN CONTAINING<br>EXTRACELLULAR MATRIX, (11) (GO)<br>DNA BINDING TRANSCRIPTION<br>ACTIVATOR ACTIVITY, (12) (GO) DNA |

|         |                                                                                                                                                                                                                                                                                                                                                                                                                                                                                                                                                                                                                                                                                                                                                                                                                                                                                                                                                                                                                                                                                                          |                                                                                                                                                                                                                                                                                                                                                                                                                                                                                                                                                                                                                                                                                                                                                                                                                                                                                                                                                                                                                                                                                                     |
|---------|----------------------------------------------------------------------------------------------------------------------------------------------------------------------------------------------------------------------------------------------------------------------------------------------------------------------------------------------------------------------------------------------------------------------------------------------------------------------------------------------------------------------------------------------------------------------------------------------------------------------------------------------------------------------------------------------------------------------------------------------------------------------------------------------------------------------------------------------------------------------------------------------------------------------------------------------------------------------------------------------------------------------------------------------------------------------------------------------------------|-----------------------------------------------------------------------------------------------------------------------------------------------------------------------------------------------------------------------------------------------------------------------------------------------------------------------------------------------------------------------------------------------------------------------------------------------------------------------------------------------------------------------------------------------------------------------------------------------------------------------------------------------------------------------------------------------------------------------------------------------------------------------------------------------------------------------------------------------------------------------------------------------------------------------------------------------------------------------------------------------------------------------------------------------------------------------------------------------------|
|         | REGULATION OF GENE EXPRESSION<br>EPIGENETIC                                                                                                                                                                                                                                                                                                                                                                                                                                                                                                                                                                                                                                                                                                                                                                                                                                                                                                                                                                                                                                                              | BINDING TRANSCRIPTION FACTOR<br>ACTIVITY RNA POLYMERASE II<br>SPECIFIC, (13) (GO) LOCOMOTION, (14)<br>(GO) NEGATIVE REGULATION OF<br>MULTICELLULAR ORGANISMAL<br>PROCESS, (15) (GO) POSITIVE<br>REGULATION OF DEVELOPMENTAL<br>PROCESS, (16) (GO) POSITIVE<br>REGULATION OF TRANSCRIPTION BY<br>RNA POLYMERASE II, (17) (GO) POSITIVE<br>REGULATION OF VASCULATURE<br>DEVELOPMENT, (18) (GO) REGULATION<br>OF CELL POPULATION PROLIFERATION,<br>(19) (GO) REGULATION OF<br>VASCULATURE DEVELOPMENT, (20)<br>(GO) TUBE DEVELOPMENT, (21) (GO)<br>TUBE MORPHOGENESIS, (22) (GO)<br>MUSCLE STRUCTURE DEVELOPMENT,<br>(23) (GO) REGULATION OF CELLULAR<br>COMPONENT MOVEMENT, (24) (GO)<br>POSITIVE REGULATION OF<br>LOCOMOTION, (25) (GO) CELL<br>SUBSTRATE ADHESION, (26) (GO)<br>ENDOTHELIUM DEVELOPMENT, (27)<br>(GO) ANCHORING JUNCTION, (28) (GO)<br>NEGATIVE REGULATION OF CELL<br>POPULATION PROLIFERATION, (29) (GO)<br>CELL JUNCTION ORGANIZATION, (30)<br>(GO) CELL SUBSTRATE JUNCTION, (31)<br>(GO) CELL JUNCTION ASSEMBLY, (32)<br>(GO) REGULATION OF INTRACELLULAR<br>SIGNAL TRANSDUCTION |
| Down_PD | (1) (H)K MTORC1 SIGNALING, (2) (K)<br>PROTEASOME, (3) (R) APC C CDH1<br>MEDIATED DEGRADATION OF CDC20<br>AND OTHER APC C CDH1 TARGETED<br>PROTEINS IN LATE MITOSIS EARLY G1,<br>(4) (R) ASPARAGINE N LINKED<br>GLYCOSYLATION, (5) (R) ASSEMBLY OF<br>THE PRE REPLICATIVE COMPLEX, (6) (R)<br>CELL CYCLE CHECKPOINTS, (7) (R) DNA<br>REPLICATION, (8) (R) HIV INFECTION, (9)<br>(R) HOST INTERACTIONS OF HIV<br>FACTORS, (10) (R) MITOCHONDRIAL<br>TRANSLATION, (11) (R) MITOTIC G2 G2<br>M PHASES, (12) (R) MITOTIC<br>METAPHASE AND ANAPHASE, (13) (R)<br>ORC1 REMOVAL FROM CHROMATIN,<br>(14) (R) SEPARATION OF SISTER<br>CHROMATIDS, (15) (R) SWITCHING OF<br>ORIGINS TO A POST REPLICATIVE<br>STATE, (16) (R) METABOLISM OF<br>POLYAMINES, (17) (R) THE ROLE OF<br>GTSE1 IN G2 M PROGRESSION AFTER G2<br>CHECKPOINT, (18) (R) APC C MEDIATED<br>DEGRADATION OF CELL CYCLE<br>PROTEINS, (19) (R) DNA REPLICATION<br>PRE INITIATION, (20) (R)<br>STABILIZATION OF P53, (21) (R) SCF SKP2<br>MEDIATED DEGRADATION OF P27 P21,<br>(22) (R) G2 M CHECKPOINTS, (23) (R)<br>CYCLIN A CDK2 ASSOCIATED EVENTS | (1) (H)K ADIPOGENESIS, (2) (GO)<br>SYNAPSE, (3) (GO) CELL CELL<br>SIGNALING                                                                                                                                                                                                                                                                                                                                                                                                                                                                                                                                                                                                                                                                                                                                                                                                                                                                                                                                                                                                                         |

|  |                                                                                                                                                                                                                                                                                                                                                                                                                                                                                                                                                                                                                                                                                                                                                                                                                                               |  |
|--|-----------------------------------------------------------------------------------------------------------------------------------------------------------------------------------------------------------------------------------------------------------------------------------------------------------------------------------------------------------------------------------------------------------------------------------------------------------------------------------------------------------------------------------------------------------------------------------------------------------------------------------------------------------------------------------------------------------------------------------------------------------------------------------------------------------------------------------------------|--|
|  | AT S PHASE ENTRY, (24) (R) G1 S DNA<br>DAMAGE CHECKPOINTS, (25) (R) M<br>PHASE, (26) (R) UCH PROTEINASES, (27)<br>(R) (GO) LIG TO ER RETROGRADE<br>TRANSPORT, (28) (R) MHC CLASS II<br>ANTIGEN PRESENTATION, (29) (R) COPI<br>DEPENDENT (GO) LIG TO ER<br>RETROGRADE TRAFFIC, (30) (R)<br>GLUCOSE METABOLISM, (31) (GO)<br>ANAPHASE PROMOTING COMPLEX<br>DEPENDENT CATABOLIC PROCESS, (32)<br>(GO) CELLULAR PROTEIN CONTAINING<br>COMPLEX ASSEMBLY, (33) (GO)<br>ENDOPEPTIDASE COMPLEX, (34) (GO)<br>HYDROLASE ACTIVITY ACTING ON<br>ACID ANHYDRIDES, (35) (GO)<br>MITOCHONDRIAL GENE EXPRESSION,<br>(36) (GO) MITOCHONDRIAL<br>TRANSLATION, (37) (GO) PROTEIN<br>CONTAINING COMPLEX ASSEMBLY, (38)<br>(GO) CELL CYCLE G2 M PHASE<br>TRANSITION, (39) (GO) ORGANELLE<br>LOCALIZATION, (40) (GO)<br>ESTABLISHMENT OF ORGANELLE<br>LOCALIZATION |  |
|--|-----------------------------------------------------------------------------------------------------------------------------------------------------------------------------------------------------------------------------------------------------------------------------------------------------------------------------------------------------------------------------------------------------------------------------------------------------------------------------------------------------------------------------------------------------------------------------------------------------------------------------------------------------------------------------------------------------------------------------------------------------------------------------------------------------------------------------------------------|--|

**Table S20.** Jointly deregulated pathways in PD and CLL.

|         | Up_CLL                                     | Down_CLL                                                                                                                                                                                                                                                                                               |
|---------|--------------------------------------------|--------------------------------------------------------------------------------------------------------------------------------------------------------------------------------------------------------------------------------------------------------------------------------------------------------|
| Up_PD   | (1) (R) RNA POLYMERASE II<br>TRANSCRIPTION | (1) (H)K INFLAMMATORY RESPONSE, (2)<br>(H)K TNFA SIGNALING VIA NFKB, (3)<br>(GO) BIOLOGICAL ADHESION, (4) (GO)<br>CELL ACTIVATION, (5) (GO) CELL<br>MOTILITY, (6) (GO) EPITHELIAL CELL<br>DIFFERENTIATION, (7) (GO)<br>LOCOMOTION, (8) (GO) LYMPHOCYTE<br>ACTIVATION, (9) (GO) RESPONSE TO<br>CYTOKINE |
| Down_PD | (1) , (0)                                  | (1) (H)K MTORC1 SIGNALING                                                                                                                                                                                                                                                                              |

**Table S21.** Jointly deregulated pathways in PD and LGCA.

|       | Up_LGCA                                                  | Down_LGCA                                                                                                                                                                                                                                                                                                                                                                                                                                                                                               |
|-------|----------------------------------------------------------|---------------------------------------------------------------------------------------------------------------------------------------------------------------------------------------------------------------------------------------------------------------------------------------------------------------------------------------------------------------------------------------------------------------------------------------------------------------------------------------------------------|
| Up_PD | (1) (GO) CHROMOSOME, (2) (GO)<br>CHROMOSOME ORGANIZATION | (1) (H)K INFLAMMATORY RESPONSE, (2)<br>(H)K TNFA SIGNALING VIA NFKB, (3)<br>(H)K IL2 STAT5 SIGNALING, (4) (H)K<br>INTERFERON GAMMA RESPONSE, (5)<br>(H)K INTERFERON ALPHA RESPONSE, (6)<br>(K) CYTOKINE CYTOKINE RECEPTOR<br>INTERACTION, (7) (GO) ADAPTIVE<br>IMMUNE RESPONSE, (8) (GO)<br>ANATOMICAL STRUCTURE<br>FORMATION INVOLVED IN<br>MORPHOGENESIS, (9) (GO) BIOLOGICAL<br>ADHESION, (10) (GO) BLOOD VESSEL<br>MORPHOGENESIS, (11) (GO)<br>CARDIOVASCULAR SYSTEM<br>DEVELOPMENT, (12) (GO) CELL |



ACTIVATION, (13) (GO) CELL CELL  
ADHESION, (14) (GO) CELL MOTILITY,  
(15) (GO) CIRCULATORY SYSTEM  
DEVELOPMENT, (16) (GO) CYTOKINE  
MEDIATED SIGNALING PATHWAY, (17)  
(GO) CYTOKINE PRODUCTION, (18) (GO)  
DEFENSE RESPONSE, (19) (GO) IMMUNE  
RECEPTOR ACTIVITY, (20) (GO) IMMUNE  
SYSTEM DEVELOPMENT, (21) (GO)  
INFLAMMATORY RESPONSE, (22) (GO)  
LEUKOCYTE CELL CELL ADHESION, (23)  
(GO) LEUKOCYTE DIFFERENTIATION,  
(24) (GO) LOCOMOTION, (25) (GO)  
LYMPHOCYTE ACTIVATION, (26) (GO)  
NEGATIVE REGULATION OF IMMUNE  
SYSTEM PROCESS, (27) (GO) NEGATIVE  
REGULATION OF MULTICELLULAR  
ORGANISMAL PROCESS, (28) (GO)  
POSITIVE REGULATION OF  
DEVELOPMENTAL PROCESS, (29) (GO)  
POSITIVE REGULATION OF IMMUNE  
SYSTEM PROCESS, (30) (GO) POSITIVE  
REGULATION OF VASCULATURE  
DEVELOPMENT, (31) (GO) REGULATION  
OF CELL ACTIVATION, (32) (GO)  
REGULATION OF CELL ADHESION, (33)  
(GO) REGULATION OF CELL  
POPULATION PROLIFERATION, (34) (GO)  
REGULATION OF IMMUNE SYSTEM  
PROCESS, (35) (GO) REGULATION OF  
VASCULATURE DEVELOPMENT, (36)  
(GO) RESPONSE TO BACTERIUM, (37)  
(GO) RESPONSE TO BIOTIC STIMULUS,  
(38) (GO) RESPONSE TO MOLECULE OF  
BACTERIAL ORIGIN, (39) (GO) TUBE  
DEVELOPMENT, (40) (GO) TUBE  
MORPHOGENESIS, (41) (GO) T CELL  
ACTIVATION, (42) (GO) REGULATION OF  
LEUKOCYTE DIFFERENTIATION, (43)  
(GO) NEGATIVE REGULATION OF  
CYTOKINE PRODUCTION, (44) (GO)  
POSITIVE REGULATION OF CELL  
ACTIVATION, (45) (GO) RESPONSE TO  
CYTOKINE, (46) (GO) CYTOKINE  
BINDING, (47) (GO) MUSCLE  
STRUCTURE DEVELOPMENT, (48) (GO)  
DEFENSE RESPONSE TO OTHER  
ORGANISM, (49) (GO) REGULATION OF  
IMMUNE RESPONSE, (50) (GO)  
REGULATION OF IMMUNE EFFECTOR  
PROCESS, (51) (GO) POSITIVE  
REGULATION OF INTRACELLULAR  
SIGNAL TRANSDUCTION, (52) (GO)  
TUMOR NECROSIS FACTOR  
SUPERFAMILY CYTOKINE  
PRODUCTION, (53) (GO) NEGATIVE  
REGULATION OF CELL ACTIVATION,  
(54) (GO) CELLULAR RESPONSE TO  
BIOTIC STIMULUS, (55) (GO) MYELOID  
CELL DIFFERENTIATION, (56) (GO)  
ADAPTIVE IMMUNE RESPONSE BASED  
ON SOMATIC RECOMBINATION OF  
IMMUNE RECEPTORS BUILT FROM



|         |                                                                                                                                                                                                                                                                                                                                                                                                                                                                                                                                                                                                                                                                                                                                |                                                                                                                                                                                                                                                                                                                                                                                                                                                                                                                                                                                                                                                                                                                                                                                                                                                                                                                                                                                                                                                                                                                                                                                                                                                                                                                         |
|---------|--------------------------------------------------------------------------------------------------------------------------------------------------------------------------------------------------------------------------------------------------------------------------------------------------------------------------------------------------------------------------------------------------------------------------------------------------------------------------------------------------------------------------------------------------------------------------------------------------------------------------------------------------------------------------------------------------------------------------------|-------------------------------------------------------------------------------------------------------------------------------------------------------------------------------------------------------------------------------------------------------------------------------------------------------------------------------------------------------------------------------------------------------------------------------------------------------------------------------------------------------------------------------------------------------------------------------------------------------------------------------------------------------------------------------------------------------------------------------------------------------------------------------------------------------------------------------------------------------------------------------------------------------------------------------------------------------------------------------------------------------------------------------------------------------------------------------------------------------------------------------------------------------------------------------------------------------------------------------------------------------------------------------------------------------------------------|
|         |                                                                                                                                                                                                                                                                                                                                                                                                                                                                                                                                                                                                                                                                                                                                | <p>IMMUNOGLOBULIN SUPERFAMILY DOMAINS, (57) (GO) REGULATION OF CELLULAR COMPONENT MOVEMENT, (58) (GO) POSITIVE REGULATION OF LOCOMOTION, (59) (GO) CELL SUBSTRATE ADHESION, (60) (GO) INNATE IMMUNE RESPONSE, (61) (GO) POSITIVE REGULATION OF IMMUNE RESPONSE, (62) (GO) IMMUNE EFFECTOR PROCESS, (63) (GO) REGULATION OF LEUKOCYTE MEDIATED IMMUNITY, (64) (GO) REGULATION OF RESPONSE TO EXTERNAL STIMULUS, (65) (GO) POSITIVE REGULATION OF LEUKOCYTE DIFFERENTIATION, (66) (GO) ENDOTHELIUM DEVELOPMENT, (67) (GO) ANCHORING JUNCTION, (68) (GO) NEGATIVE REGULATION OF CELL POPULATION PROLIFERATION, (69) (GO) NEGATIVE REGULATION OF CELL ADHESION, (70) (GO) PHA(GO)CYTOSIS, (71) (GO) CELLULAR RESPONSE TO VASCULAR ENDOTHELIAL GROWTH FACTOR STIMULUS, (72) (GO) REGULATION OF ADAPTIVE IMMUNE RESPONSE, (73) (GO) ACTIVATION OF IMMUNE RESPONSE, (74) (GO) REGULATION OF DEFENSE RESPONSE, (75) (GO) REGULATION OF LYMPHOCYTE MEDIATED IMMUNITY, (76) (GO) CELL JUNCTION ORGANIZATION, (77) (GO) CELL SUBSTRATE JUNCTION, (78) (GO) MYELOID LEUKOCYTE ACTIVATION, (79) (GO) CELL ACTIVATION INVOLVED IN IMMUNE RESPONSE, (80) (GO) LEUKOCYTE MEDIATED IMMUNITY, (81) (GO) CELL JUNCTION ASSEMBLY, (82) (GO) REGULATION OF INTRACELLULAR SIGNAL TRANSDUCTION, (83) (GO) REGULATION OF RESPONSE TO STRESS</p> |
| Down_PD | <p>(1) (H)K MTORC1 SIGNALING, (2) (R) APC C CDH1 MEDIATED DEGRADATION OF CDC20 AND OTHER APC C CDH1 TARGETED PROTEINS IN LATE MITOSIS EARLY G1, (3) (R) ASSEMBLY OF THE PRE REPLICATIVE COMPLEX, (4) (R) CELL CYCLE CHECKPOINTS, (5) (R) DNA REPLICATION, (6) (R) HIV INFECTION, (7) (R) MITOCHONDRIAL PROTEIN IMPORT, (8) (R) MITOCHONDRIAL TRANSLATION, (9) (R) MITOTIC G2 G2 M PHASES, (10) (R) MITOTIC METAPHASE AND ANAPHASE, (11) (R) ORC1 REMOVAL FROM CHROMATIN, (12) (R) SEPARATION OF SISTER CHROMATIDS, (13) (R) SWITCHING OF ORIGINS TO A POST REPLICATIVE STATE, (14) (R) THE CITRIC ACID TCA CYCLE AND RESPIRATORY ELECTRON TRANSPORT, (15) (R) METABOLISM OF POLYAMINES, (16) (R) THE ROLE OF GTSE1 IN G2 M</p> | <p>(1) (GO) MICROTUBULE BASED MOVEMENT, (2) (GO) CYTOPLASMIC REGION, (3) (GO) CELL PART MORPHOGENESIS, (4) (GO) PLASMA MEMBRANE BOUNDED CELL PROJECTION CYTOPLASM</p>                                                                                                                                                                                                                                                                                                                                                                                                                                                                                                                                                                                                                                                                                                                                                                                                                                                                                                                                                                                                                                                                                                                                                   |

|  |                                                                                                                                                                                                                                                                                                                                                                                                                                                                                                                                                                                                                                                                                                                                                                                                                                                                                                                                                                                                                                                                                          |  |
|--|------------------------------------------------------------------------------------------------------------------------------------------------------------------------------------------------------------------------------------------------------------------------------------------------------------------------------------------------------------------------------------------------------------------------------------------------------------------------------------------------------------------------------------------------------------------------------------------------------------------------------------------------------------------------------------------------------------------------------------------------------------------------------------------------------------------------------------------------------------------------------------------------------------------------------------------------------------------------------------------------------------------------------------------------------------------------------------------|--|
|  | <p>PROGRESSION AFTER G2 CHECKPOINT, (17) (R) APC C MEDIATED DEGRADATION OF CELL CYCLE PROTEINS, (18) (R) DNA REPLICATION PRE INITIATION, (19) (R) STABILIZATION OF P53, (20) (R) SCF SKP2 MEDIATED DEGRADATION OF P27 P21, (21) (R) G2 M CHECKPOINTS, (22) (R) G1 S DNA DAMAGE CHECKPOINTS, (23) (R) M PHASE, (24) (R) (GO)LGI TO ER RETROGRADE TRANSPORT, (25) (R) COPI DEPENDENT (GO)LGI TO ER RETROGRADE TRAFFIC, (26) (GO) ANAPHASE PROMOTING COMPLEX DEPENDENT CATABOLIC PROCESS, (27) (GO) ENDOPEPTIDASE COMPLEX, (28) (GO) ENVELOPE, (29) (GO) MITOCHONDRIAL ENVELOPE, (30) (GO) MITOCHONDRIAL GENE EXPRESSION, (31) (GO) MITOCHONDRIAL MATRIX, (32) (GO) MITOCHONDRIAL PROTEIN COMPLEX, (33) (GO) MITOCHONDRIAL TRANSLATION, (34) (GO) MITOCHONDRIAL TRANSLATIONAL TERMINATION, (35) (GO) MITOCHONDRION, (36) (GO) ORGANELLAR RIBOSOME, (37) (GO) ORGANELLE INNER MEMBRANE, (38) (GO) TRANSLATIONAL ELONGATION, (39) (GO) TRANSLATIONAL TERMINATION, (40) (GO) CELLULAR AMINO ACID METABOLIC PROCESS, (41) (GO) CELL CYCLE G2 M PHASE TRANSITION, (42) (GO) COFACTOR BINDING</p> |  |
|--|------------------------------------------------------------------------------------------------------------------------------------------------------------------------------------------------------------------------------------------------------------------------------------------------------------------------------------------------------------------------------------------------------------------------------------------------------------------------------------------------------------------------------------------------------------------------------------------------------------------------------------------------------------------------------------------------------------------------------------------------------------------------------------------------------------------------------------------------------------------------------------------------------------------------------------------------------------------------------------------------------------------------------------------------------------------------------------------|--|

**Table S22.** Jointly deregulated pathways in PD and PRCA.

|       | Up_PRCA                                                                                                                                       | Down_PRCA                                                                                                                                                                                                                                                                                                                                                                                                                                                                                                                                                                                                                                                                    |
|-------|-----------------------------------------------------------------------------------------------------------------------------------------------|------------------------------------------------------------------------------------------------------------------------------------------------------------------------------------------------------------------------------------------------------------------------------------------------------------------------------------------------------------------------------------------------------------------------------------------------------------------------------------------------------------------------------------------------------------------------------------------------------------------------------------------------------------------------------|
| Up_PD | <p>(1) (R) RESPONSE OF EIF2AK4 GCN2 TO AMINO ACID DEFICIENCY, (2) (R) EUKARYOTIC TRANSLATION ELONGATION, (3) (GO) CHROMOSOME ORGANIZATION</p> | <p>(1) (R) EXTRACELLULAR MATRIX ORGANIZATION, (2) (GO) ANATOMICAL STRUCTURE FORMATION INVOLVED IN MORPHOGENESIS, (3) (GO) BIOLOGICAL ADHESION, (4) (GO) BLOOD VESSEL MORPHOGENESIS, (5) (GO) CARDIOVASCULAR SYSTEM DEVELOPMENT, (6) (GO) CELL MOTILITY, (7) (GO) CIRCULATORY SYSTEM DEVELOPMENT, (8) (GO) COLLAGEN CONTAINING EXTRACELLULAR MATRIX, (9) (GO) EMBRYO DEVELOPMENT, (10) (GO) EPITHELIAL CELL DIFFERENTIATION, (11) (GO) EXTRACELLULAR STRUCTURE ORGANIZATION, (12) (GO) LOCOMOTION, (13) (GO) NEGATIVE REGULATION OF MULTICELLULAR ORGANISMAL PROCESS, (14) (GO) POSITIVE REGULATION OF DEVELOPMENTAL PROCESS, (15) (GO) REGULATION OF CELL ADHESION, (16)</p> |

|         |                                                                                                                                                                                                                                                                                                                                                                                                                                                                                                                                                 |                                                                                                                                                                                                                                                                                                                                                                                                                                                                                                                                                                                                                                                                                                                                                                         |
|---------|-------------------------------------------------------------------------------------------------------------------------------------------------------------------------------------------------------------------------------------------------------------------------------------------------------------------------------------------------------------------------------------------------------------------------------------------------------------------------------------------------------------------------------------------------|-------------------------------------------------------------------------------------------------------------------------------------------------------------------------------------------------------------------------------------------------------------------------------------------------------------------------------------------------------------------------------------------------------------------------------------------------------------------------------------------------------------------------------------------------------------------------------------------------------------------------------------------------------------------------------------------------------------------------------------------------------------------------|
|         |                                                                                                                                                                                                                                                                                                                                                                                                                                                                                                                                                 | (GO) REGULATION OF CELL POPULATION PROLIFERATION, (17) (GO) REGULATION OF VASCULATURE DEVELOPMENT, (18) (GO) SKELETAL SYSTEM DEVELOPMENT, (19) (GO) TUBE DEVELOPMENT, (20) (GO) TUBE MORPHOGENESIS, (21) (GO) MUSCLE STRUCTURE DEVELOPMENT, (22) (GO) REGULATION OF CELLULAR COMPONENT MOVEMENT, (23) (GO) POSITIVE REGULATION OF LOCOMOTION, (24) (GO) CELL SUBSTRATE ADHESION, (25) (GO) ANCHORING JUNCTION, (26) (GO) NEGATIVE REGULATION OF CELL POPULATION PROLIFERATION, (27) (GO) REGULATION OF OSSIFICATION, (28) (GO) CELL JUNCTION ORGANIZATION, (29) (GO) CELL SUBSTRATE JUNCTION, (30) (GO) CELL JUNCTION ASSEMBLY, (31) (GO) REGULATION OF INTRACELLULAR SIGNAL TRANSDUCTION, (32) (GO) NEGATIVE REGULATION OF CELLULAR RESPONSE TO GROWTH FACTOR STIMULUS |
| Down_PD | (1) (H)K MTORC1 SIGNALING, (2) (R) ASPARAGINE N LINKED GLYCOSYLATION, (3) (R) CELL CYCLE CHECKPOINTS, (4) (R) MITOCHONDRIAL TRANSLATION, (5) (R) MITOTIC METAPHASE AND ANAPHASE, (6) (R) G2 M CHECKPOINTS, (7) (R) M PHASE, (8) (GO) MITOCHONDRIAL GENE EXPRESSION, (9) (GO) MITOCHONDRIAL MATRIX, (10) (GO) MITOCHONDRIAL PROTEIN COMPLEX, (11) (GO) MITOCHONDRIAL TRANSLATION, (12) (GO) MITOCHONDRION, (13) (GO) CELLULAR AMINO ACID METABOLIC PROCESS, (14) (GO) SMALL MOLECULE METABOLIC PROCESS, (15) (GO) ORGANIC ACID METABOLIC PROCESS | (1) (GO) SYNAPSE, (2) (GO) NEURON DEVELOPMENT, (3) (GO) CELL PART MORPHOGENESIS, (4) (GO) CELL MORPHOGENESIS INVOLVED IN NEURON DIFFERENTIATION, (5) (GO) CELL CELL SIGNALING                                                                                                                                                                                                                                                                                                                                                                                                                                                                                                                                                                                           |

**Table S23.** Number of consensus co-expression modules and modules significantly correlated with disease status found in each disorder.

| 10    | N° Modules | N° Modules significantly associated with disease status | N° Modules positively correlated with disease status | N° Modules negatively correlated with disease status |
|-------|------------|---------------------------------------------------------|------------------------------------------------------|------------------------------------------------------|
| AD    | 33         | 13                                                      | 6                                                    | 7                                                    |
| PD    | 20         | 8                                                       | 5                                                    | 3                                                    |
| ALL   | 16         | 8                                                       | 3                                                    | 5                                                    |
| AML   | 11         | 8                                                       | 4                                                    | 4                                                    |
| BLCA  | 15         | 11                                                      | 4                                                    | 7                                                    |
| BRCA  | 32         | 27                                                      | 16                                                   | 11                                                   |
| BRNCA | 12         | 12                                                      | 6                                                    | 6                                                    |
| CERV  | 45         | 21                                                      | 13                                                   | 8                                                    |
| CHLCA | 13         | 10                                                      | 6                                                    | 4                                                    |
| CLL   | 13         | 9                                                       | 4                                                    | 5                                                    |
| CML   | 58         | 10                                                      | 5                                                    | 5                                                    |
| CRCA  | 26         | 24                                                      | 15                                                   | 9                                                    |

|        |    |    |    |    |
|--------|----|----|----|----|
| DLBCL  | 29 | 23 | 13 | 10 |
| FLYMPH | 31 | 18 | 15 | 3  |
| HANC   | 8  | 6  | 3  | 3  |
| KDNCA  | 13 | 13 | 8  | 5  |
| LGCA   | 25 | 24 | 14 | 10 |
| LIVCA  | 44 | 39 | 23 | 16 |
| OVCA   | 75 | 39 | 23 | 16 |
| PACA   | 48 | 37 | 20 | 17 |
| PRCA   | 51 | 31 | 13 | 18 |
| SKCM   | 23 | 19 | 12 | 7  |
| STCA   | 9  | 8  | 5  | 3  |
| THCA   | 41 | 30 | 13 | 17 |

**Table S24.** Disease identifiers employed to query the gene-disease association databases. Genes and variant-genes identified for each disorder using the stringent selection criterion, which are included in the interactome 1. Genes included in the largest connected component.

| Disorder | IDs used in the different DBs.                                                                                                                                                                      | Disease associated genes and variant-genes (stringent)                                                                                                                                                                                                                                                                                                                                                                                                                                                                                                                      | Genes included in the largest connected component in the interactome 1 stringent analysis |
|----------|-----------------------------------------------------------------------------------------------------------------------------------------------------------------------------------------------------|-----------------------------------------------------------------------------------------------------------------------------------------------------------------------------------------------------------------------------------------------------------------------------------------------------------------------------------------------------------------------------------------------------------------------------------------------------------------------------------------------------------------------------------------------------------------------------|-------------------------------------------------------------------------------------------|
| AD       | <b>-DisGeNet MESH:</b> D000544<br><b>-EDGAR:</b> 104300<br><b>-PhenGeID trait:</b> Alzheimer Disease                                                                                                | SORL1, NOS3, ACE, PLAU, MPO,<br>APP, PSEN1, APBB2, PAXIP1,<br>BLMH, PSEN2, HFE, A2M,<br>ADAM10, GSK3B, APOE, MAPT,<br>TREM2, BACE1, IDE, IL1B, INSR,<br>LEP, NPY, BCL2, BDNF, CASP3,<br>IL6R, CR1, MRPL50P4, SPON1,<br>MS4A2, MS4A6A, MIR6503,<br>PICALM, MMP3, BCAS3, CYB561,<br>ABCA7, PVRL2, TOMM40, APOC1,<br>BIN1, ACKR2, CCRL2,<br>LOC102724297, SUCLG2, SNAR-I,<br>RANP6, LOC100289673, HLA-DRB1,<br>CD2AP, GAPDHP15, BZW2,<br>EPHA1-AS1, PTK2B, CLU, MIR6843,<br>HNF4G, SLC16A9, MS4A4A,<br>FNTAP1, MMP12, CYP27C1, OSTN,<br>FBXO8, HLA-DQA1, RBBP4P4,<br>LINC01111 | PSEN1, APP, TOMM40, GSK3B,<br>PSEN2, MAPT                                                 |
| ASD      | <b>-DisGeNet MESH:</b> D000067877<br><b>-EDGAR:</b> PS209850, 605309<br><b>-PhenGeID trait:</b> Autism Spectrum Disorder Autistic Disorder Child Development Disorders, Pervasive Asperger Syndrome | NLGN3, CHD8, MECP2, NLGN4X,<br>SLC9A9, MET, EN2, CNTNAP2,<br>RPL10, PTCHD1, EIF4E, SHANK2,<br>TMLHE, PTEN, NRXN2, SHANK3,<br>NRXN1, ITIH3, TRIM26                                                                                                                                                                                                                                                                                                                                                                                                                           | EIF4E                                                                                     |
| BD       | <b>-DisGeNet MESH:</b> D001714<br><b>-EDGAR:</b> NA<br><b>-PhenGeID trait:</b> Bipolar Disorder                                                                                                     | S100B, COMT, ANK3, CACNA1C,<br>NCAN, SP4, ADCY2, POLG,<br>LMAN2L, FADS2, DRD1, GAD1,<br>NR3C1, GSK3B, ITIH1, MTHFR,<br>BDNF, SLC6A4, CLOCK, ITIH3,<br>TRIM26, MAD1L1                                                                                                                                                                                                                                                                                                                                                                                                        | ANK3, NR3C1, GSK3B, CLOCK,<br>BDNF                                                        |
| HD       | <b>-DisGeNet MESH:</b> D006816<br><b>-EDGAR:</b> 143100<br><b>-PhenGeID trait:</b> NA                                                                                                               | HTT                                                                                                                                                                                                                                                                                                                                                                                                                                                                                                                                                                         | HTT                                                                                       |
| MD       | <b>-DisGeNet MESH:</b> D003866<br><b>-EDGAR:</b> 608516<br><b>-PhenGeID trait:</b> Depression Depressive Disorder Depressive Disorder, Major                                                        | FKBP5, TPH2, APOE, DISC1,<br>SLC6A4, FGFR1, SOD1, CRH,<br>NR3C1, IL6, KCNK2, MTHFR, NPY,<br>PTGS2, BDNF, S100A10, TOMM40,<br>SEPT3, WBP2NL, CYP2D6, ITIH3,<br>TRIM26, CYP2C9                                                                                                                                                                                                                                                                                                                                                                                                | NR3C1, BDNF                                                                               |
| PD       | <b>-DisGeNet MESH:</b> D010300<br><b>-EDGAR:</b> PS168600<br><b>-PhenGeID trait:</b> Parkinson Disease                                                                                              | GIGYF2, GBA, PODXL, PINK1,<br>HTRA2, CHCHD2, LRRK2, PARK7,<br>ATP13A2, PARK2, PLA2G6, SYNJ1,                                                                                                                                                                                                                                                                                                                                                                                                                                                                                | CHCHD2, PARK7, PARK2, SNCA,<br>PINK1                                                      |

|      |                                                                                                                                                                                                  |                                                                                                                                                                                                                                                                                                                                                                                                                                                                                                                                                                                              |                                                                                                                                                                                                                                                                                                                                                                                                                                                                 |
|------|--------------------------------------------------------------------------------------------------------------------------------------------------------------------------------------------------|----------------------------------------------------------------------------------------------------------------------------------------------------------------------------------------------------------------------------------------------------------------------------------------------------------------------------------------------------------------------------------------------------------------------------------------------------------------------------------------------------------------------------------------------------------------------------------------------|-----------------------------------------------------------------------------------------------------------------------------------------------------------------------------------------------------------------------------------------------------------------------------------------------------------------------------------------------------------------------------------------------------------------------------------------------------------------|
|      |                                                                                                                                                                                                  | DNAJC13, VPS13C, NR4A2,<br>UCHL1, VPS35, SNCAIP, TBP,<br>EIF4G1, GLUD2, ADH1C, MAPT,<br>SNCA, ATXN2, ATXN3, FGF20,<br>DDC, DRD2, MAOB, SLC18A2, TH,<br>RAB25, NUCKS1, RAB29, TIAL1,<br>INPP5F, SLC2A13, CNTN1, GCH1,<br>TMEM229B, TPM1, BCKDK,<br>CRHR1, SPPL2C, NSF, WNT3, RIT2,<br>DCUN1D1, MCCC1, GAK,<br>TMEM175, DGKQ, BST1, FAM47E-<br>STBD1, LHFPL2, HLA-DRB1, HLA-<br>DQB1, FAM126A, GPNMB,<br>KRTCAP2, SLC41A1, SYT10,<br>ACMSD, CERS6, DDRGK1,<br>MMRN1, HLA-DRA, HLA-DQA1                                                                                                         |                                                                                                                                                                                                                                                                                                                                                                                                                                                                 |
| SCZ  | <b>-DisGeNet MESH:</b> D012559<br><b>-EDGAR:</b> 181500 604906 603013 600850 613950 615232<br><b>-PhenGeID trait:</b> Schizophrenia                                                              | DRD3, DISC1, MTHFR, DAO,<br>COMT, SETD1A, AKT1, RTN4R,<br>CHI3L1, DTNBP1, APOL4, SYN2,<br>APOL2, MC4R, SLC1A1, SHANK3,<br>PRODH, NRG1, MAGI2, CHRNA7,<br>GRIN2B, NOS1, RELN, SRR, TCF4,<br>NRXN1, SP4, PPP3R1, SYNGAP1,<br>MDK, GRM5, GSK3B, ZDHHC8,<br>APOE, NR4A2, SLC6A3, PPP1R1B,<br>KMO                                                                                                                                                                                                                                                                                                 | AKT1, GSK3B                                                                                                                                                                                                                                                                                                                                                                                                                                                     |
| ALL  | <b>-DisGeNet MESH:</b> D054198<br><b>-EDGAR:</b> 613065<br><b>-PhenGeID trait:</b> Precursor B-Cell<br>Lymphoblastic Leukemia-<br>Lymphoma Precursor Cell<br>Lymphoblastic Leukemia-<br>Lymphoma | TAL1, TCF3, TAL2, BAX, PAX5,<br>NBN, NUP214, FLT3, BCR, IKZF1,<br>CDKN2A, ABL1, GATA3, LHPP,<br>CEBPE, C14orf119                                                                                                                                                                                                                                                                                                                                                                                                                                                                             | TCF3, ABL1, GATA3, TAL1, FLT3,<br>BCR, CEBPE                                                                                                                                                                                                                                                                                                                                                                                                                    |
| AML  | <b>-DisGeNet MESH:</b> D015470<br><b>-EDGAR:</b> 601626<br><b>-PhenGeID trait:</b> Myeloproliferative<br>Disorders                                                                               | TGM6, SETBP1, SH3GL1, FLT3,<br>CHIC2, CEBPA, NPM1, WHSC1L1,<br>CFBF, JAK2, NUP214, TERT, MLF1,<br>MLLT10, LPP, GATA2, KRAS, ETV6,<br>DDX41, KIT, RUNX1, NSD1,<br>PICALM, DNMT3A, PTPN11, IDH1,<br>IDH2, NRAS, TP53, WT1, SBDS,<br>CREBBP, KMT2A, SPI1                                                                                                                                                                                                                                                                                                                                        | CFBF, PICALM, MLLT10, CHIC2,<br>DNMT3A, RUNX1, NSD1, KMT2A,<br>CREBBP, NRAS, SPI1, TP53, CEBPA,<br>ETV6, LPP, WHSC1L1                                                                                                                                                                                                                                                                                                                                           |
| BLCA | <b>-DisGeNet MESH:</b> D001749<br><b>-EDGAR:</b> 109800<br><b>-PhenGeID trait:</b> Urinary Bladder<br>Neoplasms                                                                                  | HRAS, FGFR3, RB1, KRAS, ATM,<br>CDH1, NQO1, ERCC2, GSTP1, TP53,<br>CDKN2A, TSC1, SLC14A1, CBX6,<br>TACC3, CLPTM1L, CWC27, NAT2,<br>PSCA, CCNE1, APOBEC3A, PSD3                                                                                                                                                                                                                                                                                                                                                                                                                               | ATM, TP53                                                                                                                                                                                                                                                                                                                                                                                                                                                       |
| BRCA | <b>-DisGeNet MESH:</b> D001943<br><b>-EDGAR:</b> 114480<br><b>-PhenGeID trait:</b> Breast<br>Neoplasms Triple Negative Breast<br>Neoplasms                                                       | TSG101, HMMR, ATM, NQO2,<br>AKT1, BRIP1, XRCC3, RB1CC1,<br>PPM1D, RAD54L, FAM175A, NBN,<br>CDH1, CHEK2, BRCA1, BRCA2,<br>BARD1, KRAS, TP53, SLC22A18,<br>ESR1, PHB, PALB2, CASP8, RAD51,<br>PIK3CA, ERBB2, PTEN, CAV1,<br>EP300, FGFR2, NOTCH2, CDKN1B,<br>PARP1, NQO1, AKT2, ESR2, FGF3,<br>FGFR1, FLT1, FN1, GATA3, FOXA1,<br>HRAS, IGF1, AR, MDM2, MMP1,<br>NOS2, NOTCH1, ROR1, FBXW7,<br>PTHLH, RB1, STAT1, TBX3, NCOA3,<br>BAP1, FGF4, TRIM33, MDM4,<br>MLLT10, DNAJC1, ZNF365, ZMIZ1,<br>LSP1, KRT8, USP44, PAX9, PELI2,<br>RAD51B, NTRK3, TOX3, FTO,<br>CDYL2, HNF1B, STXBP4, BABAM1, | IGF1, SLC4A7, HMMR, MLLT10,<br>AKT2, BABAM1, GATA3, CDKN1B,<br>NQO2, BARD1, ESR2, AKT1, ATM,<br>TNXB, PAX9, BAG6, CDSN, MDM4,<br>EP300, PRRC2A, RAD54L, TRIM33,<br>PIK3CA, RB1CC1, NBN, RAD51,<br>NOTCH4, RB1, PHB, NCOA3, BAP1,<br>CAV1, PPM1D, STXBP4, ELL,<br>STAT1, TP53, MDM2, BRCA1,<br>CCND1, ESR1, BRCA2, AR, CHEK2,<br>ERBB2, FGFR2, NOTCH1, FAM175A,<br>SEMA3A, FOXA1, ERBB4, ENPP2,<br>HNF1B, BRIP1, HNF4G, PTEN,<br>PTHLH, NTRK3, USP44, GLI2, TERT |

|        |                                                                                            |                                                                                                                                                                                                                                                                                                                                                                                                                                                                      |                                                                                                                                                                             |
|--------|--------------------------------------------------------------------------------------------|----------------------------------------------------------------------------------------------------------------------------------------------------------------------------------------------------------------------------------------------------------------------------------------------------------------------------------------------------------------------------------------------------------------------------------------------------------------------|-----------------------------------------------------------------------------------------------------------------------------------------------------------------------------|
|        |                                                                                            | ELL, ERBB4, TNF1, NRIP1, CYPR1, MKL1, ITPR1, NEK10, SLC4A7, TERT, MAP3K1, MIER3, EBF1, CDSN, PSORS1C1, DDX39B, MCCC1, AIF1, BAG6, EHMT2, C2, TNXB, NOTCH4, HLA-DRA, HLA-DRB1, HLA-DQA1, HLA-DQB1, TAP2, ADGRB3, UST, CCDC170, SEMA3A, ARHGEF5, NOV, SNX32, MYEOV, CCND1, CCDC91, GLI2, MRPS30, GPBP1, HLA-C, PRRC2A, HLA-DRB5, HLA-DOB, TAB2, HNF4G, ENPP2                                                                                                           |                                                                                                                                                                             |
| BRNCA  | -DisGeNet MESH: D001932<br>-EDGAR: PS137800<br>-PhenGeID trait: Glioblastoma   Glioma      | ERBB2, BRCA2, TP53, PTEN, IDH2, IDH1, POT1, PPARG, ALK, RTEL1, TERT, SEC61G, ZBTB16, PHLDB1, POLR2A, EGFR, PHLDA1                                                                                                                                                                                                                                                                                                                                                    | TP53, EGFR, ERBB2, PTEN                                                                                                                                                     |
| CERV   | -DisGeNet MESH: D002583<br>-EDGAR: 603956<br>-PhenGeID trait: Uterine Cervical Neoplasms   | FGFR3, HLA-DRB1, HLA-DQA1                                                                                                                                                                                                                                                                                                                                                                                                                                            | HLA-DRB1, HLA-DQA1                                                                                                                                                          |
| CHLCA  | -DisGeNet MESH: D018281<br>-EDGAR: NA<br>-PhenGeID trait: NA                               | IDH1, TP53, KRAS                                                                                                                                                                                                                                                                                                                                                                                                                                                     | TP53                                                                                                                                                                        |
| CLL    | -DisGeNet MESH: D015451<br>-EDGAR: NA<br>-PhenGeID trait: Leukemia, Lymphocytic            | TP53, ATM, PLCG2, POT1, ID3, ACTA2, FAS, TSPAN32, C11orf21, BMF, MNS1, RPLP1, PHLPP1, BCL2, ACOXL, BCL2L11, CFLAR, SP110, SP140, FARP2, EOMES, ULK4, IRF4, HLA-DRB1, BAK1, TMPRSS5, BUB1B, ZNF280D, IRF8, CMC1, EXOC2, HLA-DQA1                                                                                                                                                                                                                                      | BMF, ATM, ZNF280D, TP53, BCL2                                                                                                                                               |
| CML    | -DisGeNet MESH: D054438<br>-EDGAR: NA<br>-PhenGeID trait: Leukemia, Myeloid, Chronic-Phase | SETBP1, BCR                                                                                                                                                                                                                                                                                                                                                                                                                                                          | SETBP1                                                                                                                                                                      |
| CRCA   | -DisGeNet MESH: D015179<br>-EDGAR: 114500<br>-PhenGeID trait: Colorectal Neoplasms         | MT-CO1, BUB1B, MLH3, BAX, PDGFRL, CTNNB1, AKT1, ODC1, AXIN2, RAD54B, PIK3CA, NRAS, AURKA, DLC1, TRIM28, PLA2G2A, EP300, FGFR3, TP53, CCND1, PTPN12, MCC, KAT5, TLR2, BRAF, TLR4, APC, PTPRJ, MLH1, MSH2, CHEK2, SMAD3, SMAD4, MMP2, TCF7L2, BUB1, KLF5, MSH6, IGFBP3, KDR, KRAS, ABCB1, POLD1, POLE, RET, STK11, DPYD, TYMS, NKX2-3, CYP17A1, FGFR2, MYRF, POLD3, SPSB2, ETV6, KRT8, BRCA2, GREM1, HNF1B, SMAD7, UTP23, SLC25A28, MYEOV, RPS21, MAP3K1, EIF3H, RAD21 | MLH1, SMAD4, AKT1, TCF7L2, SMAD3, BUB1, TRIM28, EP300, BRAF, BUB1B, PIK3CA, RAD21, MSH6, TYMS, AURKA, APC, STK11, TP53, MSH2, CTNNB1, RET, CHEK2, FGFR2, KDR, FGFR3, NKX2-3 |
| DLBCL  | -DisGeNet MESH: D016403<br>-EDGAR: NA<br>-PhenGeID trait: Lymphoma, Large B-Cell, Diffuse  | EZH2, MYD88, PIK3CD, CARD11, CD79B, IRF4, EXOC2                                                                                                                                                                                                                                                                                                                                                                                                                      | CD79B                                                                                                                                                                       |
| FLYMPH | -DisGeNet MESH: D008224<br>-EDGAR: NA<br>-PhenGeID trait: Lymphoma, Follicular             | EZH2, BCL2, HLA-DQB1, CXCR5, FLI1, C6orf15, HLA-DRB5                                                                                                                                                                                                                                                                                                                                                                                                                 | EZH2                                                                                                                                                                        |
| HANC   | -DisGeNet MESH: D006258<br>-EDGAR: 275355                                                  | PTEN, TNFRSF10B, EGFR, ING1, ING3, ADH1B, ADH7                                                                                                                                                                                                                                                                                                                                                                                                                       | EGFR, PTEN                                                                                                                                                                  |

|       |                                                                                                                                               |                                                                                                                                                                                                                                                                                                                                                                                                                                                                                                                                    |                                                                                                 |
|-------|-----------------------------------------------------------------------------------------------------------------------------------------------|------------------------------------------------------------------------------------------------------------------------------------------------------------------------------------------------------------------------------------------------------------------------------------------------------------------------------------------------------------------------------------------------------------------------------------------------------------------------------------------------------------------------------------|-------------------------------------------------------------------------------------------------|
|       | -PhenGeID trait: Carcinoma, squamous cell of head and neck Head and Neck Neoplasms                                                            |                                                                                                                                                                                                                                                                                                                                                                                                                                                                                                                                    |                                                                                                 |
| KDNCA | -DisGeNet MESH: D002292<br>-EDGAR: 144700 605074<br>-PhenGeID trait: Carcinoma, Renal Cell                                                    | DIRC2, HNF1B, VHL, HNF1A, RNF139, OGG1, PRCC, MET, EPAS1, PTEN, SETD2, PBRM1, PTGS2, MTOR, TSC1, KDM5C, BAP1                                                                                                                                                                                                                                                                                                                                                                                                                       | SETD2, PBRM1, HNF1A, PTGS2, HNF1B                                                               |
| LGCA  | -DisGeNet MESH: D008175<br>-EDGAR: 211980<br>-PhenGeID trait: Adenocarcinoma of lung Carcinoma, Non-Small-Cell Lung Small Cell Lung Carcinoma | ERBB2, IRF1, SLC22A18, ERCC6, RASSF1, PIK3CA, EGFR, MAP3K8, CASP8, PARK2, FASLG, BRAF, PPP2R1B, KRAS, CYP2A6, CDKN2A, TP53, BRCA2, PTEN, GSTP1, ERCC1, STK11, VTI1A, FGFR2, KRT8, HNF1B, BPTF, TP63, TERT, BAG6, APOM, MYEOV, MAP3K1                                                                                                                                                                                                                                                                                               | GSTP1, BRAF, STK11, TP53, EGFR, ERBB2, FGFR2, PARK2, IRF1, CYP2A6, CDKN2A, PTEN                 |
| LIVCA | -DisGeNet MESH: D006528<br>-EDGAR: 114550<br>-PhenGeID trait: Carcinoma, Hepatocellular                                                       | TP53, AXIN1, MTUS1, CDKN3, PIK3CA, CASP8, PDGFRL, CTNNB1, MET, APC, IGF2R, HNF1A, CDKN2A, IGF2, KRAS, HTATIP2, ARID2, FOXM1, GPC3, GNMT, MYC, ABCB1, PTEN, PTGS2, PTK2, HAMP, SKP2, TERT, TGFA, CCNE1, CDK1, KIF1B, HLA-DRB1, HLA-DQB1, HLA-DQA1                                                                                                                                                                                                                                                                                   | CASP8, MTUS1, PTK2, FOXM1, CDK1, AXIN1, APC, TP53, CTNNB1, MYC, MET, IGF2R, HNF1A, PTGS2, GPC3  |
| OVCA  | -DisGeNet MESH: D010051<br>-EDGAR: 167000<br>-PhenGeID trait: Ovarian Neoplasms Ovarian epithelial cancer                                     | BRCA1, PIK3CA, RRAS2, PARK2, CTNNB1, AKT1, SEPT9, CDH1, OPCML, BRCA2, ERBB2, KRAS, MLH1, MSH2, PTEN, TP53, RAD51C, BRIP1, PMS2, ESR1, CCNE1, RAD51D, BRAF, RSP01, FGFR2, KRT8, HNF1B, NSF, SKAP1, BABAM1, HOXD3, MYEOV, MAP3K1, IFNL3                                                                                                                                                                                                                                                                                              | MLH1, AKT1, BRAF, PMS2, TP53, BRCA1, MSH2, ESR1, CDH1, CTNNB1, BRCA2, ERBB2, FGFR2, BRIP1, PTEN |
| PACA  | -DisGeNet MESH: D010190<br>-EDGAR: 260350 613348 606856 614320 613347<br>-PhenGeID trait: Pancreatic Carcinoma Pancreatic Neoplasms           | RBBP8, TP53, ACVR1B, SMAD4, STK11, KRAS, PALLD, BRCA2, PALB2, BRCA1, CDKN2A, BACH1, TFF2, TERT, CLPTM1L, ABO, NR5A2, PRLHR, TFF1                                                                                                                                                                                                                                                                                                                                                                                                   | RBBP8, BRCA1, BACH1, BRCA2                                                                      |
| PRCA  | -DisGeNet MESH: D011471<br>-EDGAR: 176807 614731 601518 611928 611868<br>-PhenGeID trait: Prostatic Neoplasms                                 | EPHB2, BRCA2, PTEN, MAD1L1, HIP1, CD82, ZFHX3, KLF6, AR, MXI1, CDH1, FGFR4, MSR1, CHEK2, HOXB13, RNASEL, MSMB, ELAC2, EHBP1, APC, SPOP, CTNNB1, IGF1, NKX3-1, KRAS, CCND1, TGFB2, KCND3, GOLPH3L, MDM4, FGFR2, MMP7, TUBA1C, KRT8, FERMT2, VPS53, HNF1B, DPF1, PCAT19, KLK15, KLK3, GGCX, TANC1, ITGA6, ADNP, ZGPAT, XAGE3, TEX11, SIDT1, PRKCI, SKIL, AFM, PDLIM5, TERT, RFX6, RGS17, SLC22A1, JAZF1, EBF2, FAM84B, RAD23B, ASCL2, MYEOV, PRPH, TBX5, PPP1R14A, KLK2, LILRA5, VAMP8, BIK, NUDT11, SLC7A3, CLDN11, MAP3K1, SLC22A2 | TBX5, FERMT2, APC, CDH1, CTNNB1, FGFR2, PTEN                                                    |
| SKCM  | -DisGeNet MESH: D008545<br>-EDGAR: PS155600<br>-PhenGeID trait: Melanoma                                                                      | CDKN2A, STK11, POT1, PTEN, CDK4, BRAF, MITF, XRCC3, TERT, TYR, HRAS, ERBB4, GNA11, GNAQ, NRAS, MAP2K1, TP53, BAP1, MAP2K2, NF1, RAC1, FTO, CDK10, AFG3L1P, RALY, PIGU, MYH7B,                                                                                                                                                                                                                                                                                                                                                      | MTAP, RALY, MAP2K2, FTO, MAP2K1, NF1, BRAF, GNAQ, STK11, TP53, GNA11, TYR, PTEN, MITF           |

|      |                                                                                                             |                                                                                                                                   |                               |
|------|-------------------------------------------------------------------------------------------------------------|-----------------------------------------------------------------------------------------------------------------------------------|-------------------------------|
|      |                                                                                                             | <i>SLC45A2, IRF4, MTAP, CCND1, EXOC2</i>                                                                                          |                               |
| STCA | <b>-DisGeNet MESH:</b> D013274<br><b>-EDGAR:</b> 137215 613659<br><b>-PhenGeID trait:</b> Stomach Neoplasms | <i>ERBB2, MUTYH, IRF1, PIK3CA, CASP10, KLF6, APC, FGFR2, KRAS, CDH1, IL1RN, IL1B, MET, ATM, MUC1, ASH1L, PRKAA1, DNAH11, PSCA</i> | <i>ERBB2, IRF1, KLF6</i>      |
| THCA | <b>-DisGeNet MESH:</b> D013964<br><b>-EDGAR:</b> PS188550<br><b>-PhenGeID trait:</b> Thyroid Neoplasms      | <i>NKX2-1, FOXE1, BRAF, HABP2, RET, KRAS, TSHR, TP53, PCNXL2, OBFC1, NRG1, SLK, MBIP</i>                                          | <i>NRG1, BRAF, TP53, TSHR</i> |

**Table S25.** Genes and variant-associated genes included in the stringent and relaxed analyses.

| Disorder | Disease-associated genes and variant-genes<br>stringent                                                                                                                                                                                                                                                                                                                                                                                                                                                               | Disease-associated genes and variant genes<br>relaxed                                                                                                                                                                                                                                                                                                                                                                                                                                                                                                                                                                                                                                                                                                                                                                                                                                                                                                                                                                                                                                                                                                                                                                                                                                                                                                                                                                                                                         |
|----------|-----------------------------------------------------------------------------------------------------------------------------------------------------------------------------------------------------------------------------------------------------------------------------------------------------------------------------------------------------------------------------------------------------------------------------------------------------------------------------------------------------------------------|-------------------------------------------------------------------------------------------------------------------------------------------------------------------------------------------------------------------------------------------------------------------------------------------------------------------------------------------------------------------------------------------------------------------------------------------------------------------------------------------------------------------------------------------------------------------------------------------------------------------------------------------------------------------------------------------------------------------------------------------------------------------------------------------------------------------------------------------------------------------------------------------------------------------------------------------------------------------------------------------------------------------------------------------------------------------------------------------------------------------------------------------------------------------------------------------------------------------------------------------------------------------------------------------------------------------------------------------------------------------------------------------------------------------------------------------------------------------------------|
| AD       | SORL1, NOS3, ACE, PLAU, MPO, APP, PSEN1, APBB2, PAXIP1, BLMH, PSEN2, HFE, A2M, ADAM10, GSK3B, APOE, MAPT, TREM2, BACE1, IDE, IL1B, INSR, LEP, NPY, BCL2, BDNF, CASP3, IL6R, CR1, MRPL50P4, SPON1, MS4A2, MS4A6A, MIR6503, PICALM, MMP3, BCAS3, CYB561, ABCA7, PVRL2, TOMM40, APOC1, BIN1, ACKR2, CCRL2, LOC102724297, SUCLG2, SNAR-I, RANP6, LOC100289673, HLA-DRB1, CD2AP, GAPDHP15, BZW2, EPHA1-AS1, PTK2B, CLU, MIR6843, HNF4G, SLC16A9, MS4A4A, FNTAP1, MMP12, CYP27C1, OSTN, FBXO8, HLA-DQA1, RBBP4P4, LINC01111 | SORL1, NOS3, ACE, PLAU, MPO, APP, PSEN1, APBB2, PAXIP1, BLMH, PSEN2, HFE, A2M, ADAM10, GSK3B, APOE, MAPT, TREM2, BACE1, IDE, IL1B, INSR, LEP, NPY, BCL2, BDNF, CASP3, IGF2, IGF1R, ATP5F1A, INS, BAX, TOMM40, ABCA7, CLU, CR1, EPHA1, CD2AP, BIN1, APOC1, PICALM, VSNL1, INPP5D, NECTIN2, MS4A4A, PCDH11X, CASS4, CYP46A1, CHRNA7, CST3, CYP2D6, DHCR24, DPYSL2, ESR1, NCSTN, HMOX1, IGF1, MIR146A, MAOB, ACHE, MTHFR, PPARG, PRNP, RELN, BCHE, TFAM, TNF, VEGFA, CD33, CRH, SOD2, PLCG2, UNC5C, ABI3, WWOX, TF, CHRN2B, SLC30A6, PGRMC1, EIF2S1, F2, ARC, CALM1, ENO1, HLA-DRB5, IGF2R, TPI1, SNAR-I, IQCK, AMFR, MIR100, MIR296, MIR375, SLC2A4, SLC30A4, MIR708, MIR3622B, MIR4467, TPP1, GAPDHS, PYY, MIR505, MIR766, ADAMTS1, RNA5SP43, IL6R, FRMD4A, MRPL50P4, SPON1, RPL36AP40, LOC101928704, MS4A2, MS4A6A, MIR6503, GAB2, MMP3, RPL10P13, MRPL2P1, PCDH8, FERMT2, SLC24A4, LINC00618, RBFOX1, TMC5, VWA3A, LRRC37A, ARL17B, CACNA1G, BCAS3, CYB561, NFATC1, PVRL2, PPP1R37, PAPOLG, TSN, LINC01116, CST1, SYNJ1, ACKR2, CCRL2, LOC102724297, SUCLG2, GABRA2, UCP1, RANP6, LOC100289673, HLA-DRB1, GAPDHP15, RPL17P25, MTHFD1L, BZW2, NECAP1P1, ZCWPW1, EPHA1-AS1, PTK2B, MIR6843, SMARCE1P4, NKAIN3, HNF4G, RFPL4AP5, GLIS3, RPS29P6, SLC16A9, ANO3, FNTAP1, MMP12, PHLDA1, LINC00615, OLFM4, LINC01550, TRL-TAG3-1, LOC284241, LINC01185, CNTNAP5, CYP27C1, FUCA1P1, CSTP2, OSTN, RAC1P2, TBC1D9, FBXO8, HLA-DQA1, RBBP4P4, FAM46A, NME8, ZNF703, LINC01111, FAM84B |
| PD       | GIGYF2, GBA, PODXL, FBXO7, PINK1, HTRA2, CHCHD2, LRRK2, PARK7, ATP13A2, PARK2, PLA2G6, SYNJ1, DNAJC13, DNAJC6, VPS13C, NR4A2, ATXN8OS, UCHL1, VPS35, SNCAIP, TBP, EIF4G1, GLUD2, ADH1C, MAPT, SNCA, ATXN2, ATXN3, FGF20, DDC, DRD2, MAOB, PRKN, SLC18A2, TH, HMGN2P18, RAB25, NUCKS1, RAB29, TIAL1, INPP5F, SPATA19, ASS1P14, SLC2A13, RPL30P13, CNTN1,                                                                                                                                                               | GIGYF2, GBA, PODXL, FBXO7, PINK1, HTRA2, CHCHD2, LRRK2, PARK7, ATP13A2, PARK2, PLA2G6, SYNJ1, DNAJC13, DNAJC6, VPS13C, NR4A2, ATXN8OS, UCHL1, VPS35, SNCAIP, TBP, EIF4G1, GLUD2, ADH1C, MAPT, SNCA, ATXN2, ATXN3, FGF20, DDC, DRD2, MAOB, PRKN, SLC18A2, TH, DRD1, IGF1R, GAK, BST1, HLA-DRA, PARK16, DNMT1L, PPARGC1A, CP, CYP2D6, GDNF, GFAP, TMEM230, GSTM1,                                                                                                                                                                                                                                                                                                                                                                                                                                                                                                                                                                                                                                                                                                                                                                                                                                                                                                                                                                                                                                                                                                               |



|     |                                                                                                                                                                                                                                                                                                                                                                                                                |                                                                                                                                                                                                                                                                                                                                                                                                                                                                                                                                                                                                                                                                                                                                                                                                                                                                                                                                                                                                                    |
|-----|----------------------------------------------------------------------------------------------------------------------------------------------------------------------------------------------------------------------------------------------------------------------------------------------------------------------------------------------------------------------------------------------------------------|--------------------------------------------------------------------------------------------------------------------------------------------------------------------------------------------------------------------------------------------------------------------------------------------------------------------------------------------------------------------------------------------------------------------------------------------------------------------------------------------------------------------------------------------------------------------------------------------------------------------------------------------------------------------------------------------------------------------------------------------------------------------------------------------------------------------------------------------------------------------------------------------------------------------------------------------------------------------------------------------------------------------|
|     | <p>CCDC62, GCH1, TMEM229B, RNA5SP397, TPM1, BCKDK, NCOR1P2, CRHR1, MGC57346, CRHR1-IT1, SPPL2C, MAPT-AS1, NSF, WNT3, RIT2, TMEM163, PHF5GP, LZTS3, DCUN1D1, MCCC1, GAK, TMEM175, DGKQ, BST1, FAM47E, FAM47E-STBD1, GPRIN3, LHFPL2, BTNL2, HLA-DRB1, HLA-DQB1, FAM126A, GPNMB, KRTCAP2, SLC41A1, RAD1P1, MIR4697HG, SYT10, UBBP4, ACMSD, CERS6, DDRGK1, LAMP3, MMRN1, HLA-DRA, HLA-DQA1, MTCO3P1, KLHL7-AS1</p> | <p>HFE, HMOX1, HSPA9, IL6, MAOA, MTHFR, NOS1, ABCB1, BDNF, SLC6A3, SOD1, SOD2, TNF, GSTP1, DDTIT4, CYP2E1, MAP3K5, NGF, NQO1, AIF1, GSTA4, IGF2, TRPM2, HLA-DRB5, IGF2R, INS, ENO2, FBP1, FCER2, GPX1, HGF, HSPA1A, INSR, MIR181C, MAG, MTA1, BAG5, TCL1B, ADARB2, COL19A1, SLC2A14, EDN1, FGB, CNTNAP2, HBG1, DRAXIN, KCNJ4, MAP2, CEACAM6, NCAPG2, SLC30A10, NECTIN2, RPL6, RPL23A, RPS8, TALDO1, RPL14, PPIAP7, HMGN2P18, RAB25, NUCKS1, RAB29, SIPA1L2, TIAL1, INPP5F, OR5AZ1P, SPATA19, ASS1P14, SLC2A13, RPL30P13, CNTN1, PRICKLE1, CCDC62, GCH1, TMEM229B, RNA5SP397, TPM1, BCKDK, CDH8, NCOR1P2, CRHR1, MGC57346, CRHR1-IT1, SPPL2C, MAPT-AS1, KANSL1, NSF, WNT3, RIT2, CTIF, TMEM163, PHF5GP, LZTS3, DCUN1D1, MCCC1, TMEM175, DGKQ, FAM47E, FAM47E-STBD1, GPRIN3, LHFPL2, LINC01012, BTNL2, HLA-DRB1, HLA-DQB1, FAM126A, GPNMB, LOC101928208, SH3GL2, RPSAP19, KRTCAP2, SLC41A1, RAD1P1, OR5BD1P, MIR4697HG, SYT10, RPS27P21, UBBP4, ACMSD, CERS6, DDRGK1, LAMP3, MMRN1, HLA-DQA1, MTCO3P1, KLHL7-AS1</p> |
| ALL | <p>TAL1, TCF3, TAL2, BAX, PAX5, NBN, NUP214, FLT3, BCR, IKZF1, CDKN2A, ABL1, CRLF2, GATA3, ARID5B, LHPP, CEBPE, OR5AL2P, C14orf119, OR5AL1</p>                                                                                                                                                                                                                                                                 | <p>TAL1, TCF3, TAL2, BAX, PAX5, NBN, NUP214, FLT3, BCR, IKZF1, CDKN2A, ABL1, CRLF2, SH2B3, ARID5B, LIG4, CEBPE, NQO1, ETV6, KMT2A, MTHFR, ABCB1, TP53, XRCC1, RUNX1, ERG, GNB1, HLF, JAK2, SLC19A1, MTRR, NAT2, NOTCH1, CYP2E1, NT5C2, FPGS, CREBBP, P2RY8, CASP8, DUX4, JAK1, EPHX1, EP300, IDH1, JAK3, PAG1, FBXW7, RB1, NSD2, IL7R, CDK6, IKZF3, HOXD4, CYP1B1, IKZF2, ARNT, NOTCH2, VPREB1, CYP1A2, CYP2C8, HCK, PRDM14, SETD2, BLM, GATA3, LHPP, ELK3, CDC20, ELOVL1, OR5AL2P, C14orf119, PYGL, ADAMTS18, TP63, LOC100996325, CSGALNACT1, OR5AL1, FIGNL1, INTS10</p>                                                                                                                                                                                                                                                                                                                                                                                                                                          |
| AML | <p>TGM6, SETBP1, SH3GL1, FLT3, CHIC2, CEBPA, NPM1, WHSC1L1, CBFB, JAK2, NUP214, TERT, MLF1, MLLT10, LPP, GATA2, KRAS, ETV6, DDX41, KIT, RUNX1, NSD1, PICALM, DNMT3A, PTPN11, IDH1, IDH2, NRAS, TP53, WT1, SBDS, CREBBP, KMT2A, SPI1</p>                                                                                                                                                                        | <p>TGM6, SETBP1, SH3GL1, FLT3, CHIC2, CEBPA, NPM1, WHSC1L1, CBFB, JAK2, NUP214, TERT, MLF1, MLLT10, LPP, GATA2, KRAS, ETV6, DDX41, KIT, RUNX1, NSD1, PICALM, DNMT3A, PTPN11, IDH1, IDH2, NRAS, TP53, WT1, SBDS, CREBBP, KMT2A, SPI1, PTPRT, CSF1R, CSF2, CSF3, ERG, FANCB, H1-2, HOXA9, MYC, NUP98, RAD51, BCL2, STAT3, SVIL, TSC2, BAALC, RUNX1T1, RUNX3, CD33, CD44, TNFSF10, FAS, IRF1, NF1, KMT2C, CDK6, PIM2, BCOR, PSIP1, EP300, DAPK1, FOXO1, SETD2, MN1, PVR, EIF4EBP1, EPHX1, ARHGAP26, MET, S100A8, RASGRP1, CUX1, HGF, HSPB1, MALAT1, NOTCH2, ASXL2, SPARC, BRCA1, CD9, ADCY7, CNR2, DHX15, ERCC4, ACSL6, ANXA2, LYL1, ZBTB7A, POU4F1, NECTIN2, DLEU2, CCND2, CEBPD, CST3, FHL2, ANXA5, EHD3, ID2, FANCL, RGS2, S100A10, SPRY4, CBLB, AQP9, SH2B3,</p>                                                                                                                                                                                                                                                  |

|      |                                                                                                                                                                                                                                                                                                                                                                                                                                                                                                                                                                                                                                                                                                                                                                                                                                                                                                                                                                                                                                                                |                                                                                                                                                                                                                                                                                                                                                                                                                                                                                                                                                                                                                                                                                                                                                                                                                                                                                                                                                                                                                                                                                                                                            |
|------|----------------------------------------------------------------------------------------------------------------------------------------------------------------------------------------------------------------------------------------------------------------------------------------------------------------------------------------------------------------------------------------------------------------------------------------------------------------------------------------------------------------------------------------------------------------------------------------------------------------------------------------------------------------------------------------------------------------------------------------------------------------------------------------------------------------------------------------------------------------------------------------------------------------------------------------------------------------------------------------------------------------------------------------------------------------|--------------------------------------------------------------------------------------------------------------------------------------------------------------------------------------------------------------------------------------------------------------------------------------------------------------------------------------------------------------------------------------------------------------------------------------------------------------------------------------------------------------------------------------------------------------------------------------------------------------------------------------------------------------------------------------------------------------------------------------------------------------------------------------------------------------------------------------------------------------------------------------------------------------------------------------------------------------------------------------------------------------------------------------------------------------------------------------------------------------------------------------------|
|      |                                                                                                                                                                                                                                                                                                                                                                                                                                                                                                                                                                                                                                                                                                                                                                                                                                                                                                                                                                                                                                                                | IFI30, MAD2L2, GAS2L1, EHMT2, VSIG4, CTSH, CTSZ, GPR183, LPAR1, ENO2, CBLC, UBE2T, GTF2I, H1-0, ANXA4, ANXA6, GCOM2, AGRN, MX1, ATP1B1, PDE4B, FXYD6, FANCI, ENAH, FANCM, RAD21, RAD51C, BACH2, BLM, SGK1, TCEA2, TRH, TRIO, TUBB2A, XRCC2, PXDN, CTC1, VOPP1, CAPG, CAPN2, CASP7, SLX4, ASMTL, SYNGR1, RPL21P43                                                                                                                                                                                                                                                                                                                                                                                                                                                                                                                                                                                                                                                                                                                                                                                                                           |
| BLCA | HRAS, FGFR3, RB1, KRAS, ATM, CDH1, NQO1, ERCC2, GSTP1, TP53, CDKN2A, TSC1, RNA5SP357, SLC14A1, C19orf12, FAT1P1, CBX6, MIR944, TACC3, CLPTM1L, CWC27, NAT2, CASC8, PSCA, RNA5SP358, CCNE1, RPS11P1, APOBEC3A, P3H2, PSD3, CASC11                                                                                                                                                                                                                                                                                                                                                                                                                                                                                                                                                                                                                                                                                                                                                                                                                               | HRAS, FGFR3, RB1, KRAS, ATM, CDH1, NQO1, ERCC2, GSTP1, TP53, CDKN2A, TSC1, STAG2, KDM6A, PSCA, TACC3, NAT2, CDKN1A, RASSF1, EGFR, MTOR, GPX1, GSTM1, IGF1, CXCL8, MIR145, MMP2, MMP9, MTHFR, MYC, PTGS2, SOD2, TERT, TNF, CLPTM1L, NAT1, IL2, ESR1, FAS, ESR2, MIR100, NOTCH1, SOX2, KLF5, CCNE1, GLI1, MIR29C, MIR99A, ERBB3, TIMP2, TYMP, ERCC4, NOTCH2, HMGN5, KMT2D, GSTZ1, HMGB3, MDM4, POLB, AS3MT, UGT2B7, LOXL4, CSF3, IFNA2, IGFBP3, ARID1A, FERMT2, GSTO2, CREBBP, CYP4B1, IGFBP5, MPO, MT3, PRSS3, SLC19A1, MIR532, HDAC4, MIR4324, EP300, FANCA, BPTF, HOXA9, BIRC3, IFNB1, LIG1, LOXL1, MIR34B, KMT2A, ACHE, MT2A, POR, PPP3CC, BRCA2, TFRC, TRPV1, USP7, BAP1, EOMES, INPP4B, APOBEC3B, SLC12A7, NRSN1, VWA3A, NCAN, ENO2, FANCC, MAPK15, CALHM1, FBXW8, AMFR, PABPC1, SMC1B, ANPEP, OR8S1, AQP3, ISL1, YJEFN3, KRT16, RHOA, ANXA2R, LAMA2, MAGEA9, MT1A, ASAP1, ATP5F1D, ANKFY1, ASXL2, PSMB2, NECTIN2, KMT2C, SRC, MIR33B, PRDM2, TBL1XR1, SMC1A, CHD6, IGSF21, GGH, NCOR1, RALGPS1, ESPL1, RNA5SP357, CLK3, SLC14A1, C19orf12, FAT1P1, CBX6, MYNN, MIR944, CWC27, CASC8, RNA5SP358, RPS11P1, APOBEC3A, P3H2, PSD3, CASC11 |
| BRCA | TSG101, HMMR, ATM, NQO2, AKT1, BRIP1, XRCC3, RB1CC1, PPM1D, RAD54L, FAM175A, NBN, CDH1, CHEK2, BRCA1, BRCA2, BARD1, BCPR, KRAS, TP53, SLC22A18, ESR1, PHB, PALB2, CASP8, RAD51, PIK3CA, ERBB2, PTEN, CAV1, EP300, FGFR2, NOTCH2, CDKN1B, PARP1, NQO1, AKT2, ESR2, FGF3, FGFR1, FLT1, FN1, GATA3, FOXA1, HRAS, IGF1, AR, MDM2, MMP1, NOS2, NOTCH1, ROR1, FBXW7, PTHLH, RB1, STAT1, TBX3, NCOA3, BAP1, FGF4, TRIM33, LOC101928890, EMBP1, MDM4, MLLT10, DNAJC1, ZNF365, ZMIZ1, MAPKAPK5P1, LSP1, PRR33, OVOL1-AS1, MIR3164, LINC01488, IFITM9P, KRT8, USP44, RPL32P28, PAX9, PELI2, RAD51B, THSD4, NTRK3, TOX3, CASC16, FTO, CDYL2, HNF1B, STXBP4, BABAM1, ANKLE1, ELL, LINC01122, LINC01101, ERBB4, TNP1, DIRC3, NRIP1, CYYR1, CYYR1-AS1, MKL1, ITPR1, NEK10, SLC4A7, ADAM29, TERT, FGF10-AS1, RPL26P19, MAP3K1, MIER3, EBF1, CDSN, PSORS1C1, PSORS1C3, HCG27, USP8P1, DHFRP2, FGFR3P1, HLA-S, HCG26, MICB, DDX39B, MCCD1, ATP6V1G2-DDX39B, AIF1, BAG6, EHMT2, C2, TNXB, NOTCH4, C6orf10, BTNL2, HLA-DRA, HLA-DRB9, HLA-DRB1, HLA-DOA1, HLA-DOB1, MTCO3P1, HLA- | TSG101, HMMR, ATM, NQO2, AKT1, BRIP1, XRCC3, RB1CC1, PPM1D, RAD54L, FAM175A, NBN, CDH1, CHEK2, BRCA1, BRCA2, BARD1, BCPR, KRAS, TP53, SLC22A18, ESR1, PHB, PALB2, CASP8, RAD51, PIK3CA, ERBB2, PTEN, CAV1, EP300, FGFR2, NOTCH2, CDKN1B, PARP1, NQO1, AKT2, ESR2, FGF3, FGFR1, FLT1, FN1, GATA3, FOXA1, HRAS, IGF1, AR, MDM2, MMP1, NOS2, NOTCH1, ROR1, FBXW7, PTHLH, RB1, STAT1, TBX3, NCOA3, BAP1, FGF4, GPNMB, IFNB1, ZNF366, PDPK1, PLA2G4A, NCOR1, ADAR, MYH9, SREBF2, ICAM5, MAP3K1, APC2, GRIK2, NRCAM, STARD8, CDKN2A, HOXB13, COL7A1, NOP9, ERBB4, ZNF365, TOX3, MSH6, HADHB, LSP1, MDM4, ABCC1, ARID1B, RAD51B, FTO, ZNF432, CTNNB1, PHGDH, KRT8, RAD51C, CCND1, NCOA1, ERBB3, MTOR, TERT, RNF115, H19, LGR6, PRC1, KCNH1, NRIP1, STXBP4, FGF10, RELA, EXO1, MED12, OLA1, ZMIZ1, DAP3, ATG10, NR2F6, FLACC1, PTPRD, ZC3H11A, NAT2, ABCB6, ADAM10, NDRG1, YAP1, AGR2, SORBS1, HPSE, IL24, UBE2C, CHEK1, NISCH, COMT, CLDN4, CSF1, CSF1R, CSF2, CSF3, CST6, CYP1A1, CYP1B1, CYP2D6, CYP3A4, CYP17A1, CYP19A1, CYP24A1, DNMT1, DNMT3A, DNMT3B, JAG1,                                                                                |

---

|                                                                                                                                                                                                                                                                                                                                                                                         |                                                                                                                                                                                                                                                                                                                                                                                                                                                                                                                                                                                                                                                                                                                                                                                                                                                                                                                                                                                                                                                                                                                                                                                                                                                                                                                                                                                                                                                                                                                                                                                                                                                                                                                                                                                                                                                                                                                                                                                                                                                                                                                                                                                                                                                                                                                                                                                                                                                                                                                                                                                                                                                                                                                                         |
|-----------------------------------------------------------------------------------------------------------------------------------------------------------------------------------------------------------------------------------------------------------------------------------------------------------------------------------------------------------------------------------------|-----------------------------------------------------------------------------------------------------------------------------------------------------------------------------------------------------------------------------------------------------------------------------------------------------------------------------------------------------------------------------------------------------------------------------------------------------------------------------------------------------------------------------------------------------------------------------------------------------------------------------------------------------------------------------------------------------------------------------------------------------------------------------------------------------------------------------------------------------------------------------------------------------------------------------------------------------------------------------------------------------------------------------------------------------------------------------------------------------------------------------------------------------------------------------------------------------------------------------------------------------------------------------------------------------------------------------------------------------------------------------------------------------------------------------------------------------------------------------------------------------------------------------------------------------------------------------------------------------------------------------------------------------------------------------------------------------------------------------------------------------------------------------------------------------------------------------------------------------------------------------------------------------------------------------------------------------------------------------------------------------------------------------------------------------------------------------------------------------------------------------------------------------------------------------------------------------------------------------------------------------------------------------------------------------------------------------------------------------------------------------------------------------------------------------------------------------------------------------------------------------------------------------------------------------------------------------------------------------------------------------------------------------------------------------------------------------------------------------------------|
| DQA2, HLA-DQB2, TAP2, ADGRB3, UST,<br>CCDC170, SEMA3A, ARHGEF5, RPL17P33,<br>HIGD1AP6, NOV, MIR1208, CHCHD4P2,<br>ADIPOR1P1, PHB2P1, SNX32, MYEOV, CCND1,<br>CCDC91, PGAM1P5, UBA52P7, LINC00395,<br>RNA5SP94, GLI2, CYCSP42, MIR4457, MRPS30,<br>GPBP1, HLA-C, RPL3P2, ZDHHC20P2, MICA,<br>PPIAP9, PRRC2A, HLA-DRB5, HLA-DOB,<br>TAB2, LINC00589, HNF4G, ENPP2, LINC00824,<br>RPL36P14 | E2F1, EDNRA, EGF, EGFR, AHR, EPHB4,<br>ESRRA, ETV4, EZH2, F3, FASN, DKK1, FOXM1,<br>SIRT1, FOS, ABL1, SLC39A6, GJA1, PDCD4,<br>GLI1, GPER1, GPX1, GRB7, SETD2, GSN,<br>GSTP1, H2AX, NRG1, HIC1, HIF1A, HMOX1,<br>HRG, HSP90AA1, IFNG, IGF1R, IGFBP5,<br>IGFBP7, APRT, IL1B, IL6, CXCL8, IL10, IDO1,<br>JUN, AREG, MALAT1, KDR, KRT5, STMN1,<br>LEP, LEPR, BCAR4, LOXL2, MIR10B, MIR126,<br>MIR141, MIR145, MIR146A, MIR200B, MIR200C,<br>MIR205, MIR206, MIR214, MIR221, MIR222,<br>MIR29A, MKI67, MMP2, MMP3, MMP9,<br>MMP14, MRE11, MST1, MTHFR, MTR, NHS,<br>NOS3, NOTCH3, NOTCH4, YBX1, PAEP,<br>SERPINB2, PAK1, FOXP3, WWOX, PGR,<br>ABCB1, SERPINB5, PIK3CB, PIN1, PRKAA1,<br>PRKAA2, MAP2K7, KLK10, BAG1, PTGS2, BAX,<br>RAF1, RARA, RARB, BCL2, RECQL, CXCL12,<br>SFRP1, BMP2, SLC2A1, BMP4, SLC5A5, SNAI2,<br>SNAI1, SNCG, SOD2, SPP1, SRC, BRAF, STAT3,<br>STAT5A, AURKA, SULT1A1, ZEB1, TFAP2A,<br>TFRC, TGM2, THBS1, TNF, TOP2A, TP53BP1,<br>TP73, TYMS, VDR, VEGFC, VIM, WT1, XBP1,<br>XRCC2, CXCR4, ADAM12, ARID1A, BCAR3,<br>CAT, TNFSF10, INPP4B, CCNE1, CLDN1,<br>MTDH, ABCG2, BCAR1, APOBEC3B, KEAP1,<br>ZEB2, ETS2, SETBP1, GPI, KIT, KRT14, TXN,<br>L3MBTL3, ALK, BIRC5, TUBB3, PPARGC1B,<br>ADRA1A, CUX1, DHFR, KCNIP3, MIR342, NF1,<br>WNK1, SLC2A5, TEK, PER2, EPOR, SLC01B1,<br>DDX3X, APOBEC3A, FLNA, CADM1, HES1,<br>IKBKB, MIR152, MIF, LEF1, MIR429, EMSY,<br>RPS6KA3, SFRP2, ANKRD30A, CDH5, FST,<br>LAMTOR5, ATF2, FABP4, MIR127, PIM1,<br>PLXNB1, PER3, RASAL2, CD40, CPT1A, ENO1,<br>KRT18, MFGE8, SLC16A3, CD74, NET1,<br>NCOA2, CFL1, SGK3, MIR132, MIR301A, MME,<br>NF2, PER1, DLL4, KDM3A, PTGS1, MIR489,<br>RBM3, MAP2K4, CXCR5, C1QBP, TOP1,<br>TIMELESS, DLEC1, DDIT3, DPYD, HP,<br>ADAMTS1, OCLN, FHL2, JMJD6, FOLR2, GPX4,<br>HOXB9, MIR10A, NEDD4, ATP2A3, PFKFB4,<br>SULF2, BCL2A1, RPS6KB2, CCL20, RAPH1,<br>NR2F1, WNT10B, TFPI2, ABRAXAS1, STC2,<br>LPAR1, DEK, CDKN2C, TACC2, CSNK1D,<br>ECT2, EIF4A2, ELK3, FLNB, GAB1, PRDX5,<br>GPX2, GZMB, LDHB, LHCGR, ACHE, MSI1,<br>MYOD1, PLD2, PLS3, PBRM1, ARRDC3, PTPRC,<br>BCHE, RPS6, FKBPL, CLSPN, SHMT1, NORAD,<br>KMT2D, PDLIM7, FOXQ1, THEMIS2, H6PD,<br>CLCA2, CXCL9, ANGPTL4, ARTN, CTCF,<br>EPB41L3, TGFB2, AKAP9, TENM1, TNIP1,<br>ARFGEF2, CENPF, SLC02B1, CNR2, SRARP,<br>TMPRSS6, DSC3, EFNA1, ERCC6, FBL,<br>MECOM, FABP7, TRIM29, ABCA4, GABRP,<br>GPC1, HDLBP, HHEX, APCS, BIRC2, MAL,<br>MAOA, NFKBIA, OCA2, HDAC7, SERPINE2,<br>BCL11A, RARG, ROBO1, RRAD, CLIP1, SFRP5,<br>BMPR2, SLC35A2, XDH, NAA25, MED28,<br>ADAM33, CUL5, CBFB, ACVR1, AKAP12,<br>HDAC4, CDA, CDC27, LRRC3B, EDNRB, DLL1,<br>HSPA1B, TP53BP2, IBSP, CDH2, PDCD6,<br>SEMA3A, FOXP4, FGD5, DDX10, DES, AFP,<br>ENPEP, EREG, FAAH, EFEMP1, PPM1E, DIP2C, |
|-----------------------------------------------------------------------------------------------------------------------------------------------------------------------------------------------------------------------------------------------------------------------------------------------------------------------------------------------------------------------------------------|-----------------------------------------------------------------------------------------------------------------------------------------------------------------------------------------------------------------------------------------------------------------------------------------------------------------------------------------------------------------------------------------------------------------------------------------------------------------------------------------------------------------------------------------------------------------------------------------------------------------------------------------------------------------------------------------------------------------------------------------------------------------------------------------------------------------------------------------------------------------------------------------------------------------------------------------------------------------------------------------------------------------------------------------------------------------------------------------------------------------------------------------------------------------------------------------------------------------------------------------------------------------------------------------------------------------------------------------------------------------------------------------------------------------------------------------------------------------------------------------------------------------------------------------------------------------------------------------------------------------------------------------------------------------------------------------------------------------------------------------------------------------------------------------------------------------------------------------------------------------------------------------------------------------------------------------------------------------------------------------------------------------------------------------------------------------------------------------------------------------------------------------------------------------------------------------------------------------------------------------------------------------------------------------------------------------------------------------------------------------------------------------------------------------------------------------------------------------------------------------------------------------------------------------------------------------------------------------------------------------------------------------------------------------------------------------------------------------------------------------|

---

---

NCOA6, CIC, PLCB1, ABCB10, ZFYVE26, FUS, CHD5, FBXO8, AMFR, UTS2R, HSD11B1, IRF8, ZNF404, IFNA2, GEN1, ARF1, ARHGDI, LLGL2, MIR101-2, MIR24-2, MAGEA4, MEIS1, MMP10, NUP98, PCDH8, KLK15, GSDMB, RGS2, RPS4X, BGN, SRSF1, ARAP3, MICAL1, SLC2A2, BTK, TCP1, NSD2, EHMT1, NUP214, MFAP5, LIMD2, H4C1, CASP7, ACCS, EIF2S2, MTMR3, CTU1, MAP3K13, REPS2, TCL1B, SYNE1, CRHR1, PDGFA, TRERF1, AKAP8, UBD, LBX1, CFL2, MAGED2, DEPP1, BTN3A2, HELQ, COL11A1, AHS2P, SPATA18, ADHFE1, TICAM1, ZNF569, B3GALNT2, TEK4, DIO3, DMD, DVL3, SUS3, ERCC3, GPC2, DOP1A, MCF2L2, SIK3, COTL1, HEY2, MACF1, KAT6B, NIPBL, APPL1, HEYL, NSMCE2, GRIK3, CXCL3, HLCS, HNRNPK, HNRNPL, HOXA4, ACADM, AQP8, SLC10A6, JAG2, KCNA5, CEP85L, LIPE, MAGEA1, ASL, MT3, NDUF53, NMBR, TAS2R13, MAGEC2, MRPS23, PDZK1, CFP, TREM1, POU2F1, PPA1, RMND1, ELP3, RPRD1A, P3H2, MIR31HG, DHX32, PRODH, GKN1, PRPS1, GALNT16, EPG5, PTPN14, RAC2, RIC8A, RPS9, RXRB, BCORL1, SCP2, MNX1-AS1, BMP1, SIM1, SLAMF1, SLC6A3, TBXA1, UMP5, VEGFB, VWF, WARS1, SMC6, MANEA, SUV39H2, ZNF668, ZNF436, PRRT1, SLC2A10, CLPTM1L, H2BC4, RSPO3, SYNJ2, PRPF4B, HERC2, CCNH, RCCD1, SLC6A5, SLC28A1, TP53I3, SPAG6, ARHGAP11A, SRGAP3, G3BP2, PABPC1, NUDT2, ATP7B, EEF2, CXCL2, EVL, MRPL19, TANK, ZNF667-AS1, SH2D3A, CDH10, ARFRP1, FARP1, HNRNPR, PKDREJ, CDS1, EIF3M, SPTLC1, FAM189B, POP1, TMED1, B4GAT1, CLASRP, ZNF277, WBP4, ABCB8, GALNT5, GPR45, ADAT3, FAM83F, CHRND, SLC22A9, SORCS1, OSBPL11, FCRL3, AGAP2, SCGB3A2, CLCN1, CLIC1, DNAJC24, EFCAB13, FAM210A, CNGA2, NLRP8, WDR88, KLHDC7A, C1orf87, TMEM125, COL19A1, FAM131A, METTL6, RTP1, DNAJC21, UBLC1, CD109, MPLKIP, RALYL, OR1N1, CRX, CRYAA, ABHD12B, UNC45B, CST4, ANKRD29, DTX3L, TAF4A, VPS13B, MAMDC4, USP54, DGKG, GPR180, DBN1, DAW1, XIRP1, GIMAP1, ADAMTS19, DNAH9, DNASE1L3, DPAGT1, EEF1B2, DTX3, EIF5, CELA1, NUDT17, ABCA3, ZNF25, ZNF438, SLC39A12, NSUN6, ADGRF4, KIF6, RNF182, PXDC1, FKTN, BEND7, ALDOA, NID2, FRMPD1, TRAPPC8, CCT5, KLHDC10, SPEN, TBC1D9B, COLGALT2, GGA3, ZCCHC14, RGL1, SYNE2, ASTN2, EHB1, VPS39, UBR4, HEY1, ZNF281, STX12, ZNF318, HEPACAM2, G6PC, SNX32, GABRA4, MAP7D2, HEATR9, CATSPERE, ALS2CL, BOD1L1, SIPA1L1, GGA1, TOR1AIP1, RIBC2, IL1RAPL2, ARFGAP3, CNNM4, DAZAP1, GDF10, PGBD3, TRMT2A, CLUL1, CNTN6, GOLIM4, UTP20, GNAI2, GOLGB1, JAKMIP3, NPBWR1, CDH20, OTOGL, EXOC3L1, CAVIN1, ANKRD34A, RNF149, ANK1, ANK2, MRPS28, MRPL13, GRIN2D, GRM6, GTF2A1, GUCY1A2, GUCY2F, PURG, H1-2, PIK3R4, HK3, H2AC21,

---

---

HOXA3, HOXD11, KRTAP20-1, KRTAP21-1, NLRP9, NLRP14, ZNF546, TRIML1, TREML1, SP110, KCNT2, APOC4, IGBP1, CTU2, WDR53, SHROOM2, ITGA9, ARAF, EIF6, SPATA21, MROH7, C5orf34, KCNJ1, KCNJ15, KPNA5, KRTAP10-8, LINC00671, C4orf50, GFRAL, KTN1, LAMA2, LGALS2, LLGL1, PLEKHD1, PRICKLE3, HAPLN4, YY2, MAN2C1, MIA2, AFF1, MIR345, MYH1, PPP1R12B, NDUFA2, NDUFA3, NDUFA8, LRRC37A2, NFYC, ACO2, SMARCAL1, ITSN2, ARHGEF4, CUTC, MRPS7, TRAPPC12, CYB5R4, HSPA14, NME8, KRT76, HOOK1, PDE2A, NIP7, ANAPC5, PHF7, PPHLN1, CPSF3, PADI3, INPP5K, SIX4, ATP8B1, PHKB, ATP6V0B, PLOD1, PNLIPRP1, POLH, POLR2F, SEMA5B, NLE1, SMOX, GNB1L, UGT1A9, ARHGEF38, TMEM161A, OXSM, PPP1R3A, MAGOHB, ZDHHC4, RIF1, ZNF532, SBNO1, UQCC1, PACC1, TMEM39A, STRBP, AVPR2, MTMR8, KIF16B, N4BP2, ZFP64, NUP133, PCDHGB6, PCDHB15, MOSPD1, PRRG1, PANX2, FEM1C, CMC2, MRPS22, SLC17A6, MCOLN1, KIAA1324, LRRC7, PDZD4, ZSWIM5, MAGEE1, WFDC1, NECTIN2, OSTC, ACTA2, RANBP1, RAP1GAP, RASGRF2, RFC4, RFX2, RHD, TRMT11, RPL23A, RPL31, RPLP2, RPS7, RPS8, SCNN1B, ANKEF1, FAM217B, KANSL1-AS1, C16orf58, FNDC3B, PCDH20, SKIV2L, MRPL9, SLC8A3, SLC9A2, SMARCD1, SORL1, SPAST, SPTAN1, STAT4, STX5, SURF1, VPS72, TECTA, TESK1, THBS3, TLE3, TLL1, TSPAN4, C1QB, TNS1, TPM4, TPTE, TRPC4, TTC3, UPK1B, ZNHIT2, ZNF22, ZNF75A, FASTKD3, PRRC2A, HSD17B8, DYNC2H1, TXNDC15, LONRF3, ZBTB3, RUFY1, CUBN, WDCP, PUS1, FXR1, CFHR5, TSC22D4, OR12D3, DYSF, EOMES, FCRL5, TCF7L1, DDX59, COG3, INHBE, TFAP2D, OBSCN, FSCB, ZNF644, NLRC5, ZNF541, SYT3, NOA1, HOOK3, LZTS2, KBTBD8, PLEKHA8, MFSD9, TMEM25, TMTC4, ELP1, H2BC12, DGKE, DDO, MICALL1, APOL1, THOC5, SSNA1, DDX18, TAX1BP1, AP1M1, KALRN, MACIR, STPG1, SLC7A7, MAP3K6, SPOCD1, SCARF2, INA, LMF2, RRP9, CD2, RASL10B, BOC, ALKBH8, SLC25A51, LRRFIP1, ATP6AP1L, LDHAL6B, MED14, TRMT10A, OTOF, PIGS, ARHGAP29, AKAP6, ACY1, PPM1F, ZNF646, ACAP1, CTIF, LRBA, LRRC37A, RCE1, MIR6808, PEX14, TRIM33, LOC101928890, EMBP1, ZBED6, MLLT10, DNAJC1, MAPKAPK5P1, TCF7L2, PRR33, OVOL1-AS1, MIR3164, LINC01488, IFITM9P, PKNOX2, RPS27P20, USP44, FRY, RPL32P28, RNY1P8, PAX9, PELI2, CCDC88C, THSD4, NTRK3, CASC16, CDYL2, HNF1B, PCAT18, BABAM1, ANKLE1, ELL, KCNN4, WDR43, LINC01122, RALB, LINC01101, TNP1, DIRC3, RPS2P1, CYR1, CYR1-AS1, EMID1, MKL1, ITPR1, NEK10, SLC4A7, ADAM29, FGF10-AS1, RPL26P19, MIER3, ARRDC3-AS1, EBF1, RANBP9, DHX16, CDSN, PSORS1C1, POU5F1, PSORS1C3, HCG27, USP8P1, WASF5P, DHFRP2, FGFR3P1, HLA-S, HCG26, MICB, DDX39B, MCCD1, ATP6V1G2-DDX39B, AIF1,

---

|       |                                                                                                                                                                                                                                                                                                                                                   |                                                                                                                                                                                                                                                                                                                                                                                                                                                                                                                                                                                                                                                                                                                                                                                        |
|-------|---------------------------------------------------------------------------------------------------------------------------------------------------------------------------------------------------------------------------------------------------------------------------------------------------------------------------------------------------|----------------------------------------------------------------------------------------------------------------------------------------------------------------------------------------------------------------------------------------------------------------------------------------------------------------------------------------------------------------------------------------------------------------------------------------------------------------------------------------------------------------------------------------------------------------------------------------------------------------------------------------------------------------------------------------------------------------------------------------------------------------------------------------|
|       |                                                                                                                                                                                                                                                                                                                                                   | BAG6, EHMT2, C2, CFB, NLF, TNXB, C6orf10, HNRNPA1P2, BTNL2, LOC101929163, HLA-DRA, HLA-DRB9, HLA-DRB1, HLA-DQA1, HLA-DQB1, MTCO3P1, HLA-DQA2, HLA-DQB2, TAP2, HLA-DMB, ADGRB3, RPL17P25, UST, CCDC170, ARHGEF5, RPL17P33, HIGD1AP6, NOV, MIR1208, CHCHD4P2, MXRA8, ADIPOR1P1, PHB2P1, MYEOV, TMEM45B, CCDC91, PGAM1P5, UBA52P7, LINC00395, MARK2P12, AQP4, RNA5SP94, INHBB, GLI2, XPOTP1, CYCSP42, MIR4457, MRPS30, SETD9, GPBP1, RAB5CP2, FOXF2, MCUR1, HLA-C, RPL3P2, HLA-B, ZDHHC20P2, MICA, PPIAP9, HCG23, HLA-DRB5, HLA-DOB, FAM46A, TAB2, LINC00589, HNF4G, ENPP2, LINC00824, RPL36P14                                                                                                                                                                                           |
| BRNCA | ERBB2, BRCA2, TP53, PTEN, IDH2, IDH1, POT1, PPARG, ALK, RTEL1, RTEL1-TNFRSF6B, TERT, SEC61G, CDKN2B-AS1, ZBTB16, LOC101928875, PHLDB1, RPL10P13, POLR2A, LINC00977, MIR3686, EGFR, PHLDA1, GSDMC                                                                                                                                                  | ERBB2, BRCA2, TP53, PTEN, IDH2, IDH1, POT1, PPARG, ALK, EGFR, BRAF, CTNNB1, CDKN2A, MGMT, VEGFA, CDK4, CCND1, SOX2, IL2, SPP1, YAP1, HRAS, PON1, CYP2C9, SIRT1, PCNA, PTCH1, RELA, S100B, SOD2, TGM2, EML4, IQGAP2, DTX2, AMOT, DAPK1, FJX1, DLL1, ITGB2, HES5, NRARP, SMO, TGFB2, IQGAP1, POLR3B, RTEL1, RTEL1-TNFRSF6B, TERT, SEC61G, CDKN2B-AS1, ZBTB16, LOC101928875, PHLDB1, RPL10P13, ETFA, POLR2A, LRRC31, LINC00977, MIR3686, CDKN2B, PHLDA1, GSDMC                                                                                                                                                                                                                                                                                                                            |
| CERV  | FGFR3, MICA, HLA-DRB1, HLA-X, HLA-DQA1                                                                                                                                                                                                                                                                                                            | FGFR3, ZBP2, EXOC1, RNA5SP173, MICA, HLA-DRB1, ZNF70P1, GSDMB, LINC00290, HLA-X, HLA-DQA1, HCG25                                                                                                                                                                                                                                                                                                                                                                                                                                                                                                                                                                                                                                                                                       |
| CHLCA | IDH1, TP53, KRAS                                                                                                                                                                                                                                                                                                                                  | IDH1, TP53, KRAS, IDH2, RNF43, EGFR, ERBB2, FGFR2, IL6, PTGS2, BAP1, BRAF, SMAD4, PBRM1, ARID1A, PTEN, GNAS, MSLN, PRKACB, NOS2, PTPN3, SLC5A5, PEG3, PRKACA, KMT2C, ROBO2                                                                                                                                                                                                                                                                                                                                                                                                                                                                                                                                                                                                             |
| CLL   | TP53, ATM, PLCG2, POT1, IGHV3-21, ID3, ACTA2, FAS, FAS-AS1, TSPAN32, C11orf21, MIR4301, GRAMD1B, BMF, MNS1, RPLP1, RPL10AP12, PHLPP1, BCL2, ACOXL, LOC400997, BCL2L11, CFLAR, CFLAR-AS1, SP110, SP140, FARP2, EOMES, ULK4, SDHDP3, IRF4, HLA-DRB1, BAK1, SRRM1P1, MDS2, TMPS5, BUB1B, ZNF280D, GEMIN8P1, IRF8, CMC1, TERC, EXOC2, HLA-DQA1, CCAT1 | TP53, ATM, PLCG2, POT1, IGHV3-21, P2RX7, SF3B1, IRF4, LEF1, BCL2, BRAF, XPO1, SP140, BMF, PRKD2, ACOXL, FARP2, QPCT, C11orf21, BIRC3, IL6, ITGA4, MYC, PIK3CA, CCND1, BCL6, SYK, BTK, CD5, RPS15, PMAIP1, IKZF3, MTHFR, TERC, TNFRSF11A, ARL11, PTGS2, TNFSF11, MIR143, U2AF1, CDKN2B-AS1, TOPBP1, LILRA4, IL19, IGHG1, MIR145, NFKBIE, POLB, PPP2R5C, RBL2, SRSF2, CPEB1, VDR, ZRSR2, KLRC4, ID3, RHOU, ACTA2, FAS, FAS-AS1, ASCL2, TSPAN32, MIR4301, GRAMD1B, MNS1, RPLP1, RPL10AP12, IRF8, PHLPP1, DTNB, LOC400997, BCL2L11, CFLAR, CFLAR-AS1, CASP8, SP110, ODF3B, EOMES, ULK4, NCK1, SDHDP3, MYNN, BANK1, CAMK2D, TERT, HLA-DRB1, HLA-DQA1, BAK1, OPRM1, IPCEF1, GPR37, SRRM1P1, UBA52P6, MDS2, TMPS5, BUB1B, ZNF280D, GEMIN8P1, CMC1, TERC, ARSJ, EXOC2, HLA-DQB1, CCAT1, DMRTA1 |
| CML   | SETBP1, BCR, TUFMP1, RPL34P31                                                                                                                                                                                                                                                                                                                     | SETBP1, BCR, TUFMP1, RPL34P31                                                                                                                                                                                                                                                                                                                                                                                                                                                                                                                                                                                                                                                                                                                                                          |
| CRCA  | MT-CO1, BUB1B, MLH3, BAX, PDGFR, CTNNB1, AKT1, ODC1, AXIN2, RAD54B, PIK3CA, NRAS, DCC, AURKA, DLC1, FLCN, TRIM28, PLA2G2A, EP300, FGFR3, TP53, CCND1, PTPN12, MCC, KAT5, TLR2, BRAF, TLR4, APC, PTPRJ, MLH1, MSH2, CHEK2, SMAD3, SMAD4, MMP2, TCF7L2, BUB1, KLF5,                                                                                 | MT-CO1, BUB1B, MLH3, BAX, PDGFR, CTNNB1, AKT1, ODC1, AXIN2, RAD54B, PIK3CA, NRAS, DCC, AURKA, DLC1, FLCN, TRIM28, PLA2G2A, EP300, FGFR3, TP53, CCND1, PTPN12, MCC, KAT5, TLR2, BRAF, TLR4, APC, PTPRJ, MLH1, MSH2, CHEK2, SMAD3, SMAD4, MMP2, TCF7L2, BUB1, KLF5,                                                                                                                                                                                                                                                                                                                                                                                                                                                                                                                      |

---

|                                                                                                                                                                                                                                                                                                                  |                                                                                                                                                                                                                                                                                                                                                                                                                                                                                                                                                                                                                                                                                                                                                                                                                                                                                                                                                                                                                                                                                                                                                                                                                                                                                                                                                                                                                                                                                                                                                                                                                                                                                                                                                                                                                                                                                                                                                                                                                                                                                                                                                                                                                                                                                                                                                                                                                                                                                                                                                           |
|------------------------------------------------------------------------------------------------------------------------------------------------------------------------------------------------------------------------------------------------------------------------------------------------------------------|-----------------------------------------------------------------------------------------------------------------------------------------------------------------------------------------------------------------------------------------------------------------------------------------------------------------------------------------------------------------------------------------------------------------------------------------------------------------------------------------------------------------------------------------------------------------------------------------------------------------------------------------------------------------------------------------------------------------------------------------------------------------------------------------------------------------------------------------------------------------------------------------------------------------------------------------------------------------------------------------------------------------------------------------------------------------------------------------------------------------------------------------------------------------------------------------------------------------------------------------------------------------------------------------------------------------------------------------------------------------------------------------------------------------------------------------------------------------------------------------------------------------------------------------------------------------------------------------------------------------------------------------------------------------------------------------------------------------------------------------------------------------------------------------------------------------------------------------------------------------------------------------------------------------------------------------------------------------------------------------------------------------------------------------------------------------------------------------------------------------------------------------------------------------------------------------------------------------------------------------------------------------------------------------------------------------------------------------------------------------------------------------------------------------------------------------------------------------------------------------------------------------------------------------------------------|
| MSH6, IGFBP3, KDR, KRAS, ABCB1, POLD1, POLE, RET, STK11, DPYD, TYMS, RNA5SP299, NKX2-3, CYP17A1, FGFR2, MYRF, MIR3164, POLD3, SPSB2, ETV6, KRT8, BRCA2, GREM1, LOC100131315, HNF1B, SMAD7, MIR4758, CABLES2, RPL26P19, C5orf66, LINC00536, UTP23, CCAT2, LINC00709, SLC25A28, MYEOV, RPS21, MAP3K1, EIF3H, RAD21 | MSH6, IGFBP3, KDR, KRAS, ABCB1, POLD1, POLE, RET, STK11, DPYD, TYMS, NAMPT, SLCO1B3, EYA4, SYNE1, ABCA1, EVL, LGR6, TCERG1L, ABCB5, IL6ST, DACT1, PRKD1, CD109, HAPLN1, RNF182, GREM1, GUCY1A2, SMAD7, COX1, COX2, MUTYH, PMS2, SH3TC1, PPARG, PRKCE, PTPRD, BMP4, TGFBI, CDH1, EGFR, ARID1A, GNAS, CCND2, RHPN2, FEN1, POLD3, VTI1A, LPAR1, LRP1, TET2, HHIP, SLCO2A1, TMEM238L, LAMC1, CUBN, BOC, YAP1, CHD1, WIF1, PARP1, CYP1A2, CYP1B1, NQO1, TYMP, ERCC2, ESR2, ALDH2, SATB2, FN1, GSTM1, GUCY2C, IGF2, CXCL8, FADS1, SMAD2, SMAD9, MMP1, ABCC1, CYTB, MTHFR, ND4L, MYC, NME1, LEF1, KRT20, RNF43, FBXW7, ZMIZ1, PTEN, PTGS2, BCL2, SFRP1, SFRP2, NXN, SPARC, SRC, TGFBRI, TGFBRII, TNF, XRCC1, TFPI2, CALR, CASP8, LGR5, TNFSF10, PROM1, DCLK1, MTDH, FADS2, ABCG2, ADH1B, BIRC5, MTRR, NTHL1, WNK1, TGM2, TIAM1, ATG5, CSF2, EPHA1, BMP2, TNFSF13, ZEB2, RRM2, SOD2, CDO1, CSE1L, FPGS, IDH1, MIR106B, MIR26B, MPO, ING4, TLR9, PRKCB, AKR1B10, GGH, EXO1, KL, AKAP12, KLF2, STRAP, DHFR, MIR93, MMP11, ACKR3, KMT2C, SLC19A1, TK1, WRN, GALNT12, ABCC3, UMPS, MIR1271, AKAP9, ABCC2, GATA5, EPHA3, FAT1, FOLH1, AMACR, GAPDH, CHD5, MIR130B, MKI67, NR4A2, PPP2R1B, PRKCZ, RPS6KB1, SELENOP, BMPRI1A, TFRC, ZNF217, SESN2, ATAD1, TP63, ABCB6, PTPRU, TENM1, APC2, POSTN, CFTR, CAPN10, CPE, PRIMA1, CYP2A6, BRINP1, DPEP1, EPHB6, ACSL4, EFEMP1, TPX2, LAMA1, PYCARD, IFNA1, LIFR, ARNT, PER1, XAF1, RTN4, SFRP4, SRSF6, TCF3, TCN2, PDGFD, IRS4, TNS4, EIF3H, SELENBP1, RASAL2, RASSF2, ABCC5, ABCC4, MCERS1, GPNMB, CACUL1, CTNND2, CUX1, ADAMTS15, SLC29A1, EPHA7, ERCC6, NTNG1, ABCA4, MTHFD1L, GATA4, GPX4, GSTM3, GTF2B, ACACA, VWA2, NME2, P2RX7, NUSAP1, ACSL5, SERPINB5, ASAP3, PRPS1, SLC12A5, PTPRS, SOX17, SCG5, CENPH, BMP6, TBX1, CAD, ZKSCAN3, FZD4, CD9, DHRS2, SF3A1, CD226, CHL1, PTPRT, CSMD3, UHRF2, LRRC3B, COL3A1, ADORA1, CTBP1, DDIT3, ADAMTS18, DPYSL2, EIF4G1, F5, FBLN2, FBN2, CD93, ACIN1, ZNF292, GSE1, VPS13A, ABCB10, LY96, SETBP1, TTLL3, GHRHR, GLI3, GRIN2A, BRF1, HDC, HK3, HRH1, APOB, IFNA2, TNFRSF9, LIG3, LRP2, CD46, NR3C2, NF1, NFATC1, SLC11A2, NRCAM, SDF4, PCSK2, ABCB4, PKHD1, ATP7B, TRPM7, ODAM, PRSS1, CD248, ADAMTSL3, RARB, RASGRF2, GNB4, RHEB, SFRP5, SKIV2L, FOXL2, TXNRD1, UNG, UQCRC2, KDM6A, ST8SIA4, ANP32A, OBSCN, CDC14A, RUNX1T1, ADAM19, LDB1, FOXH1, NEURL1, CABLES1, OTOP2, DMKN, PPP1R14A, NCR1, QKI, HOXD9, RASL11A, MAF, PAX8, CDH5, MIR1273C, LINC00673, CDH7, PQBP1, CALCOCO2, EFS, BCAS2, TFG, ABCA10, ABCA9, ABCA8, CORO2B, ZNHIT1, UNC13B, ADARB2, ARFGEF1, AKAP3, GNB5, |
|------------------------------------------------------------------------------------------------------------------------------------------------------------------------------------------------------------------------------------------------------------------------------------------------------------------|-----------------------------------------------------------------------------------------------------------------------------------------------------------------------------------------------------------------------------------------------------------------------------------------------------------------------------------------------------------------------------------------------------------------------------------------------------------------------------------------------------------------------------------------------------------------------------------------------------------------------------------------------------------------------------------------------------------------------------------------------------------------------------------------------------------------------------------------------------------------------------------------------------------------------------------------------------------------------------------------------------------------------------------------------------------------------------------------------------------------------------------------------------------------------------------------------------------------------------------------------------------------------------------------------------------------------------------------------------------------------------------------------------------------------------------------------------------------------------------------------------------------------------------------------------------------------------------------------------------------------------------------------------------------------------------------------------------------------------------------------------------------------------------------------------------------------------------------------------------------------------------------------------------------------------------------------------------------------------------------------------------------------------------------------------------------------------------------------------------------------------------------------------------------------------------------------------------------------------------------------------------------------------------------------------------------------------------------------------------------------------------------------------------------------------------------------------------------------------------------------------------------------------------------------------------|

---

---

ALDH1L1, DSTN, ADAM29, ERI2, TP53TG1, ADCY8, SLC22A9, OMA1, C8orf34, CSNK1A1L, SPACA7, B4GALNT2, CYB5D2, NLRP8, KDF1, CNTN1, COL4A6, COL7A1, CPO, EVC2, ZNF572, ADORA3, FRMPD2, SYT9, PHETA1, ZNF480, ZNF560, ZNF569, ABCC13, PUS10, CTSH, C2CD6, WDR49, CNTN4, JAKMIP1, ABCA13, IQUB, ERICH1, ZNF540, LONRF2, DEFA4, UGT3A2, HTR3C, DLG3, DMD, DNAH8, DNASE1L3, DPAGT1, EDA, VSTM4, SPAG17, AMZ2P1, SPNS3, PDILT, ABCA3, ETFDH, ETV1, FANCG, AMER2, GJD4, FCN1, FCN2, FERD3L, ITPRID1, ABCD2, FHL3, TFEC, PPM1E, CNKSR2, DIP2C, KDM2A, SNRNP200, MCF2L2, NCDN, LPIN1, FLNC, CAMSAP2, AGTPBP1, KCNH4, ABCA6, ABCA5, CBX5, PIK3R5, RAB38, NPAP1, EML2, TTLL10, GABPB1, GABRA6, FBXL2, GALNS, ZZZ3, RPAP1, EDRF1, ABCA12, CABYR, SACS, AMPD1, CNPPD1, SIGLEC7, SDCBP2, CPAMD8, SALL3, PCDH11X, STK32C, NPBWR2, ACTL9, ATP11C, ANK2, GRID1, GRID2, GRIK3, GRM1, SNX8, ANAPC4, PDZRN4, DONSON, H1-4, H1-5, NT5C, KRT73, HOXC9, HOXD1, HTR5A, CD300E, IPP, ISLR, ABCC6, KCNA10, KCND3, KRTAP10-8, CCDC9B, CFAP77, LAMB3, LIG1, C12orf76, LMO7, AMTN, MAP1B, MAP2, MYO1B, NDUFA1, NELL1, NID1, NODAL, OSBP, OVGP1, SHANK1, TBX22, AMDHD2, TNNI3K, ZDHHC2, ELOA2, PAIP2, WAC, WNT16, CINP, PEX5L, ERGIC3, PEG3, PGM1, ATP6V1E1, PKNOX1, PMM2, GPR87, TSPEAR, SETD4, ETAA1, CCDC93, ZNHIT6, PPOX, PHIP, ARHGEF10L, PANK4, VRTN, TMEM140, SLC22A15, PRG2, DNAH3, ZDHHC7, MFN1, INTS13, CCAR1, SCN3B, HR, PROS1, KCNQ5, PSMA2, FSTL5, PAK6, MFF, PSMC5, RNPEPL1, CORO1B, JPH3, DSCAML1, LRRC47, NLGN4X, ZNF624, ZNF471, RELCH, VPS18, PTPRN2, ABCD3, ABCD4, PZP, RAB5C, RALGDS, HIVEP3, RBP3, RCN1, TSKS, EXOC4, ABCE1, RPL6, SCNN1B, SCNN1G, DUSP21, DMRTA1, CLSTN2, LRRC4, NCAPG, MS4A5, CHST8, GMCL2, CDH22, ARAP3, PLPPR2, BCL11B, SLC26A10, SLC1A7, SMTN, SLC01A2, BOLL, SNRNP2, SORL1, SPTBN2, ZFP36L2, CDKL5, SULT2B1, ABCC8, TCOF1, ICAM5, TUBB2A, ZBTB8B, WNT8B, ZNF43, MKRN3, ZNF155, ZNF232, DNALI1, CACNB1, CACNB2, CYREN, GDAP1L1, ZSCAN5A, RIC3, PARP8, ZNF385D, MMRN2, ZNF442, CSRN3, CEBPA-DT, SLC66A2, PREX2, STAM, BPIFB2, TRAF3IP3, ZSCAN16, PBX4, SLC44A4, MLF2, LAS1L, RBM10, CAPN6, GFI1B, H2BC14, OR1E2, FBXO30, TOMM40L, TMEM164, HPS3, LZTS2, CCDC62, PIGO, LMNB2, IGSF21, HAT1, CCNB3, CBFA2T3, DCHS1, ABCB11, MCM3AP, KALRN, FAM110B, ARHGEF1, ZNF804A, MYLK3, SLC33A1, ZMYM4, DSEL, KCNB2, OLFM2, NDST3, SFXN1, AKAP6, MYOT, ABCG1, PPM1F, ZNF432, ACAP1, CLSTN3, STARD8, JAKMIP2, PAN2, P2RY14, MIR6808, DUSP10, GATA3, RNA5SP299, NKX2-3,

---



|        |                                                                                                                                                 |                                                                                                                                                                                                                                                                                                                                                                                                                                                                                                                                                                                                                                                                                                                                                                                                                                                                                     |
|--------|-------------------------------------------------------------------------------------------------------------------------------------------------|-------------------------------------------------------------------------------------------------------------------------------------------------------------------------------------------------------------------------------------------------------------------------------------------------------------------------------------------------------------------------------------------------------------------------------------------------------------------------------------------------------------------------------------------------------------------------------------------------------------------------------------------------------------------------------------------------------------------------------------------------------------------------------------------------------------------------------------------------------------------------------------|
|        |                                                                                                                                                 | CYP17A1, FGFR2, MYRF, MIR3164, COLCA2, COLCA1, RPL18P9, SPSB2, ETV6, RPL7P40, DIP2B, KRT8, SH2B3, FRY, BRCA2, RPS3AP46, RAD51B, LOC100131315, TMC3, HNF1B, BABAM1, FGFR3P3, RPS2P1, PREX1, CYP24A1, LAMA5, MIR4758, CABLES2, GPR143, NEK10, RPS27P4, MTHFD2P4, TERT, RPL26P19, C5orf66, MIR3925, ELOVL5, SLC22A3, LINC00536, UTP23, CCAT2, MXRA8, QRSL1P2, LINC00709, SLC25A28, MYEOV, PSMC1P8, ATF1, MIR5580, MEX3B, CASC20, XPOTP1, PFDN4, RPS21, SHROOM2, MRPS31P1, TOMM22P4, MAP3K1, PANDAR, RAD21                                                                                                                                                                                                                                                                                                                                                                              |
| DLBCL  | EZH2, MYD88, PIK3CD, CARD11, CD79B, IRF4, PVT1, MIR1208, EXOC2, LINC00824                                                                       | EZH2, MYD88, PIK3CD, CARD11, CD79B, CD79A, CDKN2A, MALT1, ALK, CD274, MYC, ABCB1, PIK3CA, PIK3CB, PIK3CG, BCL2, PRDM1, CREBBP, EP300, JAK2, FAS, FOXO1, GLI1, B2M, KMT2D, ABCG2, CDK2, GNA13, RPS6KB1, STAT6, IKZF1, IRF8, NOTCH2, SKP2, FBXO11, CDK1, CLTC, PDPK1, PRDM11, NECTIN2, RANGAP1, SGK1, SOD2, BCAS2, PRDX4, TXNIP, PRDX3, SEC31A, SPEN, NOM1, SOD3, TRAF5, CCDC86, IMMP2L, CAT, IRF4, HLA-B, MIR6891, PVT1, MIR1208, EXOC2, LINC00824                                                                                                                                                                                                                                                                                                                                                                                                                                   |
| FLYMPH | EZH2, BCL2, SETP16, MIR6090, HCG22, HLA-DRB9, HLA-DQB1, CXCR5, FLI1, C6orf15, HLA-DRB5, MTCO3P1                                                 | EZH2, BCL2, HLA-DRB1, BCL10, IGH, BCL6, CREBBP, KMT2D, TNFRSF14, MTHFR, KDSR, MTR, RRAGC, TYMS, MYD88, ATP6V1B2, TNFAIP3, EBF1, IFNA2, ATP6AP1, SETP16, GRAMD1B, MIR6090, PHLPP1, LPP, HCG22, HLA-DRB9, HLA-DQB1, CXCR5, FLI1, C6orf15, HLA-DRB5, MTCO3P1                                                                                                                                                                                                                                                                                                                                                                                                                                                                                                                                                                                                                           |
| HANC   | PTEN, TNFRSF10B, EGFR, ING1, ING3, ADH1B, ADH7                                                                                                  | PTEN, TNFRSF10B, EGFR, ING1, ING3, TP53, FGFR2, PIK3CA, PIK3CB, BCL2, VEGFA, RAD51, ERBB3, XRCC3, CDKN2A, ERBB2, GPX1, MAPK1, TGFA, DPYD, FANCD2, RARB, BCL2L1, CSF3, FAT1, AREG, MAL, TYMS, UROD, BAP1, CEBPA, CYLD, FGFR1, PRAME, GRP, MAPK3, STAT6, CDC73, APOBEC3B, FANCA, FANCC, FANCE, FANCB, FANCF, FANCG, FANCL, FANCI, FANCM, BRIP1, TP63, ADH1B, ADH7                                                                                                                                                                                                                                                                                                                                                                                                                                                                                                                     |
| KDNCA  | FLCN, DIRC2, HNF1B, VHL, HNF1A, RNF139, OGG1, PRCC, MET, EPAS1, PTEN, SETD2, PBRM1, PTGS2, MTOR, TSC1, KDM5C, BAP1, LOC102724265, MIR1204, PVT1 | FLCN, DIRC2, HNF1B, VHL, HNF1A, RNF139, OGG1, PRCC, MET, EPAS1, PTEN, SETD2, PBRM1, PTGS2, MTOR, TSC1, KDM5C, BAP1, NF2, MITE, PIK3CA, TFE3, TP53, ELOC, SLC49A4, KEAP1, ERBB2, ALK, GJB1, GSTM1, GSTT1, IL6, KRT7, TGM2, TNFSF10, ADIPOQ, SCARB1, KDR, TSC2, FLT1, GSTP1, BIRC7, MAPK8, SLC2A1, IL13, DAPK1, KDM6A, ARID1A, BIRC5, APAF1, ANXA4, APRT, L1CAM, POMC, PVALB, SFRP2, ATM, ALOX5, HSPB1, IFNA2, IL4R, PAK1, SOD2, ALDH1A1, FLT4, KRT8, TMEM127, RELA, TEK, NDRG1, BTG3, CRABP1, ACHE, PGK1, BCHE, CASP2, UNC5C, ACY1, PRAME, HSPD1, MUC4, PEBP1, DCLK3, CPQ, AKAP13, CSMD3, LRRK2, CNN2, CRYAB, ASB15, DNHD1, CTSB, CTSD, FAAH2, EEF2, ALAD, PDXDC1, SYNE2, ALOX12B, YIPF3, PNKD, OR4C13, VMO1, GRB7, HARS1, HSPA9, MSGN1, IL6R, FAM111B, KCNMA1, KRT32, LDHB, M6PR, SHANK1, PDHB, LRP1B, TET2, PIDD1, AP5M1, FMN2, SPTBN4, RYR1, SLC5A3, AHNAK, MLLT10, LMAN2L, CAPG, |

|       |                                                                                                                                                                                                                                                                                                                                                                                                                                                                                                                                                                                                                                                                                                                                                                                                                                                                                                                                                                                                                                                                                                                                                                                                                                                                                                                                                                                                                                                                                                                                                                                                                                                                                                                                                                                                                                                                                                                                                                                                                                                                                                                                                                                        |                                                                                                                                                                                                                      |
|-------|----------------------------------------------------------------------------------------------------------------------------------------------------------------------------------------------------------------------------------------------------------------------------------------------------------------------------------------------------------------------------------------------------------------------------------------------------------------------------------------------------------------------------------------------------------------------------------------------------------------------------------------------------------------------------------------------------------------------------------------------------------------------------------------------------------------------------------------------------------------------------------------------------------------------------------------------------------------------------------------------------------------------------------------------------------------------------------------------------------------------------------------------------------------------------------------------------------------------------------------------------------------------------------------------------------------------------------------------------------------------------------------------------------------------------------------------------------------------------------------------------------------------------------------------------------------------------------------------------------------------------------------------------------------------------------------------------------------------------------------------------------------------------------------------------------------------------------------------------------------------------------------------------------------------------------------------------------------------------------------------------------------------------------------------------------------------------------------------------------------------------------------------------------------------------------------|----------------------------------------------------------------------------------------------------------------------------------------------------------------------------------------------------------------------|
|       |                                                                                                                                                                                                                                                                                                                                                                                                                                                                                                                                                                                                                                                                                                                                                                                                                                                                                                                                                                                                                                                                                                                                                                                                                                                                                                                                                                                                                                                                                                                                                                                                                                                                                                                                                                                                                                                                                                                                                                                                                                                                                                                                                                                        | TAGLN2, CARD11, CRADD, FPGT, INPP4B, NAV3, RPL14, ZNF765, NLRP12, ZNF804A, ZNF536, CUL7, MERTK, ERN1, CILK1, ROR1, MYO3A, RIOK2, CDK15, WNK3, BMPR1A, BRD3, IFITM9P, LOC102724265, SSPN, MIR1204, CCND1, ITPR2, PVT1 |
| LGCA  | ERBB2, IRF1, SLC22A18, ERCC6, RASSF1, PIK3CA, EGFR, MAP3K8, CASP8, PARK2, DLEC1, FASLG, BRAF, PPP2R1B, MXRA5, KRAS, CYP2A6, CDKN2A, TP53, BRCA2, PTEN, GSTP1, ERCC1, STK11, BAP1, VHL, CDH13, AKT1, CHEK2, CHRNA3, CHRNA5, CHRNA4, CLPTM1L, TP63, FEN1, RAD52, NOTCH3, IL24, CTNNB1, FHIT, CD274, GSTM1, IL6, IL10, MET, OGG1, MAPK1, TERT, WT1, CDKN1A, CDKN1B, CRP, MAPK14, CYP1A2, CYP1B1, CYP2E1, CYP24A1, ACE, EPHX1, ERBB3, ESR1, FGFR1, FOXM1, GSTT1, NRG1, APC, HRAS, IFNG, FAS, IL1B, MIR146A, MIR155, MIR21, MIR31, MCL1, MMP1, MPO, MTHFR, MYC, PRKN, PCNA, SERPINA1, MAPK3, MAP2K7, RAF1, RARB, CCND1, ACTB, SOX2, SOX9, SPP1, TGFB1, TNF, TP73, TYMS, XPC, CAV1, RUNX3, BECN1, BIRC5, HMOX1, MIR193A, TLR4, DNMT3A, EGR1, GPX1, IL2, MIR30A, TGFB2, PRDX1, ROBO1, SFTPD, DAPK1, DPYD, ANXA2, JUN, MIR34B, MIR98, NOS2, MIR4435-2HG, CCN2, GJA1, PDCD4, GCLC, APOE, PON1, SFTPB, DDR1, CASC1, USP18, EFEMP1, FGFR2, GAST, GATA6, HES1, MIR222, MARCKS, MMP10, ERGIC3, RTEL1, MIR410, STAT5A, TFRC, WNT5A, CXCL14, PRDX6, PTGIS, BCL2L1, TTR, ADA, JAG1, FOS, RICTOR, GPX3, CCN1, MIR10A, MIR34C, UGT2B17, SLC7A5, RIOX2, SOX30, CEACAM1, RAMP2, CDKN1C, DAB2IP, FOSB, JUNB, JUND, NFYA, PTMA, SLC3A2, CHRNA7, FGF9, GJB1, APOA1, HTRA1, TEPI, BHLHE41, DOK3, CALML3, CCND2, SELENBP1, DOK2, COX17, ADAM28, PTPRT, EEF2, EMX2, HEY1, ANKRD18A, GC, SND1, SLC01B3, PYCARD, APOC3, LECT2, MIRLET7BHG, MIR127, MIR154, MIR224, MIR370, ATOX1, NOTCH2, NPPA, PPBP, AZGP1, MIR432, MIR494, RAD21, ALX4, CCL18, SELENOP, MIR487B, CA12, CCNG1, CLCA2, MIR938, CCAT1, SPRY2, SMC2, CES1, EHMT2, CHRNA2, ACSM1, CLTB, COL6A1, CPE, LMNTD1, DNASE1L3, DOK1, EFNB2, A2M, FOSL2, RCHY1, ANK3, GRB7, HILPDA, ID3, IDS, IGBP1, MIR136, MPP1, MIR302D, MIR369, SIDT2, CHST15, PGGT1B, TMEM45A, EAF2, MIR409, MIR511, RIT1, AVPI1, ATG101, SMARCC1, STIM1, SERPING1, TSHR, TYRP1, IL1R2, STN1, CWH43, IKBKG, PDLIM4, RNASET2, MAP4K4, IER2, SECISBP2L, IQSEC1, MIR6808, VTI1A, MIR3164, ACVR1B, KRT8, FRY, RAD51B, HNF1B, BPTF, BABAM1, RPS2P1, NEK10, RPL26P19, BAG6, APOM, BTNL2, RPL32P1, LINC01276, FOXP4-AS1, UBA52P6, SLC17A8, MXRA8, MYEOV, XPOTP1, MAP3K1, HLA-DPA2, DMRTA1, NR1H4 |                                                                                                                                                                                                                      |
| LIVCA | TP53, AXIN1, MTUS1, CDKN3, PIK3CA, CASP8, PDGFRL, CTNNB1, MET, APC, IGF2R, HNF1A, CDKN2A, IGF2, KRAS, HTATIP2, ARID2,                                                                                                                                                                                                                                                                                                                                                                                                                                                                                                                                                                                                                                                                                                                                                                                                                                                                                                                                                                                                                                                                                                                                                                                                                                                                                                                                                                                                                                                                                                                                                                                                                                                                                                                                                                                                                                                                                                                                                                                                                                                                  | TP53, AXIN1, MTUS1, CDKN3, PIK3CA, CASP8, PDGFRL, CTNNB1, MET, APC, IGF2R, HNF1A, CDKN2A, IGF2, KRAS, HTATIP2, ARID2,                                                                                                |

---

FOXM1, GPC3, GNMT, MYC, ABCB1, PTEN,  
PTGS2, PTK2, HAMP, SKP2, TERT, TGFA,  
CCNE1, CDK1, KIF1B, MICA, LOC101929072,  
HLA-DRB1, HLA-DQB1, HLA-DQA1,  
MTCO3P1

FOXM1, GPC3, GNMT, MYC, ABCB1, PTEN,  
PTGS2, PTK2, HAMP, SKP2, TERT, TGFA,  
CCNE1, CDK1, ABCB4, IQGAP2, MECP2,  
NR1H4, ARID1B, A2M, HRAS, NFE2L2,  
SERPINA1, STAT4, DEPDC5, IDH1, CDK14,  
SPRTN, HOTAIR, MICA, CDK4, CDKN1B,  
YAP1, CEBPA, UBD, HPSE, COPS5, CRP,  
CYP1A1, CYP1A2, CYP2B6, CYP2E1, ACE, AFP,  
E2F1, EGF, EGFR, EGR1, EPHX1, EPO, ESR1,  
EZH2, F2, FASN, FBP1, FOS, MTOR, GAPDH,  
GJB1, GLI1, GLUL, CD274, GSTM1, GSTP1,  
HGF, APEX1, HSPA5, HSPB1, BIRC5, APOA1,  
IFNA1, IGF1, IGF1R, IL6, CXCL8, IRS1, AR, JUN,  
STMN1, MIR122, MAGEA1, MAT1A, MKI67,  
MMP2, MMP9, NEK2, NME1, NOTCH3, PKM,  
PLK1, PPARG, AKR1B10, RAC1, RB1, CCND1,  
ACTB, CXCL12, SFRP1, SLC2A1, SLC5A5,  
SREBF1, STAT1, AURKA, TGFB1, THY1, TLR4,  
TNF, ARID1A, NR0B2, RUNX3, TNFSF10,  
CCNB1, SOCS3, CD34, FGF19, NAT2, CEBPB,  
ATG7, LPA, MAGEA3, MAGEC2, SCD, SOD2,  
TFPI2, IGF2BP1, FOSB, UHRF1, HSPA9, CCN1,  
PCK1, BCL2L1, SLC22A1, BRAF, VIPR1, BTG2,  
AURKB, GDF15, KMT2B, PCLAF, CYLD, ENO1,  
MAD2L1, MCM2, ATM, PRDX2, TOP2A, TYMS,  
PTTG1, CCR1, CYP17A1, DPYD, ACSL4, TPX2,  
KIF4A, RACGAP1, KIFC1, KMT2A, PGK1,  
RARA, ROBO1, E2F8, MELK, CDH13, CDCA5,  
ADRA1A, GHR, ACACA, HOXA13, MPO,  
MYBL2, NFKBIA, PRDX1, ACOX1, DEPDC1,  
PBK, RRM2, CA2, CD276, AXIN2, IRS2,  
IQGAP1, PRC1, CD5L, CD163, ISG15, CDC20,  
CDC25C, CDKN2C, NDC80, CEBPD, IGF2BP3,  
ESM1, CYP2C8, DCN, FGF4, PDIA3, HMGCR,  
IL1RN, IRF2, MT1A, MLXIPL, NUSAP1,  
YTHDF2, PDK4, PHB, CEP55, NCAPG, CSMD1,  
MIR539, SSX1, MIR615, TTK, ZFP36,  
ARHGEF39, FCN3, SOCS2, EXO1, TRIP13,  
DLGAP5, KIF14, MIR885, TROAP, FST, CAP2,  
CENPF, LYVE1, UBE2C, ADAMTS13, ADRA2B,  
RCAN1, ECT2, SKA1, FCN2, FGF3, ASPM,  
MTBP, UBE2T, HMGB2, HOXA10, MT1E, MT1F,  
GMNN, ANLN, HJURP, RPS6KA3, SLC2A2,  
SREBF2, BUB1, BUB1B, UCHL1, KIF18A, BCO2,  
TAGLN2, TRIM24, APLN, CCNB2, SLIT2,  
ADAMTS1, CDC6, CENPA, CENPE, VASN,  
ADH4, IQGAP3, COMT, CTSD, CYP4A11,  
EGR2, FABP5, FANCD2, CPEB3, GDF2, GNAO1,  
SFN, FLVCR1, PYCARD, GYS2, ANXA4,  
HGFAC, HOXD9, IL1RAP, ASPG, LIFR, ME1,  
MVK, NNMT, HERC5, ZDHHC2, CLEC1B,  
GTSE1, DTL, PDGFB, PITX1, TCIM, KIF15,  
KMT2C, CCL14, BID, HHIP, SHH, TALDO1,  
TCF19, TSC1, NR1H2, WDR76, FAM83D,  
CDCA3, NUF2, MARCO, CBR1, INPP4B,  
DIRAS3, PKMYT1, KIF23, CXCL14, KIF20A,  
ERP29, ZWINT, PARK7, GPR182, VSIG4,  
THEM4, JDP2, COL15A1, UROC1, CP, CRHBP,  
TTC36, CSPG4, BMPER, OIT3, ECM1, CELSR3,  
NLRC3, SKA3, SCAP, CEP131, NCAPH, GNAZ,  
SLC25A47, HMMR, APOF, APCS, LINC00221,  
RND3, MAGEA6, MAPT, MT2A, ACLY,  
TONSL, ACO2, HAO2, CFP, MED1, LRRC1,  
MCM10, STAB2, DEPDC1B, PTH1R, RPS6,

---

|      |                                                                                                                                                                                                                                                                                                                                                           |                                                                                                                                                                                                                                                                                                                                                                                                                                                                                                                                                                                                                                                                                                                                                                                                                                                                                                                                                                                                                                                                                                                                                                                                                                                                                                               |
|------|-----------------------------------------------------------------------------------------------------------------------------------------------------------------------------------------------------------------------------------------------------------------------------------------------------------------------------------------------------------|---------------------------------------------------------------------------------------------------------------------------------------------------------------------------------------------------------------------------------------------------------------------------------------------------------------------------------------------------------------------------------------------------------------------------------------------------------------------------------------------------------------------------------------------------------------------------------------------------------------------------------------------------------------------------------------------------------------------------------------------------------------------------------------------------------------------------------------------------------------------------------------------------------------------------------------------------------------------------------------------------------------------------------------------------------------------------------------------------------------------------------------------------------------------------------------------------------------------------------------------------------------------------------------------------------------|
|      |                                                                                                                                                                                                                                                                                                                                                           | CCL3, TGM3, TH, TST, C9, UMPS, VCAM1,<br>ZIC2, ZNF23, CENPM, EPS8L3, KDM8,<br>CHAF1B, RTP3, TATDN1, MFSD2A, ZIC5,<br>EIF3H, CCNA1, ARHGAP11A, DNAJC6, TRAIIP,<br>CLEC4M, TACC3, ATP5PD, NKILA, COLEC10,<br>CETP, LILRB5, KIF2C, INMT, RNF157, ADD1,<br>DCAF4L2, PPP4R3C, KIF18B, CCBE1, CKAP2L,<br>CDCA2, DBH, AKR1C2, OLFML2A, COX7B2,<br>DNASE1L3, ETFA, FDFT1, PHLDA1, GABRD,<br>PAMR1, OLFML2B, GPM6A, WDR62, EHD3,<br>HSD3B2, CLEC4G, IGBP1, IGFALS, ITIH3,<br>FAM111B, KCNN2, KIF11, CENPW, SLC22A10,<br>FAM180A, LCAT, LETM1, C14orf180, MSH5,<br>ORC1, AADAT, CYP39A1, PLAC8, MBTPS2,<br>PGD, SERPINA4, PKP1, TMEM70, PPP1R1A,<br>CDCA8, FANCI, NEIL3, LRRC59, ASF1B, EAF2,<br>PLXDC1, CLTRN, SPC25, MIR520B, GPR158,<br>GBA3, PYGL, PZP, RRM1, CSRN1, SLC26A6,<br>XAGE1B, FAM72B, TK1, INS-IGF2, UBE2E2,<br>CENPU, DIPK2B, FBXL18, MOGAT2, TEDC2,<br>CDT1, CDC45, PITPNM3, PLVAP, ANGPTL6,<br>MRO, SRPX, ZIC4, RAD54L, CNDP1, RSPO3,<br>ADGRG7, CNTNAP4, TSLP, PNPT1, MBTPS1,<br>FATE1, CCNF, TICRR, USP2, TIMD4, LRAT,<br>PRDX6, GINS1, KBTBD11, KIF1B, GRIK1,<br>LOC101929072, HLA-DRB1, HLA-DQB1,<br>MTCO3P1, HLA-DQA1, HLA-DQA2                                                                                                                                                                  |
| OVCA | BRCA1, PIK3CA, RRAS2, PARK2, CTNNB1,<br>AKT1, SEPT9, CDH1, OPCML, BRCA2, ERBB2,<br>KRAS, MLH1, MSH2, PTEN, TP53, RAD51C,<br>BRIP1, PMS2, ESR1, CCNE1, RAD51D, BRAF,<br>RSPO1, FGFR2, MIR3164, KRT8, HNF1B, NSF,<br>SKAP1, BABAM1, HAGLR, HAGLROS,<br>TIPARP, RPL26P19, LINC00824, LSM1P1,<br>IFNL3P1, HOXD3, MYEOV, MAP3K1,<br>LINC00977, RPL31P42, IFNL3 | BRCA1, PIK3CA, RRAS2, PARK2, CTNNB1,<br>AKT1, SEPT9, CDH1, OPCML, BRCA2, ERBB2,<br>KRAS, MLH1, MSH2, PTEN, TP53, RAD51C,<br>BRIP1, PMS2, ESR1, CCNE1, RAD51D, BRAF,<br>MSH6, PRKN, STK11, SMARCA4, TP63,<br>EPCAM, BNC2, RNF43, BABAM1, CHMP4C,<br>MSLN, EGFR, FOLR1, MTOR, TIPARP, IL6,<br>CXCL8, MYC, PMS1, MAPK1, STAT3, SKAP1,<br>MUC16, TERT, CDKN1B, TUBB3, FASN, MET,<br>ZEB1, AKT2, SPARC, TNFSF10, BIRC5, SULF1,<br>YAP1, XIAP, CYP1B1, MAPK3, CAV1, EDNRA,<br>FGF1, AREG, SKP2, WNT7A, GADD45A,<br>MKI67, KLK10, SLC5A5, DPH1, MECOM,<br>MAP2K1, SOD2, TYMS, HDAC6, CDK12,<br>ATP7B, TP53BP1, ATG7, ARL11, NR5A1,<br>SPDEF, NME2, DESI2, ATR, BCL9, SLC2A1,<br>CCND2, SELENBP1, ATG5, MRE11, NECTIN2,<br>RBL2, BAP1, DLC1, CAMKK2, EREG, ERCC4,<br>JMJD6, ALOX5, ANXA3, HOXD1, IL6ST, SOD1,<br>TLR4, URI1, DYRK1B, GPR150, HOXD11,<br>PIK3R1, PRTFDC1, ITGA8, SRSF10, POP4,<br>DOK1, ERCC6, ALOX12B, KANSL1, GRIK2,<br>HOXB9, HOXD9, IL11RA, AQP3, SLC22A10,<br>ATF3, HAU56, PPP1CC, LRRC59, TRMT11,<br>WDR77, PLEKHF1, C19orf12, CCNH, MACIR,<br>LRRC46, PRC1, FAM107A, MIR6808, RSPO1,<br>MLLT10, FGFR2, MIR3164, KRT8, FRY, RAD51B,<br>HNF1B, NSF, HAGLR, HAGLROS, RPS2P1,<br>NEK10, RPL26P19, LINC00824, LSM1P1,<br>IFNL3P1, HOXD3, MXRA8, MYEOV, XPOTP1,<br>MAP3K1, LINC00977, RPL31P42, IFNL3 |
| PACA | RBBP8, TP53, ACVR1B, SMAD4, STK11, KRAS,<br>PALLD, BRCA2, PALB2, BRCA1, CDKN2A,<br>RPL23AP16, LINC00867, PDX1-AS1, RNY1P8,<br>LINC00673, BACH1, TFF2, TERT, CLPTM1L,<br>LINC-PINT, ABO, NR5A2, PRLHR, MARK2P12,<br>TFF1                                                                                                                                   | RBBP8, TP53, ACVR1B, SMAD4, STK11, KRAS,<br>PALLD, BRCA2, PALB2, BRCA1, CDKN2A,<br>EP300, NR5A2, ABO, PTEN, TERT, APC,<br>SPINK1, TSC2, BAP1, EGFR, HIF1A, STAT3,<br>WT1, MSLN, CTNNB1, AKT2, CXCL8, PDX1,<br>KDR, MMP2, MMP9, MYC, ATM, PTGS2, SST,                                                                                                                                                                                                                                                                                                                                                                                                                                                                                                                                                                                                                                                                                                                                                                                                                                                                                                                                                                                                                                                          |

PRCA

EPHB2, BRCA2, PTEN, MAD1L1, HIP1, CD82, ZFH3, KLF6, AR, MXI1, CDH1, FGFR4, MSR1, CHEK2, HOXB13, RNASEL, MSMB, ELAC2, EHBP1, APC, SPOP, CTNNB1, IGF1, NKX3-1, KRAS, CCND1, TGFB2, KCND3, GOLPH3L, MDM4, RPL23AP61, FGFR2, MIR4686, RPS2P38, MIR3164, MMP7, TUBA1C, KRT8, GLULP5, LINC00421, FERMT2, VPS53, HNF1B, ZNF652, LOC102724596, CASC17, DPF1, PCAT19, KLK15, KLK3, MIR4752, GGCX, TANC1, ITGA6, ADNP, ZGPAT, RPS25P10, CXorf67, XAGE3, TEX11, CHL1-AS1, PPATP1, SIDT1, PRKCI, SKIL, AFM, PDLIM5, TERT, CTD-2194D22.4, RPL26P19, RFX6, RGS17, SLC22A1, SLC22A3, RPS26P30, JAZF1, FAM60DP, EBF2, FAM84B, PCAT1, PRNCR1, SRRM1P1, CCAT2, CASC8, RAD23B, AGAP7P, ASCL2, LUZP2, MYEOV, PRPH, TBX5, PARP4P2, PPP1R14A, KLK2, LILRA5, VAMP8, BIK, NUDT11, SLC7A3, LINC01266, LINC00506, CLDN11, MAP3K1, SLC22A2, ASS1P11, CCAT1, CASC11, HMGN2P32

TGFB1, TNF, TYMS, TNFSF10, CD44, CD24, PPARG, MEN1, LDHA, SLC29A1, PLA1, SOD2, SSTR2, IL24, DPYD, IFNA1, AXL, MAP2K4, TGM2, CDH1, NR4A1, EPCAM, PTCH1, TFP12, NRP1, LINC00673, GADD45A, RNF43, TYMP, RAP1GAP, RB1, KLF5, VHL, AHR, EFEMP1, FGF13, PTHLH, CCL20, SSTR1, TNFRSF10B, CFLAR, DAXX, FXYD3, MIR1179, ANXA10, FOXP1, IFNA2, NFKB1A, SSTR3, BUB1, VEGFB, TP63, CCAT1, CLPTM1, CNR1, CNR2, GAGE1, RABL3, IFNA5, LY6E, ETAA1, ATRX, BCL2L1, SYCP1, SUGCT, ZNRF3, BCAR1, RPL23AP16, LINC00867, PDX1-AS1, RNY1P8, BACH1, TFF2, FAM19A5, CLPTM1L, DAB2, LINC-PINT, CASC8, PRLHR, MARK2P12, C1D, TFF1, CASC11

EPHB2, BRCA2, PTEN, MAD1L1, HIP1, CD82, ZFH3, KLF6, AR, MXI1, CDH1, FGFR4, MSR1, CHEK2, HOXB13, RNASEL, MSMB, ELAC2, EHBP1, APC, SPOP, CTNNB1, IGF1, NKX3-1, KRAS, CCND1, TGFB2, SRD5A1, RXRA, EGFR, PCAT1, KLK3, NBN, PIK3CA, BRCA1, HNF1B, TP53, SLC22A3, CTBP2, RFX6, LDAH, FOXP4, LMTK2, PALB2, FGF10, POLK, CDKN1B, CLU, EGF, EGR1, ERBB2, AKT1, ERG, ESR2, EZH2, FOLH1, AMACR, GSTP1, HIF1A, IGFBP3, IL6, CXCL8, MMP9, MYC, PTGS2, BCL2, CXCL12, SRD5A2, STAT3, TGFB1, TMPRSS2, VDR, VEGFA, CAV1, ZBED1, NAT2, CDKN1A, NDRG1, VAV3, AGR2, CENPF, IL24, CHD1, COMT, CREBBP, PARP1, DAB2IP, CYP1A1, CYP1B1, CYP3A4, CYP17A1, CYP19A1, ACE, NQO1, DNMT1, DNMT3B, AHR, ERCC2, ESR1, ETV1, ETV4, FGF2, FOXO1, SIRT1, BRD4, GJA1, SETD2, NR3C1, GRPR, GSK3B, GSTM1, GSTT1, HMOX1, FOXA1, HPN, APEX1, HSD3B1, IL10, GSTK1, KLK2, LEP, MIR21, EPCAM, MDM2, MET, MLH1, MME, MTHFR, ATM, NFE2L2, NOS3, OGG1, SERPINE1, PAWR, PIK3CB, PIK3CD, PLA1, CCHCR1, RNF43, MAPK3, PTHLH, BGLAP, SHBG, SLC5A5, SOD2, SOX2, SPINK1, ST14, AURKA, TERT, TLR4, TPD52, UGT2B15, UGT2B17, VIM, VIP, XRCC1, CALCA, PSCA, CALR, NCOA3, CASP9, AKR1C3, TNFSF10, MBD2, CCND2, GDF15, CAMKK2, CTSB, CYP3A5, ETV5, TMEFF2, ANXA1, ICAM1, IL18, JAK2, EAF2, AZGP1, NCOA1, SCHLAP1, NCOA2, JAZF1, HOXD3, SERPINF1, PML, SELENOP, TGFA, NRP1, IL27, SLC39A1, HSD17B3, IDH1, IGFBP7, IL2, KMT2A, MPO, TRPM4, DCAF6, PRKDC, BAX, CYP3A43, BMP7, ADAM9, ITGB3, ERBB3, NEAT1, GPX3, HSD3B2, STMN1, PON1, PPARA, PAK6, BRAF, TOP2A, HMGN5, UXT, NAT1, BAD, TLR6, ADRB2, ALOX5, KLK5, IRS1, ATF3, NGFR, PIK3R1, TET2, SULT1E1, SULT2A1, TPT1, DDR1, CD276, EIF3H, TNFRSF10A, GREB1, EHF, BIRC5, MIF, ABCC4, TXNRD2, SERPINA3, CTSD, CYP2E1, DEFB1, LPAR1, EPHX1, FHIT, GHR, GNMT, AOX1, LPL, MIR106A, MMP13, MSH3, MT2A, NUCB2, ZBTB7A, PIK3R2, ADI1, PRKCZ, RB1, RRAS, CX3CL1, SMARCA1, SPOCK1, SSX2, SULT1A1, PRDX2, EZR, XPO1,

---

USP7, STEAP4, RUNX1, MED12, PLAUR, RLN2, HDAC6, CDK2AP2, BAZ2A, LZTS1, CLDN3, CLDN7, DAG1, GADD45A, FOXC1, ABO, GSTA1, GSTM3, ANXA3, IGF2R, FASLG, IL16, LIFR, MAP3K1, PDHA1, CDK12, PODXL, B2M, VPS52, SLC7A1, MAP3K7, VCP, KMT2D, H4C8, IL17RC, ONECUT2, CREB3L4, GCNT1, JAK1, MUC4, PPP2R2A, TIMP4, UMPS, CYP7B1, MYBBP1A, WASF3, STARD3, CSRP1, EMP1, ACSL4, FBLN1, GGT1, PDIA3, HMGB2, HPGD, HSD17B1, HSPA1A, IL1RN, ITPR1, ARG2, LAMC1, LDHB, LRP2, MBD1, PCDH8, PDE4D, PENK, PMS1, ATR, IL17RD, PARD3, PVR, RAD23B, RAG1, KLKP1, BNIP3, TERC, KDM6A, ZIC2, ZBTB16, TBL1XR1, TXNDC5, CAPNS1, PPFIBP2, EIF3A, ALDH1A2, CCNH, LITAF, BCAR1, NCOR1, SETDB1, CDH13, CTCF, ADAM28, CST6, CYP2C19, ERF, SSBP2, ABR, EFEMP2, HNRNPH1, HRAS, ID3, INS, JUP, DCXR, PDP1, PRKACB, EIF2AK2, PRNP, BMPR1B, TMF1, HSP90B1, TYMS, PCDH11Y, USO1, CPNE3, CD9, SPON2, PGRMC1, RALBP1, CBX1, AKAP13, SLC31A1, CRYAB, ALAD, ETV3, EWSR1, SPEN, SF3B1, GALNT3, SENP6, PHGDH, ANXA4, IGFBP6, M6PR, MTAP, PAX6, IRAK4, LRP1B, CASZ1, PPL, NOL8, ATAD3A, PPP3CA, PRSS8, PTPRC, PTPRK, NECTIN2, ARID4A, ALOXE3, ROBO1, RPL10, RPS19, ABCG5, SULT2B1, TAP1, TRAF1, WNT10B, EPS8L3, ARHGEF5, BAP1, MBTPS1, CBR1, MACIR, HERPUD1, CDC27, TOM1L1, CDH12, PDZK1IP1, PATJ, OLFM1, FBLN5, IVNS1ABP, CELF2, STARD10, KDELRL1, SERINC3, ERP29, SPINK5, CHD3, ADAMTS8, PKP3, CHST14, TIRAP, ANTXR2, TPP1, PAQR4, CNN3, COL5A1, COL15A1, SPATA18, NCOA7, ASZ1, TAF1L, SESN3, CST1, PYHIN1, IGSF5, CYP2A6, CYP2C18, CYP11B2, DNASE1L2, EHHADH, ARID2, UNC13D, EMP3, DHX30, ZNF292, ERP44, FAF2, ARL6IP1, JMJD6, PDS5A, RPRD2, MGA, JADE2, AHCYL2, SDF2L1, ALOX12B, CIZ1, CLIC4, ZBTB20, LCE2B, PLEK2, TJP3, TNFRSF21, DHDH, GNG5, GOLGA4, TTC9C, RGMB, GRB7, KLF15, THYN1, PSMC3IP, HBG1, HBG2, FOXA3, HOXB9, HSP90AB1, IL6ST, SP5, LAMB2, MC2R, ACHE, MYCL, NAGLU, NFIC, CNOT3, NPPA, NPR3, P4HB, NOX3, COL5A3, ITSN2, CRYL1, RLIM, PIGP, WAC, PTRH2, RASD1, SLC26A4, PDZK1, PGAM2, SERPINB10, PITX3, RAB4B, PRRX1, ATP7B, WNT4, HAO1, DNAJC10, SAMD9, RNF31, APPL2, RFK, TBC1D2, STAB2, NAGK, CHD7, RNF130, SELENOS, ASH1L, DNAJC3, DIABLO, TCEAL7, SMARCAD1, NIPAL3, USP28, KMT2C, ENPP5, RNASE4, ROBO2, RPL11, RPL12, RPN2, ACSM3, SIL1, ITSN1, NDST4, SLC4A2, SLC12A2, SSR2, ZFP36L2, SURF4, TBXA51, TBX3, TCN2, TCP1, TLR5, TMOD1, TMSB4X, TPBG, TPD52L1, TST, U2AF1, UCP3, UCK2, ZFAND5, BRPF1, MYH14, GSTCD, KAT6A, AAAS, CLPTM1L, ARID1A, H2BC8, GUCD1, CHD6, ACRBP, CUL3, NDST2, BCAS1, DEGS1, CAV2, B4GALT4, MATN4, CREG1, ZNF160, CLDN9, ZMYM3, INTS4, FBXO44, GRHPR,

---

|      |                                                                                                                                                                                                                                                                                                                                                                                                                                                                                                                                                                                                                                                                                                                                                                                                                                                                                                                                                                                                                                                                                                                                                                                                                                                                                                                                                                                                                                                                                                                                          |
|------|------------------------------------------------------------------------------------------------------------------------------------------------------------------------------------------------------------------------------------------------------------------------------------------------------------------------------------------------------------------------------------------------------------------------------------------------------------------------------------------------------------------------------------------------------------------------------------------------------------------------------------------------------------------------------------------------------------------------------------------------------------------------------------------------------------------------------------------------------------------------------------------------------------------------------------------------------------------------------------------------------------------------------------------------------------------------------------------------------------------------------------------------------------------------------------------------------------------------------------------------------------------------------------------------------------------------------------------------------------------------------------------------------------------------------------------------------------------------------------------------------------------------------------------|
|      | <p>GSTO1, EI24, KEAP1, REC8, MIR6808, KCND3, GOLPH3L, MDM4, USH2A, PIP4K2A, MARCH8, RPL23AP61, TRIM8, LINC01153, FGFR2, MIR4686, RPS2P38, MS4A5, MIR3164, MMP7, LOC728114, TUBA1C, KRT78, KRT8, GLULP5, LINC00421, FRY, RNU6-66P, FERMT2, SIX1, RAD51B, UBE3A, VPS53, FLJ40194, ZNF652, LOC102724596, CASC17, SALL3, BABAM1, DPF1, PCAT19, KLK15, MIR4752, GGCX, VAMP8, TANC1, ITGA6, COL6A3, FARP2, RPS2P1, ADNP, ZGPAT, RPS25P10, SHROOM2, CXorf67, NUDT11, XAGE3, TEX11, NLGN3, CHL1-AS1, NEK10, PPATP1, LINC00506, SIDT1, EEFSEC, PRKCI, SKIL, HNRNPA1P67, AFM, PDLIM5, LOC101929468, CTD-2194D22.4, RPL26P19, RASA1, NEDD9, CASC15, NOTCH4, ARMC2, RGS17, SLC22A1, RPS26P30, TNS3, SGCZ, FAM60DP, EBF2, FAM84B, PRNCR1, SRRM1P1, CCAT2, CASC8, DMRT1, BMS1P9, MXRA8, AGAP7P, ASCL2, LUZP2, MYEOV, PRPH, RPL7P41, TBX5, PARP4P2, RNU7-89P, SIX4, MIR6129, ATP9B, PPP1R14A, LILRA5, MLPH, XPOTP1, BIK, CENPVP3, SLC7A3, GJB1, LINC01266, CLDN11, RNU6ATAC5P, SLC22A2, ASS1P11, CCAT1, CASC11, AQP7P4, HMGN2P32</p>                                                                                                                                                                                                                                                                                                                                                                                                                                                                                                                    |
| SKCM | <p>MC1R, CDKN2A, STK11, POT1, PTEN, CDK4, BRAF, MITF, XRCC3, TERT, TYR, HRAS, ERBB4, GNA11, GNAQ, NRAS, MAP2K1, TP53, BAP1, MAP2K2, NF1, RAC1, PPP6C, PARP1, CTNNB1, ERCC2, AKT1, KIT, MDM2, MTAP, ATM, SLC45A2, PIK3CA, RAF1, BRCA2, XPC, TRRAP, PDGFRA, CASP8, ERCC4, FTO, ERCC5, SDHD, DDB2, ERCC3, MX2, XPA, AKT3, CDK2, HPSE, CSF2, CTLA4, E2F1, MLANA, FLT1, PRAME, ABCB5, IFNA1, IFNA2, IFNB1, IFNG, IL2, LGALS3, MAGEA1, MET, MELTF, PDCD1, POMC, PPARG, PTGS2, CCND1, RET, S100A4, PMEL, TLR4, TNF, TYRP1, VEGFC, KLRK1, ALK, TNC, CRYBG1, FASLG, ASIP, AURKA, HDAC6, ALDH1A1, ARNT, CUX1, MMP8, GDF15, ERCC1, APEX1, SETDB1, EPO, PTK2B, FASN, PHGDH, PAK1, LXN, RAP1GAP, ROS1, NDRG1, STAG2, CSF3, EPOR, GRIN2A, RASA2, SLC5A5, SYK, TFPI2, GAB2, EP300, JMJD6, SUZ12, GLO1, GRM3, MIR340, NF2, PPARD, STX17, PRDX2, FAT4, CAPN1, HOXB13, STIP1, IL1RAPL1, BATF2, CLU, CST6, CTH, ALDH1A3, KDM1A, ABL1, ASF1A, SLC17A5, HSPA1A, MAP3K5, MAP3K9, MYO7A, PAX4, PLCB4, TNFRSF19, WFDCC1, RAC2, RPS3, SIPA1, SYT4, CASP10, CUL3, ACVR1, RIN1, MAGEC1, CDKN1C, RPP38, DRAP1, RAI1, PRSS23, TMEM132B, DDIT4L, NUS1, CLNS1A, CPT1C, COL2A1, ZNF831, CP, CYP1B1, CCDC63, TMEM30B, DCC, GPHA2, DLG2, DSC1, EDA, KHDRBS2, EPB41, F2RL1, ZNF438, SLC39A12, ARL5B, NT5DC1, HS3ST5, RFX6, KDM4B, KDM4C, TSPYL4, UBR4, NPAP1, VGLL2, QPCT, PPP1R14B, CNM1, SLC25A45, CD163L1, DCBLD1, DNAJC15, SAC3D1, RAX, HDAC2, HOXA9, HOXD12, TAS2R60, IFNA5, INCENP, KLRB1, ARL2, MPST, MYO1B, NFKBIE, NPPA, PAX6, HIKESHI, PIP4K2A, LRP1B, WDR74,</p> |

|      |                                                                                                                                                                |                                                                                                                                                                                                                                                                                                                                                                                                                                                                                                                                                                                                                                                                                                                                                                                                                                                                                                                                                                                                                                                                                                                                                                                                                                                                                                                                                                                                                                                                                                                                                                                                                                                                                                                                                                                                                                                                                                                                                                                                                                                                                                                                                                                                    |
|------|----------------------------------------------------------------------------------------------------------------------------------------------------------------|----------------------------------------------------------------------------------------------------------------------------------------------------------------------------------------------------------------------------------------------------------------------------------------------------------------------------------------------------------------------------------------------------------------------------------------------------------------------------------------------------------------------------------------------------------------------------------------------------------------------------------------------------------------------------------------------------------------------------------------------------------------------------------------------------------------------------------------------------------------------------------------------------------------------------------------------------------------------------------------------------------------------------------------------------------------------------------------------------------------------------------------------------------------------------------------------------------------------------------------------------------------------------------------------------------------------------------------------------------------------------------------------------------------------------------------------------------------------------------------------------------------------------------------------------------------------------------------------------------------------------------------------------------------------------------------------------------------------------------------------------------------------------------------------------------------------------------------------------------------------------------------------------------------------------------------------------------------------------------------------------------------------------------------------------------------------------------------------------------------------------------------------------------------------------------------------------|
|      |                                                                                                                                                                | MTPAP, ACER3, ECHDC1, PCDHB8, AKR1B10,<br>GOPC, GPAM, FAM160B1, PTPRK, PTPRO,<br>TRAPPC1, DNAJC1, IQCH, SLC6A11, SLC15A2,<br>UGT2B10, MRPL49, SF1, EPHX3, ADAMTS20,<br>MLLT10, CUBN, SLC35G2, C11orf68, EIF1AD,<br>CBS, PKMYT1, PTER, KDM4A, BZW1, USP6NL,<br>JAKMIP2, REC8, LOC100996521, OBFC1,<br>YWHAZP5, IFITM9P, OCA2, CDK10, AFG3L1P,<br>RMDN2, ALS2CR12, RALY, PIGU, MYH7B,<br>MIR499A, PLA2G6, IRF4, RAD17P1,<br>SLC25A6P5, RPL23AP59, EXOC2, AHR,<br>MIR8081                                                                                                                                                                                                                                                                                                                                                                                                                                                                                                                                                                                                                                                                                                                                                                                                                                                                                                                                                                                                                                                                                                                                                                                                                                                                                                                                                                                                                                                                                                                                                                                                                                                                                                                             |
|      |                                                                                                                                                                | ERBB2, MUTYH, IRF1, PIK3CA, CASP10, KLF6,<br>APC, FGFR2, KRAS, CDH1, IL1RN, IL1B, MET,<br>ATM, CDKN1A, PRKAA1, TP53, CHEK2,<br>CDKN2A, ZBTB20, ERBB3, DLC1, AXIN2,<br>HOTAIR, AFP, DNMT1, DNMT3B, DPYD,<br>EGFR, ERCC1, ERCC2, ALB, FHIT, GAST,<br>GSTP1, IL6, CXCL8, SMAD4, MLH1, MMP7,<br>MSH2, MTHFR, MUC1, MYC, SERPINE1,<br>PLCE1, PPARG, CHFR, MAPK1, MAPK3,<br>GKN1, PTGS2, CCND1, SNAI1, STAT3, TNF,<br>TWIST1, TYMS, XRCC1, XRCC3, PSCA,<br>ARID1A, CAV1, RUNX3, CD44, CDK4, BAP1,<br>RHOA, REG4, APEX1, PLAU, KRT20, BRAF,<br>TIMP3, CCAT1, ACE, ENO1, IGFBP3, LGALS3,<br>PRKAB1, PRNP, KLK10, FAT4, CASP8, BIRC5,<br>CDKN1B, AHR, ZNRD1, HMOX1, AREG,<br>NOTCH2, KMT2C, SOD2, IL32, ARL6IP5, JUN,<br>MT2A, NPM1, XAF1, MAPK8, BMP2, TGFA,<br>AURKB, ADRB2, TYMP, F2R, HRAS, HSPB1,<br>IGFBP7, ITGA5, MUC6, PHB, PTPA, FSD1,<br>MTSS1, CTNNA1, FBP1, PYCARD, KISS1,<br>KMT2A, SERPINB2, PAX6, WWOX, PRKCB,<br>MSLN, WIF1, CLCN3, ECM1, ING1, NOS3,<br>UBR5, PDHA1, ATR, RNF43, RARRES1,<br>BCL2L1, RORA, BDNF, UMP5, MIA, SCRNI1,<br>EBI3, CKB, LRRC3B, DCBLD2, CLDN3, CST1,<br>HBEGF, ECHS1, EEF1A2, FGG, ALOX5, PRDX5,<br>GLI3, ANXA5, HSPA8, HSPD1, ICAM2,<br>TNFRSF9, KRT8, FADS1, MLF1, MMP10, MSX1,<br>NT5E, COPS7A, HIKESHI, NBAS, SERPINA1,<br>PLAGL1, POLE, PPIA, PTPRG, RARB, RGS2,<br>RPS6, BID, SLC1A2, BNIP3, TBX3, THBD,<br>KISS1R, SPZ1, MIR22HG, AKR1C3, SLC16A3,<br>CDH2, BIRC2, RPL15, MAP3K6, ZNF667-AS1,<br>TRAP1, CDKN2D, CNPY2, FST, NOP56, CCT7,<br>CTSC, PTPRT, CLN3, PLIN2, MBD3L2,<br>CTNNA2, CTSL, ADRB1, CYP2A6, DDB1,<br>GADD45A, DES, DPAGT1, AGTR2, EEF1A1,<br>ALDH1A3, FKBP2, ALDOB, FAM168A, BOP1,<br>ATP6V0D2, FYN, SERBP1, GREM1, ACAD8,<br>SNX5, FILIP1, PRPF19, MRPS18B, MRPL13,<br>ABT1, CPSF1, HNRNPL, HOXA2, APOA1,<br>HTR1A, ID4, IDH3B, IL6R, M6PR, MARK1,<br>MX1, NDUFA2, NDUFS1, NDUFV1, ALDH7A1,<br>PA2G4, UBXN1, ZNF593, GMPR2, POLR3K,<br>PGAM1, PTOV1, PPIC, PPP2R1A, PRR5-<br>ARHGAP8, PREP, NAXD, EXOSC5, RANBP10,<br>PTPRF, RAD23A, HRH4, RBP1, RBP4, RPL13,<br>RPL18, RPS15, RPS19, RPS21, RPS26, RXRB,<br>BLVRB, MRPS11, BMP7, SNRPB, SPRR2A,<br>SREBF2, ACTC1, TFAP2C, TPM3, CA1, CA2,<br>ZNF177, EPHX3, PUS1, ULBP2, TAF15, URM1, |
| STCA | ERBB2, MUTYH, IRF1, PIK3CA, CASP10, KLF6,<br>APC, FGFR2, KRAS, CDH1, IL1RN, IL1B, MET,<br>ATM, MUC1, ASH1L, PRKAA1, MEF2C-AS1,<br>LRFN2, DNAH11, PSCA, MIR3660 |                                                                                                                                                                                                                                                                                                                                                                                                                                                                                                                                                                                                                                                                                                                                                                                                                                                                                                                                                                                                                                                                                                                                                                                                                                                                                                                                                                                                                                                                                                                                                                                                                                                                                                                                                                                                                                                                                                                                                                                                                                                                                                                                                                                                    |



|      |                                                                                                                                         |                                                                                                                                                                                                                                                                                                                                                                                                                              |
|------|-----------------------------------------------------------------------------------------------------------------------------------------|------------------------------------------------------------------------------------------------------------------------------------------------------------------------------------------------------------------------------------------------------------------------------------------------------------------------------------------------------------------------------------------------------------------------------|
|      |                                                                                                                                         | SYMPK, ARFGAP2, ZNF559, TUBA1C, ITGA8, CST7, PLPP1, IRS2, TNFSF9, SUCLG1, FCGBP, SELENBP1, ZNF160, RRP9, WDR46, TMEM63A, MTX1, THBS3, ASH1L, MEF2C-AS1, LRFN2, DNAH11, MIR3660                                                                                                                                                                                                                                               |
| THCA | NKX2-1, FOXE1, BRAF, HABP2, RET, KRAS, TSHR, TP53, PCNXL2, OBFC1, ILF2P2, PTCSC3, DIRC3, NRG1, KRT18P13, SLK, LINC00609, MBIP, C9orf156 | NKX2-1, FOXE1, BRAF, HABP2, RET, KRAS, TSHR, TP53, HRAS, PTEN, NRAS, DICER1, PRKAR1A, MSH6, CXCL8, PPARG, CCND1, SLC5A5, TERT, PIK3CA, NCOA4, MTOR, HIF1A, PTGS2, TPM3, TNF, RAP1GAP, IL6, CCL2, CDKN1B, ENPP2, IL1B, TSC2, CDH1, EPO, EPOR, CXCL10, PRDM2, CSF2, RXRA, BRD4, HPGD, IFNA2, PDGFA, TPR, PTGES2, TCF7L1, PCNXL2, OBFC1, ILF2P2, PTCSC3, SMAD3, DIRC3, EPB41L4A, NRG1, KRT18P13, SLK, LINC00609, MBIP, C9orf156 |

**Table S26.** Interactome average intra-disease distance localization measure under the six settings tested in the analysis. The first column of each group of two columns shows the number of genes associated with a particular disorder represented in the interactome under analysis. The second column provides the intra-disease distance values for each list of disease-associated genes and gene variants and their associated p-values.

| Disease      | Interactome 1<br>stringent |                    | Interactome 2<br>stringent |                    | Interactome 3<br>stringent |                    | Interactome 1<br>relaxed |                    | Interactome 2<br>relaxed |                    | Interactome 3<br>relaxed |                    |
|--------------|----------------------------|--------------------|----------------------------|--------------------|----------------------------|--------------------|--------------------------|--------------------|--------------------------|--------------------|--------------------------|--------------------|
|              | N° of<br>genes             | (p-val)            | N° of<br>genes             | (p-val)            | N° of<br>genes             | (p-val)            | N° of<br>genes           | (p-val)            | N° of<br>genes           | (p-val)            | N° of<br>genes           | (p-val)            |
| <b>AD</b>    | 55                         | 1.8<br>(2.35e-07)  | 57                         | 1.54<br>(1.02e-04) | 55                         | 1.35<br>(3.86e-09) | 138                      | 1.7<br>(4.50e-04)  | 142                      | 1.43<br>(3.88e-06) | 137                      | 1.3<br>(1.31e-15)  |
| <b>PD</b>    | 69                         | 1.7<br>(1.24e-05)  | 77                         | 1.69<br>(1.05e-01) | 67                         | 1.34<br>(4.46e-14) | 138                      | 1.72<br>(4.70e-03) | 148                      | 1.57<br>(4.44e-02) | 137                      | 1.24<br>(5.90e-13) |
| <b>ALL</b>   | 16                         | 1.56<br>(4.94e-03) | 17                         | 1.71<br>(5.86e-02) | 18                         | 1.39<br>(8.90e-11) | 71                       | 1.39<br>(1.03e-03) | 74                       | 1.31<br>(5.42e-05) | 73                       | 1.3<br>(4.09e-10)  |
| <b>AML</b>   | 34                         | 1.47<br>(2.17e-02) | 34                         | 1.24<br>(3.27e-03) | 31                         | 1.13<br>(1.17e-09) | 167                      | 1.3<br>(7.39e-03)  | 172                      | 1.22<br>(2.20e-02) | 163                      | 1.23<br>(5.65e-11) |
| <b>BLCA</b>  | 22                         | 2.05<br>(9.08e-01) | 24                         | 1.42<br>(3.85e-02) | 23                         | 1.48<br>(1.53e-03) | 134                      | 1.54<br>(2.48e-01) | 142                      | 1.3<br>(5.94e-03)  | 136                      | 1.31<br>(1.04e-05) |
| <b>BRCA</b>  | 126                        | 1.47<br>(1.47e-02) | 135                        | 1.28<br>(4.91e-03) | 125                        | 1.34<br>(8.60e-05) | 1044                     | 1.15<br>(1.57e-03) | 1094                     | 1.16<br>(6.70e-02) | 1029                     | 1.24<br>(2.01e-03) |
| <b>BRNCA</b> | 17                         | 1.82<br>(1.27e-01) | 19                         | 1.26<br>(6.97e-03) | 17                         | 1.41<br>(4.02e-04) | 52                       | 1.69<br>(1.75e-02) | 57                       | 1.28<br>(4.57e-02) | 53                       | 1.3<br>(7.93e-06)  |

|                    |    |                    |    |                    |    |                    |     |                    |     |                    |     |                    |
|--------------------|----|--------------------|----|--------------------|----|--------------------|-----|--------------------|-----|--------------------|-----|--------------------|
| <b>CERV</b>        | 3  | 1.67<br>(2.08e-02) | 4  | 2.5<br>(7.48e-01)  | 4  | 1.75<br>(3.33e-02) | 5   | 1.8<br>(2.42e-02)  | 7   | 2.71<br>(9.99e-01) | 7   | 1.57<br>(2.86e-05) |
| <b>CHLCA</b>       | 3  | 2<br>(2.71e-01)    | 3  | 2<br>(8.45e-01)    | 3  | 1<br>(1.39e-02)    | 26  | 1.65<br>(1.16e-01) | 26  | 1.31<br>(2.11e-02) | 26  | 1.15<br>(9.74e-06) |
| <b>CLL</b>         | 32 | 1.56<br>(3.60e-05) | 33 | 1.73<br>(2.93e-02) | 29 | 1.79<br>(1.22e-03) | 85  | 1.45<br>(4.56e-05) | 90  | 1.4<br>(1.45e-03)  | 82  | 1.48<br>(5.16e-04) |
| <b>CML</b>         | 2  | 3<br>(5.47e-01)    | 2  | 2<br>(8.94e-02)    | NA | NA                 | 2   | 3<br>(5.49e-01)    | 2   | 2<br>(8.72e-02)    | NA  | NA                 |
| <b>CRCA</b>        | 67 | 1.54<br>(2.08e-02) | 68 | 1.18<br>(1.21e-04) | 68 | 1.26<br>(1.10e-03) | 672 | 1.27<br>(3.48e-04) | 700 | 1.25<br>(6.90e-03) | 680 | 1.36<br>(2.22e-05) |
| <b>DLBCL</b>       | 7  | 2.43<br>(5.42e-01) | 8  | 1.75<br>(1.16e-01) | 7  | 1.29<br>(1.86e-04) | 57  | 1.44<br>(8.87e-04) | 59  | 1.24<br>(1.68e-03) | 55  | 1.22<br>(5.61e-06) |
| <b>FLYMP<br/>H</b> | 7  | 2.29<br>(2.11e-01) | 7  | 2.29<br>(7.97e-01) | 7  | 1.86<br>(8.09e-02) | 26  | 2<br>(8.78e-02)    | 28  | 1.82<br>(3.27e-01) | 23  | 1.3<br>(2.09e-07)  |
| <b>HANC</b>        | 7  | 1.86<br>(5.21e-02) | 7  | 1.57<br>(1.05e-01) | 7  | 1.71<br>(1.95e-02) | 51  | 1.39<br>(3.82e-04) | 52  | 1.25<br>(3.28e-03) | 51  | 1.24<br>(3.11e-05) |
| <b>KDNC<br/>A</b>  | 17 | 1.71<br>(1.17e-01) | 19 | 1.47<br>(1.46e-03) | 17 | 1.41<br>(1.57e-05) | 135 | 1.59<br>(1.33e-02) | 146 | 1.4<br>(2.87e-02)  | 141 | 1.47<br>(4.63e-04) |
| <b>LGCA</b>        | 33 | 1.64<br>(8.21e-02) | 37 | 1.38<br>(8.68e-02) | 34 | 1.35<br>(1.27e-04) | 245 | 1.36<br>(1.91e-03) | 261 | 1.27<br>(3.16e-02) | 241 | 1.24<br>(3.40e-07) |

|       |    |                    |    |                    |    |                    |     |                    |     |                    |     |                    |
|-------|----|--------------------|----|--------------------|----|--------------------|-----|--------------------|-----|--------------------|-----|--------------------|
| LIVCA | 35 | 1.46<br>(6.05e-04) | 35 | 1.34<br>(1.56e-02) | 35 | 1.29<br>(1.93e-03) | 469 | 1.29<br>(5.52e-02) | 486 | 1.23<br>(2.38e-01) | 480 | 1.21<br>(9.31e-07) |
| OVCA  | 34 | 1.56<br>(3.51e-03) | 35 | 1.17<br>(2.51e-03) | 31 | 1.23<br>(2.75e-04) | 144 | 1.38<br>(5.05e-03) | 147 | 1.19<br>(3.62e-04) | 141 | 1.3<br>(7.51e-04)  |
| PACA  | 19 | 1.63<br>(8.37e-03) | 20 | 1.55<br>(1.16e-01) | 19 | 1.26<br>(6.79e-09) | 103 | 1.54<br>(4.57e-03) | 110 | 1.32<br>(6.77e-03) | 104 | 1.18<br>(8.12e-11) |
| PRCA  | 75 | 1.83<br>(4.89e-02) | 79 | 1.53<br>(4.77e-02) | 73 | 1.73<br>(2.41e-05) | 654 | 1.26<br>(3.45e-02) | 679 | 1.15<br>(1.57e-03) | 649 | 1.25<br>(5.69e-07) |
| SKCM  | 32 | 1.44<br>(1.07e-04) | 34 | 1.38<br>(7.64e-02) | 32 | 1.19<br>(6.06e-07) | 234 | 1.47<br>(1.74e-01) | 249 | 1.33<br>(1.95e-01) | 240 | 1.4<br>(1.62e-02)  |
| STCA  | 19 | 1.79<br>(1.92e-01) | 20 | 1.6<br>(1.79e-01)  | 20 | 1.45<br>(1.04e-03) | 289 | 1.33<br>(3.39e-03) | 299 | 1.16<br>(5.51e-03) | 287 | 1.18<br>(5.23e-07) |
| THCA  | 13 | 1.69<br>(7.99e-02) | 14 | 1.86<br>(7.17e-01) | 11 | 1.27<br>(4.23e-07) | 53  | 1.7<br>(1.74e-01)  | 55  | 1.42<br>(1.13e-01) | 52  | 1.13<br>(5.47e-09) |

**Table S27.** Sizes of the largest connected components under the six tested settings. The first column of each group of two columns shows the number of genes associated with a particular disorder represented in the interactome under analysis. The second column provides the size of the largest connected component and its associated p-value.

[illegible]

|             |    |               |    |               |    |               |     |                |     |                |     |                |
|-------------|----|---------------|----|---------------|----|---------------|-----|----------------|-----|----------------|-----|----------------|
| <b>AD</b>   | 55 | 6 (3.27e-11)  | 57 | 28 (7.50e-09) | 55 | 37 (0.00e+00) | 138 | 15 (1.71e-01)  | 142 | 75 (6.06e-05)  | 137 | 94 (6.36e-13)  |
| <b>ASD</b>  | 19 | 1 (7.12e-01)  | 19 | 4 (8.85e-02)  | 17 | 6 (1.98e-12)  | 93  | 10 (4.06e-01)  | 98  | 17 (2.06e-02)  | 96  | 29 (0.00e+00)  |
| <b>BD</b>   | 22 | 5 (1.41e-02)  | 24 | 1 (8.56e-01)  | 23 | 12 (0.00e+00) | 454 | 228 (1.37e-02) | 465 | 316 (3.06e-08) | 465 | 358 (9.76e-09) |
| <b>HD</b>   | NA | NA            | NA | NA            | NA | NA            | 15  | 1 (6.10e-01)   | 17  | 2 (1.23e-01)   | 17  | 3 (4.37e-03)   |
| <b>MD</b>   | 23 | 2 (5.60e-01)  | 26 | 3 (3.47e-01)  | 24 | 15 (0.00e+00) | 432 | 260 (5.33e-03) | 436 | 317 (5.05e-09) | 440 | 376 (2.01e-11) |
| <b>PD</b>   | 69 | 5 (2.58e-01)  | 77 | 24 (1.31e-02) | 67 | 40 (0.00e+00) | 138 | 12 (1.10e-01)  | 148 | 59 (2.77e-02)  | 137 | 101 (1.24e-09) |
| <b>SCZ</b>  | 38 | 2 (7.35e-01)  | 43 | 5 (1.31e-01)  | 41 | 28 (0.00e+00) | 888 | 594 (1.20e-02) | 923 | 684 (3.08e-03) | 890 | 759 (3.11e-14) |
| <b>ALL</b>  | 16 | 7 (3.47e-06)  | 17 | 3 (8.11e-02)  | 18 | 14 (0.00e+00) | 71  | 40 (1.18e-03)  | 74  | 51 (5.86e-05)  | 73  | 53 (9.54e-13)  |
| <b>AML</b>  | 34 | 16 (2.18e-02) | 34 | 21 (5.04e-02) | 31 | 22 (8.31e-13) | 167 | 113 (9.89e-03) | 172 | 133 (1.97e-02) | 163 | 121 (2.56e-05) |
| <b>BLCA</b> | 22 | 2 (7.63e-01)  | 24 | 14 (2.69e-02) | 23 | 14 (3.15e-09) | 134 | 61 (1.07e-01)  | 142 | 99 (4.82e-03)  | 136 | 96 (5.68e-04)  |

|                    |     |                  |     |                  |     |                  |      |                   |      |                   |      |                   |
|--------------------|-----|------------------|-----|------------------|-----|------------------|------|-------------------|------|-------------------|------|-------------------|
| <b>BRCA</b>        | 126 | 61<br>(2.21e-02) | 135 | 95<br>(1.04e-02) | 125 | 86<br>(1.27e-03) | 1044 | 882<br>(1.53e-03) | 1094 | 922<br>(2.98e-02) | 1029 | 777<br>(8.34e-04) |
| <b>BRNCA</b>       | 17  | 4 (4.14e-02)     | 19  | 14<br>(8.51e-03) | 17  | 12<br>(5.59e-10) | 52   | 17<br>(1.36e-05)  | 57   | 42<br>(1.89e-02)  | 53   | 39<br>(7.80e-08)  |
| <b>CERV</b>        | 3   | 2<br>(0.00e+00)  | 4   | 1 (5.45e-01)     | 4   | 2 (4.69e-04)     | 5    | 2<br>(0.00e+00)   | 7    | 1 (5.79e-01)      | 7    | 2 (1.36e-03)      |
| <b>CHLCA</b>       | 3   | 1 (6.03e-01)     | 3   | 1 (8.29e-01)     | 3   | 3 (6.99e-04)     | 26   | 11<br>(3.46e-03)  | 26   | 18<br>(1.47e-02)  | 26   | 22<br>(6.46e-10)  |
| <b>CLL</b>         | 32  | 5 (1.89e-01)     | 33  | 11<br>(2.26e-05) | 29  | 9 (2.92e-07)     | 85   | 42<br>(1.31e-03)  | 90   | 53<br>(1.33e-03)  | 82   | 41<br>(2.77e-04)  |
| <b>CML</b>         | 2   | 1 (5.06e-01)     | 2   | 1 (5.17e-01)     | NA  | NA               | 2    | 1 (5.04e-01)      | 2    | 1 (5.20e-01)      | NA   | NA                |
| <b>CRCA</b>        | 67  | 26<br>(4.04e-03) | 68  | 56<br>(1.11e-04) | 68  | 51<br>(1.47e-03) | 672  | 489<br>(2.27e-04) | 700  | 518<br>(7.43e-03) | 680  | 415<br>(3.31e-04) |
| <b>DLBCL</b>       | 7   | 1 (5.30e-01)     | 8   | 2 (2.02e-01)     | 7   | 3 (2.35e-04)     | 57   | 30<br>(1.44e-03)  | 59   | 41<br>(1.04e-02)  | 55   | 45<br>(1.18e-07)  |
| <b>FLYMP<br/>H</b> | 7   | 1 (5.46e-01)     | 7   | 1 (6.87e-01)     | 7   | 2 (2.26e-01)     | 26   | 3 (2.71e-03)      | 28   | 3 (5.97e-01)      | 23   | 6 (5.00e-03)      |
| <b>HANC</b>        | 7   | 2 (8.07e-04)     | 7   | 3 (1.01e-01)     | 7   | 2 (8.68e-02)     | 51   | 34<br>(2.80e-06)  | 52   | 38<br>(4.60e-03)  | 51   | 40<br>(4.35e-09)  |
| <b>KDNC<br/>A</b>  | 17  | 5 (2.90e-02)     | 19  | 9 (5.55e-05)     | 17  | 5 (1.96e-05)     | 135  | 42<br>(2.49e-02)  | 146  | 85<br>(2.04e-02)  | 141  | 77<br>(1.68e-05)  |

|              |    |                  |    |                  |    |                  |     |                   |     |                   |     |                   |
|--------------|----|------------------|----|------------------|----|------------------|-----|-------------------|-----|-------------------|-----|-------------------|
| <b>LGCA</b>  | 33 | 12<br>(2.95e-02) | 37 | 24<br>(5.48e-02) | 34 | 24<br>(8.91e-11) | 245 | 146<br>(6.02e-03) | 261 | 191<br>(1.44e-02) | 241 | 184<br>(1.35e-05) |
| <b>LIVCA</b> | 35 | 15<br>(6.34e-03) | 35 | 21<br>(4.41e-02) | 35 | 28<br>(1.69e-05) | 469 | 329<br>(4.62e-02) | 486 | 371<br>(2.28e-01) | 480 | 378<br>(6.14e-07) |
| <b>OVCA</b>  | 34 | 15<br>(1.29e-04) | 35 | 29<br>(3.01e-03) | 31 | 24<br>(8.87e-07) | 144 | 86<br>(5.07e-03)  | 147 | 117<br>(8.41e-04) | 141 | 97<br>(4.94e-03)  |
| <b>PACA</b>  | 19 | 4 (2.17e-01)     | 20 | 10<br>(3.98e-02) | 19 | 13<br>(0.00e+00) | 103 | 42<br>(2.09e-02)  | 110 | 70<br>(4.10e-02)  | 104 | 86<br>(1.88e-05)  |
| <b>PRCA</b>  | 75 | 7 (3.57e-01)     | 79 | 38<br>(1.08e-02) | 73 | 27<br>(0.00e+00) | 654 | 480<br>(3.17e-02) | 679 | 574<br>(2.92e-03) | 649 | 491<br>(2.71e-09) |
| <b>SKCM</b>  | 32 | 14<br>(1.84e-04) | 34 | 22<br>(2.65e-02) | 32 | 24<br>(3.11e-11) | 234 | 121<br>(1.02e-01) | 249 | 163<br>(2.15e-01) | 240 | 142<br>(9.98e-03) |
| <b>STCA</b>  | 19 | 3 (4.40e-01)     | 20 | 8 (9.28e-02)     | 20 | 11<br>(3.06e-11) | 289 | 185<br>(4.79e-03) | 299 | 248<br>(6.99e-03) | 287 | 233<br>(7.93e-07) |
| <b>THCA</b>  | 13 | 4 (8.82e-02)     | 14 | 2 (7.93e-01)     | 11 | 8<br>(0.00e+00)  | 53  | 7 (6.22e-01)      | 55  | 32<br>(6.99e-02)  | 52  | 43<br>(2.30e-06)  |

**Table S28.** Significant interactome-based overlaps identified under all the tested settings. I1S (Interactome 1 stringent disease associated sets of genes and variant genes), I2S (Interactome 2 stringent disease associated sets of genes and variant genes), I3S (Interactome 3 stringent disease associated sets of genes and variant genes), I1R (Interactome 1 relaxed disease associated sets of genes and variant genes), I2R (Interactome 2 relaxed disease associated sets of genes and variant genes), I3R (Interactome 3 stringent relaxed associated sets of genes and variant genes).

| Disease A | Disease B | $S_{AB}$ | P-value_form |
|-----------|-----------|----------|--------------|
| I1S       |           |          |              |
| LGCA      | OVCA      | -0.54    | 8.98e-09     |
| LGCA      | STCA      | -0.41    | 3.02e-03     |
| CRCA      | LGCA      | -0.28    | 6.30e-03     |
| CRCA      | OVCA      | -0.28    | 7.00e-03     |
| BRCA      | PRCA      | -0.18    | 8.70e-03     |
| BRNCA     | LGCA      | -0.35    | 2.27e-02     |
| BRCA      | LGCA      | -0.17    | 4.31e-02     |
| I2S       |           |          |              |
| LGCA      | OVCA      | -0.39    | 1.13e-05     |
| BRCA      | LGCA      | -0.13    | 1.06e-02     |
| CRCA      | OVCA      | -0.23    | 1.40e-02     |
| I3S       |           |          |              |
| LGCA      | OVCA      | -0.4     | 1.68e-02     |
| I1R       |           |          |              |
| LIVCA     | PRCA      | -0.15    | 3.36e-07     |
| LGCA      | PRCA      | -0.15    | 9.20e-07     |
| BRCA      | CRCA      | -0.15    | 1.43e-06     |
| LGCA      | LIVCA     | -0.16    | 7.59e-06     |
| LGCA      | OVCA      | -0.2     | 1.18e-05     |
| LGCA      | STCA      | -0.18    | 1.40e-05     |
| LIVCA     | STCA      | -0.15    | 3.07e-05     |
| BLCA      | PACA      | -0.22    | 7.63e-05     |
| PRCA      | STCA      | -0.12    | 1.21e-04     |
| BLCA      | LGCA      | -0.16    | 1.93e-03     |
| OVCA      | PACA      | -0.2     | 3.24e-03     |
| BRCA      | PRCA      | -0.12    | 4.94e-03     |
| CHLCA     | THCA      | -0.3     | 9.00e-03     |
| SKCM      | THCA      | -0.11    | 1.43e-02     |
| PRCA      | SKCM      | -0.09    | 1.99e-02     |
| ALL       | AML       | -0.15    | 4.06e-02     |
| I2R       |           |          |              |
| LGCA      | PRCA      | -0.16    | 1.73e-14     |
| BRCA      | CRCA      | -0.17    | 3.18e-13     |
| PRCA      | STCA      | -0.13    | 1.79e-09     |
| LGCA      | OVCA      | -0.21    | 3.64e-09     |
| LGCA      | LIVCA     | -0.14    | 3.39e-08     |
| LGCA      | STCA      | -0.17    | 1.00e-07     |
| BRCA      | PRCA      | -0.14    | 2.48e-07     |
| LIVCA     | PRCA      | -0.14    | 5.07e-07     |
| BRCA      | LGCA      | -0.06    | 4.54e-06     |
| CRCA      | LGCA      | -0.09    | 2.38e-05     |
| BRCA      | LIVCA     | -0.1     | 1.13e-04     |
| LIVCA     | STCA      | -0.12    | 3.07e-04     |
| BLCA      | LGCA      | -0.14    | 8.12e-04     |
| LGCA      | SKCM      | -0.14    | 1.47e-03     |
| CRCA      | PRCA      | -0.12    | 2.13e-03     |
| BLCA      | LIVCA     | -0.08    | 3.77e-03     |
| OVCA      | PRCA      | -0.03    | 5.34e-03     |
| BRCA      | SKCM      | -0.03    | 9.11e-03     |
| OVCA      | PACA      | -0.15    | 3.62e-02     |
| OVCA      | STCA      | -0.1     | 3.85e-02     |



| I3R   |      |       |          |
|-------|------|-------|----------|
| LGCA  | OVCA | -0.18 | 1.98e-05 |
| PRCA  | STCA | -0.09 | 2.80e-05 |
| LGCA  | PRCA | -0.07 | 4.33e-04 |
| BRCA  | CRCA | -0.15 | 8.33e-04 |
| BRCA  | PRCA | -0.13 | 9.54e-04 |
| OVCA  | PRCA | -0.01 | 1.87e-03 |
| LIVCA | PRCA | -0.12 | 3.66e-03 |
| LIVCA | STCA | -0.1  | 1.19e-02 |

**Table S29.** Significant genetic correlations between dataset pairs. The first and the second column shows the involved datasets. Column three presents the measured genetic correlation between each pair. Column four shows the standard error of the computed genetic correlations. Finally, columns five and six indicate the z-scores and the raw p-values linked to each association.

| A) Significant genetic correlations between pairs of studies targeting the same disorder |           |              |      |        |          |
|------------------------------------------------------------------------------------------|-----------|--------------|------|--------|----------|
| Disease 1                                                                                | Disease 2 | Rg (Cambiar) | SE   | z      | p        |
| AD 1                                                                                     | AD 2      | 1.8          | 0.33 | 5.54   | 3.09e-08 |
| AD 2                                                                                     | AD 3      | 0.92         | 0.14 | 6.4    | 1.60e-10 |
| PD 1                                                                                     | PD 2      | 0.86         | 0.06 | 13.44  | 3.51e-41 |
| BRCA 1                                                                                   | BRCA 2    | 1.02         | 0    | 233.42 | 0.00e+00 |
| BRCA 1                                                                                   | BRCA 3    | 0.93         | 0.08 | 11.89  | 1.26e-32 |
| BRCA 2                                                                                   | BRCA 3    | 1            | 0.06 | 17.17  | 4.47e-66 |
| PRCA 2                                                                                   | PRCA 3    | 1.04         | 0.05 | 20.58  | 4.59e-94 |
| SKCM 1                                                                                   | SKCM 2    | 1.24         | 0.28 | 4.48   | 7.49e-06 |
| B) Significant genetic correlations between pairs of CNS disorders                       |           |              |      |        |          |
| Disease 1                                                                                | Disease 2 | Rg (Cambiar) | SE   | z      | p        |
| AD 3                                                                                     | PD 1      | 0.21         | 0.08 | 2.51   | 1.21e-02 |
| C) Significant genetic correlations between pairs of cancers                             |           |              |      |        |          |
| Disease 1                                                                                | Disease 2 | Rg (Cambiar) | SE   | z      | p        |
| BRCA 2                                                                                   | OVCA 1    | 0.23         | 0.06 | 3.68   | 2.00e-04 |
| BRCA 2                                                                                   | SKCM 2    | 0.12         | 0.04 | 2.68   | 7.40e-03 |
| BRCA 3                                                                                   | CRCA 1    | -0.22        | 0.13 | -1.74  | 8.11e-02 |
| PRCA 2                                                                                   | BRCA 1    | 0.11         | 0.05 | 2.32   | 2.01e-02 |
| PRCA 2                                                                                   | BRCA 2    | 0.07         | 0.03 | 2.41   | 1.59e-02 |
| PRCA 3                                                                                   | BRCA 2    | 0.11         | 0.04 | 2.56   | 1.05e-02 |
| D) Significant genetic correlations between CNS disorders and cancers                    |           |              |      |        |          |
| Disease 1                                                                                | Disease 2 | Rg (Cambiar) | SE   | z      | p        |
| PD 1                                                                                     | PRCA 2    | 0.09         | 0.04 | 2.15   | 3.16e-02 |
| PD 1                                                                                     | SKCM 2    | 0.14         | 0.07 | 2.01   | 4.41e-02 |
| PD 2                                                                                     | PRCA 3    | 0.16         | 0.08 | 2.01   | 4.44e-02 |

**Table S30.** Drugs indicated for the treatment of AD, PD and the included cancer types with available LINCS L1000 gene expression signatures.

| Disorder | DB_ID   | LINCS perturbation ID | name                          |
|----------|---------|-----------------------|-------------------------------|
| AD       | DB00674 | BRD-K49481516         | Galantamine                   |
| AD       | DB01043 | BRD-A79803969         | Memantine                     |
| AD       | DB01037 | BRD-K86434416         | Selegiline                    |
| AD       | DB00382 | BRD-K81473089         | Tacrine                       |
| AD       | DB00313 | BRD-K41260949         | Valproic acid                 |
| AD       | DB00163 |                       | Vitamin E                     |
| AD       | DB14003 |                       | alpha-Tocopherol acetate      |
| AD       | DB00843 | BRD-A49160188         | Donepezil                     |
| AD       | DB00989 | BRD-K10706131         | Rivastigmine                  |
| AD       | DB14477 |                       | DL-alpha tocopheryl acetate   |
| PD       | DB00915 | BRD-K70330367         | Amantadine                    |
| PD       | DB00714 | BRD-K76022557         | Apomorphine                   |
| PD       | DB00245 |                       | Benzatropine                  |
| PD       | DB00810 | BRD-A00546892         | Biperiden                     |
| PD       | DB01200 |                       | Bromocriptine                 |
| PD       | DB00190 | BRD-K78712176         | Carbidopa                     |
| PD       | DB01235 | BRD-K34730807         | Levodopa                      |
| PD       | DB01186 | BRD-K60770992         | Pergolide                     |
| PD       | DB01037 | BRD-K86434416         | Selegiline                    |
| PD       | DB00376 | BRD-A48180038         | Trihexyphenidyl               |
| PD       | DB00248 | BRD-K86882815         | Cabergoline                   |
| PD       | DB00494 | BRD-K83636919         | Entacapone                    |
| PD       | DB00268 | BRD-K15933101         | Ropinirole                    |
| PD       | DB00323 | BRD-K10852020         | Tolcapone                     |
| PD       | DB01367 | BRD-K58114536         | Rasagiline                    |
| PD       | DB00424 |                       | Hyoscyamine                   |
| PD       | DB00989 | BRD-K10706131         | Rivastigmine                  |
| PD       | DB05271 | BRD-K91111634         | Rotigotine                    |
| PD       | DB00413 | BRD-K06388322         | Pramipexole                   |
| ALL      | DB01033 | BRD-K91601245         | Mercaptopurine                |
| ALL      | DB00023 |                       | Asparaginase Escherichia coli |
| ALL      | DB00987 | BRD-K33106058         | Cytarabine                    |
| ALL      | DB00694 | BRD-K43389675         | Daunorubicin                  |
| ALL      | DB00997 | BRD-K92093830         | Doxorubicin                   |
| ALL      | DB00444 |                       | Teniposide                    |
| ALL      | DB00059 |                       | Pegaspargase                  |
| ALL      | DB00631 | BRD-K34022604         | Clofarabine                   |
| ALL      | DB00619 | BRD-K92723993         | Imatinib                      |
| AML      | DB00023 |                       | Asparaginase Escherichia coli |
| AML      | DB00987 | BRD-K33106058         | Cytarabine                    |
| AML      | DB00694 | BRD-K43389675         | Daunorubicin                  |
| AML      | DB00997 | BRD-K92093830         | Doxorubicin                   |
| AML      | DB00773 | BRD-K37798499         | Etoposide                     |
| AML      | DB01177 | BRD-K69650333         | Idarubicin                    |
| AML      | DB01204 | BRD-K21680192         | Mitoxantrone                  |
| AML      | DB00352 | BRD-K49350383         | Tioguanine                    |
| AML      | DB00755 | BRD-K71879491         | Tretinoin                     |
| AML      | DB01169 |                       | Arsenic trioxide              |
| AML      | DB00020 |                       | Sargramostim                  |
| AML      | DB00056 |                       | Gemtuzumab ozogamicin         |
| BLCA     | DB00305 |                       | Mitomycin                     |
| BLCA     | DB00515 |                       | Cisplatin                     |
| BLCA     | DB00997 | BRD-K92093830         | Doxorubicin                   |
| BLCA     | DB00773 | BRD-K37798499         | Etoposide                     |
| BLCA     | DB00544 | BRD-K24844714         | Fluorouracil                  |
| BLCA     | DB04572 | BRD-K09631521         | Thiotepa                      |
| BLCA     | DB00441 | BRD-K15108141         | Gemcitabine                   |

|       |         |               |                                                              |
|-------|---------|---------------|--------------------------------------------------------------|
| BLCA  | DB00385 | BRD-K72951360 | Valrubicin                                                   |
| BLCA  | DB00958 |               | Carboplatin                                                  |
| BLCA  | DB10804 |               | Bacillus calmette-guerin substrain<br>connaught live antigen |
| BLCA  | DB10343 |               | Bacillus calmette-guerin substrain<br>tice live antigen      |
| BRCA  | DB00445 | BRD-K04548931 | Epirubicin                                                   |
| BRCA  | DB00783 | BRD-K18910433 | Estradiol                                                    |
| BRCA  | DB00286 |               | Conjugated estrogens                                         |
| BRCA  | DB00544 | BRD-K24844714 | Fluorouracil                                                 |
| BRCA  | DB01185 |               | Fluoxymesterone                                              |
| BRCA  | DB01181 | BRD-A67097164 | Ifosfamide                                                   |
| BRCA  | DB00563 | BRD-K59456551 | Methotrexate                                                 |
| BRCA  | DB06710 | BRD-K84036904 | Methyltestosterone                                           |
| BRCA  | DB00675 | BRD-K93754473 | Tamoxifen                                                    |
| BRCA  | DB00894 |               | Testolactone                                                 |
| BRCA  | DB00624 |               | Testosterone                                                 |
| BRCA  | DB04572 | BRD-K09631521 | Thiotepa                                                     |
| BRCA  | DB00282 |               | Pamidronic acid                                              |
| BRCA  | DB00441 | BRD-K15108141 | Gemcitabine                                                  |
| BRCA  | DB00351 | BRD-K19507340 | Megestrol acetate                                            |
| BRCA  | DB00539 | BRD-K51350053 | Toremifene                                                   |
| BRCA  | DB00361 |               | Vinorelbine                                                  |
| BRCA  | DB00380 | BRD-K07265709 | Dexrazoxane                                                  |
| BRCA  | DB00014 | BRD-K99504665 | Goserelin                                                    |
| BRCA  | DB01229 |               | Paclitaxel                                                   |
| BRCA  | DB00481 | BRD-K63828191 | Raloxifene                                                   |
| BRCA  | DB01006 | BRD-K88789588 | Letrozole                                                    |
| BRCA  | DB01217 | BRD-K52172416 | Anastrozole                                                  |
| BRCA  | DB01101 | BRD-K61192372 | Capecitabine                                                 |
| BRCA  | DB09381 |               | Esterified estrogens                                         |
| BRCA  | DB00072 |               | Trastuzumab                                                  |
| BRCA  | DB00112 |               | Bevacizumab                                                  |
| BRCA  | DB00990 | BRD-K33425534 | Exemestane                                                   |
| BRCA  | DB00947 |               | Fulvestrant                                                  |
| BRCA  | DB04845 | BRD-K03601870 | Ixabepilone                                                  |
| BRCA  | DB01259 | BRD-M07438658 | Lapatinib                                                    |
| BRCA  | DB01259 | BRD-K19687926 | Lapatinib                                                    |
| BRCA  | DB08871 |               | Eribulin                                                     |
| BRNCA | DB00262 |               | Carmustine                                                   |
| BRNCA | DB00515 |               | Cisplatin                                                    |
| BRNCA | DB00853 | BRD-K32107296 | Temozolomide                                                 |
| CERV  | DB00515 |               | Cisplatin                                                    |
| CERV  | DB01181 | BRD-A67097164 | Ifosfamide                                                   |
| CERV  | DB01030 | BRD-K55696337 | Topotecan                                                    |
| CLL   | DB01033 | BRD-K91601245 | Mercaptopurine                                               |
| CLL   | DB00291 | BRD-K29458283 | Chlorambucil                                                 |
| CLL   | DB00773 | BRD-K37798499 | Etoposide                                                    |
| CLL   | DB01181 | BRD-A67097164 | Ifosfamide                                                   |
| CLL   | DB00888 |               | Mechlorethamine                                              |
| CLL   | DB00552 |               | Pentostatin                                                  |
| CLL   | DB01073 | BRD-K66788707 | Fludarabine                                                  |
| CLL   | DB00059 |               | Pegaspargase                                                 |
| CLL   | DB00242 | BRD-K93034159 | Cladribine                                                   |
| CLL   | DB00087 |               | Alemtuzumab                                                  |
| CLL   | DB06769 | BRD-K17068645 | Bendamustine                                                 |
| CLL   | DB06650 |               | Ofatumumab                                                   |
| CML   | DB01008 | BRD-K23204545 | Busulfan                                                     |
| CML   | DB00987 | BRD-K33106058 | Cytarabine                                                   |
| CML   | DB01005 | BRD-K51747290 | Hydroxyurea                                                  |
| CML   | DB01177 | BRD-K69650333 | Idarubicin                                                   |

|       |         |               |                                 |
|-------|---------|---------------|---------------------------------|
| CML   | DB00105 |               | Interferon alfa-2b              |
| CML   | DB06810 |               | Plicamycin                      |
| CML   | DB00352 | BRD-K49350383 | Tioguanine                      |
| CML   | DB00619 | BRD-K92723993 | Imatinib                        |
| CRCA  | DB00544 | BRD-K24844714 | Fluorouracil                    |
| CRCA  | DB00526 |               | Oxaliplatin                     |
| CRCA  | DB00762 | BRD-K08547377 | Irinotecan                      |
| CRCA  | DB01101 | BRD-K61192372 | Capecitabine                    |
| CRCA  | DB00112 |               | Bevacizumab                     |
| CRCA  | DB00002 |               | Cetuximab                       |
| HANC  | DB00290 |               | Bleomycin                       |
| HANC  | DB00515 |               | Cisplatin                       |
| HANC  | DB00570 | BRD-K01188359 | Vinblastine                     |
| HANC  | DB00958 |               | Carboplatin                     |
| HANC  | DB01229 |               | Paclitaxel                      |
| KDNCA | DB00970 | BRD-K70578146 | Dactinomycin                    |
| KDNCA | DB01005 | BRD-K51747290 | Hydroxyurea                     |
| KDNCA | DB00034 |               | Interferon alfa-2a, Recombinant |
| KDNCA | DB00105 |               | Interferon alfa-2b              |
| KDNCA | DB00033 |               | Interferon gamma-1b             |
| KDNCA | DB01041 | BRD-A93255169 | Thalidomide                     |
| KDNCA | DB00541 | BRD-K82109576 | Vincristine                     |
| KDNCA | DB00069 |               | Interferon alfacon-1            |
| KDNCA | DB00041 |               | Aldesleukin                     |
| KDNCA | DB00008 |               | Peginterferon alfa-2a           |
| KDNCA | DB01590 | BRD-K13514097 | Everolimus                      |
| KDNCA | DB00112 |               | Bevacizumab                     |
| KDNCA | DB00022 |               | Peginterferon alfa-2b           |
| KDNCA | DB01268 | BRD-M64432851 | Sunitinib                       |
| KDNCA | DB01268 | BRD-K42828737 | Sunitinib                       |
| KDNCA | DB00398 | BRD-K23984367 | Sorafenib                       |
| KDNCA | DB06287 |               | Temsirolimus                    |
| KDNCA | DB06589 | BRD-K74514084 | Pazopanib                       |
| KDNCA | DB00603 | BRD-K82216340 | Medroxyprogesterone acetate     |
| LGCA  | DB00515 |               | Cisplatin                       |
| LGCA  | DB00445 | BRD-K04548931 | Epirubicin                      |
| LGCA  | DB00773 | BRD-K37798499 | Etoposide                       |
| LGCA  | DB01005 | BRD-K51747290 | Hydroxyurea                     |
| LGCA  | DB01181 | BRD-A67097164 | Ifosfamide                      |
| LGCA  | DB00563 | BRD-K59456551 | Methotrexate                    |
| LGCA  | DB01168 | BRD-K13032584 | Procarbazine                    |
| LGCA  | DB00570 | BRD-K01188359 | Vinblastine                     |
| LGCA  | DB00441 | BRD-K15108141 | Gemcitabine                     |
| LGCA  | DB00361 |               | Vinorelbine                     |
| LGCA  | DB00958 |               | Carboplatin                     |
| LGCA  | DB00762 | BRD-K08547377 | Irinotecan                      |
| LGCA  | DB01229 |               | Paclitaxel                      |
| LGCA  | DB01030 | BRD-K55696337 | Topotecan                       |
| LGCA  | DB00642 |               | Pemetrexed                      |
| LGCA  | DB00112 |               | Bevacizumab                     |
| LGCA  | DB00317 | BRD-K64052750 | Gefitinib                       |
| LGCA  | DB00530 | BRD-K70401845 | Erlotinib                       |
| LGCA  | DB08865 | BRD-K78431006 | Crizotinib                      |
| LIVCA | DB00034 |               | Interferon alfa-2a, Recombinant |
| LIVCA | DB00105 |               | Interferon alfa-2b              |
| LIVCA | DB00033 |               | Interferon gamma-1b             |
| LIVCA | DB00069 |               | Interferon alfacon-1            |
| LIVCA | DB00008 |               | Peginterferon alfa-2a           |
| LIVCA | DB00022 |               | Peginterferon alfa-2b           |
| LIVCA | DB00398 | BRD-K23984367 | Sorafenib                       |
| OVCA  | DB00515 |               | Cisplatin                       |

|       |         |               |                                 |
|-------|---------|---------------|---------------------------------|
| OVCA  | DB01005 | BRD-K51747290 | Hydroxyurea                     |
| PACA  | DB00997 | BRD-K92093830 | Doxorubicin                     |
| PACA  | DB00544 | BRD-K24844714 | Fluorouracil                    |
| PACA  | DB00441 | BRD-K15108141 | Gemcitabine                     |
| PACA  | DB00530 | BRD-K70401845 | Erlotinib                       |
| PRCA  | DB00513 | BRD-K64931368 | Aminocaproic acid               |
| PRCA  | DB00997 | BRD-K92093830 | Doxorubicin                     |
| PRCA  | DB00783 | BRD-K18910433 | Estradiol                       |
| PRCA  | DB01196 |               | Estramustine                    |
| PRCA  | DB00286 |               | Conjugated estrogens            |
| PRCA  | DB00499 | BRD-K28307902 | Flutamide                       |
| PRCA  | DB01026 | BRD-A76019558 | Ketoconazole                    |
| PRCA  | DB01204 | BRD-K21680192 | Mitoxantrone                    |
| PRCA  | DB01041 | BRD-A93255169 | Thalidomide                     |
| PRCA  | DB00351 | BRD-K19507340 | Megestrol acetate               |
| PRCA  | DB00665 | BRD-K23566484 | Nilutamide                      |
| PRCA  | DB06825 | BRD-K62685538 | Triptorelin                     |
| PRCA  | DB00007 |               | Leuprolide                      |
| PRCA  | DB00014 | BRD-K99504665 | Goserelin                       |
| PRCA  | DB06788 |               | Histrelin                       |
| PRCA  | DB01128 | BRD-A29485665 | Bicalutamide                    |
| PRCA  | DB09381 |               | Esterified estrogens            |
| PRCA  | DB00106 |               | Abarelix                        |
| PRCA  | DB06699 |               | Degarelix                       |
| PRCA  | DB06643 |               | Denosumab                       |
| PRCA  | DB06772 |               | Cabazitaxel                     |
| PRCA  | DB06688 |               | Sipuleucel-T                    |
| PRCA  | DB05812 |               | Abiraterone                     |
| SKCM  | DB00290 |               | Bleomycin                       |
| SKCM  | DB00262 |               | Carmustine                      |
| SKCM  | DB00851 |               | Dacarbazine                     |
| SKCM  | DB00970 | BRD-K70578146 | Dactinomycin                    |
| SKCM  | DB01005 | BRD-K51747290 | Hydroxyurea                     |
| SKCM  | DB00034 |               | Interferon alfa-2a, Recombinant |
| SKCM  | DB00105 |               | Interferon alfa-2b              |
| SKCM  | DB00033 |               | Interferon gamma-1b             |
| SKCM  | DB01206 |               | Lomustine                       |
| SKCM  | DB01042 |               | Melphalan                       |
| SKCM  | DB01168 | BRD-K13032584 | Procarbazine                    |
| SKCM  | DB00853 | BRD-K32107296 | Temozolomide                    |
| SKCM  | DB00069 |               | Interferon alfacon-1            |
| SKCM  | DB00041 |               | Aldesleukin                     |
| SKCM  | DB00008 |               | Peginterferon alfa-2a           |
| SKCM  | DB00022 |               | Peginterferon alfa-2b           |
| SKCM  | DB06186 |               | Ipilimumab                      |
| SKCM  | DB08881 | BRD-K56343971 | Vemurafenib                     |
| STCA  | DB00305 |               | Mitomycin                       |
| STCA  | DB00445 | BRD-K04548931 | Epirubicin                      |
| STCA  | DB00544 | BRD-K24844714 | Fluorouracil                    |
| STCA  | DB01101 | BRD-K61192372 | Capecitabine                    |
| THCA  | DB05294 | BRD-K77625799 | Vandetanib                      |
| LYMPH | DB01033 | BRD-K91601245 | Mercaptopurine                  |
| LYMPH | DB00023 |               | Asparaginase Escherichia coli   |
| LYMPH | DB00290 |               | Bleomycin                       |
| LYMPH | DB00262 |               | Carmustine                      |
| LYMPH | DB00291 | BRD-K29458283 | Chlorambucil                    |
| LYMPH | DB00515 |               | Cisplatin                       |
| LYMPH | DB00987 | BRD-K33106058 | Cytarabine                      |
| LYMPH | DB00851 |               | Dacarbazine                     |
| LYMPH | DB00997 | BRD-K92093830 | Doxorubicin                     |
| LYMPH | DB00445 | BRD-K04548931 | Epirubicin                      |

|       |         |               |                     |
|-------|---------|---------------|---------------------|
| LYMPH | DB00773 | BRD-K37798499 | Etoposide           |
| LYMPH | DB01181 | BRD-A67097164 | Ifosfamide          |
| LYMPH | DB00105 |               | Interferon alfa-2b  |
| LYMPH | DB01206 |               | Lomustine           |
| LYMPH | DB00888 |               | Mechlorethamine     |
| LYMPH | DB00563 | BRD-K59456551 | Methotrexate        |
| LYMPH | DB01204 | BRD-K21680192 | Mitoxantrone        |
| LYMPH | DB00860 |               | Prednisolone        |
| LYMPH | DB00635 |               | Prednisone          |
| LYMPH | DB01168 | BRD-K13032584 | Procarbazine        |
| LYMPH | DB00428 | BRD-K34411947 | Streptozocin        |
| LYMPH | DB04572 | BRD-K09631521 | Thiotepa            |
| LYMPH | DB00570 | BRD-K01188359 | Vinblastine         |
| LYMPH | DB00541 | BRD-K82109576 | Vincristine         |
| LYMPH | DB00441 | BRD-K15108141 | Gemcitabine         |
| LYMPH | DB01073 | BRD-K66788707 | Fludarabine         |
| LYMPH | DB00059 |               | Pegaspargase        |
| LYMPH | DB00361 |               | Vinorelbine         |
| LYMPH | DB00242 | BRD-K93034159 | Cladribine          |
| LYMPH | DB00762 | BRD-K08547377 | Irinotecan          |
| LYMPH | DB00020 |               | Sargramostim        |
| LYMPH | DB00041 |               | Aldesleukin         |
| LYMPH | DB00087 |               | Alemtuzumab         |
| LYMPH | DB00073 |               | Rituximab           |
| LYMPH | DB06769 | BRD-K17068645 | Bendamustine        |
| LYMPH | DB02546 | BRD-K81418486 | Vorinostat          |
| LYMPH | DB00004 |               | Denileukin diftitox |
| LYMPH | DB00307 | BRD-K92441787 | Bexarotene          |
| LYMPH | DB00081 |               | Tositumomab         |
| LYMPH | DB01280 | BRD-K84466663 | Nelarabine          |
| LYMPH | DB00049 |               | Rasburicase         |
| LYMPH | DB00188 | BRD-K88510285 | Bortezomib          |
| LYMPH | DB06813 | BRD-A74914197 | Pralatrexate        |
| LYMPH | DB06809 | BRD-K33240821 | Plerixafor          |
| LYMPH | DB06176 | BRD-K61397605 | Romidepsin          |
| LYMPH | DB08870 |               | Brentuximab vedotin |

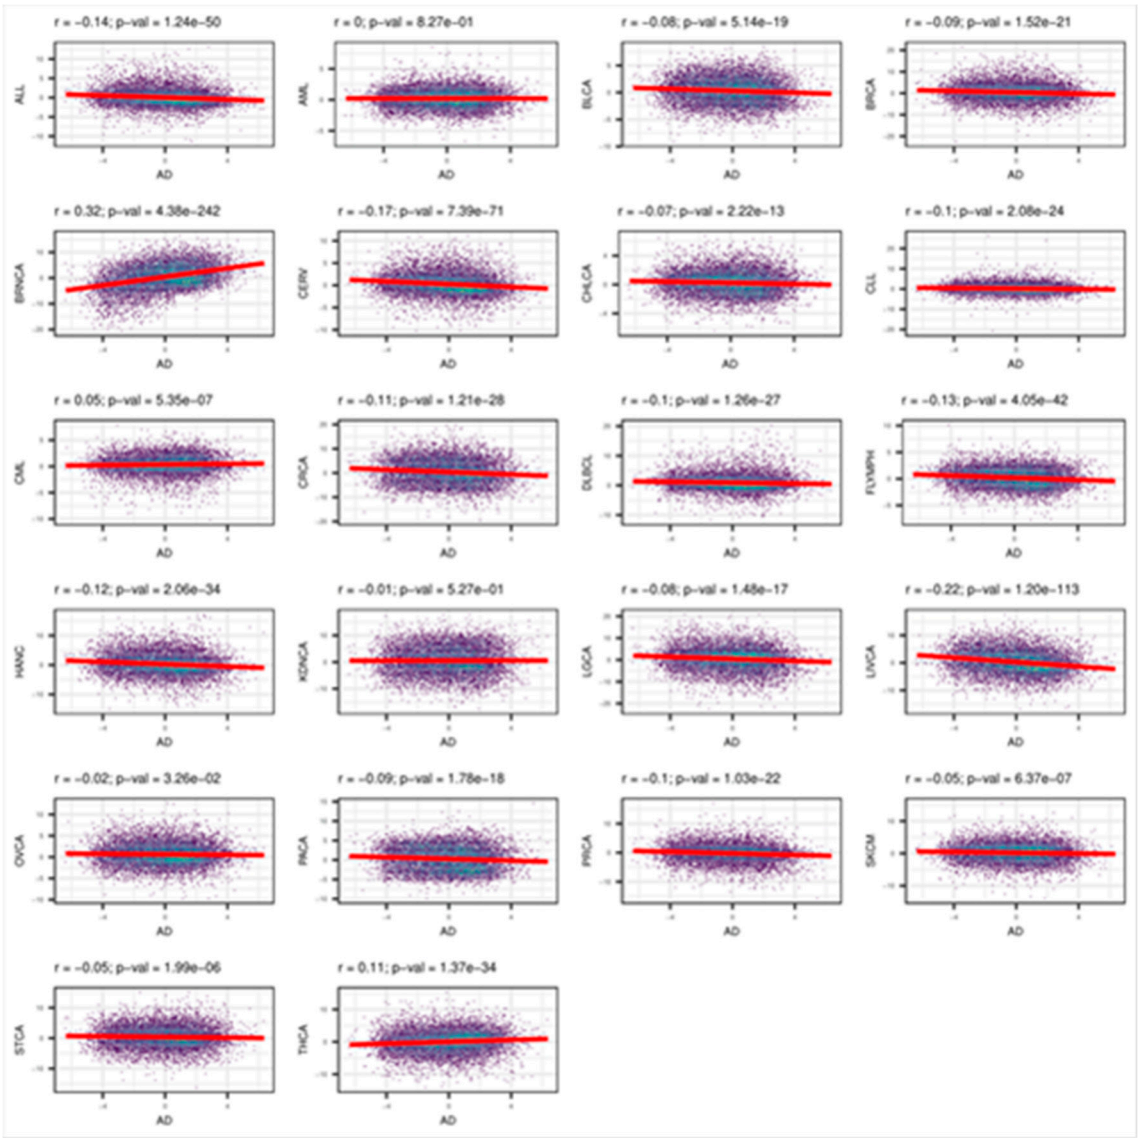

**Figure S1.** Pearson's correlations of the  $\hat{\mu}$  values derived from the differential expression profiles of AD and all the included cancers.

8

9

10



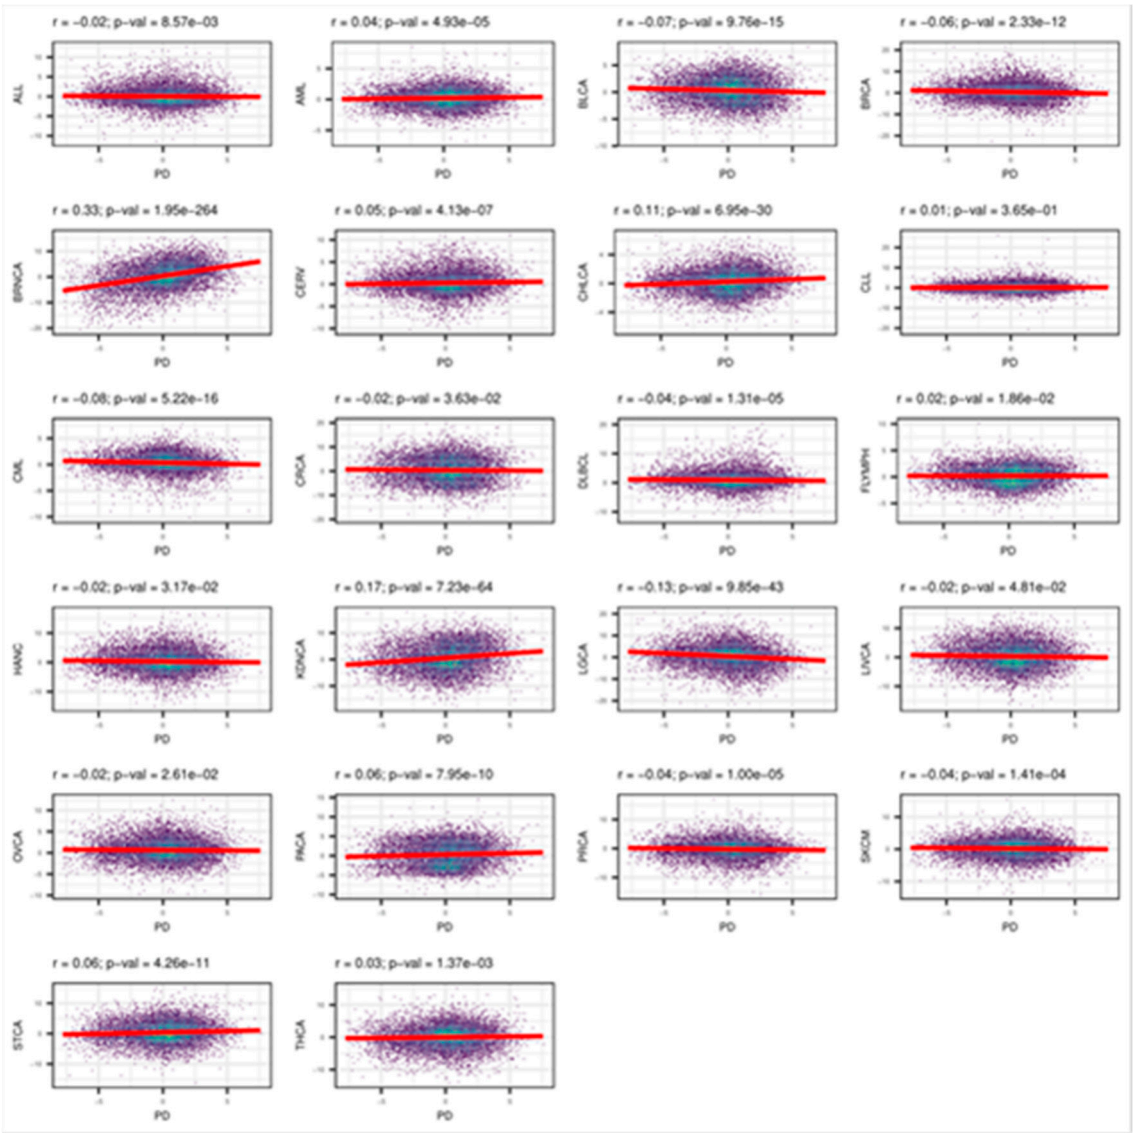

**Figure S2.** Pearson's correlations of the  $\hat{\mu}$  values derived from the differential expression profiles of PD and all the included cancers.

11  
12  
13

|         |                |                 |                |                 |
|---------|----------------|-----------------|----------------|-----------------|
| AD THCA | 455 (1.00e+00) | 577 (1.00e+00)  | 475 (1.71e-02) | 836 (1.19e-04)  |
| AD STAD | 426 (1.00e+00) | 613 (7.63e-02)  | 422 (1.74e-03) | 617 (1.00e+00)  |
| AD READ | 365 (1.00e+00) | 465 (1.00e+00)  | 406 (1.62e-10) | 641 (1.00e+00)  |
| AD PRAD | 375 (1.00e+00) | 516 (1.00e+00)  | 545 (2.47e-18) | 916 (6.64e-09)  |
| AD PAAD | 8 (1.00e+00)   | 28 (1.00e+00)   | 129 (5.98e-19) | 7 (1.00e+00)    |
| AD LUSC | 467 (1.00e+00) | 467 (1.00e+00)  | 603 (2.27e-30) | 1239 (3.37e-25) |
| AD LUAD | 507 (1.00e+00) | 422 (1.00e+00)  | 527 (6.22e-28) | 1171 (6.65e-11) |
| AD LIHC | 531 (1.00e+00) | 319 (1.00e+00)  | 360 (1.19e-11) | 1154 (6.65e-11) |
| AD KIRC | 712 (2.17e-07) | 851 (1.29e-17)  | 382 (1.00e+00) | 766 (1.00e+00)  |
| AD KICH | 463 (1.00e+00) | 517 (1.00e+00)  | 456 (1.02e-06) | 910 (1.80e-04)  |
| AD HNSC | 539 (7.63e-01) | 577 (1.00e+00)  | 432 (6.07e-04) | 823 (1.00e+00)  |
| AD GBM  | 738 (1.22e-71) | 875 (5.54e-114) | 72 (1.00e+00)  | 357 (1.00e+00)  |
| AD COAD | 470 (1.00e+00) | 584 (1.00e+00)  | 530 (1.89e-12) | 953 (1.10e-01)  |
| AD CHOL | 489 (1.00e+00) | 321 (1.00e+00)  | 271 (2.58e-03) | 727 (1.00e+00)  |
| AD CESC | 181 (1.00e+00) | 223 (1.00e+00)  | 262 (1.45e-14) | 260 (1.00e+00)  |
| AD BRCA | 580 (1.00e+00) | 438 (1.00e+00)  | 513 (6.60e-14) | 1282 (5.56e-20) |
| AD BLCA | 322 (1.00e+00) | 316 (1.00e+00)  | 374 (1.17e-15) | 778 (1.32e-04)  |
|         | UP UP          | DOWN DOWN       | UP DOWN        | DOWN UP         |

**Figure S3.** Intersection analysis results for AD and the TCGA-derived cancer data. Bladder Urothelial Carcinoma (BLCA), Breast Invasive Carcinoma (BRCA), Glioblastoma Multiforme (GBM), Cervical Squamous Cell Carcinoma and Endocervical Adenocarcinoma (CESC), Cholangiocarcinoma (CHOL), Colon Adenocarcinoma (COAD), Rectum Adenocarcinoma (READ), Head and Neck Squamous Cell Carcinoma (HNSC), Kidney Chromophobe (KICH), Kidney Renal Clear Cell Carcinoma (KIRC), Lung Adenocarcinoma (LUAD), Lung Squamous Cell Carcinoma (LUSC), Liver Hepatocellular Carcinoma (LIHC), Pancreatic Adenocarcinoma (PAAD), Prostate Adenocarcinoma (PRAD), Stomach Adenocarcinoma (STAD), Thyroid Carcinoma (THCA).

14

15

16

17

18

19

20

21

|         |                |                |                |                 |
|---------|----------------|----------------|----------------|-----------------|
| PD THCA | 536 (1.00e+00) | 559 (1.00e+00) | 605 (8.88e-04) | 686 (1.42e-01)  |
| PD STAD | 589 (7.94e-02) | 596 (5.83e-07) | 407 (1.00e+00) | 499 (1.00e+00)  |
| PD READ | 499 (1.00e+00) | 475 (2.24e-03) | 407 (1.32e-01) | 518 (1.00e+00)  |
| PD PRAD | 549 (1.00e+00) | 511 (1.00e+00) | 533 (2.74e-02) | 752 (2.43e-02)  |
| PD PAAD | 6 (1.00e+00)   | 27 (1.00e+00)  | 110 (1.83e-06) | 7 (1.00e+00)    |
| PD LUSC | 637 (1.00e+00) | 450 (1.00e+00) | 661 (3.74e-18) | 1026 (5.43e-10) |
| PD LUAD | 658 (1.00e+00) | 412 (1.00e+00) | 557 (8.72e-14) | 995 (5.28e-05)  |
| PD LIHC | 766 (1.00e+00) | 289 (1.00e+00) | 345 (7.76e-02) | 962 (3.47e-04)  |
| PD KIRC | 934 (1.08e-19) | 802 (1.13e-28) | 385 (1.00e+00) | 612 (1.00e+00)  |
| PD KICH | 565 (1.00e+00) | 460 (1.00e+00) | 511 (8.56e-03) | 789 (1.62e-03)  |
| PD HNSC | 684 (1.20e-01) | 551 (2.43e-02) | 390 (1.00e+00) | 672 (1.00e+00)  |
| PD GBM  | 729 (4.46e-17) | 736 (3.02e-87) | 218 (1.00e+00) | 341 (1.00e+00)  |
| PD COAD | 672 (1.00e+00) | 576 (6.12e-01) | 571 (1.13e-03) | 778 (1.00e+00)  |
| PD CHOL | 602 (8.66e-01) | 325 (4.15e-01) | 242 (1.00e+00) | 643 (1.00e+00)  |
| PD CESC | 168 (1.00e+00) | 227 (9.87e-01) | 251 (5.20e-04) | 215 (1.00e+00)  |
| PD BRCA | 713 (1.00e+00) | 439 (1.00e+00) | 604 (9.70e-13) | 1083 (1.04e-09) |
| PD BLCA | 481 (1.00e+00) | 329 (1.00e+00) | 380 (8.54e-05) | 604 (1.00e+00)  |
|         | UP UP          | DOWN DOWN      | UP DOWN        | DOWN UP         |

**Figure S4.** Intersection analysis results for PD and the TCGA-derived cancer data. Bladder Urothelial Carcinoma (BLCA), Breast Invasive Carcinoma (BRCA), Glioblastoma Multiforme (GBM), Cervical Squamous Cell Carcinoma and Endocervical Adenocarcinoma (CESC), Cholangiocarcinoma (CHOL), Colon Adenocarcinoma (COAD), Rectum Adenocarcinoma (READ), Head and Neck Squamous Cell Carcinoma (HNSC), Kidney Chromophobe (KICH), Kidney Renal Clear Cell Carcinoma (KIRC), Lung Adenocarcinoma (LUAD), Lung Squamous Cell Carcinoma (LUSC), Liver Hepatocellular Carcinoma (LIHC), Pancreatic Adenocarcinoma (PAAD), Prostate Adenocarcinoma (PRAD), Stomach Adenocarcinoma (STAD), Thyroid Carcinoma (THCA).

22

23

24

25

26

27

28

29

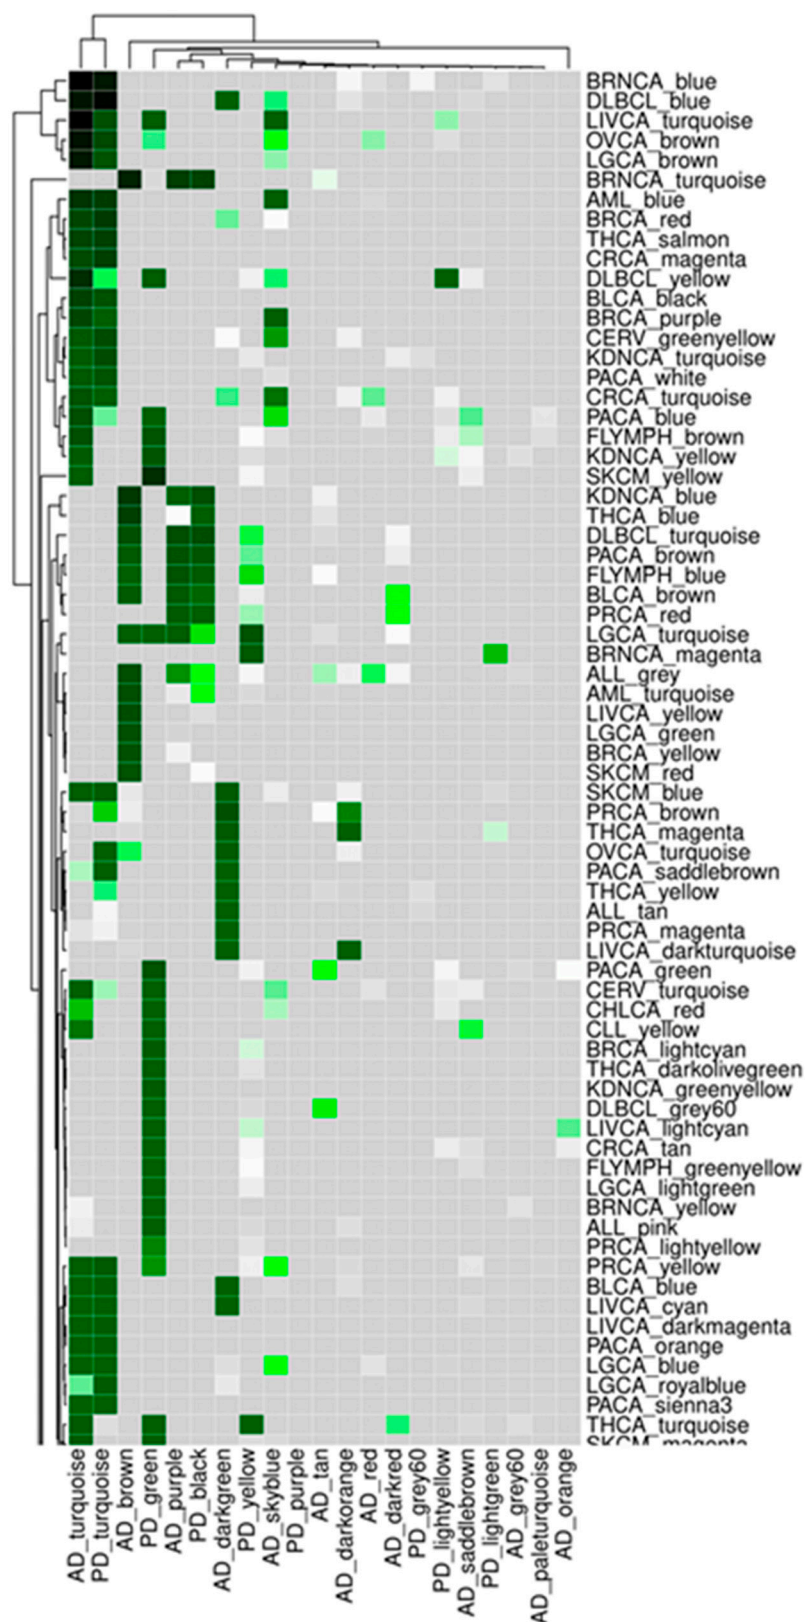



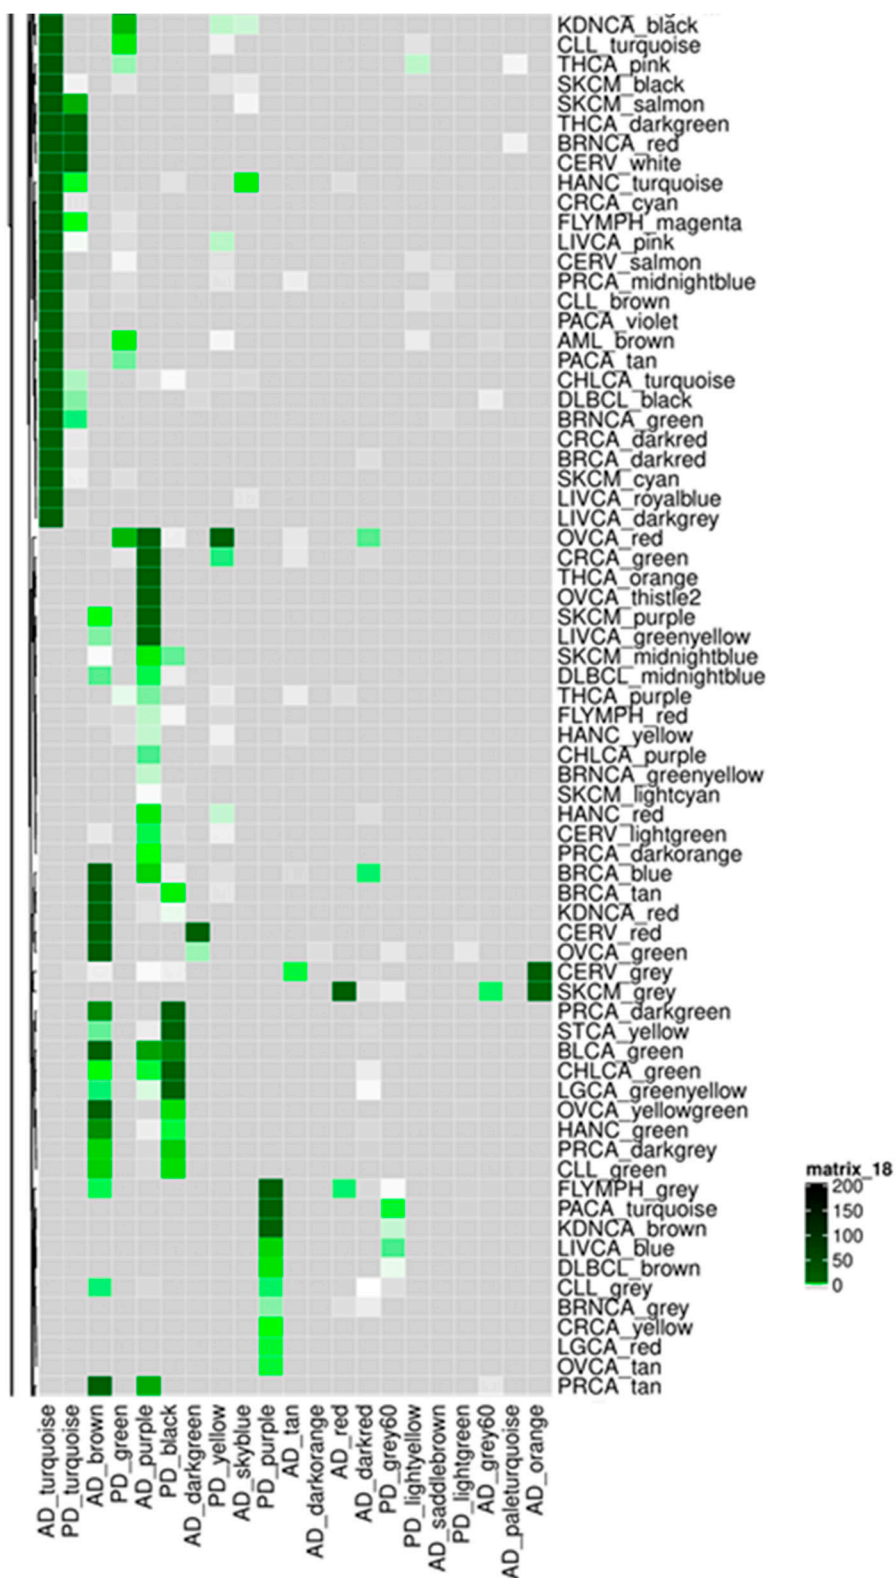

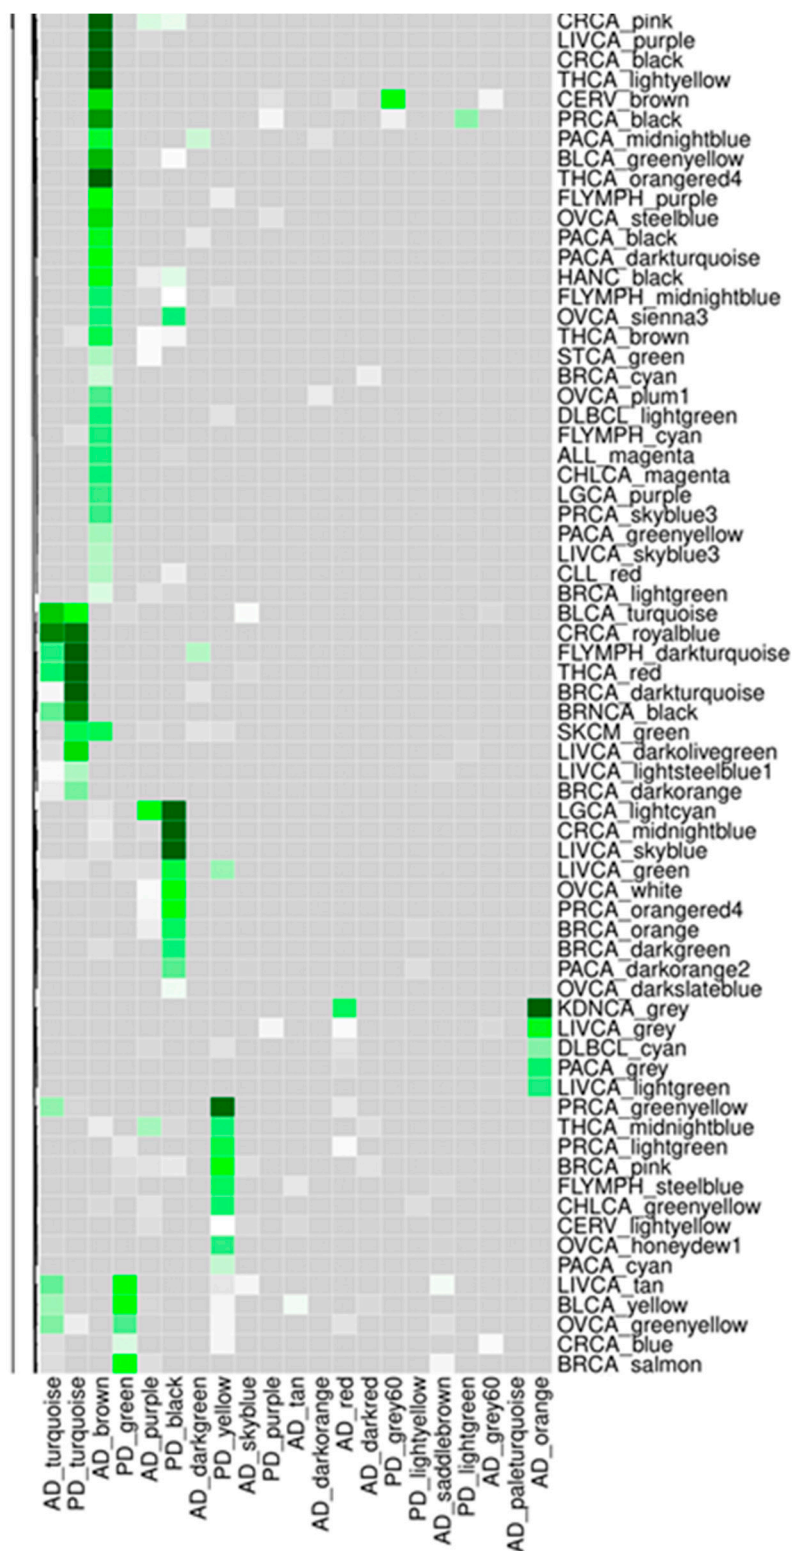

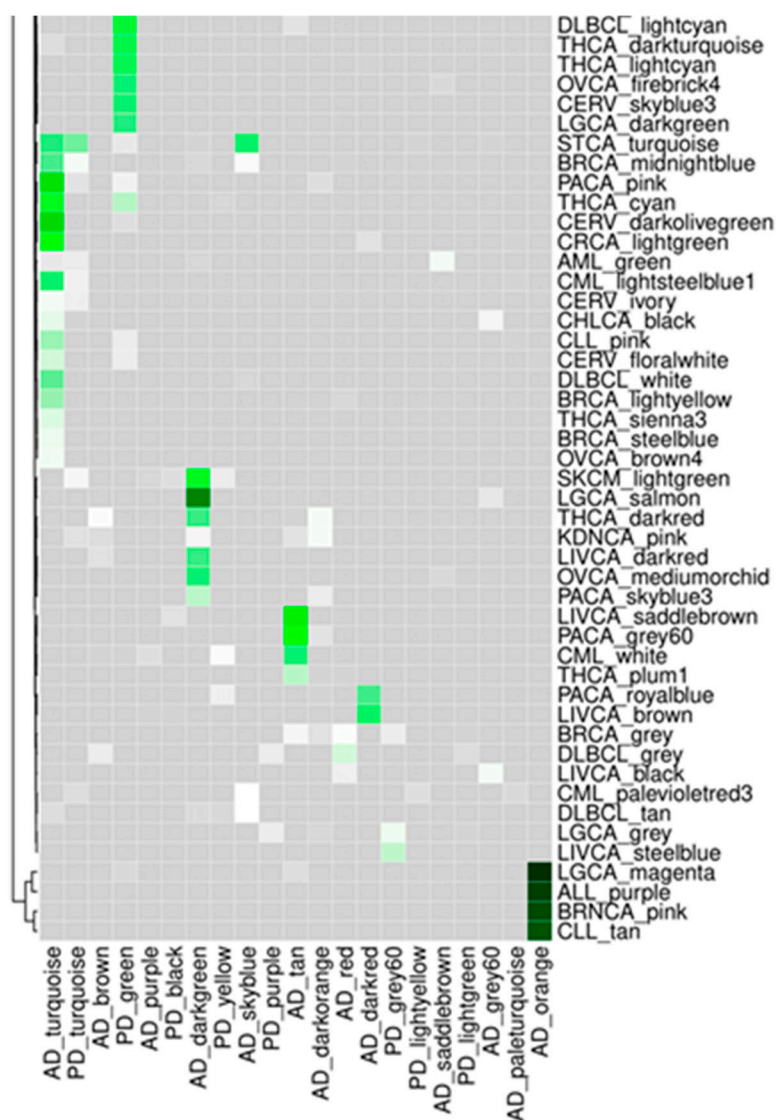

**Figure S5.** Consensus co-expression module overlap analyses results. Grey cell represent non-significant overlaps whereas the scale from white to green represent significant overlaps of decreasing FDR adjusted p-values.

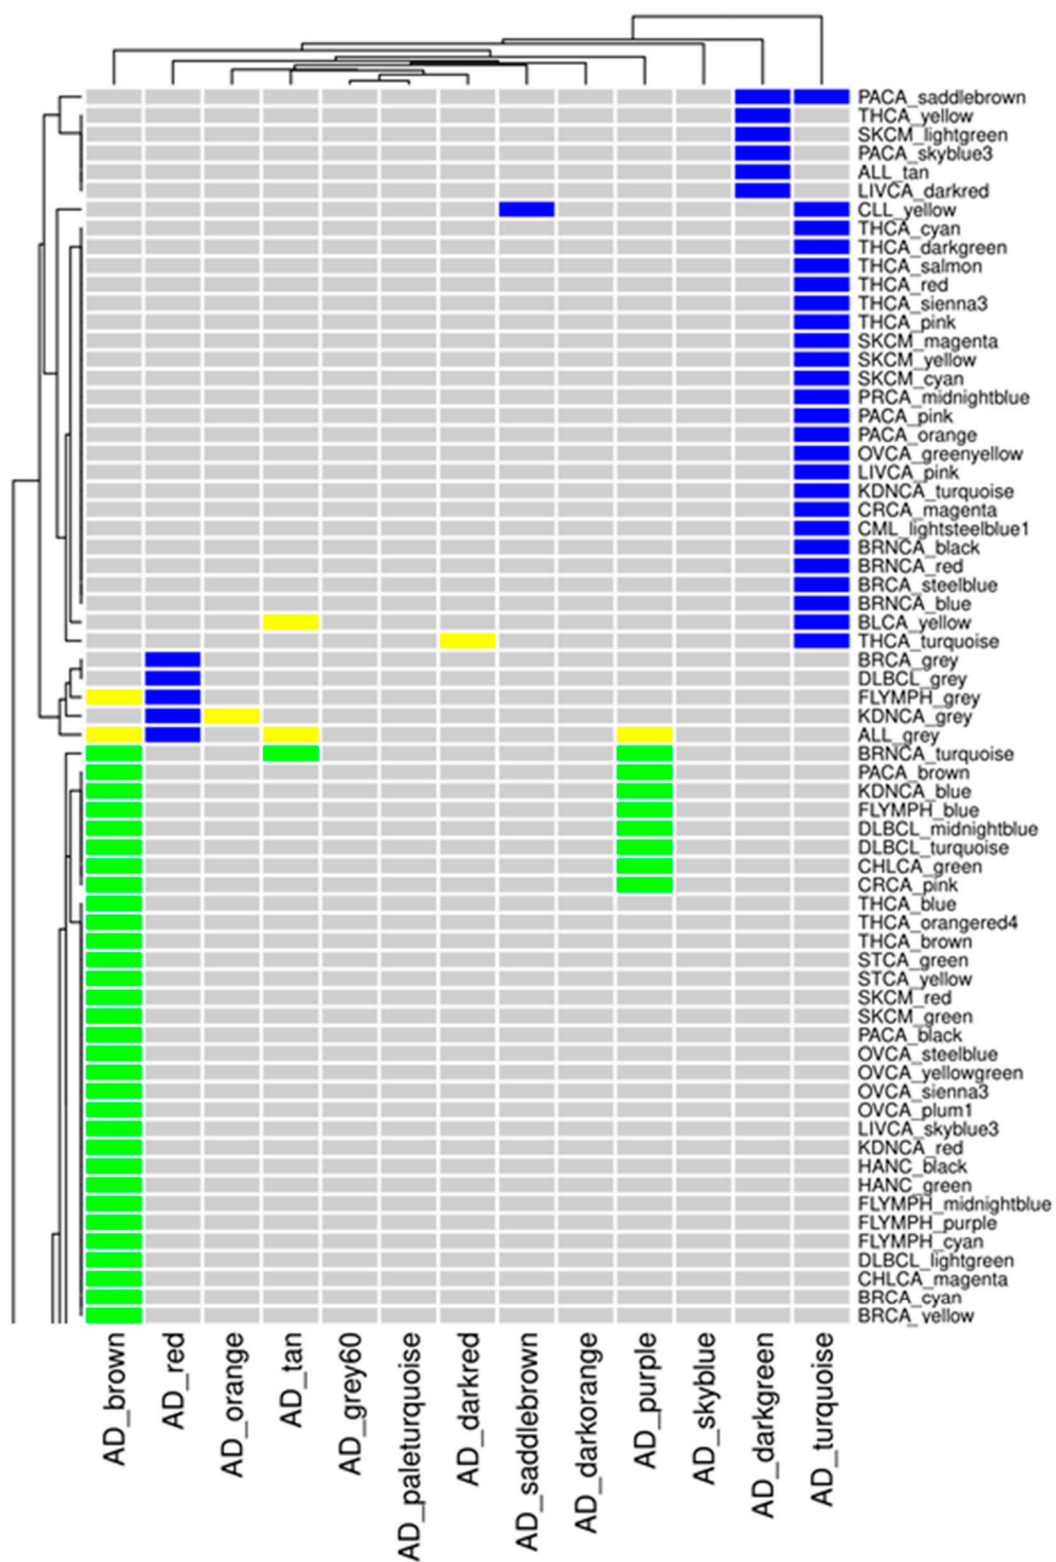



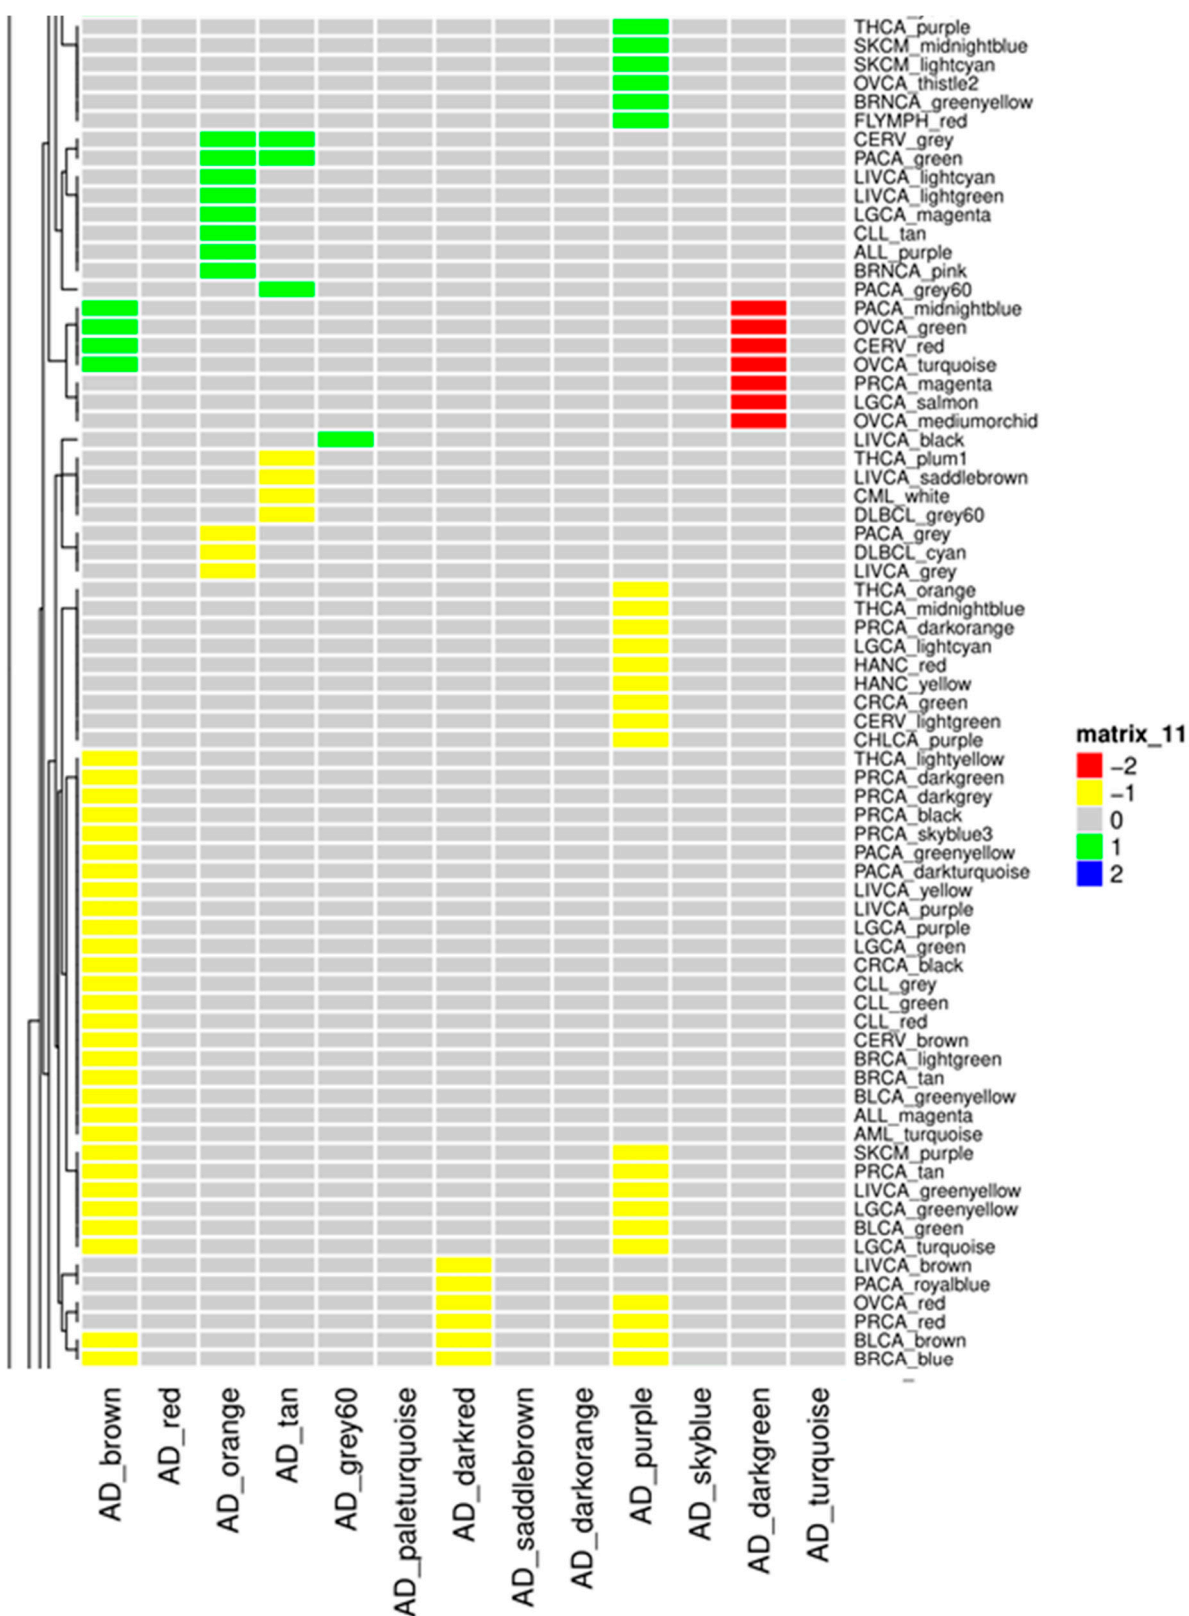

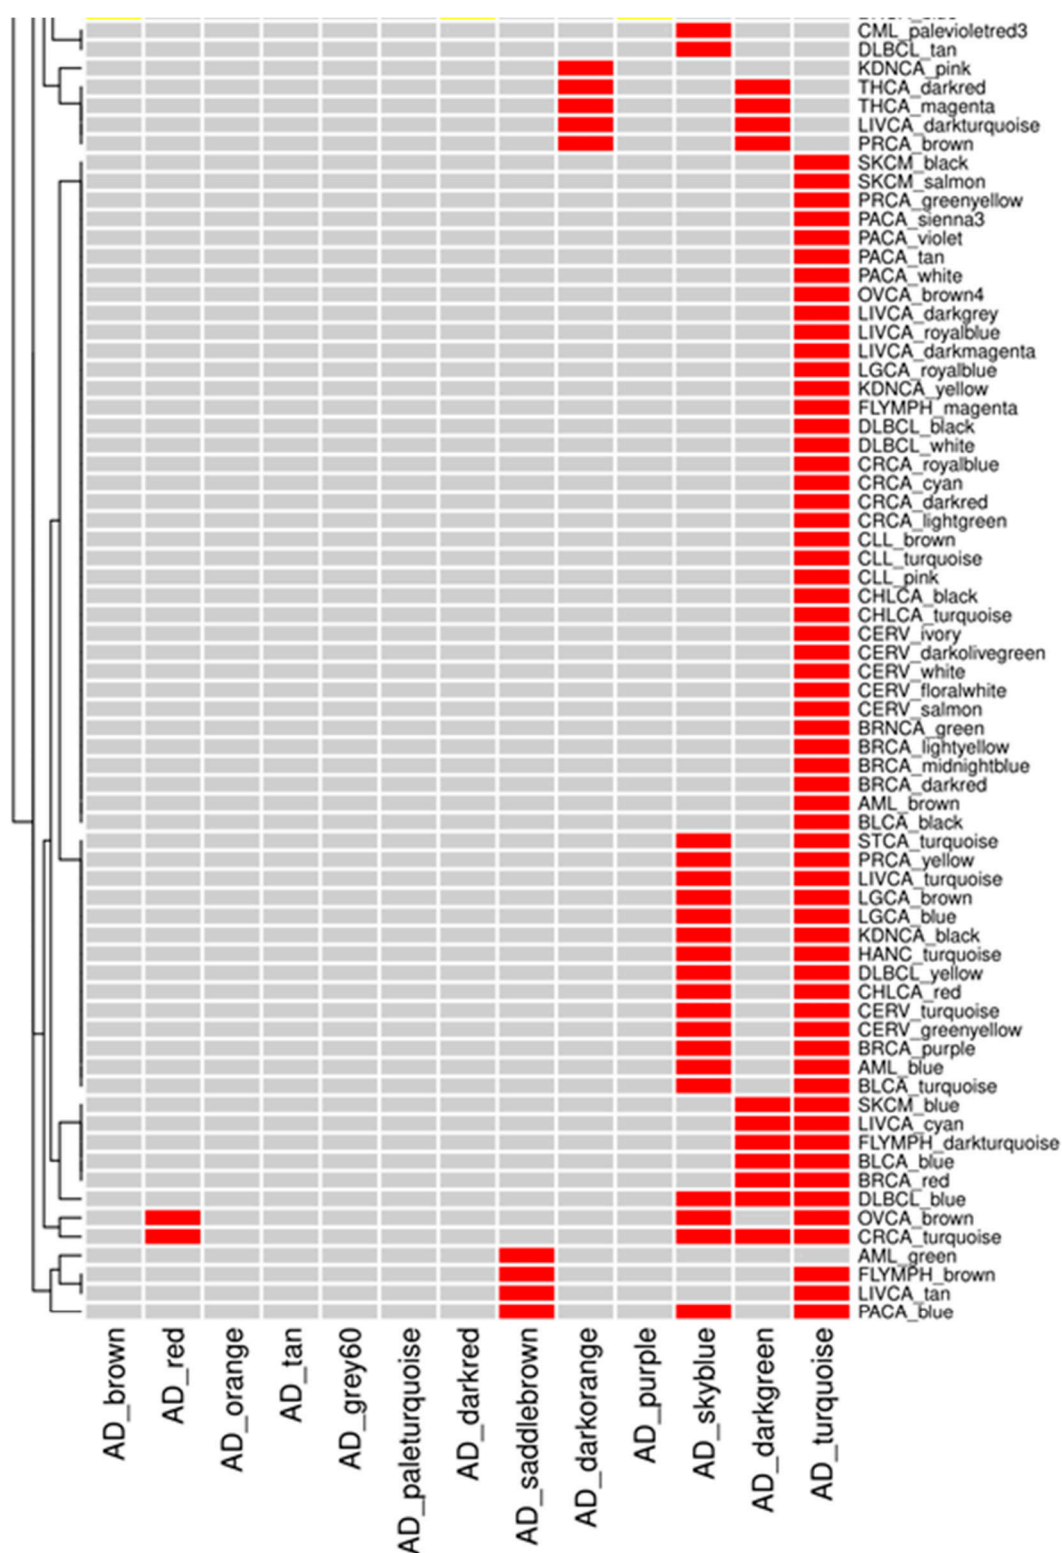

**Figure S6.** Module overlap analyses between the consensus co-expression modules significantly associated with disease status in AD and cancer analyses. Red cells represent modules presented significant overlaps in gene content which were found to be negatively correlated to disease status in both AD and cancer analyses. Yellow cells show modules presenting positive correlations with AD's disease status and negative correlations with cancer. Green cells show significant module overlaps between modules positively correlated with AD's disease status and positively correlated with cancer disease status. Blue cells show significant overlaps in modules negatively correlated to both AD and cancer disease status. Finally, grey cells show module pairs for which no significant overlap was found.

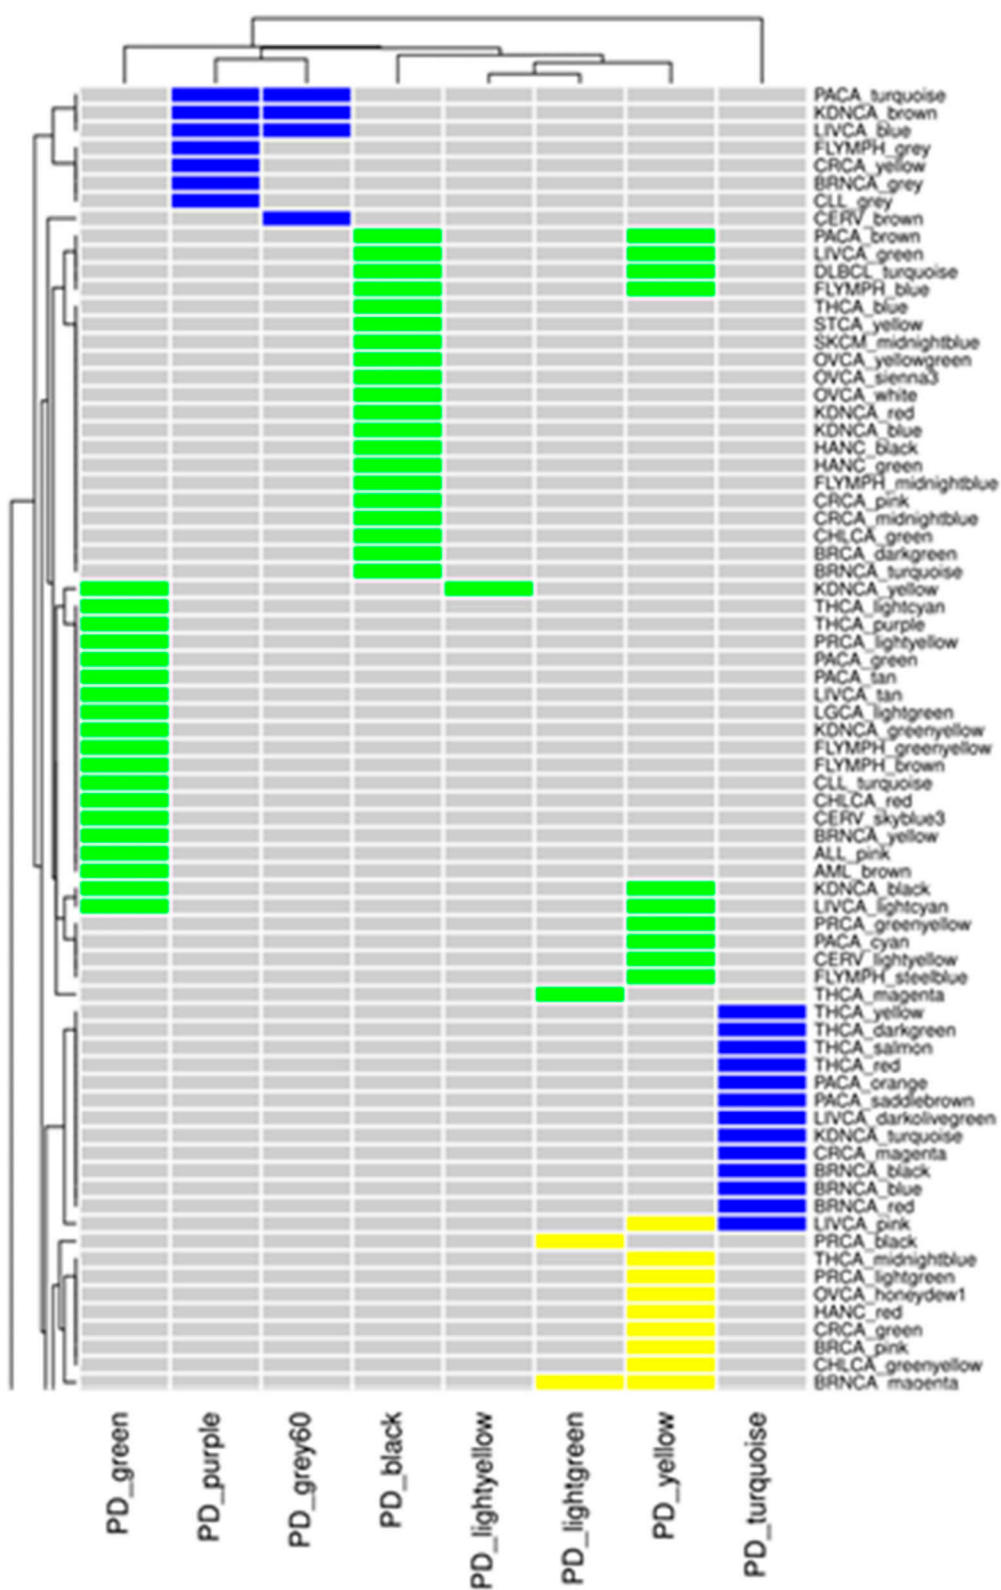

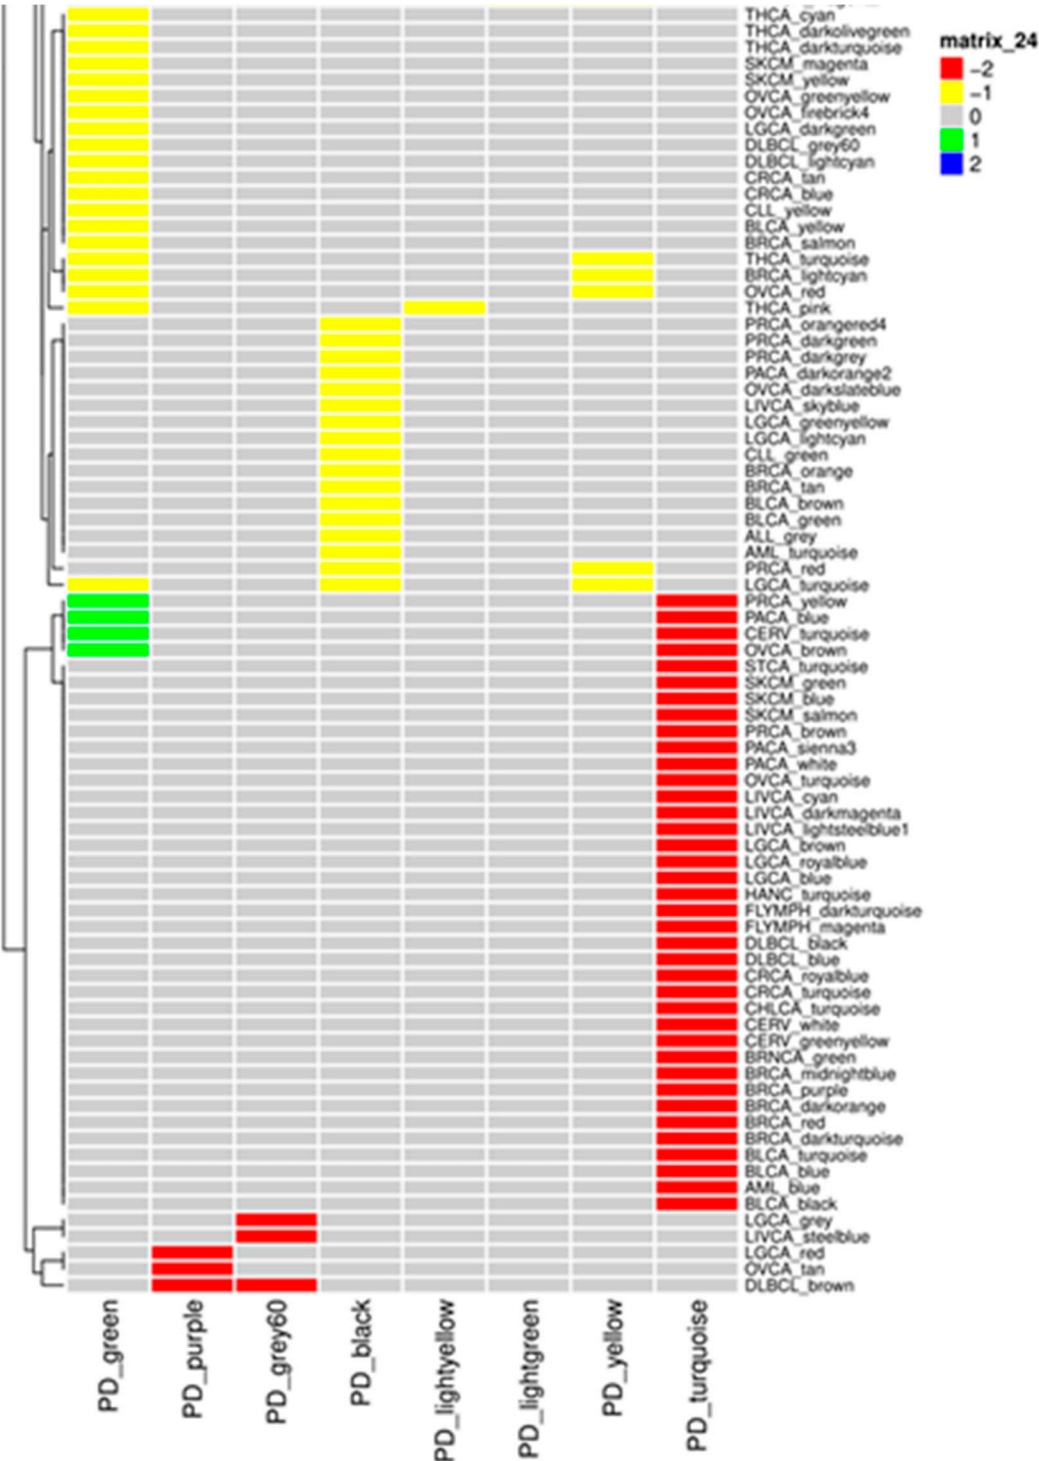

**Figure S7.** Module overlap analyses between the consensus co-expression modules significantly associated with disease status in AD and cancer analyses. Module overlap analyses between the consensus co-expression modules significantly associated with disease status in PD and cancer analyses. Red cells represent modules presented significant overlaps in gene content which were found to be negatively correlated to disease status in both PD and cancer analyses. Yellow cells show modules presenting positive correlations with PD's disease status and negative correlations with cancer. Green cells show significant module overlaps between modules positively correlated with PD's disease status and positively correlated with cancer disease status. Blue cells show significant overlaps in modules negatively correlated to both PD and cancer disease status. Finally, grey cells show module pairs for which no significant overlap was found.

1. Dubois, B., et al., *Advancing research diagnostic criteria for Alzheimer's disease: the IWG-2 criteria*. *Lancet Neurol*, 2014. **13**(6): p. 614-29. 57 58
2. Trist, B.G., D.J. Hare, and K.L. Double, *Oxidative stress in the aging substantia nigra and the etiology of Parkinson's disease*. *Aging Cell*, 2019. **18**(6): p. e13031. 59 60
3. Carvalho, B.S. and R.A. Irizarry, *A framework for oligonucleotide microarray preprocessing*. *Bioinformatics*, 2010. **26**(19): p. 2363-7. 61 62
4. Gautier, L., et al., *affy--analysis of Affymetrix GeneChip data at the probe level*. *Bioinformatics*, 2004. **20**(3): p. 307-15. 63
5. Ritchie, M.E., et al., *limma powers differential expression analyses for RNA-sequencing and microarray studies*. *Nucleic Acids Res*, 2015. **43**(7): p. e47. 64 65
6. Du, P., W.A. Kibbe, and S.M. Lin, *lumi: a pipeline for processing Illumina microarray*. *Bioinformatics*, 2008. **24**(13): p. 1547-8. 66 67
7. Langfelder, P. and S. Horvath, *WGCNA: an R package for weighted correlation network analysis*. *BMC Bioinformatics*, 2008. **9**: p. 559. 68 69
8. Colaprico, A., et al., *TCGAbiolinks: an R/Bioconductor package for integrative analysis of TCGA data*. *Nucleic Acids Res*, 2016. **44**(8): p. e71. 70 71
9. Kauffmann, A., R. Gentleman, and W. Huber, *arrayQualityMetrics--a bioconductor package for quality assessment of microarray data*. *Bioinformatics*, 2009. **25**(3): p. 415-6. 72 73
10. Wang, X., et al., *An R package suite for microarray meta-analysis in quality control, differentially expressed gene analysis and pathway enrichment detection*. *Bioinformatics*, 2012. **28**(19): p. 2534-6. 74 75
11. Sweeney, T.E., et al., *Methods to increase reproducibility in differential gene expression via meta-analysis*. *Nucleic Acids Res*, 2017. **45**(1): p. e1. 76 77
12. Choi, J.K., et al., *Combining multiple microarray studies and modeling interstudy variation*. *Bioinformatics*, 2003. **19 Suppl 1**: p. i84-90. 78 79
13. Ibanez, K., et al., *Molecular evidence for the inverse comorbidity between central nervous system disorders and cancers detected by transcriptomic meta-analyses*. *PLoS Genet*, 2014. **10**(2): p. e1004173. 80 81
14. Forés-Martos, J., et al., *Transcriptomic metaanalyses of autistic brains reveals shared gene expression and biological pathway abnormalities with cancer*. *Mol Autism*, 2019. **10**: p. 17. 82 83
15. Sanchez-Valle, J., et al., *A molecular hypothesis to explain direct and inverse co-morbidities between Alzheimer's Disease, Glioblastoma and Lung cancer*. *Sci Rep*, 2017. **7**(1): p. 4474. 84 85
16. Love, M.I., W. Huber, and S. Anders, *Moderated estimation of fold change and dispersion for RNA-seq data with DESeq2*. *Genome Biol*, 2014. **15**(12): p. 550. 86 87
17. Langfelder, P., P.S. Mischel, and S. Horvath, *When is hub gene selection better than standard meta-analysis?* *PLoS One*, 2013. **8**(4): p. e61505. 88 89
18. Langfelder, P. and S. Horvath, *Eigengene networks for studying the relationships between co-expression modules*. *BMC Syst Biol*, 2007. **1**: p. 54. 90 91
19. Yu, G., et al., *clusterProfiler: an R package for comparing biological themes among gene clusters*. *OMICS*, 2012. **16**(5): p. 284-7. 92 93
20. Langfelder, P., *anRichment: Collections and annotation data for use with anRichmentMethods*. 2020. 94
21. Sergushichev, A., *An algorithm for fast preranked gene set enrichment analysis using cumulative statistic calculation*. 2016. 95 96
22. MSigDB. Available from: <https://www.gsea-msigdb.org/gsea/msigdb>. 97
23. The Human Reference Interactome (HuRI). Available from: <http://www.interactome-atlas.org/>. 98



24. Luck, K., et al., *A reference map of the human binary protein interactome*. Nature, 2020. **580**(7803): p. 402-408. 99
25. Genotype-Tissue Expression (GTEx). Available from: <https://www.gtexportal.org/home/datasets>. 100
26. The comprehensive resource of mammalian protein complexes (CORUM). Available from: <http://mips.helmholtz-muenchen.de/corum/>. 101  
102
27. Matys, V., et al., *TRANSFAC and its module TRANSCompel: transcriptional gene regulation in eukaryotes*. Nucleic Acids Res, 2006. **34**(Database issue): p. D108-10. 103  
104
28. Matys, V., et al., *TRANSFAC: transcriptional regulation, from patterns to profiles*. Nucleic Acids Res, 2003. **31**(1): p. 374-8. 105  
106
29. Harmonizome. Available from: <http://amp.pharm.mssm.edu/Harmonizome/dataset/TRANSFAC+Curated+Transcription+Factor+Targets>. 107  
108
30. PhosphoSitePlus Available from: <https://www.phosphosite.org/homeAction.action>. 109
31. Kyoto Encyclopedia of Genes and Genomes (KEGG). Available from: <https://www.genome.jp/kegg/>. 110
32. Zhang, J.D. and S. Wiemann, *KEGGgraph: a graph approach to KEGG PATHWAY in R and bioconductor*. Bioinformatics, 2009. **25**(11): p. 1470-1. 111  
112
33. STRING. Available from: <https://string-db.org/>. 113
34. BioGRID. Available from: <https://thebiogrid.org/>. 114
35. DisGeNet. Available from: <https://www.disgenet.org/>. 115
36. The Phenotype Genotype Integrator (PheGenI). Available from: <https://www.ncbi.nlm.nih.gov/gap/phegeni>. 116
37. eDGAR. Available from: [http://edgar.biocomp.unibo.it/gene\\_disease\\_db/](http://edgar.biocomp.unibo.it/gene_disease_db/). 117
38. Menche, J., et al., *Disease networks. Uncovering disease-disease relationships through the incomplete interactome*. Science, 2015. **347**(6224): p. 1257601. 118  
119
39. Bulik-Sullivan, B., et al., *An atlas of genetic correlations across human diseases and traits*. Nat Genet, 2015. **47**(11): p. 1236-41. 120  
121
40. GWAS catalog. Available from: <https://www.ebi.ac.uk/gwas/downloads/summary-statistics>. 122
41. UK Biobank. Available from: <http://www.nealelab.is/uk-biobank>. 123
42. MEDI-an. Available from: <https://www.vumc.org/cpm/cpm-blog/medi-ensemble-medication-indication-resource-0>. 124  
125
43. RxNorm RESTful. Available from: <https://rxnav.nlm.nih.gov/RxNormAPIREST.html>. 126
44. Wickham, H., *httr Tools for Working with URLs and HTTP*. 2019. 127
45. Couture-Beil, A., *rjson: JSON for R*. 2018. 128
46. UniChem RESTful. Available from: <https://www.ebi.ac.uk/uniche/rest>. 129  
130
